# Supplementary material for: Identifying alternative models of healthcare service delivery to inform health system improvement: scoping review of systematic reviews
Source: PubMed Central journal article supplement — BMJ Open. 2020 Mar 29;10(3):e036112. doi: 10.1136/bmjopen-2019-036112 (PMC7170607; doi:10.1136/bmjopen-2019-036112), 2020-03-29
Supplement: bmjopen-2019-036112.draft_revisions.pdf [file bmjopen-2019-036112.draft_revisions.pdf]

# BMJ Open

BMJ Open is committed to open peer review. As part of this commitment we make the peer review history of every article we publish publicly available.

When an article is published we post the peer reviewers' comments and the authors' responses online. We also post the versions of the paper that were used during peer review. These are the versions that the peer review comments apply to.

The versions of the paper that follow are the versions that were submitted during the peer review process. They are not the versions of record or the final published versions. They should not be cited or distributed as the published version of this manuscript.

BMJ Open is an open access journal and the full, final, typeset and author-corrected version of record of the manuscript is available on our site with no access controls, subscription charges or pay-per-view fees (<http://bmjopen.bmj.com>).

If you have any questions on BMJ Open's open peer review process please email [info.bmjopen@bmj.com](mailto:info.bmjopen@bmj.com)

# BMJ Open

## Identifying alternative models of healthcare service delivery to inform health system improvement: a scoping review of systematic reviews

|                               |                                                                                                                                                                                                                                                                                                                                                                                                                                                                                                                                                                                                                                                                                                                                                                                                                                                                                                                                                                                                                                                                                                                                                                        |
|-------------------------------|------------------------------------------------------------------------------------------------------------------------------------------------------------------------------------------------------------------------------------------------------------------------------------------------------------------------------------------------------------------------------------------------------------------------------------------------------------------------------------------------------------------------------------------------------------------------------------------------------------------------------------------------------------------------------------------------------------------------------------------------------------------------------------------------------------------------------------------------------------------------------------------------------------------------------------------------------------------------------------------------------------------------------------------------------------------------------------------------------------------------------------------------------------------------|
| Journal:                      | <i>BMJ Open</i>                                                                                                                                                                                                                                                                                                                                                                                                                                                                                                                                                                                                                                                                                                                                                                                                                                                                                                                                                                                                                                                                                                                                                        |
| Manuscript ID                 | bmjopen-2019-036112                                                                                                                                                                                                                                                                                                                                                                                                                                                                                                                                                                                                                                                                                                                                                                                                                                                                                                                                                                                                                                                                                                                                                    |
| Article Type:                 | Original research                                                                                                                                                                                                                                                                                                                                                                                                                                                                                                                                                                                                                                                                                                                                                                                                                                                                                                                                                                                                                                                                                                                                                      |
| Date Submitted by the Author: | 03-Dec-2019                                                                                                                                                                                                                                                                                                                                                                                                                                                                                                                                                                                                                                                                                                                                                                                                                                                                                                                                                                                                                                                                                                                                                            |
| Complete List of Authors:     | <p>Jessup, Rebecca; Cabrini Institute, Monash Department of Clinical Epidemiology; Monash University, Department of Epidemiology and Preventive Medicine, School of Public Health and Preventive Medicine</p> <p>Putrik, Polina; Cabrini Institute, Monash Department of Clinical Epidemiology; Monash University, Dept of Epidemiology and Preventive Medicine</p> <p>Buchbinder, Rachele; Cabrini Institute, Monash Department of Clinical Epidemiology; Monash University, Dept of Epidemiology and Preventive Medicine</p> <p>Nezon, Janet; Cabrini Institute, Monash Department of Clinical Epidemiology</p> <p>Rischin, Kobi; Cabrini Institute, Monash Department of Clinical Epidemiology; Monash University, Dept of Epidemiology and Preventive Medicine</p> <p>Cyril, Sheila; Cabrini Institute, Monash Department of Clinical Epidemiology; Monash University, Dept of Epidemiology and Preventive Medicine</p> <p>Shepperd, S; University of Oxford, Nuffield Department of Population Health</p> <p>O'Connor, Denise; Cabrini Institute, Monash Department of Clinical Epidemiology; Monash University, Dept of Epidemiology and Preventive Medicine</p> |
| Keywords:                     | Health economics < HEALTH SERVICES ADMINISTRATION & MANAGEMENT, Health policy < HEALTH SERVICES ADMINISTRATION & MANAGEMENT, Organisation of health services < HEALTH SERVICES ADMINISTRATION & MANAGEMENT                                                                                                                                                                                                                                                                                                                                                                                                                                                                                                                                                                                                                                                                                                                                                                                                                                                                                                                                                             |
|                               |                                                                                                                                                                                                                                                                                                                                                                                                                                                                                                                                                                                                                                                                                                                                                                                                                                                                                                                                                                                                                                                                                                                                                                        |

SCHOLARONE™  
Manuscripts

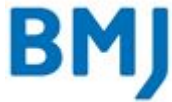

I, the Submitting Author has the right to grant and does grant on behalf of all authors of the Work (as defined in the below author licence), an exclusive licence and/or a non-exclusive licence for contributions from authors who are: i) UK Crown employees; ii) where BMJ has agreed a CC-BY licence shall apply, and/or iii) in accordance with the terms applicable for US Federal Government officers or employees acting as part of their official duties; on a worldwide, perpetual, irrevocable, royalty-free basis to BMJ Publishing Group Ltd ("BMJ") its licensees and where the relevant Journal is co-owned by BMJ to the co-owners of the Journal, to publish the Work in this journal and any other BMJ products and to exploit all rights, as set out in our [licence](#).

The Submitting Author accepts and understands that any supply made under these terms is made by BMJ to the Submitting Author unless you are acting as an employee on behalf of your employer or a postgraduate student of an affiliated institution which is paying any applicable article publishing charge ("APC") for Open Access articles. Where the Submitting Author wishes to make the Work available on an Open Access basis (and intends to pay the relevant APC), the terms of reuse of such Open Access shall be governed by a Creative Commons licence – details of these licences and which [Creative Commons](#) licence will apply to this Work are set out in our licence referred to above.

Other than as permitted in any relevant BMJ Author's Self Archiving Policies, I confirm this Work has not been accepted for publication elsewhere, is not being considered for publication elsewhere and does not duplicate material already published. I confirm all authors consent to publication of this Work and authorise the granting of this licence.

1  
2  
3 **Identifying alternative models of healthcare service delivery to inform health system**  
4 **improvement: a scoping review of systematic reviews**  
5  
6  
7  
8  
9

10 **Rebecca L Jessup<sup>1,2,3</sup>, Polina Putrik<sup>1,2</sup>, Rachele Buchbinder<sup>1,2</sup>, Janet Nezon<sup>1</sup>, Kobi Rischin<sup>1,2</sup>,**  
11 **Sheila Cyril<sup>1,2</sup>, Sasha Shepperd<sup>4</sup>, Denise A O'Connor<sup>\*1,2</sup>**  
12  
13  
14  
15  
16

17  
18 1 Monash Department of Clinical Epidemiology, Cabrini Institute, Malvern, 3144  
19

20 2 Department of Epidemiology and Preventive Medicine, School of Public Health and  
21 Preventive Medicine, Monash University, Melbourne, 3004  
22  
23

24  
25 3 Department of Allied Health, Northern Health, Melbourne 3076  
26

27 4 Nuffield Department of Population Health, University of Oxford, Oxford, UK, OX3 7LF  
28  
29  
30  
31  
32  
33  
34

35 **\* Corresponding author:**  
36  
37

38 **4 Drysdale Street, Malvern VIC 3144, Australia**  
39  
40

41  
42 **Ph +61 9508 3428, e: [Denise.OConnor@monash.edu](mailto:Denise.OConnor@monash.edu)**  
43  
44  
45  
46  
47  
48  
49  
50

51 **Key words:** healthcare delivery, models of care, scoping review  
52  
53  
54  
55

56 **Main body word count: 4,467**  
57  
58  
59  
60

## Abstract

**Objective:** Health systems face the challenge of identifying evidence to guide decision-making on the delivery of services that maximise health outcomes and contain cost. The objective of this scoping review was to describe the extent, range and nature of available evidence from systematic reviews of alternative healthcare delivery arrangements relevant to high-income countries.

**Design:** Scoping review of systematic reviews.

**Methods:** We included English language systematic reviews examining the effects of alternative delivery arrangements relevant to high-income countries, indexed in PDQ-Evidence and published between 2012 and 2017. We extracted data on the characteristics of included reviews, including year of publication, number and design of primary studies, populations/health conditions, types of interventions and outcomes reported and whether the reviews included economic evaluations.

**Results:** Of 829 retrieved records, 531 reviews fulfilled our inclusion criteria. Almost all (93%) reviews reported on patient outcomes while only about one third included resource use as an outcome of interest. Just over a third (n=189, 36%) of reviews focused on alternative information and communications technology interventions (including 162 reviews on telehealth). About one quarter (n=122, 23%) of reviews focused on alternative care co-ordination interventions. 15% (n=80) of reviews examined interventions involving changes to who provides care and how the healthcare workforce is managed. Few reviews investigated the effects of interventions involving changes to how and when care is delivered (n=47, 9%) or interventions addressing a goal-focused question (n=38, 7%).

**Conclusions:** A substantial body of evidence about the effects of a wide range of delivery arrangements is available to inform health system improvements. This scoping review provides a map of the extent, range and nature of available synthesised evidence and identifies gaps that would be usefully addressed by future research.

## Article summary

### Strengths and limitations of this study

- We have followed published methodological guidance for conducting this scoping review
- The search was limited to the last 5 years to retrieve up-to-date reviews of alternative delivery arrangements relevant to high-income countries
- As this scoping review sought to map the state of the literature in this area, we did not appraise the quality of the included reviews and did not attempt to synthesise the results of the included systematic reviews
- Systematic reviews that were awaiting classification in 'Pretty Darn Quick'-Evidence at the moment of search were not captured in the search

### Background

The last century has seen a continuous growth in investment in the health systems of high-income countries [1]. This has contributed to significant improvements in population health and a reduction in demand for medical care of communicable diseases, but a proportional increase in demand for the management of chronic and complex conditions [2, 3]. In addition, advances in medical technology, and more population based screening and management of disease risk factors have increased the scope of healthcare services [4, 5][6-8]. Taken together, this has fuelled the inflation of healthcare costs [1]. The cost of delivering healthcare in most high income countries is now considered unsustainable and is expected to be unaffordable by the middle of the 21st century without major reforms [1].

A challenge for healthcare systems and funders is how to deliver high-value, effective care while slowing (and where possible reversing) the rate of increase in costs. This requires an understanding of the effectiveness and economic impact of current service models, and a determination of whether there are alternative models of healthcare delivery that might lead to improved efficiencies without compromising the quality and outcomes of care..

1  
2  
3 The value of a given model of healthcare service delivery is based upon its ratio of benefits  
4 and harms relative to its cost [9, 10]. In an ideal health system, healthcare resources should  
5  
6 be allocated across interventions and population groups to generate the highest possible  
7  
8 overall level of population health at the lowest cost. In practice, this means reallocating  
9  
10 resources away from resource intensive interventions that have little or no benefit and  
11  
12 redistributing to cost-effective and/or resource-wise interventions to enhance the allocative  
13  
14 efficiency of health systems. Reconfiguring the way healthcare is delivered may be one  
15  
16 method for improving the allocation of finite healthcare resources.  
17  
18  
19  
20  
21  
22

23  
24 There are a number of different ways that healthcare delivery may be modified, including  
25  
26 changing the location that healthcare is delivered (e.g., hospital to home), providing care in  
27  
28 a group setting rather than to individuals, substituting care provided by one health  
29  
30 professional to care provided by an alternative appropriately trained healthcare  
31  
32 professional or lay person, or using technology to assist with the provision of care (e.g.  
33  
34 telehealth). Provision of services in alternative ways such as this may lead to similar, and in  
35  
36 some cases better, outcomes for patients. However, they may also modify the costs (or shift  
37  
38 them to other stakeholders) or the demand for service due to more liberal access.  
39  
40  
41 Therefore, in addition to effectiveness, robust economic evaluations of alternative models  
42  
43 of care delivery are required to inform decisions about the allocation of funding based on  
44  
45 their relative value. High cost models that deliver benefits to patients may still be good  
46  
47 value, while low-cost models of care that provide little or no benefit may have limited value  
48  
49  
50  
51  
52  
53 [9].  
54  
55

56  
57 Numerous systematic reviews summarising the effects of alternative models of care delivery  
58  
59 have been published to date. Almost all have focused on changes in the delivery of  
60

1  
2  
3 healthcare for a single condition [11], a change to the scope of practice of a single type of  
4  
5 health professional role in a specific setting [12], or a single delivery arrangement type such  
6  
7 as chronic disease programs [13], multidisciplinary care, or integrated care interventions  
8  
9 [14]. A Cochrane overview of alternative delivery arrangements relevant to low-income  
10  
11 countries was recently published [15]. Given the differences between low-income and high-  
12  
13 income countries in terms of service demands and access to specialist care and  
14  
15 technologies, the findings of this overview may have less relevance or applicability to service  
16  
17 delivery in high-income countries. No similar study of alternative delivery arrangements  
18  
19 relevant to high-income countries has been published to date.  
20  
21  
22  
23  
24  
25

26 The aim of this scoping review was to describe the extent, range and nature of available  
27  
28 systematic reviews of alternative delivery arrangements for health systems relevant to high-  
29  
30 income countries published in the last five years. A timeframe of five years was chosen to  
31  
32 ensure that the review contained evidence and data about effects that are most up-to-date,  
33  
34 reliable and potentially ready to implement. A secondary aim was to identify gaps in the  
35  
36 availability of up-to-date systematic reviews of alternative delivery arrangements needed to  
37  
38 inform health system sustainability initiatives and future research directions.  
39  
40  
41  
42  
43

44 This review forms part of a five-year Partnership Centre for Health Systems Sustainability,  
45  
46 funded by the Australian National Health and Medical Research Council (NHMRC) and other  
47  
48 partners. The Partnership Centre is a collaborative of investigators, system leaders, expert  
49  
50 advisors, system implementation partners, and funding partners from around Australia and  
51  
52 aims to investigate and create interventions to improve health system performance  
53  
54 sustainability (<https://www.healthsystemsustainability.com.au/>).  
55  
56  
57  
58  
59

## 60 **METHODS**



## Protocol

The protocol for this scoping review has been published [16] (Supplementary file 1). It was informed by the methodological framework that emphasises transparency of the scoping review process to increase the reliability of the findings[17,18]. Scoping reviews such as this are particularly useful for systematically mapping research findings across a body of research evidence that is heterogeneous and/or complex in nature. We reported our scoping review according to the PRISMA for Scoping Reviews (PRISMA-ScR) statement [19].

## Criteria for considering reviews for inclusion

All English language systematic reviews examining the effects of alternative delivery arrangements for health systems relevant to high-income countries published in the last five years were included. Alternative delivery arrangements include changes to the method of how and when care is delivered, where care is provided and changes to the healthcare environment, who provides care and how the workforce is managed, co-ordination of care and management of care processes, and information and communication technology (ICT)\_systems [20].

For inclusion, systematic reviews needed to assess the effects of alternative delivery arrangements of relevance to high-income countries (as classified by the World Bank for the 2017 fiscal year) [21], have a methods section with explicit inclusion criteria, and report at least one of the following outcomes: patient outcomes (health status, health behaviours), quality of care, access and/ or utilisation of healthcare services, resource use, impacts on equity and/ or social outcomes, healthcare provider outcomes, or adverse effects. Systematic reviews that included interventions in any setting were included and

1  
2  
3 encompassed hospital (inpatient or outpatient care, acute or subacute), primary care, long-  
4  
5 term care facilities/ residential care and the community.  
6  
7

### 8 9 **Search methods for identifying reviews**

10  
11  
12 'Pretty Darn Quick' (PDQ)-Evidence was searched to identify systematic reviews of  
13  
14 interventions to improve the organisation of healthcare services published between 1<sup>st</sup>  
15  
16 January 2012 and 20<sup>th</sup> September 2017. PDQ-Evidence is a database of evidence for  
17  
18 decisions about health systems derived from the Epistemonikos database of systematic  
19  
20 reviews. PDQ-Evidence includes the following databases: Cochrane Database of Systematic  
21  
22 Reviews (CDSR), Database of Abstracts of Reviews of Effectiveness (DARE), MEDLINE via  
23  
24 PubMed, EMBASE, CINAHL, PsycINFO, Latin American and Caribbean Health Sciences  
25  
26 Literature (LILACS), JBI Database of Systematic Reviews and Implementation Reports,  
27  
28 Evidence for Policy and Practice Information and Co-ordinating Centre (EPPI-Centre)  
29  
30 Evidence Library, and the Campbell Collaboration online library. The 'intervention'  
31  
32 publication filter was used to include only systematic reviews that included studies of  
33  
34 interventions, and excluded diagnostic (impact and accuracy), prognostic, prediction  
35  
36 (diagnostic and prognostic) and qualitative systematic reviews.  
37  
38  
39  
40  
41  
42  
43  
44

### 45 **Selection of reviews**

46  
47  
48 Two review authors (RJ, SC) independently screened the titles and abstracts and coded as  
49  
50 'retrieve' (potentially eligible or unclear) or 'do not retrieve' (ineligible). At least two of four  
51  
52 review authors (RJ, PP, JN, KR) independently screened the full text reports for inclusion..  
53  
54  
55 The reason for exclusion of ineligible systematic reviews was recorded. Disagreements were  
56  
57  
58  
59  
60

1  
2  
3 resolved through discussion or involvement of a third review author (DOC or RB). A PRISMA  
4  
5 flow diagram was developed to summarise the search and selection process (Figure 1).  
6  
7

### 8 9 **Data extraction and management**

10  
11  
12 Data was extracted on systematic review characteristics (year of publication, authors,  
13  
14 number and design of included studies, journal), population, health condition/s (where  
15  
16 reported), types of outcomes of interest (namely, patient outcomes, quality of care, access  
17  
18 and/ or utilisation of healthcare services, resource use, impacts on equity, social outcomes,  
19  
20 healthcare provider outcomes, adverse effects), and whether reviews included economic  
21  
22 analyses. A data extraction form was piloted and refined [18]. Review authors involved in  
23  
24 data extraction (RJ, PP, JN, KR) independently extracted data from the first ten included  
25  
26 reviews and discussed their findings to ensure consistency. Consistency of extraction was  
27  
28 also performed independently by two review authors (RJ, PP) for a third of included reviews  
29  
30 to ensure data collection was robust and to determine level of agreement. As the mean  
31  
32 agreement across review authors was 93% a single review author independently extracted  
33  
34 the data from the remaining included reviews.  
35  
36  
37  
38  
39  
40  
41  
42

### 43 **Collating and summarising results**

44  
45  
46 Delivery arrangements were categorised using the Cochrane Effective Practice and  
47  
48 Organisation of Care (EPOC) taxonomy of health system interventions[20] which  
49  
50 characterizes interventions according to conceptual, functional and/or practical similarities.  
51  
52 The delivery arrangement domain of the taxonomy classifies interventions into five  
53  
54 categories (and related subcategories) based on changes to the following:  
55  
56  
57  
58  
59

- 60 1. how and when care is delivered;

- 2.
3. where care is provided and changes to the healthcare environment;
- 4.
5. who provides care and how the healthcare workforce is managed;
- 6.
- 7.
8. co-ordination of care and management of care processes; and
- 9.
- 10.
11. 5. ICT systems.
- 12.
- 13.

14 To this taxonomy we added a category of goal-focused reviews. This was used to categorise  
15 systematic reviews that included delivery arrangements from more than one of the above  
16 categories to address a specific problem or goal.  
17  
18

19 As this was a scoping review, rather than an overview of systematic reviews designed to  
20 synthesise the results of the included systematic reviews, a critical appraisal of the quality of  
21 the included systematic reviews was not conducted.  
22  
23

24 We summarised our findings quantitatively by presenting a numerical count of reviews in  
25 each delivery arrangement category, visually using a bubble chart to display the quantity  
26 and range of reviews across categories, and also using a narrative synthesis.  
27  
28

## 29 **RESULTS**

### 30 **Results of search**

31 The search yielded 829 citations. After title and abstract screening, 623 full text reports  
32 were retrieved and assessed for eligibility. 92 full text reports were excluded and 531  
33 systematic reviews were included (Figure 1). The citations of included reviews are in  
34 Supplementary file 2.  
35  
36

### 37 **Description of included reviews**

1  
2  
3 Of the 531 systematic reviews, 125 (24%) were Cochrane reviews. 224 (42%) reviews were  
4 published in 2016-2017. A total of 12,230 individual studies were included across all  
5 systematic reviews, and these included 6,911 randomised controlled trials. 106 (20%)  
6 reviews focused on common chronic diseases (e.g., diabetes, chronic obstructive pulmonary  
7 disease, heart failure, chronic kidney failure, asthma, musculoskeletal conditions) and 53  
8 (10%) reviews focused on patients undergoing lifestyle and prevention interventions. Over  
9 90% of reviews examined the effects of alternative delivery arrangements on patient  
10 outcomes (e.g. mortality, morbidity). Approximately one third of reviews reported access  
11 and/ or utilisation of healthcare services as outcomes. One third of reviews included  
12 economic evaluation studies. Only 12% of reviews included quality of care measures as  
13 outcomes and only 6% and 3% of reviews reported impacts of alternative delivery  
14 arrangements on equity and social outcomes, respectively (Table 1).

15  
16  
17  
18  
19  
20  
21  
22  
23  
24  
25  
26  
27  
28  
29  
30  
31  
32  
33 Figure 2 provides an overview of the 531 systematic reviews, organised according to the  
34 Cochrane EPOC taxonomy. The greatest number of reviews focused on changes to ICT  
35 systems used by healthcare organisations to manage the delivery of healthcare (n=189). The  
36 majority of these focused on telehealth interventions (n=162). The fewest number of  
37 reviews (excluding goal-focused) were concerned with changes to how and when healthcare  
38 is delivered (n=47). The reviews relating to each category are described in more detail  
39 below.

### 40 41 42 43 44 45 46 47 48 49 50 51 **1. How and when care is delivered**

52  
53  
54  
55 Of the 47 systematic reviews included in this category, 14 (30%) were Cochrane reviews and  
56 16 (34%) were published in 2016-2017 (Table 2). A total of 1085 primary studies were  
57  
58  
59  
60

1  
2  
3 included in systematic reviews for this category, including 394 (36%) randomised controlled  
4  
5 trials.  
6  
7

8  
9 Systematic reviews in this category included a number of quality and safety initiatives (e.g.,  
10 use of safety checklists to reduce wrong site surgery), alternative methods for queuing  
11 patients (e.g., patient-initiated clinics in chronic disease, strategies to reduce waiting times  
12 for elective surgery procedures). Many of the reviews in this category were not focused on a  
13 specific health condition (n=17, 36%), but where they were, the greatest number of reviews  
14 related to maternal and child health (n=7, 15%) (Supplementary file 3). Few systematic  
15 reviews examined group versus individual care (n=5, 11%) (e.g., group antenatal care for  
16 pregnant women), or triage strategies (n=2, 4%) (e.g., improving patient flow the emergency  
17 department). There was one Cochrane review with no included studies focused on walk-in  
18 clinics versus physician offices and emergency rooms for urgent care and chronic disease  
19 management.  
20  
21  
22  
23  
24  
25  
26  
27  
28  
29  
30  
31  
32  
33  
34  
35  
36

## 37 **2. Where care is provided and changes to the healthcare environment**

38  
39  
40 There were 55 systematic reviews included in this category, 24 (44%) were Cochrane  
41 reviews and 21 (38%) were published in 2016-2017. Of 1002 primary studies in this  
42 category, 323 (32%) were randomised controlled trials.  
43  
44  
45  
46  
47

48  
49 Most reviews investigated changes to the site of healthcare delivery (n=51, 93%) with the  
50 majority of these focused on shifting care away from the hospital setting to the home  
51 (n=32). The remaining reviews focused on shifting care from the inpatient to the outpatient  
52 or day stay setting (e.g. outpatient versus inpatient management for acute pulmonary  
53 embolism) (n=6); from the hospital to primary or community care organisations (e.g.,  
54  
55  
56  
57  
58  
59  
60

1  
2  
3 primary care asthma clinics) (n=4); from hospital to a therapeutic community (e.g., for  
4  
5 mental health care) (n=2); provision of care in at site (e.g., pre-hospital versus in-hospital  
6  
7 thrombolysis) (n=4), or provision of care in schools (e.g., for mental health and health  
8  
9 equity) (n=3). A small number of reviews in this category looked at changes to other aspects  
10  
11 of the healthcare environment, including the physical or sensory environment (n=1)  
12  
13 (rooming in services for pregnant mothers), outreach services (n=1) (mobile screening clinics  
14  
15 for maternal and child health), and transportation services (n=1) (helicopter emergency  
16  
17 medical services for adults with major trauma) and centralization of services (n=1) (for  
18  
19 gynaecological cancer).

20  
21 Ten reviews (18%) in this category focused on maternal and child health, five (9%) focused  
22  
23 on mental health and five (9%) focused on cardiovascular disease, while the remainder  
24  
25 focused on a range of chronic and complex conditions and lifestyle and preventive care  
26  
27 (Supplementary file 3). There was one Cochrane review containing no included studies on  
28  
29 home-based phototherapy for the management of non-haemolytic jaundice in infants.

### 3. Who provides care and how the healthcare workforce is managed

30  
31 There were 80 systematic reviews included in this category, 18 (23%) were Cochrane  
32  
33 reviews and 31 (39%) were published in 2016-2017. Of 1408 primary studies in this  
34  
35 category, 802 (57%) were randomised controlled trials.

36  
37 Most reviews in this category explored substituting medical for appropriately trained  
38  
39 nursing care (n=27, 34%), or extending the scope of pharmacists' practice beyond  
40  
41 dispensing services to provision of assessments, diagnosis and education (n=23, 29%). A  
42  
43  
44  
45  
46  
47  
48  
49  
50  
51  
52  
53  
54  
55  
56  
57  
58  
59  
60

1  
2  
3 small number of reviews also looked at self-management versus usual care, with a large  
4  
5 focus on management of chronic conditions.  
6  
7

8  
9 Many of the reviews did not focus on a specific health condition (n=17, 21%) but were  
10  
11 focused on changes to workforce roles regardless of condition (Supplementary file 3). For  
12  
13 those that did focus on a specific health condition, the largest number was concerned with  
14  
15 role expansion to care for patients with different types of chronic disease or multimorbidity  
16  
17 (n=8, 10%). There was one Cochrane review with no included studies on advanced trauma  
18  
19 life support training and role expansion of hospital health professionals and ambulance  
20  
21 crews on patient mortality and morbidity.  
22  
23  
24  
25

#### 26 27 **4. Co-ordination of care and management of care processes** 28

29  
30 There were 122 systematic reviews included in this category, 28 (23%) were Cochrane  
31  
32 reviews and 52 (43%) were published in 2016-2017. Of 2554 primary studies in this  
33  
34 category, 1619 (63%) were randomised controlled trials.  
35  
36  
37

38  
39 The delivery arrangements in this category included transition care arrangements (e.g.,  
40  
41 hospital to home, from primary to specialist care, or from paediatric to adult services),  
42  
43 integrated care models for a range of chronic and complex diseases, early supported  
44  
45 discharge to home (e.g., for mild to moderate stroke or COPD) and multidisciplinary or  
46  
47 interdisciplinary care teams for specific diseases or conditions (e.g., geriatric consultation  
48  
49 teams in acute hospitals, collaborative care for depression and anxiety). Other delivery  
50  
51 arrangements were care pathways (e.g., critical care pathways for head and neck cancer  
52  
53 surgery), disease management for a range of conditions (e.g., prenatal, dementia and  
54  
55 mental illness, intellectual disability), and case management (e.g., intensive case  
56  
57  
58  
59  
60



1  
2  
3 management for heart failure, severe mental health, adults with medical illness and  
4 complex care needs) (Table 2).  
5  
6  
7

8  
9 Several reviews in this category did not focus on a particular health condition (n=17, 14%)  
10 however a few focused on co-ordination of care in cancer (n=9, 7%), diabetes (n=8, 7%),  
11 maternal and child health (n=8, 7%), cardiovascular disease (n=6, 5%), mental health (n=6,  
12 5%) and for the terminally ill (n=6, 5%) (Supplementary file 3). We identified two empty  
13 reviews in this category. One focused on service responses for people with intellectual  
14 disabilities and epilepsy, the second focused on specialist teams for neonatal transport to  
15 neonatal intensive care units.  
16  
17  
18  
19  
20  
21  
22  
23  
24  
25

## 26 27 **5. Information and communication technology systems**

28  
29  
30 There were 189 systematic reviews included in this category, 34 (18%) were Cochrane  
31 reviews and 89 (47%) were published in 2016-2017. Of 4926 primary studies in this  
32 category, 2904 (59%) were randomised controlled trials.  
33  
34  
35  
36  
37

38  
39 The largest number of reviews focused on telehealth (n=162, 86%) and included a range of  
40 interventions such as telephone counselling, telemonitoring, mobile texting or applications,  
41 and Internet-based programs (e.g., cognitive behavioural therapy) (Table 2). A smaller  
42 number of reviews investigated health information systems (n=13, 7%) (e.g., paediatric track  
43 and trigger systems for hospitalized children), the use of ICT (n=13, 7%) (e.g., ICT  
44 interventions for reducing inappropriate imaging and testing) and smart home technology  
45 (n=1, 0.5%) (e.g., remote monitoring of patients discharged from hospital with heart failure).  
46  
47  
48  
49  
50  
51  
52  
53  
54  
55

56  
57 The majority of reviews in this category focused on changes to information and  
58 communication technology systems for delivering mental health care (n=44, 23%), while 39  
59  
60

1  
2  
3 (21%) focused on delivery of lifestyle changes and preventative strategies for health (n=39,  
4  
5  
6 21%) (Supplementary file 3). There were two empty Cochrane reviews in this category. The  
7  
8 first focused on the use of email for communicating results of diagnostic medical  
9  
10 investigations to patients, the second focused on telerehabilitation for people with low  
11  
12 vision.  
13

## 14 15 16 **6. Goal-focused reviews** 17

18  
19  
20 There were 38 systematic reviews included in this category, including 7 (18%) Cochrane  
21  
22 reviews and 15 (39%) published in 2016-2017. Of 1255 primary studies in this category, 869  
23  
24 (6%) were randomised controlled trials. A number of these reviews investigated  
25  
26 interventions designed to address health disparities and social determinants of health (14  
27  
28 reviews). These covered a wide range of interventions, some targeting particular  
29  
30 populations (e.g., for improving access for the homeless to primary care) while others  
31  
32 focused on any intervention to reduce health disparities amongst racial and ethnic minority  
33  
34 populations (e.g., community coalition-driven interventions, and cultural adaptations of  
35  
36 interventions to change behavior). A further 13 reviews investigated strategies to improve  
37  
38 medication or treatment adherence, some targeting particular conditions (e.g., pharmacy  
39  
40 care and brief messaging to improve medication adherence in type 2 diabetes), other  
41  
42 targeting particular medications (e.g., lipid lowering medications).  
43  
44  
45  
46  
47  
48  
49

## 50 **Resource use outcomes and inclusion of economic evaluation studies** 51

52  
53 Figure 3 provides a summary of included reviews published by year (excluding 2017 as the  
54  
55 search of the available literature was not conducted for the full 2017 calendar year)  
56  
57 including (i) number of reviews which specified cost as an outcome of interest or aimed to  
58  
59  
60

1  
2  
3 include economic evaluations, and (ii) number of reviews that included at least one primary  
4 study reporting on costs or economic evaluation. A total of 177 (32%) reviews included costs  
5 and/or economic analysis as an outcome of interest, with only 124 reporting at least one  
6 primary study including one of these economic outcomes. Resource use (including  
7 healthcare resources e.g. length of stay or number of visits to provider, non-healthcare  
8 resources e.g., transportation costs, patient and caregiver time) were collected in 161 (30%)  
9 of reviews (Table 1).

### 20 21 **Gaps in availability of up-to-date reviews**

22  
23  
24 Table 3 provides a summary of identified gaps in the availability of up-to-date systematic  
25 reviews of alternative delivery arrangements relevant to high-income countries. More than  
26 half of all included reviews were published prior to 2016 suggesting that updates may be  
27 needed for many reviews across the categories of the taxonomy. For example, 66% of  
28 reviews investigating changes to *how and when care is delivered* were published prior to  
29 2016; only seven reviews on triage, group versus individual care or queuing strategies  
30 published since 2016 were found. 58% of reviews investigating changes to *where care is*  
31 *provided and changes to the healthcare environment* were published prior to 2016; only two  
32 reviews focused on changes to the physical or sensory healthcare environment or outreach  
33 services and were published in 2016 or later, and two reviews examining changes to the size  
34 of healthcare organisations or transportation services are out-of-date (i.e. published prior to  
35 2016). 59% of reviews investigating changes in *who provides care and how the healthcare*  
36 *workforce is managed* were published prior to 2016 and no reviews investigating changes to  
37 the length of consultations, staffing models or movement of health workers between public  
38 and private care were identified. 54% of reviews investigating changes in how healthcare  
39  
40  
41  
42  
43  
44  
45  
46  
47  
48  
49  
50  
51  
52  
53  
54  
55  
56  
57  
58  
59  
60

1  
2  
3 workers interact with each other and/or patients (i.e., *co-ordination of care and*  
4 *management of care processes*) were published prior to 2016 and only one (out-of-date)  
5  
6 review focused on packages of care. 53% of reviews investigating changes in *ICT services*  
7  
8 were published prior to 2016 with only one review on smart home technologies published in  
9  
10  
11  
12  
13 2016 identified.

## 14 15 16 **Discussion**

17  
18  
19  
20 This scoping review describes the extent, range and nature of synthesised evidence of  
21  
22 alternative models of healthcare delivery relevant to high-income countries published in the  
23  
24 past five years. It identified 531 reviews of interventions that involved changes to how and  
25  
26 when care is delivered (47 reviews); where care is provided and changes to the healthcare  
27  
28 environment (55 reviews); who provides care and how the healthcare workforce is managed  
29  
30 (80 reviews); co-ordination of care and management of care processes (122 reviews); ICT  
31  
32 systems (189 reviews); and reviews of interventions addressing a goal-focused question (38  
33  
34 reviews).  
35  
36  
37  
38  
39

40 We identified variability in the distribution of systematic reviews across the categories of  
41  
42 the Cochrane EPOC taxonomy for delivery arrangement interventions – some interventions,  
43  
44 such as telehealth and role expansion or substitution, received substantially more attention  
45  
46 than others. There were a number of delivery arrangement categories with few published  
47  
48 systematic reviews, such as provision of care in a group instead of as an individual, use of  
49  
50 triage systems for managing healthcare delivery, changes to the size of healthcare  
51  
52 organisations or length of consultations, use of packages of care, or smart home  
53  
54 technologies. Since the aim of this scoping review was not to examine the extent, range and  
55  
56 nature of primary research in this area, it is unclear whether the limited number of reviews  
57  
58  
59  
60

1  
2  
3 on these topics is due to few primary studies or other factors. Exploring the need for, and  
4  
5 addressing the gaps in, up-to-date reviews of alternative delivery arrangements highlighted  
6  
7  
8 by our review could be the focus of future work.  
9

10  
11 Technological advances over the past decade has seen a rapidly changing healthcare  
12  
13 landscape that likely explains the large number of reviews we found in the telehealth sub-  
14  
15 category. The intense interest in technology belies the barriers associated with their uptake  
16  
17 and use, including the upfront and ongoing financial investment in equipment, licensing and  
18  
19 software required [22], real or perceived privacy risks, and funding systems that do not  
20  
21 always support the delivery of healthcare in this way [23]. They are advocated as having  
22  
23 potential to enhance care delivery, with the promise of improved capacity for patients to be  
24  
25 cared for at home, and improved access for those living rurally or remotely.  
26  
27  
28  
29  
30

31  
32 Over the past 10 years there has also been a proliferation of policy decisions both in  
33  
34 Australia and elsewhere that have encouraged the development of new or expanded  
35  
36 workforce roles to address human resource shortages[24-27]. The large number of  
37  
38 systematic reviews in this subcategory likely reflects the extensive investment in this area  
39  
40 over this time. In addition, there may be other drivers of role expansion for specific health  
41  
42 workers e.g. with changes to legislation around supply of pharmaceuticals, and a growth in  
43  
44 'supermarket pharmacies', there is greater potential for pharmacists to take on additional  
45  
46 non-dispensing roles.  
47  
48  
49  
50

51  
52 While almost all included reviews reported on patient outcomes, only a third of reviews  
53  
54 included resource use as an outcome and/or searched for an incorporated economic  
55  
56 evaluation studies. Evidence about the economic impact of changes to the way in which  
57  
58 healthcare services are organised and delivered is likely to become increasingly important to  
59  
60

1  
2  
3 those making decisions about system redesign and improvement. Therefore it is important  
4  
5 that the impact of alternative delivery arrangement interventions on these outcomes be  
6  
7 considered in future reviews.  
8  
9

10  
11 There are a number of strengths and limitations to this scoping review. Two authors  
12  
13 independently screened and selected reviews, thus minimising the likelihood of omitting  
14  
15 eligible reviews. While independent data extraction of by two review authors was not  
16  
17 feasible due to the large number of included reviews (and is not recommended in methods  
18  
19 guidance for scoping reviews [18]), we did take steps to optimise consistency in data  
20  
21 extraction[16]. As this scoping review sought to map the state of the literature in this area,  
22  
23 we did not appraise the quality of the included reviews and did not attempt to synthesise  
24  
25 the results of the included systematic reviews. The search was limited to the last five years  
26  
27 and only abstracts published on PDQ-Evidence and filtered by the 'intervention' category  
28  
29 were included. We used the Cochrane EPOC taxonomy for delivery arrangement  
30  
31 interventions to map the extent, range and nature of systematic review evidence about  
32  
33 alternative models of care delivery but categorisation was not always straightforward. This  
34  
35 was because interventions could sometimes be categorised to more than one category (e.g.  
36  
37 information technology used to improve coordination of care). In these instances the review  
38  
39 team discussed the categorisation of reviews and an audit trail of this process was prepared  
40  
41 (Supplementary file 2).  
42  
43  
44  
45  
46  
47  
48  
49

50  
51 Finally, this review focused on changes in how, when and where healthcare is organised and  
52  
53 delivered, and who delivers care and thus excluded consideration of alternatives focused on  
54  
55 changes to financial arrangements (e.g. changes to how funds are collected, insurance  
56  
57 schemes, purchasing of services, use of incentives/disincentives), governance arrangements  
58  
59  
60

1  
2  
3 (changes in rules or processes that determine authority and accountability), and  
4  
5 implementation strategies (aimed at bringing about changes in behaviour of healthcare  
6  
7 professionals or organisations). Mapping the synthesised evidence focused on these  
8  
9 interventions relevant to high-income countries could be described in future scoping  
10  
11 reviews.  
12  
13  
14  
15

## 16 **CONCLUSION**

17  
18  
19  
20 A substantial body of evidence about the effects of a wide range of delivery arrangements is  
21  
22 available to inform health system improvements. Most of the available evidence focuses on  
23  
24 alternative information and communication technology systems and care coordination  
25  
26 models. This scoping review provides a map of the extent, range and nature of available  
27  
28 synthesised evidence and identifies gaps where research efforts could be directed, i.e. in  
29  
30 updating out-of-date reviews or conducting reviews where no reviews currently exist.  
31  
32  
33  
34

## 35 **CONFLICTS OF INTEREST**

36  
37  
38  
39 None to declare.  
40  
41

## 42 **FUNDING**

43  
44  
45 This work was supported by an NHMRC Partnership Centre for Health System Sustainability  
46  
47 (Grant ID: 9100002). Along with the NHMRC, the funding partners in this research  
48  
49 collaboration are: BUPA Health Foundation; NSW Health; Department of Health, Western  
50  
51 Australia; and The University of Notre Dame Australia. RB is funded by an NHMRC Senior  
52  
53 Principal Research Fellowship (#APP1082138). Denise O'Connor is supported by a NHMRC  
54  
55 Translating Research into Practice Fellowship (APP1168749).  
56  
57  
58  
59  
60

## **AUTHORS' CONTRIBUTIONS**

The study conception and overall design was conceived by RB and DAO. RLJ, DAO and PP designed the data extraction tool and RLJ, PP, KR and JN all assisted in piloting. RLJ wrote the first draft of this protocol and RB, DAO, PP, KR, JN, SC and SS critically reviewed the manuscript, contributed improvements and approved the final version.

## **PATIENT AND PUBLIC INVOLVEMENT**

No patient involved.

## **DATA STATEMENT**

All data is presented in the manuscript and supplementary material.



**Table 1 Review characteristics**

| <b>Review characteristics (n=531)</b>                                                                                                                           | <b>Count (%)</b> |
|-----------------------------------------------------------------------------------------------------------------------------------------------------------------|------------------|
| Year of publication                                                                                                                                             |                  |
| 2012                                                                                                                                                            | 50 (9%)          |
| 2013                                                                                                                                                            | 79 (15%)         |
| 2014                                                                                                                                                            | 67 (12.5%)       |
| 2015                                                                                                                                                            | 111 (21%)        |
| 2016                                                                                                                                                            | 216 (41%)        |
| 2017*                                                                                                                                                           | 8 (1.5%)         |
| Cochrane reviews                                                                                                                                                | 125 (24%)        |
| Included primary studies (all designs) per review (Mean (SD)) [range]                                                                                           | 23 (37) [0-463]  |
| Reviews including randomised controlled trials                                                                                                                  | 245 (46%)        |
| Health conditions/ populations                                                                                                                                  |                  |
| Common chronic diseases<br>(e.g. diabetes, chronic obstructive pulmonary disease, heart failure,<br>chronic kidney failure, asthma, musculoskeletal conditions) | 106 (20%)        |
| Cancer                                                                                                                                                          | 21 (4%)          |
| Critically or terminally ill                                                                                                                                    | 16 (3%)          |
| Patients undergoing lifestyle and prevention interventions                                                                                                      | 53 (10%)         |
| Patients undergoing surgical interventions (including preoperative<br>care and safety checklists)                                                               | 18 (3%)          |
| Mental Health conditions                                                                                                                                        | 67 (12%)         |
| Older adults and aged care                                                                                                                                      | 17 (3%)          |
| Non-communicable diseases (e.g., viral hepatitis, HIV, TB)                                                                                                      | 17 (3%)          |
| Maternal and child health                                                                                                                                       | 38 (7%)          |
| Outcomes reported                                                                                                                                               |                  |
| Patient outcomes (health status and/or health behaviours e.g.,<br>mortality, morbidity, cure rates)                                                             | 492 (93%)        |
| Quality of care (e.g. adherence to recommended practice)                                                                                                        | 62 (12%)         |
| Access and/or utilisation of healthcare services (e.g., waiting time to<br>receive care, readmission rates, length of stay in a facility)                       | 178 (34%)        |
| Resource use (including healthcare resources, non-healthcare<br>resources e.g., transportation costs, patient and caregiver time)                               | 161 (30%)        |
| Impacts on equity                                                                                                                                               | 30 (6%)          |
| Social outcomes (e.g., poverty, unemployment)                                                                                                                   | 15 (3%)          |
| Healthcare provider outcomes (e.g., wellbeing, fatigue, stress,<br>satisfaction)                                                                                | 68 (13%)         |
| Adverse effects                                                                                                                                                 | 93 (18%)         |
| Reviews incorporating economic evaluation studies                                                                                                               | 177 (33%)        |

\*Incomplete

**Table 2: Summary of included reviews organised according to the Cochrane EPOC Taxonomy of delivery arrangement interventions**

| Delivery arrangement by EPOC Taxonomy category and subcategory                 | EPOC Definition                                                                                                                                                            | No of reviews (no. of Cochrane reviews) | No of primary studies (RCTs) | No of empty reviews | Types of interventions (see Supplementary file 2 for detail)                                                                                                                                                                                                                                                                                                                                                                                                                                                                                                                                                                                                                                                                                                                                                                                                                                                                                                                             |
|--------------------------------------------------------------------------------|----------------------------------------------------------------------------------------------------------------------------------------------------------------------------|-----------------------------------------|------------------------------|---------------------|------------------------------------------------------------------------------------------------------------------------------------------------------------------------------------------------------------------------------------------------------------------------------------------------------------------------------------------------------------------------------------------------------------------------------------------------------------------------------------------------------------------------------------------------------------------------------------------------------------------------------------------------------------------------------------------------------------------------------------------------------------------------------------------------------------------------------------------------------------------------------------------------------------------------------------------------------------------------------------------|
| <b>How and when care is delivered (n= 47)</b>                                  |                                                                                                                                                                            |                                         |                              |                     |                                                                                                                                                                                                                                                                                                                                                                                                                                                                                                                                                                                                                                                                                                                                                                                                                                                                                                                                                                                          |
| Queuing strategies                                                             | A reduction or increase in time to access a healthcare intervention, for example managed waiting lists, managing ER wait time                                              | 7 (2)                                   | 112 (22)                     | 1                   | <ul style="list-style-type: none"> <li>- Emergency department (ED) visit reduction programs</li> <li>- Improving patient flow and quality of care in the ED</li> <li>- Interventions to reduce waiting times for elective surgical procedures</li> <li>- Patient initiated clinics for patients with chronic or recurrent conditions managed in secondary care</li> </ul>                                                                                                                                                                                                                                                                                                                                                                                                                                                                                                                                                                                                                |
| Group versus individual care                                                   | Providing care to groups versus individual patients                                                                                                                        | 5 (1)                                   | 134 (124)                    | 0                   | <ul style="list-style-type: none"> <li>- Group clinics (chronic conditions, antenatal care)</li> </ul>                                                                                                                                                                                                                                                                                                                                                                                                                                                                                                                                                                                                                                                                                                                                                                                                                                                                                   |
| Quality and safety systems                                                     | Essential standards for quality of healthcare, and reduction of poor outcomes related to unsafe healthcare                                                                 | 33 (11)                                 | 774 (246)                    | 0                   | <ul style="list-style-type: none"> <li>- Immediate versus deferred delivery of the preterm baby with suspected foetal compromise for improving outcomes</li> <li>- Implementation of guidelines and evidence-based care</li> <li>- Improving integrated care models in chronic diseases</li> <li>- Interventions to increase breastfeeding uptake</li> <li>- Medication reconciliation interventions at hospital</li> <li>- Patient safety interventions</li> <li>- Promoting hand hygiene</li> <li>- Promoting use of guidelines and evidence-based medicine</li> <li>- Reducing disparities in health and health care</li> <li>- Reducing exposure to ionizing radiation from medical imaging</li> <li>- Reducing medication over-prescription (antibiotic use, opioid prescription, administration errors in children and adults, inappropriate prescribing in elderly)</li> <li>- Using interpreters for non-English speakers on the delivery of palliative care (cancer)</li> </ul> |
| Triage                                                                         | Management of patients attending a healthcare facility, or contacting a healthcare professional by phone, and receiving advice or being referral to an appropriate service | 2 (0)                                   | 65 (2)                       | 0                   | <ul style="list-style-type: none"> <li>- Improving patient flow and quality of care in the ED</li> <li>- Pharmacist involvement in care for patients with chronic disease</li> </ul>                                                                                                                                                                                                                                                                                                                                                                                                                                                                                                                                                                                                                                                                                                                                                                                                     |
| <b>Where care is provided and changes to the healthcare environment (n=55)</b> |                                                                                                                                                                            |                                         |                              |                     |                                                                                                                                                                                                                                                                                                                                                                                                                                                                                                                                                                                                                                                                                                                                                                                                                                                                                                                                                                                          |
| Environment                                                                    | Changes to the physical or sensory healthcare environment, by adding or altering equipment or layout, providing music, art                                                 | 1 (1)                                   | 1 (1)                        | 0                   | <ul style="list-style-type: none"> <li>- Environmental interventions to increase breastfeeding uptake while mothers are in hospital</li> </ul>                                                                                                                                                                                                                                                                                                                                                                                                                                                                                                                                                                                                                                                                                                                                                                                                                                           |
| Outreach services                                                              | Visits by health workers to different locations, for example involving specialists, generalists, mobile units                                                              | 1 (1)                                   | 2 (2)                        | 0                   | <ul style="list-style-type: none"> <li>- Mobile clinics for women's and children's health</li> </ul>                                                                                                                                                                                                                                                                                                                                                                                                                                                                                                                                                                                                                                                                                                                                                                                                                                                                                     |
| Site of service delivery                                                       | Changes in where care is provided, for example home vs. healthcare facility, inpatient vs outpatient,                                                                      | 51 (20)                                 | 956 (320)                    | 1                   | <ul style="list-style-type: none"> <li>- Alternatives to hospitalisations: outpatient management, quick diagnostic units, hospital-at-home, observation units (for induction of labour,</li> </ul>                                                                                                                                                                                                                                                                                                                                                                                                                                                                                                                                                                                                                                                                                                                                                                                       |

1  
2  
3  
4  
5  
6  
7  
8  
9  
10

| Delivery arrangement by EPOC Taxonomy category and subcategory        | EPOC Definition                                                                                                                                                      | No of reviews (no. of Cochrane reviews) | No of primary studies (RCTs) | No of empty reviews | Types of interventions (see Supplementary file 2 for detail)                                                                                                                                                                                                                                                                                                                                                                                                                                                                                                                                                                                                                                                                                                                                                                                         |
|-----------------------------------------------------------------------|----------------------------------------------------------------------------------------------------------------------------------------------------------------------|-----------------------------------------|------------------------------|---------------------|------------------------------------------------------------------------------------------------------------------------------------------------------------------------------------------------------------------------------------------------------------------------------------------------------------------------------------------------------------------------------------------------------------------------------------------------------------------------------------------------------------------------------------------------------------------------------------------------------------------------------------------------------------------------------------------------------------------------------------------------------------------------------------------------------------------------------------------------------|
|                                                                       | specialised vs. non-specialised facility, walk in clinics, medical day hospital, mobile units                                                                        |                                         |                              |                     | <ul style="list-style-type: none"> <li>intravenous antibiotic therapy for cystic fibrosis, cardiac arrest, kidney dialysis, COPD, psychosis, paediatric care.)</li> <li>- ED-based interventions (for managing alcohol misuse, domestic violence, palliative care)</li> <li>- Home visiting (for pregnancy, child health and maltreatment, social determinants of health, partner violence)</li> <li>- Home-based prevention and rehabilitation</li> <li>- The patient centred medical home</li> <li>- Pre-hospital intervention for sepsis</li> <li>- Reaching youth with out-of-facility services (HIV and reproductive health)</li> <li>- School-based health centres for mental health, social determinants of health</li> <li>- Therapeutic communities for mental health</li> <li>- Waiting room-based interventions to prevent STD</li> </ul> |
| Size of organisations                                                 | Increasing or decreasing the size of health service provider units                                                                                                   | 1 (1)                                   | 5 (0)                        | 0                   | - Centralisation, specialisation and increasing volume of services to promote quality (e.g. cancer care and surgery)                                                                                                                                                                                                                                                                                                                                                                                                                                                                                                                                                                                                                                                                                                                                 |
| Transportation services                                               | Arrangements for transporting patients from one site to another                                                                                                      | 1 (1)                                   | 38 (0)                       | 0                   | - Helicopter emergency medical services for adults with major trauma                                                                                                                                                                                                                                                                                                                                                                                                                                                                                                                                                                                                                                                                                                                                                                                 |
| <b>Who provides care and how the workforce is managed (n= 80)</b>     |                                                                                                                                                                      |                                         |                              |                     |                                                                                                                                                                                                                                                                                                                                                                                                                                                                                                                                                                                                                                                                                                                                                                                                                                                      |
| Role expansion or task shifting                                       | Expanding tasks undertaken by a cadre of health workers or shifting tasks from one cadre to another, to include tasks not previously part of their scope of practice | 65 (12)                                 | 1110 (586)                   | 1                   | <ul style="list-style-type: none"> <li>- Advanced practice nursing in older people and in long-term care</li> <li>- Advanced trauma life support training for hospital health professional and ambulance crews</li> <li>- Carer involvement in cognition-based interventions for people with dementia</li> <li>- Community-based health worker interventions</li> <li>- Interventions to increase breastfeeding</li> <li>- Nurse-physician substitution</li> <li>- Peer-led interventions (e.g., in mental health)</li> <li>- Pharmacist involvement in care for patients with chronic conditions</li> <li>- Primary care-led provision of care (e.g., GP's working in ED)</li> <li>- Radiographers in advanced roles</li> </ul>                                                                                                                     |
| Self-management                                                       | Shifting or promoting the responsibility for healthcare or disease management to patients or their families                                                          | 15 (6)                                  | 298 (216)                    | 0                   | <ul style="list-style-type: none"> <li>- Patient navigation (breast cancer)</li> <li>- Promoting self-management (in chronic diseases, specifically HIV, diabetes foot care, COPD, asthma, children with epilepsy, anxiety, MS, IBS; self-administration of medication in the hospital, oral anticoagulation, home uterine monitoring for detecting preterm labour)</li> <li>- Reducing medication and over-prescription (antibiotic use, opioid prescription, administration errors in children and adults, inappropriate prescribing in elderly)</li> </ul>                                                                                                                                                                                                                                                                                        |
| <b>Co-ordination of care and management of care processes (n=122)</b> |                                                                                                                                                                      |                                         |                              |                     |                                                                                                                                                                                                                                                                                                                                                                                                                                                                                                                                                                                                                                                                                                                                                                                                                                                      |
| Integrated healthcare systems                                         | Consolidating the provision of different healthcare services to one (or simply fewer) facilities                                                                     | 16 (3)                                  | 406 (258)                    | 0                   | - Integrated care models for various conditions                                                                                                                                                                                                                                                                                                                                                                                                                                                                                                                                                                                                                                                                                                                                                                                                      |
| Shared                                                                | Sharing healthcare decision making                                                                                                                                   | 14 (5)                                  | 487 (393)                    | 0                   | - Educational interventions for patients and carers                                                                                                                                                                                                                                                                                                                                                                                                                                                                                                                                                                                                                                                                                                                                                                                                  |

| Delivery arrangement by EPOC Taxonomy category and subcategory | EPOC Definition                                                                                                                                                                                        | No of reviews (no. of Cochrane reviews) | No of primary studies (RCTs) | No of empty reviews | Types of interventions (see Supplementary file 2 for detail)                                                                                                                                                                                                                                                                                                                                                                                                                                                                                                                                             |
|----------------------------------------------------------------|--------------------------------------------------------------------------------------------------------------------------------------------------------------------------------------------------------|-----------------------------------------|------------------------------|---------------------|----------------------------------------------------------------------------------------------------------------------------------------------------------------------------------------------------------------------------------------------------------------------------------------------------------------------------------------------------------------------------------------------------------------------------------------------------------------------------------------------------------------------------------------------------------------------------------------------------------|
| decision making                                                | responsibilities among different individuals, potentially including the patient.                                                                                                                       |                                         |                              |                     | <ul style="list-style-type: none"> <li>- Improving healthcare professionals skills (e.g. communication in cancer, performance in nursing homes, recognition and management of deteriorating patients, genetic education)</li> <li>- Promoting adoption of Shared Decision Making</li> <li>- Reducing medication and over prescription</li> <li>- Shared decision making in pregnancy and delivery, treatment in older people and cancer screening</li> </ul>                                                                                                                                             |
| Packages of care                                               | Introduction, modification, or removal of packages of services designed to be implemented together for a particular diagnosis/disease, e.g. tuberculosis management guidelines, newborn care protocols | 1 (1)                                   | 5 (5)                        | 0                   | <ul style="list-style-type: none"> <li>- Care delivery models/disease management</li> </ul>                                                                                                                                                                                                                                                                                                                                                                                                                                                                                                              |
| Case management                                                | Introduction, modification or removal of strategies to improve the coordination and continuity of delivery of services i.e. improving the management of one "case" (patient)                           | 14 (4)                                  | 375 (260)                    | 0                   | <ul style="list-style-type: none"> <li>- Advance care planning (e.g., haemodialysis patients, palliative care, end-of-life interventions)</li> <li>- Case management in chronic diseases, specifically CVD, diabetes type 2, cancer, childhood obesity, haemophilia, mental health, multi-morbidities, chronic viral hepatitis</li> <li>- Outpatient case management</li> </ul>                                                                                                                                                                                                                          |
| Disease management                                             | Programs designed to manage or prevent a chronic condition using a systematic approach to care and potentially employing multiple ways of influencing patients, providers or the process of care       | 16 (3)                                  | 298 (169)                    | 1                   | <ul style="list-style-type: none"> <li>- Adolescent-specific prenatal interventions on improving attendance and reducing harm during and after birth</li> <li>- Care delivery models/disease management</li> <li>- Chronic Disease Management – asthma</li> <li>- Improving healthcare professionals skills</li> <li>- Outpatient management of cardio-metabolic risk factor control in people with diabetes</li> </ul>                                                                                                                                                                                  |
| Care pathways                                                  | Aim to link evidence to practice for specific health conditions and local arrangements for delivering care.                                                                                            | 8 (2)                                   | 99 (24)                      | 0                   | <ul style="list-style-type: none"> <li>- Advanced care planning</li> <li>- Care delivery models/disease management</li> <li>- Critical Care</li> <li>- Interventions to improve linkage with or retention in HIV services</li> <li>- Rapid response systems to reduce hospital mortality</li> </ul>                                                                                                                                                                                                                                                                                                      |
| Teams                                                          | Creating and delivering care through a multidisciplinary team of healthcare workers.                                                                                                                   | 22 (4)                                  | 398 (229)                    | 1                   | <ul style="list-style-type: none"> <li>- Multidisciplinary team care for dementia and other mental health conditions, older adults, epilepsy, asthma, HIV, heart failure, chronic cough in children, antenatal care., chronic diseases management, specifically CVD, diabetes type 2, cancer, childhood obesity, haemophilia, multi-morbidities, chronic viral hepatitis.</li> <li>- Team interventions to promote work participation in people with regional musculoskeletal pain</li> <li>- Multidisciplinary team care in. chronic disease</li> <li>- Multidisciplinary team neonatal care</li> </ul> |
| Communication between providers                                | Systems or strategies for improving the communication between health care providers                                                                                                                    | 6 (2)                                   | 105 (44)                     | 0                   | <ul style="list-style-type: none"> <li>- Improving clinical communication in hospitals, between primary and secondary care</li> <li>- Improving patient handovers from hospital to primary care and vice versa</li> </ul>                                                                                                                                                                                                                                                                                                                                                                                |
| Transition of care                                             | Interventions to improve transition from one care provider to another                                                                                                                                  | 7 (0)                                   | 138 (26)                     | 0                   | <ul style="list-style-type: none"> <li>- Transition from paediatric to adult care settings or services</li> </ul>                                                                                                                                                                                                                                                                                                                                                                                                                                                                                        |
| Discharge planning                                             | An individualised plan of discharge to facilitate the transfer of a patient                                                                                                                            | 18 (4)                                  | 243 (211)                    | 0                   | <ul style="list-style-type: none"> <li>- Early supported discharge planning (acute stroke, COPD, older adults, children with cancer and</li> </ul>                                                                                                                                                                                                                                                                                                                                                                                                                                                       |

| Delivery arrangement by EPOC Taxonomy category and subcategory  | EPOC Definition                                                                                                                                                                                   | No of reviews (no. of Cochrane reviews) | No of primary studies (RCTs) | No of empty reviews | Types of interventions (see Supplementary file 2 for detail)                                                                                                                                                                                                                                                                                                                                                                                                                                                                                                                                                                                                                 |
|-----------------------------------------------------------------|---------------------------------------------------------------------------------------------------------------------------------------------------------------------------------------------------|-----------------------------------------|------------------------------|---------------------|------------------------------------------------------------------------------------------------------------------------------------------------------------------------------------------------------------------------------------------------------------------------------------------------------------------------------------------------------------------------------------------------------------------------------------------------------------------------------------------------------------------------------------------------------------------------------------------------------------------------------------------------------------------------------|
|                                                                 | from hospital to a post-discharge setting                                                                                                                                                         |                                         |                              |                     | febrile neutropenia)<br>- Fast-track surgery programs (liver surgery)<br>- Providing written information to reduce re-admissions in heart failure<br>- Transitional care management after hospital discharge to reduce 30-day readmission rates                                                                                                                                                                                                                                                                                                                                                                                                                              |
| <b>Information and communication technology systems (n=189)</b> |                                                                                                                                                                                                   |                                         |                              |                     |                                                                                                                                                                                                                                                                                                                                                                                                                                                                                                                                                                                                                                                                              |
| Health information systems                                      | Health record and health management systems to store and manage patient health information, for example electronic patient records, or systems for recalling patients for follow-up or prevention | 13 (4)                                  | 718 (118)                    | 0                   | - Health notes vs EMR in pregnancy<br>- Interventions to improve attendance of appointments<br>- Paediatric track and trigger systems for hospitalised children<br>- Patient safety interventions that use technology<br>- Recall intervals (for dental visits, women with history of gestational diabetes, TB appointments)<br>- Reminder interventions to improve treatment adherence<br>- The use of medical scribes in healthcare settings                                                                                                                                                                                                                               |
| The use of information and communication technology             | Technology-based methods to transfer healthcare information and support the delivery of care                                                                                                      | 13 (1)                                  | 627 (250)                    | 0                   | - Computerised clinical decision support to enable patient-centred care (nutrition informatics, advice on drug dosage)<br>- Medication organization devices<br>- Medication reconciliation interventions in hospital<br>- Multimedia educational interventions for consumers about prescribed and over-the-counter medications<br>- Patient portals<br>- IT interventions for reducing inappropriate imaging and testing (e.g. cardiac, low-back pain imaging, lab tests ordering by GPs)<br>- IT interventions for reducing medication use? and over-prescription<br>- Serious games for professional training and patient education (e.g. chronic diseases, mental health) |
| Smart home technologies                                         | Electronic assistive technologies                                                                                                                                                                 | 1 (0)                                   | 48 (9)                       | 0                   | - Remote monitoring (e.g. after recent hospital discharge with heart failure, in older adults, asthma)                                                                                                                                                                                                                                                                                                                                                                                                                                                                                                                                                                       |
| Telehealth                                                      | Exchange of healthcare information from one site to another via electronic communication                                                                                                          | 162 (29)                                | 3533 (2527)                  | 2                   | - Self-care applications<br>- Social networks and social media<br>- Telecoaching (telephone counselling, peer support programs, automated telephone messaging, web-based programs e.g., cognitive behavioural therapy for mental health conditions, coaching for chronic disease)<br>- Telehealth (email communication, mobile phone messaging, mobile phone technology, mobile technology, or range of intervention types)<br>- Telemedicine (screening, telerehabilitation, telemonitoring)                                                                                                                                                                                |
| <b>Goal-focused reviews (n=38)</b>                              |                                                                                                                                                                                                   |                                         |                              |                     |                                                                                                                                                                                                                                                                                                                                                                                                                                                                                                                                                                                                                                                                              |
| Interventions to address social determinants of health          |                                                                                                                                                                                                   | 14 (2)                                  | 319 (123)                    | 0                   | - Culturally appropriate prevention and care (indigenous populations, racial-ethnic minorities, low socio-economic populations)<br>- Eliminating repeat unintended pregnancy in teenagers<br>- Improving access to healthcare for homeless people<br>- Interventions to address social determinants of                                                                                                                                                                                                                                                                                                                                                                       |

| Delivery arrangement by EPOC Taxonomy category and subcategory | EPOC Definition | No of reviews (no. of Cochrane reviews) | No of primary studies (RCTs) | No of empty reviews | Types of interventions (see Supplementary file 2 for detail)                                                                           |
|----------------------------------------------------------------|-----------------|-----------------------------------------|------------------------------|---------------------|----------------------------------------------------------------------------------------------------------------------------------------|
|                                                                |                 |                                         |                              |                     | health for minority populations (ethnic and race disparities)                                                                          |
| Improving medication adherence                                 |                 | 11 (2)                                  | 654 (551)                    | 0                   | - Interventions aimed at improving medication adherence (e.g. chronic diseases, specifically diabetes, HIV, CVD; in ethnic minorities) |
| Addressing multimorbidity in primary care                      |                 | 1 (1)                                   | 18 (18)                      | 0                   | - Interventions addressing multi-morbidity in primary care                                                                             |
| Preventing readmissions                                        |                 | 1                                       | 42 (42)                      | 0                   | - Interventions for preventing unplanned 30-day hospital readmissions                                                                  |
| Reducing inappropriate imaging and testing                     |                 | 3                                       | 24 (6)                       | 0                   | - Interventions for reducing inappropriate imaging and testing                                                                         |
| Meeting family needs of the critically ill                     |                 | 1                                       | 14 (1)                       | 0                   | - Meeting family needs of critically ill patients in an ICU                                                                            |
| Communicating contraceptive effectiveness                      |                 | 1 (1)                                   | 7 (7)                        | 0                   | - Communicating contraceptive effectiveness                                                                                            |
| Improving adherence to treatment                               |                 | 2                                       | 38 (35)                      | 0                   | - Improving adherence to treatment in children with chronic diseases and adult heart transplant patients                               |
| Interventions to increase retention in health care services    |                 | 1 (1)                                   | 11 (9)                       | 0                   | - Interventions to increase retention in mental health services                                                                        |
| Interventions to increase vaccine uptake                       |                 | 3                                       | 128 (77)                     | 0                   | - Interventions to increase vaccine uptake in children and the elderly                                                                 |
| <b>Total</b>                                                   |                 | <b>531</b>                              | <b>12,230 (6911)</b>         | <b>7</b>            |                                                                                                                                        |



**Table 3. Gaps in availability of up-to-date systematic reviews of alternative delivery arrangements**

| Delivery arrangement                                                | Count (%) of out-of-date <sup>1</sup> reviews per category | Sub-categories where new or updated reviews may be needed                                                                                                                                                                                                                                                                                                                        |
|---------------------------------------------------------------------|------------------------------------------------------------|----------------------------------------------------------------------------------------------------------------------------------------------------------------------------------------------------------------------------------------------------------------------------------------------------------------------------------------------------------------------------------|
| 1. How and when care is delivered                                   | 31/47 (66%)                                                | <ul style="list-style-type: none"> <li>- Triage - only 2 reviews identified; 1 out-of-date<sup>2</sup></li> <li>- Group versus individual care - 5 reviews identified; 3 out-of-date<sup>2</sup></li> <li>- Queuing strategies - 7 reviews identified; 3 out-of-date<sup>2</sup></li> </ul>                                                                                      |
| 2. Where care is provided and changes to the healthcare environment | 32/55 (58%)                                                | <ul style="list-style-type: none"> <li>- Environment - only 1 review identified; published 2016</li> <li>- Outreach services - only 1 review identified; published 2016</li> <li>- Size of organisations - only 1 review identified; out-of-date<sup>2</sup></li> <li>- Transportation services - only 1 review identified; out-of-date<sup>2</sup></li> </ul>                   |
| 3. Who provides care and how the healthcare workforce is managed    | 48/80 (59%)                                                | <p>No reviews identified on:</p> <ul style="list-style-type: none"> <li>- Length of consultations – no reviews</li> <li>- Staffing models – no reviews</li> <li>- Movement of health workers between public and private care – no reviews</li> </ul>                                                                                                                             |
| 4. Co-ordination of care and management of care processes           | 65/122 (54%)                                               | <ul style="list-style-type: none"> <li>- Packages of care – only 1 review identified; out-of-date<sup>2</sup></li> <li>- Communication between providers - 6 reviews identified; 5 out-of-date<sup>2</sup></li> <li>- Transition of care - 7 reviews identified; 3 out-of-date<sup>2</sup></li> <li>- Care pathways - 8 reviews identified; 4 out-of-date<sup>2</sup></li> </ul> |
| 5. Information technology and communication systems                 | 100/189 (53%)                                              | <ul style="list-style-type: none"> <li>- Smart home technologies - only 1 review identified; published 2016</li> </ul>                                                                                                                                                                                                                                                           |

1. published before 2016; 2 percentage of reviews in subcategory published before 2016

## References

1. Organisation for Economic Cooperation and Development, *Fiscal sustainability of health systems: bridging health and finance perspectives*. 2015: OECD.
2. Walker, A., *Australia's ageing population*. Vol. no. 27. 1998, Canberra: National Centre for Social and Economic Modelling, University of Canberra.
3. Healey, J., *Ageing*. Vol. 277. 2008, Thirroul, N.S.W: Spinney Press.
4. Moynihan, R., I. Heath, and D. Henry, *Selling sickness: the pharmaceutical industry and disease mongering* Commentary: *Medicalisation of risk factors*. *Bmj*, 2002. **324**(7342): p. 886-891.
5. Glasziou, P., et al., *Too much medicine; too little care*. 2013, British Medical Journal Publishing Group.
6. Hansen, T.W., et al., *Diagnostic Thresholds for Ambulatory Blood Pressure Moving Lower: A Review Based on a Meta-Analysis—Clinical Implications*. *The Journal of Clinical Hypertension* 2008. **10**(5): p. 377-381.
7. Mills, N.L., et al., *Implications of lowering threshold of plasma troponin concentration in diagnosis of myocardial infarction: cohort study*. *Bmj*, 2012. **344**: p. e1533.
8. Forouhi, N., et al., *The threshold for diagnosing impaired fasting glucose: a position statement by the European Diabetes Epidemiology Group*. *Diabetologia*, 2006. **49**(5): p. 822-827.
9. Owens, D.K., et al., *High-value, cost-conscious health care: concepts for clinicians to evaluate the benefits, harms, and costs of medical interventions*. *Annals of internal medicine*, 2011. **154**(3): p. 174-180.
10. Schupbach, J. and A. Chandra, *A Simple Way to Measure Health Care Outcomes*. 2016.
11. Langhorne, P. and S. Baylan, *Early supported discharge services for people with acute stroke*. *The Cochrane Library*, 2017.
12. Martínez-González, N.A., et al., *Substitution of physicians by nurses in primary care: a systematic review and meta-analysis*. *BMC health services research*, 2014. **14**(1): p. 214.
13. Hisashige, A., *The effectiveness and efficiency of disease management programs for patients with chronic diseases*. *Global Journal of Health Science*, 2013. **5**(2): p. 27.
14. Damery, S., S. Flanagan, and G. Combes, *Does integrated care reduce hospital activity for patients with chronic diseases? An umbrella review of systematic reviews*. *BMJ open*, 2016. **6**(11): p. e011952.
15. Ciapponi A, L.S., Herrera CA, Opiyo N, Pantoja T, Paulsen E, Rada G, Wiysonge CS, Bastías G,, F.S. Dudley L, Gagnon MP, Garcia Marti S, Glenton C, Okwundu CI, Peñaloza B, Suleman F,, and O. AD, *Delivery arrangements for health systems in low-income countries: an overview of systematic reviews (Review)*. *Cochrane Database of Systematic Reviews*, 2017(9).
16. Jessup, R.L., et al., *Alternative service models for delivery of healthcare services in high-income countries: a scoping review of systematic reviews*. *BMJ open*, 2019. **9**(1): p. e024385.
17. Arksey, H. and L. O'Malley, *Scoping studies: towards a methodological framework*. *International journal of social research methodology*, 2005. **8**(1): p. 19-32.
18. Levac, D., H. Colquhoun, and K.K. O'Brien, *Scoping studies: advancing the methodology*. *Implementation science*, 2010. **5**(1): p. 69.
19. Tricco, A.C., et al., *PRISMA extension for scoping reviews (PRISMA-ScR): checklist and explanation*. *Annals of internal medicine*, 2018. **169**(7): p. 467-473.
20. Effective Practice and Organisation of Care (EPOC). *The EPOC taxonomy of health systems interventions, EPOC Resources for review authors*. . 2016 August 2018].
21. World Bank. *World Bank Country and Lending Groups*. 2017.
22. Blumenthal, D., *Stimulating the adoption of health information technology*. *New England journal of medicine*, 2009. **360**(15): p. 1477-1479.



- 1  
2  
3 23. Bradford, N., L. Caffery, and A. Smith, *Telehealth services in rural and remote Australia: a*  
4 *systematic review of models of care and factors influencing success and sustainability*. Rural  
5 and remote health, 2016. **16**(3808).  
6  
7 24. Ford, L.C., *Nurse practitioners: History of a new idea and predictions for the future*. Nursing  
8 in the 1980s: Crises, opportunities, challenges, 1982: p. 231-247.  
9  
10 25. Kersten, P., et al., *Physiotherapy extended scope of practice—who is doing what and why?*  
11 *Physiotherapy*, 2007. **93**(4): p. 235-242.  
12  
13 26. Gilmore, L.G., et al., *Skills escalator in allied health: a time for reflection and refocus*. Journal  
14 of Healthcare Leadership, 2011. **3**: p. 53-58.  
15  
16 27. Ellis, N., L. Robinson, and P.M. Brooks, *Task substitution: where to from here?* Medical  
17 Journal of Australia, 2006. **185**(1): p. 18.  
18  
19  
20  
21  
22  
23  
24  
25  
26  
27  
28  
29  
30  
31  
32  
33  
34  
35  
36  
37  
38  
39  
40  
41  
42  
43  
44  
45  
46  
47  
48  
49  
50  
51  
52  
53  
54  
55  
56  
57  
58  
59  
60

For peer review only

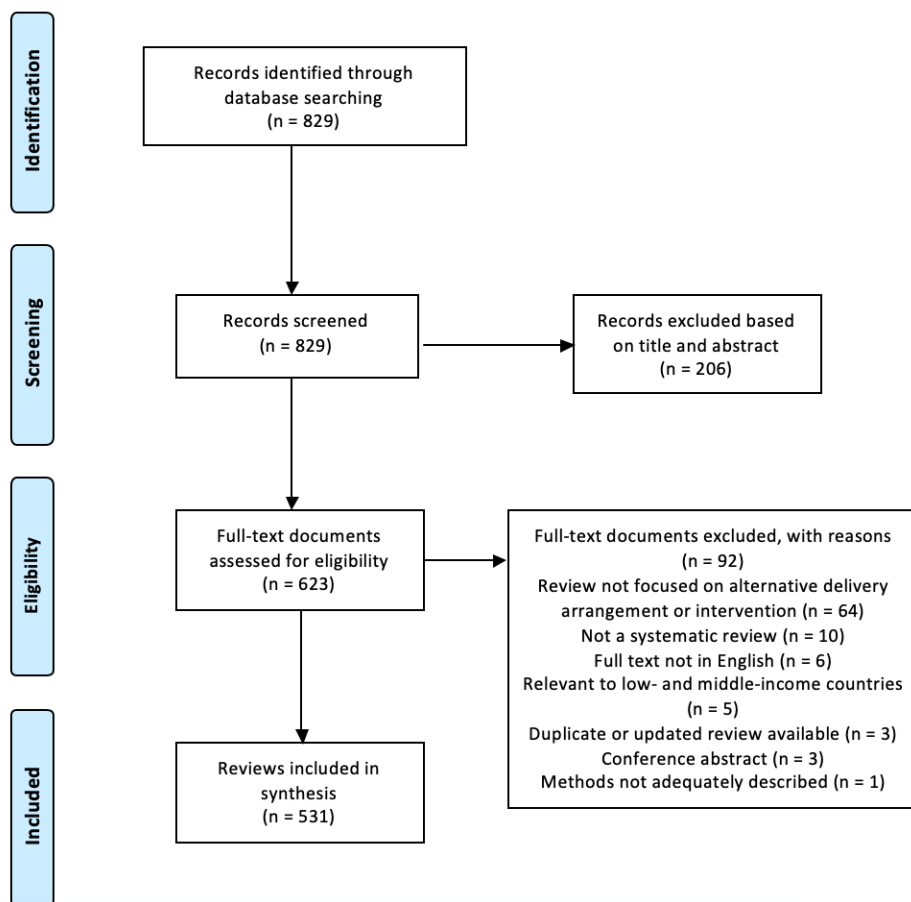

Figure 1. PRISMA Flow Diagram

1  
2  
3  
4  
5  
6  
7  
8  
9  
10  
11  
12  
13  
14  
15  
16  
17  
18  
19  
20  
21  
22  
23  
24  
25  
26  
27  
28  
29  
30  
31  
32  
33  
34  
35  
36  
37  
38  
39  
40  
41  
42  
43  
44  
45  
46  
47  
48  
49  
50  
51  
52  
53  
54  
55  
56  
57  
58  
59  
60

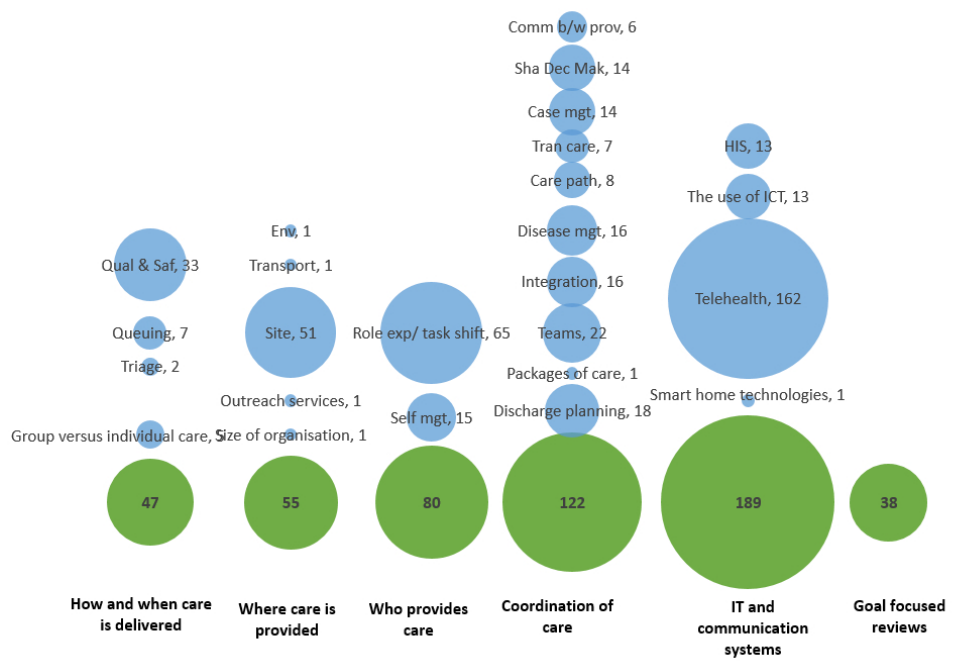

Number of included reviews organised according to the Cochrane EPOC taxonomy of delivery arrangement interventions

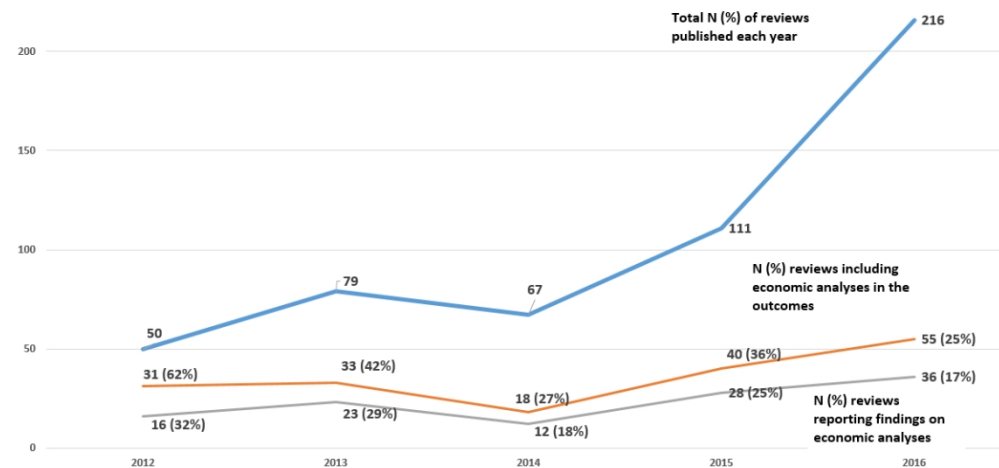

Summary of included reviews by year of publication (2012-2016) and incorporating economic analyses

# BMJ Open Alternative service models for delivery of healthcare services in high-income countries: a scoping review of systematic reviews

Rebecca L Jessup,<sup>1,2,3</sup> Denise A O'Connor,<sup>1,2</sup> Polina Putrik,<sup>1,2</sup> Kobi Rischin,<sup>1,2</sup> Janet Nezon,<sup>2</sup> Sheila Cyril,<sup>1,2</sup> Sasha Shepperd,<sup>4</sup> Rachelle Buchbinder<sup>1,2</sup>

**To cite:** Jessup RL, O'Connor DA, Putrik P, *et al.* Alternative service models for delivery of healthcare services in high-income countries: a scoping review of systematic reviews. *BMJ Open* 2019;**9**:e024385. doi:10.1136/bmjopen-2018-024385

► Prepublication history and additional material for this paper are available online. To view these files, please visit the journal online (<http://dx.doi.org/10.1136/bmjopen-2018-024385>).

RLJ and DAO'C contributed equally.

Received 24 May 2018

Revised 4 October 2018

Accepted 28 November 2018

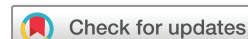

© Author(s) (or their employer(s)) 2019. Re-use permitted under CC BY-NC. No commercial re-use. See rights and permissions. Published by BMJ.

For numbered affiliations see end of article.

## Correspondence to

Dr Rebecca L Jessup;  
[rebecca.jessup@monash.edu](mailto:rebecca.jessup@monash.edu)

## ABSTRACT

**Introduction** Costs associated with the delivery of healthcare services are growing at an unsustainable rate. There is a need for health systems and healthcare providers to consider the economic impacts of the service models they deliver and to determine if alternative models may lead to improved efficiencies without compromising quality of care. The aim of this protocol is to describe a scoping review of the extent, range and nature of available synthesised research on alternative delivery arrangements for health systems relevant to high-income countries published in the last 5 years.

**Design** We will perform a scoping review of systematic reviews of trials and economic studies of alternative delivery arrangements for health systems relevant to high-income countries published on 'Pretty Darn Quick' (PDQ)-Evidence between 1 January 2012 and 20 September 2017. All English language systematic reviews will be included. The Cochrane Effective Practice and Organisation of Care taxonomy of health system interventions will be used to categorise delivery arrangements according to: how and when care is delivered, where care is provided and changes to the healthcare environment, who provides care and how the healthcare workforce is managed, co-ordination of care and management of care processes and information and communication technology systems. This work is part of a 5-year Partnership Centre for Health System Sustainability aiming to investigate and create interventions to improve health-system-performance sustainability.

**Ethics and dissemination** No primary data will be collected, so ethical approval is not required. The study findings will be published and presented at relevant conferences.

## BACKGROUND

The provision of sustainable, appropriate healthcare is an ongoing challenge for health systems worldwide. There are many drivers of increasing healthcare costs. They include growing pressure from an ageing population,<sup>1 2</sup> growth in the prevalence of chronic and preventable diseases, increasing availability of (more expensive) clinical tests and

## Strengths and limitations of this study

- A high-level synthesis of the available evidence for alternative models of health service delivery is much needed and will be a useful resource for decision makers involved in health system planning, health system performance, sustainability initiatives and future research directions.
- We have followed published methodological guidance in planning our methods for conducting this scoping review, and we will additionally perform independent double data extraction to enhance the robustness of our findings where consistency of extraction is <90%.
- The search date will be limited to the last 5 years to retrieve useful, up-to-date reviews of alternative delivery arrangements relevant to high-income countries.
- Limiting the search date to the last 5 years means it is possible that we may not capture delivery arrangements included in out-of-date systematic reviews (published prior to 2012).
- Systematic reviews that are awaiting classification in 'Pretty Darn Quick'-Evidence will not be assessed as part of this review.

treatments,<sup>3</sup> medicalisation of risk factors and active screening of people who are well,<sup>4 5</sup> lowering of diagnostic and intervention thresholds for high prevalence conditions<sup>6-8</sup> and changing community expectations.<sup>9 10</sup> In addition, high-income countries are experiencing increasing inflationary pressures and workforce shortages.<sup>11-15</sup> In order to be sustainable, health systems and providers must be able to endure and adapt to these growing pressures by delivering services that maintain a high quality of care while providing better value for money.<sup>16</sup> In practice, this means health systems and providers need to consider the effectiveness and economic impact of existing service models, and also determine if there are alternative

models that might lead to improved efficiencies without compromising the quality of care and patient outcomes.

There are examples of models of service delivery that have been adopted in practice that offer modest benefits for patients when compared with usual care, but where the economic impact is uncertain (eg, early discharge from hospital and care at home),<sup>17</sup> or not known (eg, mid-wife led models of care).<sup>18</sup> In addition, some alternative delivery arrangements have been implemented despite uncertainty about effects on patient care and economic impact (eg, primary care physicians providing care in emergency departments)<sup>19</sup> and, in some cases, effectiveness is later shown to be low and associated costs, high (eg, rapid exchange of operating room air to reduce infection rates).<sup>20</sup> For this reason, efforts that aim to manage expenditure need to focus not just on benefits to patients, but on the value of the delivery arrangement relative to the cost. This distinction is important, as high-cost models of care may still be good value if they deliver high levels of benefit to patients, while low-cost models of care may have no value if they provide little or no benefit.<sup>21</sup> In 2017, the Australian Productivity Commission released a report identifying that there are considerable efficiencies to be gained through identifying enablers and barriers to more efficient models of care, and that eliminating financial reward for delivery of services where there is clear evidence of a lack of efficacy or cost effectiveness, or where the benefits do not justify the associated costs should be part of future health planning.<sup>22</sup>

Alternative models of service delivery offer an opportunity for healthcare providers to deliver healthcare services in different and potentially more cost-effective ways through lower cost- providers, locations and formats of delivery. Examples include changing the site of the service delivery from a more expensive to a less expensive option, providing care in a group setting rather than to individuals, substituting the care that is provided by a highly trained or specialised health worker to care provided by a less specialised or lay health worker, or using technology to deliver care (eg, telemedicine). Provision of services in this way may lead to the same, and in some cases better, outcomes for patients without compromising the quality of care. However, these alternative models may also increase costs, so they must undergo robust economic evaluations that not only take into account improvements in patient and carer outcomes, but also consider the benefit and costs to the health system as a whole.

A scoping review provides a rapid method of mapping key concepts within a research area and provides an overview of the main sources and types of evidence available.<sup>23</sup> It is most useful when the research question is complex or has not been reviewed comprehensively before. A number of reviews of alternative delivery models have been published in the past 5 years. Most reviews have focused on the delivery of a single test or treatment for a particular disease or condition,<sup>24 25</sup> or a single delivery arrangement-type such as chronic disease programmes,<sup>26</sup> multidisciplinary care or integrated care interventions.<sup>27</sup>

As such, these reviews do not adequately summarise the volume and scope of existing synthesised research on alternative delivery arrangements. A recent Cochrane overview has focused on delivery arrangements relevant to low-income countries.<sup>28</sup> However, low-income countries struggle with different health system demands, including a predominance of communicable diseases and resource constraints and limited access to new technologies and other resources. Therefore, the findings of this overview may be less applicable to high-income countries (for eg, it includes delivery arrangements for HIV/AIDS, malaria, childhood diarrhoea, pneumonia and vaccination and antenatal care).

To the best of our knowledge, no scoping review or overview of alternative delivery arrangements for health systems relevant to high-income countries has been conducted to date. This work is likely to be useful for decision makers by mapping the availability of existing synthesised evidence, including where economic analysis of alternative delivery arrangements exists and in highlighting gaps for future research. The proposed scoping review forms part of 5-year Partnership Centre for Health System Sustainability funded by the Australian National Health and Medical Research Council and other partners and aims to investigate and create interventions to improve health system performance sustainability.<sup>29</sup> This scoping review complements a systematic review by the Partnership Centre, currently under way, that will review the sustainability of interventions, improvement efforts and change strategies in the health system through an examination of trial data published in the last 5 years.<sup>16</sup>

## Objectives

This scoping review aims to describe the extent, range and nature of available systematic reviews of alternative delivery arrangements for health systems relevant to high-income countries published in the last 5 years. A time-frame of 5 years was chosen to ensure that the review contained evidence and data about effects that are up-to-date, reliable and ready to implement. A secondary aim is to identify gaps in the availability of up-to-date systematic reviews of alternative delivery arrangements needed to inform health system sustainability initiatives and future research directions.

## METHODS AND ANALYSIS

### Protocol development

The protocol for this scoping review is underpinned by the methodological framework first suggested by Arksey and O'Malley,<sup>30</sup> and further described by Levac and colleagues.<sup>31</sup> This framework emphasises transparency of the protocol development and scoping review process to increase the reliability of the findings.

### Criteria for considering studies for this review

We will include all English language systematic reviews examining the effects of alternative delivery arrangements



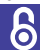

for health systems relevant to high-income countries published between 1 January 2012 and 20 September 2017. Alternative delivery arrangements include changes to how and when care is delivered, where care is provided and changes to the healthcare environment, who provides care and how the workforce is managed, co-ordination of care and management of care processes and information and communication technology systems.

For inclusion, systematic reviews must assess the effects of alternative delivery arrangements of relevance to high-income countries (as classified by the World Bank for the 2017 fiscal year),<sup>32</sup> have a methods section with explicit inclusion criteria, and report at least one of the following outcomes: patient outcomes (health and health behaviours), quality of care, access and/or utilisation of healthcare services, resource use, impacts on equity and/or social outcomes, healthcare provider outcomes and adverse effects. We will consider for inclusion systematic reviews in any setting, including hospital (inpatient or outpatient care, acute or subacute), primary care, long-term care facilities and the community.

### Search methods for identifying studies

We will search the 'Pretty Darn Quick' (PDQ)-Evidence for systematic reviews published between 1 January 2012 and 20 September 2017. PDQ-Evidence is a database of evidence for decisions about health systems derived from the Epistemonikos database of systematic reviews. It includes the following databases: Cochrane Database of Systematic Reviews, Database of Abstracts of Reviews of Effectiveness, MEDLINE via PubMed, EMBASE, CINAHL, PsycINFO, Latin American and Caribbean Health Sciences Literature, Joanna Briggs Institute Database of Systematic Reviews and Implementation Reports, Evidence for Policy and Practice Information and Co-ordinating Centre Evidence Library and the Campbell Collaboration online library. The 'intervention' publication filter will be used to exclude systematic reviews of non-intervention studies. An example of the search method has been provided as an online supplementary file.

### Study selection

Two review authors will independently screen the titles and abstracts retrieved by the search for inclusion and code as 'retrieve' (potentially eligible or unclear) or 'do not retrieve' (ineligible). We will retrieve the full text reports of potentially eligible and unclear titles and abstracts. Two (of a team of four) review authors will independently screen the full text reports and identify systematic reviews for inclusion and exclusion. We will record the reasons for exclusion of ineligible systematic reviews. We will resolve disagreements regarding eligibility through discussion, and if consensus is not achieved, by involving a third review author. We will prepare a Preferred Reporting Items for Systematic Reviews and Meta-Analyses flow chart summarising the search and selection process and the number of articles reviewed at each stage.

### Data extraction and management

We will extract descriptive data on systematic review characteristics (year, authors, journal, number and design of included studies), delivery arrangement category and subcategory, target population, setting and target health issue/s. Outcome categories and the main effects searched for by systematic review authors will also be collected (patient outcomes, quality of care, access and/or utilisation of healthcare services, resource use, impacts on equity and/or social outcomes, healthcare provider outcomes, adverse effects and economic analysis, where reported). The research team will develop, pilot and refine a data extraction form<sup>31</sup> (preliminary version of the data extraction form is presented in [table 1](#)).

As we anticipate a large volume of included studies, four review authors will be involved in the data extraction process. Initially, all four will independently extract data and populate the data extraction form for 10 systematic reviews and discrepancies will be discussed to ensure the process for extraction is consistent. The remaining systematic reviews will then be divided between reviewers. While independent data extraction of included studies by two review authors is not routinely recommended in method guidance for scoping reviews,<sup>31</sup> we will have a second reviewer allocated to extract a random sample of one third of included systematic reviews to assess the level of consistency and determine the accuracy of our process. Any disagreement between reviewer extraction processes will be resolved through discussion until consensus is reached. If the mean agreement in data extraction across this subset of systematic reviews is >90%, no further checks will be conducted. The data extraction process is illustrated in [figure 1](#).

### Collating and summarising results

We will categorise the delivery arrangements according to the Cochrane Effective Practice and Organisation of Care (EPOC) taxonomy of health system interventions.<sup>33</sup> This taxonomy is useful for organising and characterising health system interventions according to conceptual, functional and/or practical similarities. The delivery arrangement domain of the taxonomy classifies interventions based on changes to the following:

- ▶ How and when care is delivered.
- ▶ Where care is provided and changes to the healthcare environment.
- ▶ Who provides care and how the healthcare workforce is managed.
- ▶ Co-ordination of care and management of care processes and
- ▶ Information and communication technology systems.

In addition, we will use a category titled 'multiple (goal-focused)' to categorise systematic reviews that include all relevant delivery arrangements from across the above categories to address a specific problem or goal (eg, interventions for enhancing medication adherence).

We will summarise our findings quantitatively by presenting a numerical count of reviews in each category

**Table 1** Preliminary version of the data extraction form

| Study ID | Author, year | Brief description of intervention /objective | Place published | EPOC Delivery arrangement strategy | Sub-category | Number and type of trials included | Target population | Setting | Target health issue/s | Patient outcomes (health and health behaviours for example, mortality, cure rates) | Quality of care (systems or processes for improving quality of care for example, timeout before surgery) | Resource use | Impacts on equity | Social outcomes (eg, poverty, unemployment) | Access, utilisation (eg, re-admission rates, length of stay) | Healthcare provider outcomes (eg, overall well-being, fatigue, stress, satisfaction) | Economic analyses | Adverse effects |
|----------|--------------|----------------------------------------------|-----------------|------------------------------------|--------------|------------------------------------|-------------------|---------|-----------------------|------------------------------------------------------------------------------------|----------------------------------------------------------------------------------------------------------|--------------|-------------------|---------------------------------------------|--------------------------------------------------------------|--------------------------------------------------------------------------------------|-------------------|-----------------|
| ID1      |              |                                              |                 |                                    |              |                                    |                   |         |                       |                                                                                    |                                                                                                          |              |                   |                                             |                                                              |                                                                                      |                   |                 |
| ID2      |              |                                              |                 |                                    |              |                                    |                   |         |                       |                                                                                    |                                                                                                          |              |                   |                                             |                                                              |                                                                                      |                   |                 |
| ID3      |              |                                              |                 |                                    |              |                                    |                   |         |                       |                                                                                    |                                                                                                          |              |                   |                                             |                                                              |                                                                                      |                   |                 |

EPOC, Effective Practice and Organisation of Care.

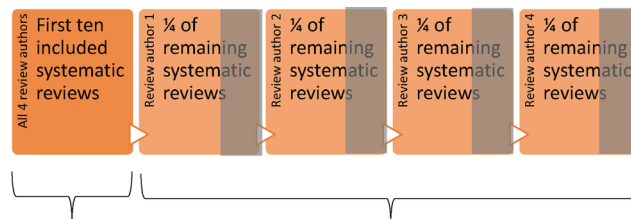

All four authors will independently extract data from the first 10 studies, compare results modify tool as required

1/3 of systematic reviews (indicated by grey shadow) will be extracted by two review authors. If >90% agreement is reached, no further checks of data extraction process will be completed.

**Figure 1** Data extraction process for included systematic reviews. All four authors will extract data from the first 10 systematic reviews. The remaining systematic reviews will be divided between the four review authors, and each author will have 1/3 of his/her studies reviewed by a second author to assess the level of agreement. If >90% agreement is reached, no further checks of data extraction process will be completed.

and visually using bubble charts to represent the quantity and range of systematic reviews across the delivery arrangement categories and to highlight gaps in the available synthesised evidence. Bubble charts allow the reader to see an overview of the spread of data across and within EPOC categories.<sup>34</sup> We will also describe the extent, range and nature of available systematic reviews using a narrative synthesis. This process will allow for identification of gaps in the availability of up-to-date systematic reviews and areas of delivery arrangements where the evidence is limited. Specifically, results will be used to (1) quantify the extent, range and nature of delivery strategies reported in systematic reviews, (2) quantify the number of systematic reviews where an economic analysis of the arrangement was reported and (3) determine the gaps and suggest delivery arrangements where future systematic reviews might be of use.

**Patient and public involvement**

The Consumers Health Forum of Australia, a representative advocate body for consumers in healthcare, have had oversight in the development and design of the protocol for this scoping review. Specifically, two members of the forum participated in stakeholder workshops during the design of the scoping review. The results will be disseminated among all stakeholders of the Partnership Grant, including consumer representatives.

**CONCLUSION**

This scoping review will describe the volume and scope of available up-to-date systematic reviews of alternative delivery arrangements relevant to high-income countries, and identify gaps in the synthesised evidence, needed to inform health system planning, health system sustainability initiatives and future research directions.



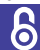

## ETHICS AND DISSEMINATION

As no primary data will be collected, ethical approval is not required. The study findings will be disseminated via reports, manuscript in a peer-reviewed journal and via conference presentations.

### Author affiliations

<sup>1</sup>Monash Department of Clinical Epidemiology, Cabrini Institute, Monash University, Malvern, Victoria, Australia

<sup>2</sup>Department of Epidemiology and Preventive Medicine, School of Public Health and Preventive Medicine, Monash University, Melbourne, Victoria, Australia

<sup>3</sup>Department of Allied Health, Northern Health, Melbourne, Victoria, Australia

<sup>4</sup>Nuffield Department of Population Health, University of Oxford, Oxford, UK

**Contributors** The study conception and overall design was conceived by RB and DAO. RLJ, DAO and PP designed the data extraction tool and RLJ, PP, KR and JN all assisted in piloting. RLJ wrote the first draft of this protocol and RB, DAO, PP, KR, JN, SC and SS critically reviewed the manuscript, contributed improvements and approved the final version.

**Funding** This work was supported by an NHMRC Partnership Centre for Health System Sustainability (Grant ID: 9100002). Along with the NHMRC, the funding partners in this research collaboration are: BUPA Health Foundation; NSW Health; Department of Health, Western Australia; and The University of Notre Dame Australia. RB is funded by an NHMRC Senior Principal Research Fellowship (#APP1082138).

**Competing interests** None declared.

**Patient consent** Not required.

**Provenance and peer review** Not commissioned; externally peer reviewed.

**Open access** This is an open access article distributed in accordance with the Creative Commons Attribution Non Commercial (CC BY-NC 4.0) license, which permits others to distribute, remix, adapt, build upon this work non-commercially, and license their derivative works on different terms, provided the original work is properly cited, appropriate credit is given, any changes made indicated, and the use is non-commercial. See: <http://creativecommons.org/licenses/by-nc/4.0/>.

## REFERENCES

- Walker A. National Centre for Social and Economic Modelling, University of Canberra. *Australia's ageing population*. Canberra: National Centre for Social and Economic Modelling, University of Canberra, 1998.
- Healey J. *Ageing*. Thirroul: Spinney Press, 2008.
- Pathirana T, Clark J, Moynihan R. Mapping the drivers of overdiagnosis to potential solutions. *BMJ* 2017;358:j3879.
- Moynihan R, Heath I, Henry D. Selling sickness: the pharmaceutical industry and disease mongering \* Commentary: Medicalisation of risk factors. *BMJ* 2002;324:886–91.
- Glasziou P, Moynihan R, Richards T, et al. Too much medicine; too little care. *BMJ* 2013;347:f4247.
- Hansen TW, Kikuya M, Thijs L, et al. Diagnostic thresholds for ambulatory blood pressure moving lower: a review based on a meta-analysis-clinical implications. *J Clin Hypertens* 2008;10:377–81.
- Mills NL, Lee KK, McAllister DA, et al. Implications of lowering threshold of plasma troponin concentration in diagnosis of myocardial infarction: cohort study. *BMJ* 2012;344:e1533.
- Forouhi NG, Balkau B, Borch-Johnsen K, et al. The threshold for diagnosing impaired fasting glucose: a position statement by the European Diabetes Epidemiology Group. *Diabetologia* 2006;49:822–7.
- Hill S, Wiley I. *The knowledgeable patient: communication and participation in health*. Hoboken, NJ: Wiley-Blackwell, 2011.
- Health participation: achieving greater public participation and accountability in the Australian health care system*. Melbourne: National Health Strategy, 1993.
- Gordon B. Solving the workforce shortage. *Health Progress* 2003;84:59.
- Del Mar C. New investments in primary care in Australia. *BMC Health Serv Res* 2011;11:39.
- Brooks PM, Robinson L, Ellis N. Options for expanding the health workforce. *Aust Health Rev* 2008;32:156–60.
- Buchan JM, Naccarella L, Brooks PM. Is health workforce sustainability in Australia and New Zealand a realistic policy goal? *Aust Health Rev* 2011;35:152–5.
- Australia's health workforce productivity commission research report*. Canberra: Productivity Commission, 2005.
- Braithwaite J, Testa L, Lamprell G, et al. Built to last? The sustainability of health system improvements, interventions and change strategies: a study protocol for a systematic review. *BMJ Open* 2017;7:e018568.
- Gonçalves-Bradley DC, Iliffe S, Doll HA, et al. Early discharge hospital at home. *The Cochrane Library* 2017.
- Sandall J, Soltani H, Gates S, et al. Midwife-led continuity models versus other models of care for childbearing women. *Cochrane Database Syst Rev* 2016;4:CD004667.
- Khangura JK, Flodgren G, Perera R, et al. Primary care professionals providing non-urgent care in hospital emergency departments. *The Cochrane Library* 2012.
- Hooper GJ, Rothwell AG, Frampton C, et al. Does the use of laminar flow and space suits reduce early deep infection after total hip and knee replacement?: the ten-year results of the New Zealand Joint Registry. *J Bone Joint Surg Br* 2011;93:85–90.
- Owens DK, Qaseem A, Chou R, et al. High-value, cost-conscious health care: concepts for clinicians to evaluate the benefits, harms, and costs of medical interventions. *Ann Intern Med* 2011;154:174–80.
- Australian Government Productivity Commission. *Shifting the dial: 5 year productivity review - Inquiry report*. Canberra: Australian Government Productivity Commission, 2017.
- Dijkers M. What is a scoping review. *KT Update* 2015;4:1–4.
- Zammarchi L, Casadei G, Strohmeier M, et al. A scoping review of cost-effectiveness of screening and treatment for latent tuberculosis infection in migrants from high-incidence countries. *BMC Health Serv Res* 2015;15:412.
- Boydell KM, Hodgins M, Pignatiello A, et al. Using technology to deliver mental health services to children and youth: a scoping review. *J Can Acad Child Adolesc Psychiatry* 2014;23:87.
- Hisashige A. The effectiveness and efficiency of disease management programs for patients with chronic diseases. *Global journal of health science* 2013;5:27.
- Damery S, Flanagan S, Combes G. Does integrated care reduce hospital activity for patients with chronic diseases? An umbrella review of systematic reviews. *BMJ Open* 2016;6:e011952.
- Ciapponi A, Lewin S, Herrera CA, et al. Delivery arrangements for health systems in low-income countries: an overview of systematic reviews. *Cochrane Database Syst Rev* 2017;32.
- Macquarie University. NHMRC partnership centre for health system sustainability. 2018. <http://aihi.mq.edu.au/project/nhmrc-partnership-centre-health-system-sustainability> (Accessed Sep 2018).
- Arksey H, O'Malley L. Scoping studies: towards a methodological framework. *Int J Soc Res Methodol* 2005;8:19–32.
- Levac D, Colquhoun H, O'Brien KK. Scoping studies: advancing the methodology. *Implement Sci* 2010;5:69.
- World Bank. World bank country and lending groups. <https://datahelpdesk.worldbank.org/knowledgebase/articles/906519-world-bank-country-and-lending-groups2017> (Accessed September 2017).
- Effective Practice and Organisation of Care (EPOC). EPOC taxonomy 2015. 2015. <https://epoc.cochrane.org/epoc-taxonomy> (Accessed Sep 2018).
- Robbins NB. *Creating more effective graphs*: Wiley, 2012.

## Supplementary file 2

| Delivery arrangement by EPOC Taxonomy category and subcategory          | EPOC Definition                                                                                                                                                            | No of SRs | Intervention details                                                                                                                                                                                                                                                                                                                                                                                                                                                                                                                                                                                                                                                                                                                                                                                                                                                                                                                                                                                                                                                                                                                                                                                                                                                                                                                                                                                                                                                                              |
|-------------------------------------------------------------------------|----------------------------------------------------------------------------------------------------------------------------------------------------------------------------|-----------|---------------------------------------------------------------------------------------------------------------------------------------------------------------------------------------------------------------------------------------------------------------------------------------------------------------------------------------------------------------------------------------------------------------------------------------------------------------------------------------------------------------------------------------------------------------------------------------------------------------------------------------------------------------------------------------------------------------------------------------------------------------------------------------------------------------------------------------------------------------------------------------------------------------------------------------------------------------------------------------------------------------------------------------------------------------------------------------------------------------------------------------------------------------------------------------------------------------------------------------------------------------------------------------------------------------------------------------------------------------------------------------------------------------------------------------------------------------------------------------------------|
| How and when care is delivered (n= 47)                                  |                                                                                                                                                                            |           |                                                                                                                                                                                                                                                                                                                                                                                                                                                                                                                                                                                                                                                                                                                                                                                                                                                                                                                                                                                                                                                                                                                                                                                                                                                                                                                                                                                                                                                                                                   |
| Queuing strategies                                                      | A reduction or increase in time to access a healthcare intervention, for example managed waiting lists, managing ER wait time.                                             | 7         | <ul style="list-style-type: none"> <li>- ED visit reduction programs (1, 2)</li> <li>- Improving patient flow and quality of care in the ED (3, 4)</li> <li>- Interventions to reduce waiting times for elective surgical procedures (5)</li> <li>- Patient initiated clinics for patients with chronic or recurrent conditions managed in secondary care (6, 7)</li> </ul>                                                                                                                                                                                                                                                                                                                                                                                                                                                                                                                                                                                                                                                                                                                                                                                                                                                                                                                                                                                                                                                                                                                       |
| Group versus individual care                                            | Providing care to groups versus individual patients                                                                                                                        | 5         | <ul style="list-style-type: none"> <li>- Group clinics (chronic conditions, antenatal care) (8-12)</li> </ul>                                                                                                                                                                                                                                                                                                                                                                                                                                                                                                                                                                                                                                                                                                                                                                                                                                                                                                                                                                                                                                                                                                                                                                                                                                                                                                                                                                                     |
| Quality and Safety                                                      | Essential standards for quality of healthcare, and reduction of poor outcomes related to unsafe healthcare                                                                 | 33        | <ul style="list-style-type: none"> <li>- Immediate versus deferred delivery of the preterm baby with suspected foetal compromise for improving outcomes (13)</li> <li>- Implementation of guidelines and evidence-based (14, 15)</li> <li>- Integrated care models (chronic diseases, specifically CVD, diabetes type 2, cancer, childhood obesity, haemophilia, mental health, multi-morbidities, chronic viral hepatitis) (16)</li> <li>- Interventions to increase breastfeeding (17)</li> <li>- Medication reconciliation interventions at hospital (18)</li> <li>- Patient safety interventions (in dentistry, acute care, ED; using safety check list, interventions to reduce wrong-site surgery, involvement in National Surgical Quality Improvement Program, incidence and error reporting at ICU, use of patient portals and EMR to improve safety of surgical procedures and medication prescription) (19-24)</li> <li>- Promoting hand hygiene (25)</li> <li>- Promoting use of guidelines and evidence-based medicine (26-29)</li> <li>- Reducing disparities in health and health care (30)</li> <li>- Reducing exposure to ionizing radiation from medical imaging (31)</li> <li>- Reducing medication and over-prescription (antibiotic use, opioid prescription, administration errors in children and adults, inappropriate prescribing in elderly) (32-44)</li> <li>- Using interpreters for non-English speakers on the delivery of palliative care (cancer) (45)</li> </ul> |
| Triage                                                                  | Management of patients attending a healthcare facility, or contacting a healthcare professional by phone, and receiving advice or being referral to an appropriate service | 2         | <ul style="list-style-type: none"> <li>- Improving patient flow and quality of care in the ED (46)</li> <li>- Pharmacist involvement in care for patients with chronic disease (heart failure and acute coronary syndrome, chronic kidney disease, HIV, cancer, mental disease), lifestyle changes (immunization, obesity, alcohol, smoking) (47)</li> </ul>                                                                                                                                                                                                                                                                                                                                                                                                                                                                                                                                                                                                                                                                                                                                                                                                                                                                                                                                                                                                                                                                                                                                      |
| Where care is provided and changes to the healthcare environment (n=55) |                                                                                                                                                                            |           |                                                                                                                                                                                                                                                                                                                                                                                                                                                                                                                                                                                                                                                                                                                                                                                                                                                                                                                                                                                                                                                                                                                                                                                                                                                                                                                                                                                                                                                                                                   |
| Environment                                                             | Changes to the physical or sensory healthcare environment                                                                                                                  | 1         | Interventions to increase breastfeeding uptake (48)                                                                                                                                                                                                                                                                                                                                                                                                                                                                                                                                                                                                                                                                                                                                                                                                                                                                                                                                                                                                                                                                                                                                                                                                                                                                                                                                                                                                                                               |
| Outreach services                                                       | Visits by health workers to different locations, for example involving specialists, generalists, mobile units                                                              | 1         | Mobile clinical for women's and children's health (49)                                                                                                                                                                                                                                                                                                                                                                                                                                                                                                                                                                                                                                                                                                                                                                                                                                                                                                                                                                                                                                                                                                                                                                                                                                                                                                                                                                                                                                            |
| Site of service                                                         | Changes in where care is provided, for example home vs.                                                                                                                    | 51        | <ul style="list-style-type: none"> <li>- Alternatives to hospitalisations: outpatient management, quick diagnostic units, hospital-at-home, observation units (for induction of</li> </ul>                                                                                                                                                                                                                                                                                                                                                                                                                                                                                                                                                                                                                                                                                                                                                                                                                                                                                                                                                                                                                                                                                                                                                                                                                                                                                                        |

|                                                                                                                                        |                                 |                                                                                                                                             |    |                                                                                                                                                                                                                                                                                                                                                                                                                                                                                                                                                                                                                                                                                                                                                                                                                                                                                                                                                                                                                                                                                                                                                                                                                                                                                                                                                                                                                                                                                        |
|----------------------------------------------------------------------------------------------------------------------------------------|---------------------------------|---------------------------------------------------------------------------------------------------------------------------------------------|----|----------------------------------------------------------------------------------------------------------------------------------------------------------------------------------------------------------------------------------------------------------------------------------------------------------------------------------------------------------------------------------------------------------------------------------------------------------------------------------------------------------------------------------------------------------------------------------------------------------------------------------------------------------------------------------------------------------------------------------------------------------------------------------------------------------------------------------------------------------------------------------------------------------------------------------------------------------------------------------------------------------------------------------------------------------------------------------------------------------------------------------------------------------------------------------------------------------------------------------------------------------------------------------------------------------------------------------------------------------------------------------------------------------------------------------------------------------------------------------------|
| 1<br>2<br>3<br>4<br>5<br>6<br>7<br>8<br>9<br>10<br>11<br>12<br>13<br>14<br>15<br>16<br>17<br>18                                        | delivery                        | healthcare facility, inpatient vs outpatient, specialized vs. non-specialized facility, walk in clinics, medical day hospital, mobile units |    | <p>labour, intravenous antibiotic therapy for cystic fibrosis, cardiac arrest, kidney dialysis, COPD, psychosis, paediatric care) (50-78)</p> <ul style="list-style-type: none"> <li>- ED based interventions (for managing alcohol misuse, domestic violence, palliative care) (79-81)</li> <li>- Home visiting (for pregnancy, child health and maltreatment, social determinants of health, partner violence) (82-87)</li> <li>- Home based prevention and rehabilitation (88-92)</li> <li>- Integrated care models (for chronic diseases, specifically CVD, diabetes type 2, cancer, childhood obesity, haemophilia, mental health, multi-morbidities, chronic viral hepatitis) (93)</li> <li>- Pre-hospital intervention in sepsis (94)</li> <li>- Reaching youth with out-of-facility services (HIV and reproductive health) (95)</li> <li>- School-based health centres for mental health, social determinants of health (96, 97)</li> <li>- Therapeutic communities for mental health (98, 99)</li> <li>- Waiting room based intervention to prevent STD (100)</li> </ul>                                                                                                                                                                                                                                                                                                                                                                                                      |
| 19<br>20<br>21<br>22                                                                                                                   | Size of organizations           | Increasing or decreasing the size of health service provider units                                                                          | 1  | <ul style="list-style-type: none"> <li>- Centralisation, specialisation and increasing volume of services to promote quality (e.g. cancer care and surgery) (101)</li> </ul>                                                                                                                                                                                                                                                                                                                                                                                                                                                                                                                                                                                                                                                                                                                                                                                                                                                                                                                                                                                                                                                                                                                                                                                                                                                                                                           |
| 23<br>24<br>25                                                                                                                         | Transportation services         | Arrangements for transporting patients from one site to another                                                                             | 1  | <ul style="list-style-type: none"> <li>- Helicopter emergency medical services for adults with major trauma (102)</li> </ul>                                                                                                                                                                                                                                                                                                                                                                                                                                                                                                                                                                                                                                                                                                                                                                                                                                                                                                                                                                                                                                                                                                                                                                                                                                                                                                                                                           |
| Who provides care and how the healthcare workforce is managed (n= 80)                                                                  |                                 |                                                                                                                                             |    |                                                                                                                                                                                                                                                                                                                                                                                                                                                                                                                                                                                                                                                                                                                                                                                                                                                                                                                                                                                                                                                                                                                                                                                                                                                                                                                                                                                                                                                                                        |
| 26<br>27<br>28<br>29<br>30<br>31<br>32<br>33<br>34<br>35<br>36<br>37<br>38<br>39<br>40<br>41<br>42<br>43<br>44<br>45<br>46<br>47<br>48 | Role expansion or task shifting | Expanding tasks undertaken by a cadre of health workers or shifting tasks from one cadre to another                                         | 65 | <ul style="list-style-type: none"> <li>- Advanced practice nursing in older people and in long-term care (103, 104)</li> <li>- Advanced trauma life support training for hospital health professional and ambulance crews (105, 106)</li> <li>- Carer involvement in cognition-based interventions for people with dementia (107)</li> <li>- Community-based health worker interventions (e.g. to improve chronic disease management, care among vulnerable population, preventing adolescent pregnancies, management of urgent, low-acuity illnesses and injuries) (108-110)</li> <li>- Interventions to increase breastfeeding (111)</li> <li>- Nurse-physician substitution (preoperative assessment and anaesthesia for elective surgical patients, care and early Dis plan in chronic diseases, prescribing, endoscopy, patient navigation, managing anxiety, patient education, abortion and maternity care, dental care) (112-136)</li> <li>- Peer-led interventions (e.g. mental health, adolescent lifestyles, paediatric chronic diseases) (137-141)</li> <li>- Pharmacist involvement in care for patients with chronic disease (heart failure and acute coronary syndrome, chronic kidney disease, HIV, cancer, mental disease), lifestyle changes (immunization, obesity, alcohol, smoking) (142-164)</li> <li>- Primary care-led provision of care (e.g. non-urgent care in ED, end-of-life care) (165, 166)</li> <li>- Radiographers in advanced roles (167)</li> </ul> |
| 49<br>50<br>51<br>52<br>53<br>54<br>55<br>56<br>57                                                                                     | Self-management                 | Shifting the provision of care to patients or their families                                                                                | 15 | <ul style="list-style-type: none"> <li>- Patient navigation (breast cancer) (168)</li> <li>- Promoting self-management (e.g. chronic diseases, specifically HIV, diabetes foot care, COPD, asthma, children with epilepsy, anxiety, MS, IBS; self-administration of medication in the hospital, oral anticoagulation, home uterine monitoring for detecting preterm labour) (169-181)</li> <li>- Reducing medication and over-prescription (antibiotic use, opioid prescription, administration errors in children and adults, inappropriate prescribing in elderly) (182)</li> </ul>                                                                                                                                                                                                                                                                                                                                                                                                                                                                                                                                                                                                                                                                                                                                                                                                                                                                                                  |
| Co-ordination of care and management of care processes (n=122)                                                                         |                                 |                                                                                                                                             |    |                                                                                                                                                                                                                                                                                                                                                                                                                                                                                                                                                                                                                                                                                                                                                                                                                                                                                                                                                                                                                                                                                                                                                                                                                                                                                                                                                                                                                                                                                        |
| 58<br>59<br>60                                                                                                                         | Integrated healthcare systems   | Bringing together delivery, management and organisation of services related to diagnosis,                                                   | 16 | <ul style="list-style-type: none"> <li>- Integrated care models (e.g. chronic diseases, specifically CVD, diabetes type 2, cancer, childhood obesity, haemophilia, mental health, multi-morbidities, chronic viral hepatitis) (183-198)</li> </ul>                                                                                                                                                                                                                                                                                                                                                                                                                                                                                                                                                                                                                                                                                                                                                                                                                                                                                                                                                                                                                                                                                                                                                                                                                                     |

|                                 |                                                                                                                                                                                                                             |    |                                                                                                                                                                                                                                                                                                                                                                                                                                                                                                                                                                                                                                                                                                                                                                                                                                                                                                                                                                         |
|---------------------------------|-----------------------------------------------------------------------------------------------------------------------------------------------------------------------------------------------------------------------------|----|-------------------------------------------------------------------------------------------------------------------------------------------------------------------------------------------------------------------------------------------------------------------------------------------------------------------------------------------------------------------------------------------------------------------------------------------------------------------------------------------------------------------------------------------------------------------------------------------------------------------------------------------------------------------------------------------------------------------------------------------------------------------------------------------------------------------------------------------------------------------------------------------------------------------------------------------------------------------------|
|                                 | treatment, care, rehabilitation and health promotion                                                                                                                                                                        |    |                                                                                                                                                                                                                                                                                                                                                                                                                                                                                                                                                                                                                                                                                                                                                                                                                                                                                                                                                                         |
| Shared decision making          | A collaborative process that allows patients and their providers to make health care <b>decisions</b> together, taking into account the best scientific evidence available, as well as the patient's values and preferences | 14 | <ul style="list-style-type: none"> <li>- Educational intervention for patients and carers (end-of-life care, paediatric care) (199, 200)</li> <li>- Improving healthcare professionals skills (e.g. communication in cancer, performance in nursing homes, recognition and management of deteriorating patients, genetic education) (201)</li> <li>- Promoting adoption of Shared Decision Making (202, 203)</li> <li>- Reducing medication and over prescription (antibiotic use, opioid prescription, administration errors in children and adults, inappropriate prescribing in elderly) (204)</li> <li>- Shared decision making in pregnancy and delivery, treatment in older people and cancer screening (205-212)</li> </ul>                                                                                                                                                                                                                                      |
| Packages of care                | Integrated packages of care such as the Integrated Management of Childhood Illness (IMCI)                                                                                                                                   | 1  | <ul style="list-style-type: none"> <li>- Care delivery models/disease management (e.g. in dementia and other mental health conditions, elderly inpatients, epilepsy, asthma, HIV, hearth failure, chronic cough in children, antenatal care) (213)</li> </ul>                                                                                                                                                                                                                                                                                                                                                                                                                                                                                                                                                                                                                                                                                                           |
| Case management                 | Use of individuals, often specially trained nurses, to coordinate care for patients with multiple or complex needs                                                                                                          | 14 | <ul style="list-style-type: none"> <li>- Advance care planning (e.g., haemodialysis patients, palliative care, end-of-life interventions) (214-217)</li> <li>- Integrated care models (e.g. chronic diseases, specifically CVD, diabetes type 2, cancer, childhood obesity, haemophilia, mental health, multi-morbidities, chronic viral hepatitis) (218)</li> <li>- Outpatient case management (e.g. complex care needs, dementia and other mental disorders, CVD) (219-227)</li> </ul>                                                                                                                                                                                                                                                                                                                                                                                                                                                                                |
| Disease management              | Programs designed to manage or prevent a chronic condition using a systematic approach to care and potentially employing multiple ways of influencing patients, providers or the process of care                            | 16 | <ul style="list-style-type: none"> <li>- Adolescent-specific prenatal interventions on improving attendance and reducing harm during and after birth (228)</li> <li>- Care delivery models/disease management (e.g. in dementia and other mental health conditions, elderly inpatients, epilepsy, asthma, HIV, hearth failure, chronic cough in children, antenatal care) (229-235)</li> <li>- Chronic Disease Management – asthma (236)</li> <li>- Improving healthcare professionals skills (e.g. communication in cancer, performance in nursing homes, recognition and management of deteriorating patients, genetic education) (237-242)</li> <li>- Outpatient management of cardio-metabolic risk factor control in people with diabetes (243)</li> </ul>                                                                                                                                                                                                         |
| Care pathways                   | Strategies to link evidence to practice for specific health conditions. These strategies detail the local structure, systems and time-frames to address recommendations                                                     | 8  | <ul style="list-style-type: none"> <li>- Advanced care planning (244)</li> <li>- Care delivery models/disease management (245)</li> <li>- Critical Care path (e.g. head and neck cancer surgery, after discharge from an ICU) (246, 247)</li> <li>- Interventions to improve linkage with or retention in HIV services (248-250)</li> <li>- Rapid response systems to reduce hospital mortality (251)</li> </ul>                                                                                                                                                                                                                                                                                                                                                                                                                                                                                                                                                        |
| Teams                           | Care provided by teams or interdisciplinary collaboration                                                                                                                                                                   | 22 | <ul style="list-style-type: none"> <li>- Care delivery models/disease management (e.g. in dementia and other mental health conditions, elderly inpatients, epilepsy, asthma, HIV, hearth failure, chronic cough in children, antenatal care) (252)</li> <li>- Integrated care models (e.g. chronic diseases, specifically CVD, diabetes type 2, cancer, childhood obesity, haemophilia, mental health, multi-morbidities, chronic viral hepatitis) (253)</li> <li>- Interventions to promote work participation in people with regional musculoskeletal pain (254)</li> <li>- Multidisciplinary team care (e.g. chronic care, specifically RA, mental illness and crisis resolution, chronic kidney disease; trauma in elderly, palliative care in cancer, acute care, secondary fracture prevention, geriatric care, rehabilitation, end of life care, paediatric feeding disorders) (255-272)</li> <li>- Multidisciplinary team care (neonatal care) (273)</li> </ul> |
| Communication between providers | Systems or strategies for communication between health care providers                                                                                                                                                       | 6  | <ul style="list-style-type: none"> <li>- Improving clinical communication in hospitals, between primary and secondary care (274-277)</li> <li>- Improving patient handovers from hospital to primary care and vice versa (278, 279)</li> </ul>                                                                                                                                                                                                                                                                                                                                                                                                                                                                                                                                                                                                                                                                                                                          |
| Transition of care              | Interventions to improve transition from one care                                                                                                                                                                           | 7  | <ul style="list-style-type: none"> <li>- Transition from paediatrics to adults care (e.g. diabetes, mental health, RMDs, special health care needs) (280-286)</li> </ul>                                                                                                                                                                                                                                                                                                                                                                                                                                                                                                                                                                                                                                                                                                                                                                                                |

|                                                         |                                                                                                                                                                                                   |     |                                                                                                                                                                                                                                                                                                                                                                                                                                                                                                                                                                                                                                                                                                                                                                                                                                                                                                                                                                                    |
|---------------------------------------------------------|---------------------------------------------------------------------------------------------------------------------------------------------------------------------------------------------------|-----|------------------------------------------------------------------------------------------------------------------------------------------------------------------------------------------------------------------------------------------------------------------------------------------------------------------------------------------------------------------------------------------------------------------------------------------------------------------------------------------------------------------------------------------------------------------------------------------------------------------------------------------------------------------------------------------------------------------------------------------------------------------------------------------------------------------------------------------------------------------------------------------------------------------------------------------------------------------------------------|
|                                                         | provider to another                                                                                                                                                                               |     |                                                                                                                                                                                                                                                                                                                                                                                                                                                                                                                                                                                                                                                                                                                                                                                                                                                                                                                                                                                    |
| Discharge planning                                      | Systems for planning the discharge of patients from facilities                                                                                                                                    | 18  | <ul style="list-style-type: none"> <li>- (Early) supported Dis plan (e.g. acute stroke, COPD, elderly patients, children with cancer and febrile neutropenia) (287-298)</li> <li>- Fast-track surgery programs (liver surgery) (299-301)</li> <li>- Providing written information to reduce re-admissions in heart failure (302)</li> <li>- Transitional care management after hospital discharge to reduce 30-days readmission rates (303, 304)</li> </ul>                                                                                                                                                                                                                                                                                                                                                                                                                                                                                                                        |
| <b>Information and communication technology (n=189)</b> |                                                                                                                                                                                                   |     |                                                                                                                                                                                                                                                                                                                                                                                                                                                                                                                                                                                                                                                                                                                                                                                                                                                                                                                                                                                    |
| Health information systems                              | Health record and health management systems to store and manage patient health information, for example electronic patient records, or systems for recalling patients for follow-up or prevention | 13  | <ul style="list-style-type: none"> <li>- Health notes vs EMR in pregnancy (305, 306)</li> <li>- Interventions to improve attendance of appointments (307-309)</li> <li>- Interventions to increase vaccine uptake (elderly, children) (310)</li> <li>- Paediatric track and trigger systems for hospitalised children (311)</li> <li>- Patient safety interventions (312)</li> <li>- Recall intervals (dental visits, women with history of gestational diabetes, TB appointments) (313-315)</li> <li>- Reminder interventions to improve treatment adherence (316)</li> <li>- The Use of Medical Scribes in Health Care Settings (317)</li> </ul>                                                                                                                                                                                                                                                                                                                                 |
| The use of information and communication technology     | Technology based methods to transfer healthcare information and support the delivery of care.                                                                                                     | 13  | <ul style="list-style-type: none"> <li>- Computerized clinical decision support to enable patient-centred care (nutrition informatics, advice on drug dosage) (318)</li> <li>- Medication organization devices (319-321)</li> <li>- Medication reconciliation interventions at hospital (322)</li> <li>- Multimedia educational interventions for consumers about prescribed and over-the-counter medications (323)</li> <li>- Patient portals (324, 325)</li> <li>- Reducing inappropriate imaging and testing (e.g. cardiac, low-back pain imaging, lab tests ordering by GPs) (326)</li> <li>- Reducing medication and over-prescription (antibiotic use, opioid prescription, administration errors in children and adults, inappropriate prescribing in elderly) (327)</li> <li>- Serious games for professional training and patient education (e.g. chronic diseases, mental health) (328, 329)</li> <li>- Telehealth (range of intervention types) (330)</li> </ul>        |
| Smart home technologies                                 | Electronic assistive technologies                                                                                                                                                                 | 1   | <ul style="list-style-type: none"> <li>- Remote monitoring (e.g. after recent hospital discharge with heart failure, in elderly, asthma) (331)</li> </ul>                                                                                                                                                                                                                                                                                                                                                                                                                                                                                                                                                                                                                                                                                                                                                                                                                          |
| Telemedicine                                            | Exchange of healthcare information from one site to another via electronic communication                                                                                                          | 162 | <ul style="list-style-type: none"> <li>- Self-care apps (332-352)</li> <li>- Social media (353)</li> <li>- Social networks (354-356)</li> <li>- Telecoaching (357-359)</li> <li>- Telecoaching (automated telephone messaging) (360-362)</li> <li>- Telecoaching (peer support programs) (363)</li> <li>- Telecoaching (telephone counselling) (364-373)</li> <li>- Telecoaching (web-based programs) (374-422)</li> <li>- Telehealth (423)</li> <li>- Telehealth (email communication) (424-426)</li> <li>- Telehealth (mobile phone messaging) (427-437)</li> <li>- Telehealth (mobile phone technology) (438, 439)</li> <li>- Telehealth (mobile phone) (440)</li> <li>- Telehealth (mobile technology) (441)</li> <li>- Telehealth (range of intervention types) (442-464)</li> <li>- Telehealth (telemonitoring)(465-473)</li> <li>- Telemedicine (474-486)</li> <li>- Telemedicine (screening) (487, 488)</li> <li>- Telemedicine (tele-rehabilitation) (489-493)</li> </ul> |
| <b>Goal-focused reviews (n=38)</b>                      |                                                                                                                                                                                                   |     |                                                                                                                                                                                                                                                                                                                                                                                                                                                                                                                                                                                                                                                                                                                                                                                                                                                                                                                                                                                    |
| Interventions to address social determinants of         |                                                                                                                                                                                                   | 14  | <ul style="list-style-type: none"> <li>- Culturally appropriate prevention and care (494-502)</li> <li>- Eliminating repeat unintended pregnancy in teenagers (503)</li> <li>- Improving access for homeless (504)</li> <li>- Interventions to address social determinants of health (505-507)</li> </ul>                                                                                                                                                                                                                                                                                                                                                                                                                                                                                                                                                                                                                                                                          |



|                                                               |  |     |                                                                                                                           |
|---------------------------------------------------------------|--|-----|---------------------------------------------------------------------------------------------------------------------------|
| health                                                        |  |     |                                                                                                                           |
| Improving medication adherence                                |  | 11  | - Improving medication adherence (e.g. chronic diseases, specifically diabetes, HIV, CVD; in ethnic minorities) (508-518) |
| Addressing multimorbidity in primary care                     |  | 1   | - Addressing multimorbidity in primary care (519)                                                                         |
| Preventing readmissions                                       |  | 1   | - Preventing 30-Day Hospital Readmissions (520)                                                                           |
| Reducing inappropriate imaging and testing                    |  | 3   | - Reducing inappropriate imaging and testing (e.g. cardiac, low-back pain imaging, lab tests ordering by GPs) (521-523)   |
| Meeting family needs of the critically ill                    |  | 1   | - Meeting family needs of critically ill patients in an ICU (524)                                                         |
| Communicating contraceptive effectiveness                     |  | 1   | - Communicating contraceptive effectiveness (525)                                                                         |
| Improving adherence to treatment                              |  | 2   | - Improving adherence to treatment (children with chronic diseases, adult heart transplant patients) (526, 527)           |
| Interventions to increase retention in mental health services |  | 1   | - Interventions to increase retention in mental health services (528)                                                     |
| Interventions to increase vaccine uptake (elderly, children)  |  | 3   | - Interventions to increase vaccine uptake (elderly, children) (529-531)                                                  |
| Total                                                         |  | 531 |                                                                                                                           |

## References

1. Moe J, Kirkland S, Rawe E, Ospina MB, Vandermeer B, Campbell S, et al. Effectiveness of Interventions to Decrease Emergency Department Visits by Adult Frequent Users: A systematic review. *Academic emergency medicine : official journal of the Society for Academic Emergency Medicine*. 2017;24(1):40-52.
2. Raven MC, Kushel M, Ko MJ, Penko J, Bindman AB. The Effectiveness of Emergency Department Visit Reduction Programs: A Systematic Review. *Annals of emergency medicine*. 2016;68(4):467-83.e15.
3. Elder E, Johnston AN, Crilly J. Review article: systematic review of three key strategies designed to improve patient flow through the emergency department. *Emerg Med Australas*. 2015;27(5):394-404.
4. van Galen LS, Lammers EM, Schoonmade LJ, Alam N, Kramer MH, Nanayakkara PW. Acute medical units: The way to go? A literature review. *Eur J Intern Med*. 2017;39:24-31.
5. Ballini L, Negro A, Maltoni S, Vignatelli L, Flodgren G, Simera I, et al. Interventions to reduce waiting times for elective procedures. *Cochrane Database Syst Rev*. 2015(2):CD005610.
6. Chen CE, Chen CT, Hu J, Mehrotra A. Walk-in clinics versus physician offices and emergency rooms for urgent care and chronic disease management. *Cochrane Database Syst Rev*. 2017;2:CD011774.
7. Whear R, Abdul-Rahman AK, Boddy K, Thompson-Coon J, Perry M, Stein K. The clinical effectiveness of patient initiated clinics for patients with chronic or recurrent conditions managed in secondary care: a systematic review. *PLoS One*. 2013;8(10):e74774.
8. Booth A, Cantrell A, Preston L, Chambers D, Goyder E. What is the evidence for the effectiveness, appropriateness and feasibility of group clinics for patients with chronic conditions? A systematic review 2015 2015/12/None.
9. Carter EB, Temming LA, Akin J, Fowler S, Macones GA, Colditz GA, et al. Group Prenatal Care Compared With Traditional Prenatal Care: A Systematic Review and Meta-analysis. *Obstet Gynecol*. 2016;128(3):551-61.
10. Catling CJ, Medley N, Foureux M, Ryan C, Leap N, Teate A, et al. Group versus conventional antenatal care for women. *Cochrane Database Syst Rev*. 2015(2):CD007622.
11. O'Keeffe M, Hayes A, McCreesh K, Purtill H, O'Sullivan K. Are group-based and individual physiotherapy exercise programmes equally effective for musculoskeletal conditions? A systematic review and meta-analysis. *Br J Sports Med*. 2017;51(2):126-32.
12. Quiñones AR, Richardson J, Freeman M, Fu R, O'Neil ME, Motu'apuaka M, et al. Educational group visits for the management of chronic health conditions: a systematic review. *Patient education and counseling*. 2014;95(1):3-29.
13. Stock SJ, Bricker L, Norman JE, West HM. Immediate versus deferred delivery of the preterm baby with suspected fetal compromise for improving outcomes. *Cochrane Database Syst Rev*. 2016;7:CD008968.
14. Forman-Hoffman VL, Middleton JC, McKeeman JL, Stambaugh LF, Christian RB, Gaynes BN, et al. Strategies To Improve Mental Health Care for Children and Adolescents 2016 2016/12/None.
15. Petit Dit Dariel O, Regnaud JP. Do Magnet®-accredited hospitals show improvements in nurse and patient outcomes compared to non-Magnet hospitals: a systematic review. *Journal of Clinical Pharmacy and Therapeutics*. 2015;40(3):283-291.
16. Pasricha A, Deinstadt RT, Moher D, Killoran A, Rourke SB, Kendall CE. Chronic Care Model Decision Support and Clinical Information Systems interventions for people living with HIV: a systematic review. *J Gen Intern Med*. 2013;28(1):127-35.
17. Howe-Heyman A, Lutembacher M. The Baby-Friendly Hospital Initiative as an Intervention to Improve Breastfeeding Rates: A Review of the Literature. *Journal of midwifery & women's health*. 2016;61(1):77-102.
18. Christensen M, Lundh A. Medication review in hospitalised patients to reduce morbidity and mortality. *Cochrane Database Syst Rev*. 2016;2:CD008986.

19. Algie CM, Mahar RK, Wasiak J, Batty L, Gruen RL, Mahar PD. Interventions for reducing wrong-site surgery and invasive clinical procedures. *Cochrane Database Syst Rev.* 2015(3):CD009404.
20. Bailey E, Tickle M, Campbell S, O'Malley L. Systematic review of patient safety interventions in dentistry. *BMC oral health.* 2015;15(1):152.
21. Fudickar A, Horle K, Wiltfang J, Bein B. The effect of the WHO Surgical Safety Checklist on complication rate and communication. *Dtsch Arztebl Int.* 2012;109(42):695-701.
22. Lyons VE, Popejoy LL. Meta-analysis of surgical safety checklist effects on teamwork, communication, morbidity, mortality, and safety. *West J Nurs Res.* 2014;36(2):245-61.
23. Ojeleye O, Avery, A., Gupta, V. and Boyd, M. The evidence for the effectiveness of safety alerts in electronic patient medication record systems at the point of pharmacy order entry: a systematic review. *BMC medical informatics and decision making.* 2013.
24. Thomassen O, Storesund A, Softeland E, Brattebo G. The effects of safety checklists in medicine: a systematic review. *Acta Anaesthesiol Scand.* 2014;58(1):5-18.
25. Srigley JA, Furness CD, Gardam M. Interventions to improve patient hand hygiene: a systematic review. *J Hosp Infect.* 2016;94(1):23-9.
26. Blackwood B, Burns K.E.A, Cardwell C.R. and O'Halloran, P. Protocolized versus non-protocolized weaning for reducing the duration of mechanical ventilation in critically ill adult patients. *Cochrane Database of Systematic Reviews.* 2014.
27. Fiander M, McGowan, J., Grad, R., Pluye, P., Hannes, K., Labrecque, M., Roberts, N. W., Salzwedel, D. M., Welch, V. and Tugwell, P. Interventions to increase the use of electronic health information by healthcare practitioners to improve clinical practice and patient outcomes. *Cochrane Database of Systematic Reviews.* 2015.
28. Okelo SO, Butz AM, Sharma R, Diette GB, Pitts SI, King TM, et al. Interventions to Modify Health Care Provider Adherence to Asthma Guidelines 2013/05/None.
29. Omran D, Guirguis LM, Simpson SH. Systematic Review of Pharmacist Interventions to Improve Adherence to Oral Antidiabetic Medications in People with Type 2 Diabetes. *Canadian Journal of Diabetes.* 2012;36(5):292-9.
30. McPheeters ML, Kripalani S, Peterson NB, Idowu RT, Jerome RN, Potter SA, et al. Closing the quality gap: revisiting the state of the science (vol. 3: quality improvement interventions to address health disparities). Evidence report/technology assessment. 2012(208.3):1-475.
31. Thaker A, Navadeh S, Gonzales H, Malekinejad M. Effectiveness of Policies on Reducing Exposure to Ionizing Radiation From Medical Imaging: A Systematic Review. *J Am Coll Radiol.* 2015;12(12 Pt B):1434-45.
32. Alldred DP, Kennedy MC, Hughes C, Chen TF, Miller P. Interventions to optimise prescribing for older people in care homes. *Cochrane Database Syst Rev.* 2016;2:CD009095.
33. Bannan DF, Tully MP. Bundle interventions used to reduce prescribing and administration errors in hospitalized children: a systematic review. *J Clin Pharm Ther.* 2016;41(3):246-55.
34. Clyne B, Fitzgerald C, Quinlan A, Hardy C, Galvin R, Fahey T, et al. Interventions to Address Potentially Inappropriate Prescribing in Community-Dwelling Older Adults: A Systematic Review of Randomized Controlled Trials. *J Am Geriatr Soc.* 2016;64(6):1210-22.
35. Davey P, Marwick CA, Scott CL, Charani E, McNeil K, Brown E, et al. Interventions to improve antibiotic prescribing practices for hospital inpatients. *Cochrane Database Syst Rev.* 2017;2:CD003543.
36. Kaufmann J, Laschat M, Wappler F. Medication errors in pediatric emergencies: a systematic analysis. *Dtsch Arztebl Int.* 2012;109(38):609-16.
37. Keers RN, Williams SD, Cooke J, Walsh T, Ashcroft DM. Impact of interventions designed to reduce medication administration errors in hospitals: a systematic review. *Drug safety : an international journal of medical toxicology and drug experience.* 2014;37(5):317-32.
38. Maaskant JM, Vermeulen H, Apampa B, Fernando B, Ghaleb MA, Neubert A, et al. Interventions for reducing medication errors in children in hospital. *Cochrane Database Syst Rev.* 2015(3):CD006208.



- 1
- 2
- 3
- 4 39. Manias E, Williams A, Liew D. Interventions to reduce medication errors in adult intensive
- 5 care: a systematic review. *Br J Clin Pharmacol*. 2012;74(3):411-23.
- 6 40. Patterson SM, Cadogan CA, Kerse N, Cardwell CR, Bradley MC, Ryan C, et al. Interventions to
- 7 improve the appropriate use of polypharmacy for older people. *Cochrane Database Syst Rev*.
- 8 2014(10):CD008165.
- 9 41. Spurling GK, Del Mar CB, Dooley L, Foxlee R, Farley R. Delayed antibiotics for respiratory
- 10 infections. *Cochrane Database Syst Rev*. 2013(4):CD004417.
- 11 42. van der Velden AW, Pijpers, E. J., Kuyvenhoven, M. M., Tonkin-Crine, S. K., Little, P. and
- 12 Verheij, T. J. Effectiveness of physician-targeted interventions to improve antibiotic use for
- 13 respiratory tract infections. *The British journal of general practice : the journal of the Royal College*
- 14 *of General Practitioners*. 2012.
- 15 43. Windmill J, Fisher E, Eccleston C, Derry S, Stannard C, Knaggs R, et al. Interventions for the
- 16 reduction of prescribed opioid use in chronic non-cancer pain. *Cochrane Database Syst Rev*.
- 17 2013(9):CD010323.
- 18 44. Zhang YZaS, S. Antibiotic stewardship programmes in intensive care units: Why, how, and
- 19 where are they leading us. *World journal of critical care medicine*. 2015.
- 20 45. Silva MD, Genoff, M., Zaballa, A., Jewell, S., Stabler, S., Gany, F. M. and Diamond, L. C.
- 21 *Interpreting at the End of Life: A Systematic Review of the Impact of Interpreters on the Delivery of*
- 22 *Palliative Care Services to Cancer Patients with Limited English Proficiency*. *Journal of pain and*
- 23 *symptom management*. 2015.
- 24 46. Rowe BH, Guo X, Villa-Roel C, Schull M, Holroyd B, Bullard M, et al. The role of triage liaison
- 25 physicians on mitigating overcrowding in emergency departments: a systematic review. *Acad Emerg*
- 26 *Med*. 2012;18(2):111-20.
- 27 47. Curley LE, Moody J, Gobarani R, Aspden T, Jensen M, McDonald M, et al. Is there potential
- 28 for the future provision of triage services in community pharmacy? *Journal of pharmaceutical policy*
- 29 *and practice*. 2016.
- 30 48. Jaafar SH, Ho JJ, Lee KS. Rooming-in for new mother and infant versus separate care for
- 31 increasing the duration of breastfeeding. *Cochrane Database Syst Rev*. 2016(8):CD006641.
- 32 49. Abdel-Aleem H, El-Gibaly OM, El-Gazzar AF, Al-Attar GS. Mobile clinics for women's and
- 33 children's health. *Cochrane Database Syst Rev*. 2016(8):CD009677.
- 34 50. Arrich J, Holzer M, Havel C, Warenits AM, Herkner H. Pre-hospital versus in-hospital
- 35 initiation of cooling for survival and neuroprotection after out-of-hospital cardiac arrest. *Cochrane*
- 36 *Database Syst Rev*. 2016;3:CD010570.
- 37 51. Baishnab E, Karner C. Primary care based clinics for asthma. *Cochrane Database Syst Rev*.
- 38 2012(4):CD003533.
- 39 52. Balaguer A, Gonzalez de Dios J. Home versus hospital intravenous antibiotic therapy for
- 40 cystic fibrosis. *Cochrane Database Syst Rev*. 2015(12):CD001917.
- 41 53. Behan C, Masterson S, Clarke M. Systematic review of the evidence for service models
- 42 delivering early intervention in psychosis outside the stand-alone centre. *Early Interv Psychiatry*.
- 43 2017;11(1):3-13.
- 44 54. Brown L, Forster A, Young J, Crocker T, Benham A, Langhorne P, et al. Medical day hospital
- 45 care for older people versus alternative forms of care. *Cochrane Database Syst Rev*.
- 46 2015(6):CD001730.
- 47 55. Caplan GA, Sulaiman NS, Mangin DA, Aimonino Ricauda N, Wilson AD, Barclay L. A meta-
- 48 analysis of "hospital in the home". *The Medical journal of Australia*. 2012;197(9):512-9.
- 49 56. Hodnett ED, Downe, S., Walsh, D. Alternative versus conventional institutional settings for
- 50 birth. *Cochrane Database of Systematic Reviews*. 2012.
- 51 57. Ishani A, Slinin Y, Greer N, MacDonald R, Messana J, Rutks I, et al. Comparative Effectiveness
- 52 of Home-Based Kidney Dialysis Versus In-Center or Other Outpatient Kidney Dialysis Locations – A
- 53 Systematic Review 2015 2015/04/None.
- 54
- 55
- 56
- 57
- 58
- 59
- 60

- 1
  - 2
  - 3
  - 4
  - 5
  - 6
  - 7
  - 8
  - 9
  - 10
  - 11
  - 12
  - 13
  - 14
  - 15
  - 16
  - 17
  - 18
  - 19
  - 20
  - 21
  - 22
  - 23
  - 24
  - 25
  - 26
  - 27
  - 28
  - 29
  - 30
  - 31
  - 32
  - 33
  - 34
  - 35
  - 36
  - 37
  - 38
  - 39
  - 40
  - 41
  - 42
  - 43
  - 44
  - 45
  - 46
  - 47
  - 48
  - 49
  - 50
  - 51
  - 52
  - 53
  - 54
  - 55
  - 56
  - 57
  - 58
  - 59
  - 60
58. Jeppesen E BK, Vist GE, Wedzicha JA, Wright JJ, Greenstone M, Walters JA. Hospital at home for acute exacerbations of chronic obstructive pulmonary disease. *Cochrane Database of Systematic Reviews*. 2012.
59. Kelly AJ, Alfirevic Z, Ghosh A. Outpatient versus inpatient induction of labour for improving birth outcomes. *Cochrane Database Syst Rev*. 2013(11):CD007372.
60. Lawrence D, Fedorowicz Z, van Zuuren EJ. Day care versus in-patient surgery for age-related cataract. *Cochrane Database Syst Rev*. 2015(11):Cd004242.
61. MacIntyre EJ, Asadi L, McKim DA, Bagshaw SM. Clinical Outcomes Associated with Home Mechanical Ventilation: A Systematic Review. *Canadian respiratory journal*. 2016;2016(no pagination):6547180.
62. Malwade US, Jardine LA. Home- versus hospital-based phototherapy for the treatment of non-haemolytic jaundice in infants at more than 37 weeks' gestation. *Cochrane Database Syst Rev*. 2014(6):CD010212.
63. McCaul M, Lourens A, Kredt T. Pre-hospital versus in-hospital thrombolysis for ST-elevation myocardial infarction. *Cochrane Database Syst Rev*. 2014(9):CD010191.
64. Neves LF, Reis MH, Goncalves TR. Home or community-based pulmonary rehabilitation for individuals with chronic obstructive pulmonary disease: a systematic review and meta-analysis. *Cad Saude Publica*. 2016;32(6).
65. Nordly M, Vadstrup ES, Sjøgren P, Kurita GP. Home-based specialized palliative care in patients with advanced cancer: A systematic review. *Palliative & supportive care*. 2016;14(6):1-12.
66. Olsen O, Clausen JA. Planned hospital birth versus planned home birth. *Cochrane Database Syst Rev*. 2012(9):CD000352.
67. Palmer SC, Palmer AR, Craig JC, Johnson DW, Stroumza P, Frantzen L, et al. Home versus in-centre haemodialysis for end-stage kidney disease. *Cochrane Database Syst Rev*. 2014(11):Cd009535.
68. Parab CS, Cooper C, Woolfenden S, Piper SM. Specialist home-based nursing services for children with acute and chronic illnesses. *Cochrane Database Syst Rev*. 2013(6):CD004383.
69. Parker G, Spiers G, Gridley K, Atkin K, Birks Y, Lowson K, et al. Systematic review of international evidence on the effectiveness and costs of paediatric home care for children and young people who are ill. *Child: care, health and development*. 2013;39(1):1-19.
70. Abou El Senoun G, Dowswell T, Mousa HA. Planned home versus hospital care for preterm prelabour rupture of the membranes (PPROM) prior to 37 weeks' gestation. *Cochrane Database Syst Rev*. 2014(4):CD008053.
71. Shepperd S, Gonçalves?Bradley DC, Straus SE, Wee B. Hospital at home: home-based end-of-life care. *Cochrane Database of Systematic Reviews*. 2016.
72. Shepperd S, Iliffe S, Doll HA, Clarke MJ, Kalra L, Wilson AD, et al. Admission avoidance hospital at home. *Cochrane Database of Systematic Reviews*. 2016.
73. Totten AM, White-Chu EF, Wasson N, Morgan E, Kansagara D, Davis-O'Reilly C, et al. Home-Based Primary Care Interventions 2016 2016/02/None.
74. Veale D, Naismith I, Miles S, Gledhill LJ, Stewart G, Hodsoll J. Outcomes for residential or inpatient intensive treatment of obsessive-compulsive disorder: A systematic review and meta-analysis. *Journal of Obsessive-Compulsive and Related Disorders*. 2016;8:38-49.
75. Vinson DR, Zehtabchi S, Yealy DM. Can selected patients with newly diagnosed pulmonary embolism be safely treated without hospitalization? A systematic review. *Annals of emergency medicine*. 2012;60(5):651-62.e4.
76. Wong CX, Carson KV, Smith BJ. Home care by outreach nursing for chronic obstructive pulmonary disease. *Cochrane Database Syst Rev*. 2012(4):CD000994.
77. Yoo HH, Queluz TH, El Dib R. Outpatient versus inpatient treatment for acute pulmonary embolism. *Cochrane Database Syst Rev*. 2014(11):CD010019.
78. Zondag W, Kooiman J, Klok FA, Dekkers OM, Huisman MV. Outpatient versus inpatient treatment in patients with pulmonary embolism: a meta-analysis. *Eur Respir J*. 2013;42(1):134-44.

- 1
  - 2
  - 3
  - 4
  - 5
  - 6
  - 7
  - 8
  - 9
  - 10
  - 11
  - 12
  - 13
  - 14
  - 15
  - 16
  - 17
  - 18
  - 19
  - 20
  - 21
  - 22
  - 23
  - 24
  - 25
  - 26
  - 27
  - 28
  - 29
  - 30
  - 31
  - 32
  - 33
  - 34
  - 35
  - 36
  - 37
  - 38
  - 39
  - 40
  - 41
  - 42
  - 43
  - 44
  - 45
  - 46
  - 47
  - 48
  - 49
  - 50
  - 51
  - 52
  - 53
  - 54
  - 55
  - 56
  - 57
  - 58
  - 59
  - 60
79. Ansari S, Boyle A. Emergency department-based interventions for women suffering domestic abuse: a critical literature review. *Eur J Emerg Med.* 2017;24(1):13-8.
80. da Silva Soares D, Nunes CM, Gomes B. Effectiveness of Emergency Department Based Palliative Care for Adults with Advanced Disease: A Systematic Review. *J Palliat Med.* 2016;19(6):601-9.
81. Landy MS, Davey CJ, Quintero D, Pecora A, McShane KE. A Systematic Review on the Effectiveness of Brief Interventions for Alcohol Misuse among Adults in Emergency Departments. *Journal of substance abuse treatment.* 2015;61:1-12.
82. Abbott LS, Elliott LT. Eliminating Health Disparities through Action on the Social Determinants of Health: A Systematic Review of Home Visiting in the United States, 2005-2015. *Public health nursing (Boston, Mass).* 2017;34(1):2-30.
83. Avellar SA, Supplee LH. Effectiveness of home visiting in improving child health and reducing child maltreatment. *Pediatrics.* 2013;132 Suppl 2:S90-9.
84. Filene JH, Kaminski JW, Valle LA, Cachat P. Components associated with home visiting program outcomes: a meta-analysis. *Pediatrics.* 2013;132 Suppl 2:S100-9.
85. Peacock S, Konrad S, Watson E, Nickel D, Muhajarine N. Effectiveness of home visiting programs on child outcomes: a systematic review. *BMC Public Health.* 2013;13:17.
86. Prosmán G-J, Wong SHLF, van der Wouden JC, Lagro-Janssen ALM. Effectiveness of home visiting in reducing partner violence for families experiencing abuse: A systematic review. *Family Practice.* 2015;32(3).
87. Turnbull C OD. Home visits during pregnancy and after birth for women with an alcohol or drug problem. *Cochrane Database of Systematic Reviews.* 2012.
88. Cochrane A, Furlong M, McGilloway S, Molloy DW, Stevenson M, Donnelly M. Time-limited home-care reablement services for maintaining and improving the functional independence of older adults. *Cochrane Database Syst Rev.* 2016;10:CD010825.
89. Florez-Garcia M, Garcia-Perez F, Curbelo R, Perez-Porta I, Nishishinya B, Rosario Lozano MP, et al. Efficacy and safety of home-based exercises versus individualized supervised outpatient physical therapy programs after total knee arthroplasty: a systematic review and meta-analysis. *Knee Surg Sports Traumatol Arthrosc.* 2017;25(11):3340-53.
90. Legg L, Gladman J, Drummond A, Davidson A. A systematic review of the evidence on home care reablement services. *Clin Rehabil.* 2016;30(8):741-9.
91. Showell NN, Fawole O, Segal J, Wilson RF, Cheskin LJ, Bleich SN, et al. A systematic review of home-based childhood obesity prevention studies. *Pediatrics.* 2013;132(1):e193-200.
92. Li D, Yang Z, Kang P, Xie X. Home-Based Compared with Hospital-Based Rehabilitation Program for Patients Undergoing Total Knee Arthroplasty for Osteoarthritis: A Systematic Review and Meta-analysis of Randomized Controlled Trials. *American journal of physical medicine & rehabilitation / Association of Academic Physiatrists.* 2016;96(6):440-7.
93. Williams JW, Jackson GL, Powers BJ, Chatterjee R, Bettger JP, Kemper AR, et al. Closing the quality gap: revisiting the state of the science (vol. 2: the patient-centered medical home). *Evidence report/technology assessment.* 2012(208.2):1-210.
94. Smyth MA, Brace-McDonnell SJ, Perkins GD. Impact of Prehospital Care on Outcomes in Sepsis: A Systematic Review. *West J Emerg Med.* 2016;17(4):427-37.
95. Denno DM, Chandra-Mouli V, Osman M. Reaching youth with out-of-facility HIV and reproductive health services: a systematic review. *J Adolesc Health.* 2012;51(2):106-21.
96. Bains RM, Diallo AF. Mental Health Services in School-Based Health Centers: Systematic Review. *J Sch Nurs.* 2016;32(1):8-19.
97. Knopf JA, Finnie RK, Peng Y, Hahn RA, Truman BI, Vernon-Smiley M, et al. School-Based Health Centers to Advance Health Equity: A Community Guide Systematic Review. *American journal of preventive medicine.* 2016;51(1):114-26.

- 1  
2  
3 98. Capone G, Schroder, T., Clarke, S. and Braham, L. Outcomes of therapeutic community  
4 treatment for personality disorder. *Therapeutic Communities: The International Journal of*  
5 *Therapeutic Communities*. 2016;37(2):84-100.
- 6 99. Magor-Blatch L, Bhullar N, Thomson B, Thorsteinsson E. A systematic review of studies  
7 examining effectiveness of therapeutic communities. *Therapeutic Communities*. 2014;35(4).
- 8 100. Long L, Abraham C, Paquette R, Shahmanesh M, Llewellyn C, Townsend A, et al. Brief  
9 interventions to prevent sexually transmitted infections suitable for in-service use: A systematic  
10 review. *Preventive medicine*. 2016;91:364-82.
- 11 101. Yin Ling W, Maria, K., Andrew, B., Thomas, E. and Heather, O. D. Centralisation of services  
12 for gynaecological cancer. *Cochrane Database of Systematic Reviews*. 2012.
- 13 102. Galvagno Jr SM, Sikorski, R., Hirshon, J. M., Floccare, D., Stephens, C., Beecher, D. and  
14 Thomas, S. Helicopter emergency medical services for adults with major trauma. *Cochrane Database*  
15 *of Systematic Reviews*. 2015.
- 16 103. Donald F, Martin-Misener R, Carter N, Donald EE, Kaasalainen S, Wickson-Griffiths A, et al. A  
17 systematic review of the effectiveness of advanced practice nurses in long-term care. *Journal of*  
18 *advanced nursing*. 2013;69(10):2148-61.
- 19 104. Morilla-Herrera JC, Garcia-Mayor S, Martín-Santos FJ, Kaknani Uttumchandani S, Leon  
20 Campos Á, Caro Bautista J, et al. A systematic review of the effectiveness and roles of advanced  
21 practice nursing in older people. *International journal of nursing studies*. 2015;53:290-307.
- 22 105. Jayaraman S, Sethi D, Wong R. Advanced training in trauma life support for ambulance  
23 crews. *Cochrane Database of Systematic Reviews*. 2014(8).
- 24 106. Jayaraman S, Sethi D, Chinnock P, Wong R. Advanced trauma life support training for  
25 hospital staff. *Cochrane Database Syst Rev*. 2014(8):CD004173.
- 26 107. Leung P, Orgeta V, Orrell M. The effects on carer well-being of carer involvement in  
27 cognition-based interventions for people with dementia: a systematic review and meta-analysis. *Int J*  
28 *Geriatr Psychiatry*. 2017;32(4):372-85.
- 29 108. Bigham BL, Kennedy SM, Drennan I, Morrison LJ. Expanding paramedic scope of practice in  
30 the community: a systematic review of the literature. *Prehosp Emerg Care*. 2013;17(3):361-72.
- 31 109. Kim K, Choi JS, Choi E, Nieman CL, Joo JH, Lin FR, et al. Effects of Community-Based Health  
32 Worker Interventions to Improve Chronic Disease Management and Care Among Vulnerable  
33 Populations: A Systematic Review. *American journal of public health*. 2016;106(4):e1-e26.
- 34 110. Maravilla JC, Betts KS, Abajobir AA, Couto ECC, Alati R. The Role of Community Health  
35 Workers in Preventing Adolescent Repeat Pregnancies and Births. *J Adolesc Health*. 2016;59(4):378-  
36 90.
- 37 111. Patel S, Patel S. The Effectiveness of Lactation Consultants and Lactation Counselors on  
38 Breastfeeding Outcomes. *J Hum Lact*. 2016;32(3):530-41.
- 39 112. Barnard S, Kim C, Park MH, Ngo TD. Doctors or mid-level providers for abortion. *Cochrane*  
40 *Database Syst Rev*. 2015(7):CD011242.
- 41 113. Brocklehurst P, Mertz B, Jerkovic-Cosic K, Littlewood A, Tickle M. Direct access to midlevel  
42 dental providers: an evidence synthesis. *J Public Health Dent*. 2014;74(4):326-35.
- 43 114. Candelas G, Villaverde V, García S, Guerra M, León MJ, Cañete JD. Benefit of health  
44 education by a training nurse in patients with axial and/or peripheral psoriatic arthritis: A systematic  
45 literature review. *Rheumatology international*. 2016.
- 46 115. Creedon R, Byrne S, Kennedy J, McCarthy S. The impact of nurse prescribing on the clinical  
47 setting. *British journal of nursing (Mark Allen Publishing)*. 2015;24(17):878-85.
- 48 116. Day LW, Siao D, Inadomi JM, Somsouk M. Non-physician performance of lower and upper  
49 endoscopy: a systematic review and meta-analysis. *Endoscopy*. 2014;46(5):401-10.
- 50 117. Dyer TA, Brocklehurst P, Glenny AM, Davies L, Tickle M, Issac A, et al. Dental auxiliaries for  
51 dental care traditionally provided by dentists. *Cochrane Database Syst Rev*. 2014(8):CD010076.
- 52  
53  
54  
55  
56  
57  
58  
59  
60



- 1  
2  
3 118. Hines S, Munday J, Kynoch K. Effectiveness of nurse-led preoperative assessment services for  
4 elective surgery: a systematic review update. *JBHI database of systematic reviews and*  
5 *implementation reports*. 2015;13(6):279-317.
- 6 119. Kilpatrick K, Reid K, Carter N, Donald F, Bryant-Lukosius D, Martin-Misener R, et al. A  
7 *Systematic Review of the Cost-Effectiveness of Clinical Nurse Specialists and Nurse Practitioners in*  
8 *Inpatient Roles*. *Nursing leadership (Toronto, Ont)*. 2015;28(3):56-76.
- 9 120. Kuethe MC, Vaessen-Verberne AA, Elbers RG, Van Aalderen WM. Nurse versus physician-led  
10 care for the management of asthma. *Cochrane Database Syst Rev*. 2013(2):CD009296.
- 11 121. Lewis SR, Nicholson A, Smith AF, Alderson P. Physician anaesthetists versus non-physician  
12 providers of anaesthesia for surgical patients. *Cochrane Database Syst Rev*. 2014(7):CD010357.
- 13 122. Martinez-Gonzalez NA, Tandjung R, Djalali S, Huber-Geismann F, Markun S, Rosemann T.  
14 Effects of physician-nurse substitution on clinical parameters: a systematic review and meta-  
15 analysis. *PLoS One*. 2014;9(2):e89181.
- 16 123. Ngo TD, Park MH, Free C. Safety and effectiveness of termination services performed by  
17 doctors versus midlevel providers: a systematic review and analysis. *Int J Womens Health*. 2013;5:9-  
18 17.
- 19 124. Nicholson A, Coldwell CH, Lewis SR, Smith AF. Nurse-led versus doctor-led preoperative  
20 assessment for elective surgical patients requiring regional or general anaesthesia. *Cochrane*  
21 *Database Syst Rev*. 2013(11):CD010160.
- 22 125. Parker D, Maresco-Pennisi D, Clifton K, Shams R, Young J. Practice nurse involvement in the  
23 management of adults with type 2 diabetes mellitus attending a general practice: results from a  
24 systematic review. *International journal of evidence-based healthcare*. 2016;14(2):41-52.
- 25 126. Renner RM, Brahmi, D. and Kapp, N. Who can provide effective and safe termination of  
26 pregnancy care? A systematic review. *BJOG : an international journal of obstetrics and gynaecology*.  
27 2013.
- 28 127. Sandall J, Soltani H, Gates S, Shennan A, Devane D. Midwife-led continuity models versus  
29 other models of care for childbearing women. *Cochrane Database Syst Rev*. 2016;4:CD004667.
- 30 128. Snarterse M, Dobber J, Jepma P, Peters RJ, Ter Riet G, Boekholdt SM, et al. Effective  
31 components of nurse-coordinated care to prevent recurrent coronary events: a systematic review  
32 and meta-analysis. *Heart*. 2016;102(1):50-6.
- 33 129. Stephens M, Hourigan LF, Appleyard M, Ostapowicz G, Schoeman M, Desmond PV, et al.  
34 Non-physician endoscopists: A systematic review. *World J Gastroenterol*. 2015;21(16):5056-71.
- 35 130. Tho PC, Ang E. The effectiveness of patient navigation programs for adult cancer patients  
36 undergoing treatment: a systematic review. *JBHI database of systematic reviews and implementation*  
37 *reports*. 2016;14(2):295-321.
- 38 131. Van Camp YP, Van Rompaey B, Elseviers MM. Nurse-led interventions to enhance adherence  
39 to chronic medication: systematic review and meta-analysis of randomised controlled trials. *Eur J*  
40 *Clin Pharmacol*. 2013;69(4):761-70.
- 41 132. Weeks G, George J, Maclure K, Stewart D. Non-medical prescribing versus medical  
42 prescribing for acute and chronic disease management in primary and secondary care. *Cochrane*  
43 *Database Syst Rev*. 2016;11:CD011227.
- 44 133. Wright JT, Graham F, Hayes C, Ismail AI, Noraian KW, Weyant RJ, et al. A systematic review  
45 of oral health outcomes produced by dental teams incorporating midlevel providers. *J Am Dent*  
46 *Assoc*. 2013;144(1):75-91.
- 47 134. Zhu QM, Liu J, Hu HY, Wang S. Effectiveness of nurse-led early discharge planning  
48 programmes for hospital inpatients with chronic disease or rehabilitation needs: a systematic review  
49 and meta-analysis. *J Clin Nurs*. 2015;24(19-20):2993-3005.
- 50 135. Zweers D, de Graaf E, Teunissen SC. Non-pharmacological nurse-led interventions to manage  
51 anxiety in patients with advanced cancer: A systematic literature review. *International journal of*  
52 *nursing studies*. 2015;56:102-13.
- 53  
54  
55  
56  
57  
58  
59  
60

- 1  
2  
3 136. Martinez-Gonzalez NA, Djalali S, Tandjung R, Huber-Geismann F, Markun S, Wensing M, et al. Substitution of physicians by nurses in primary care: a systematic review and meta-analysis. *BMC Health Serv Res.* 2014;14:214.
- 4  
5  
6 137. Bryan AE, Arkowitz H. Meta-analysis of the effects of peer-administered psychosocial interventions on symptoms of depression. *Am J Community Psychol.* 2015;55(3-4):455-71.
- 7  
8 138. MacArthur GJ, Harrison S, Caldwell DM, Hickman M, Campbell R. Peer-led interventions to prevent tobacco, alcohol and/or drug use among young people aged 11-21 years: a systematic review and meta-analysis. *Addiction (Abingdon, England).* 2015;111(3):391-407.
- 9  
10 139. Pitt V, Lowe D, Hill S, Prictor M, Hetrick SE, Ryan R, et al. Consumer-providers of care for adult clients of statutory mental health services. *Cochrane Database Syst Rev.* 2013(3):CD004807.
- 11  
12 140. Raphael JL, Rueda A, Lion KC, Giordano TP. The role of lay health workers in pediatric chronic disease: a systematic review. *Acad Pediatr.* 2013;13(5):408-20.
- 13  
14 141. Stubbs B, Williams J, Shannon J, Gaughran F, Craig T. Peer support interventions seeking to improve physical health and lifestyle behaviours among people with serious mental illness: A systematic review. *International journal of mental health nursing.* 2016;25(6):484-95.
- 15  
16 142. Al-Jumah KA, Qureshi NA. Impact of pharmacist interventions on patients' adherence to antidepressants and patient-reported outcomes: a systematic review. *Patient Prefer Adherence.* 2012;6:87-100.
- 17  
18 143. Baroy J, Chung D, Frisch R, Apgar D, Slack MK. The impact of pharmacist immunization programs on adult immunization rates: A systematic review and meta-analysis. *Journal of the American Pharmacists Association : JAPhA.* 2016;56(4):418-26.
- 19  
20 144. Brown TJ, Todd A, O'Malley CL, Moore HJ, Husband AK, Bamba C, et al. Community pharmacy interventions for public health priorities: a systematic review of community pharmacy-delivered smoking, alcohol and weight management interventions 2016 2016/03/None.
- 21  
22 145. Davis EM, Packard KA, Jackevicius CA. The pharmacist role in predicting and improving medication adherence in heart failure patients. *Journal of managed care pharmacy : JMCP.* 2014;20(7):741-55.
- 23  
24 146. Garcia-Cardenas V, Armour C, Benrimoj SI, Martinez-Martinez F, Rotta I, Fernandez-Llimos F. Pharmacists' interventions on clinical asthma outcomes: a systematic review. *Eur Respir J.* 2016;47(4):1134-43.
- 25  
26 147. Kang JE, Han NY, Oh JM, Jin HK, Kim HA, Son IJ, et al. Pharmacist-involved care for patients with heart failure and acute coronary syndrome: a systematic review with qualitative and quantitative meta-analysis. *J Clin Pharm Ther.* 2016;41(2):145-57.
- 27  
28 148. Lindsey L, Husband A, Nazar H, Todd A. Promoting the early detection of cancer: A systematic review of community pharmacy-based education and screening interventions. *Cancer epidemiology.* 2015;39(5):673-81.
- 29  
30 149. Mekonnen AB, McLachlan AJ, Brien JA. Effectiveness of pharmacist-led medication reconciliation programmes on clinical outcomes at hospital transitions: a systematic review and meta-analysis. *BMJ open.* 2016.
- 31  
32 150. Mohammed MA, Moles RJ, Chen TF. Impact of Pharmaceutical Care Interventions on Health-Related Quality-of-Life Outcomes: A Systematic Review and Meta-analysis. *The Annals of pharmacotherapy.* 2016;50(10):862-81.
- 33  
34 151. Nazar H, Nazar Z, Portlock J, Todd A, Slight SP. A systematic review of the role of community pharmacies in improving the transition from secondary to primary care. *Br J Clin Pharmacol.* 2015;80(5):936-48.
- 35  
36 152. Obreli-Neto PR, Marques Dos Reis T, Guidoni CM, Giroto E, Guerra ML, de Oliveira Baldoni A, et al. A Systematic Review of the Effects of Continuing Education Programs on Providing Clinical Community Pharmacy Services. *Am J Pharm Educ.* 2016;80(5):88.
- 37  
38 153. O'Neal KS, Crosby KM. What is the Role of the Pharmacist in Obesity Management? *Current obesity reports.* 2014;3(3):298-306.
- 39  
40  
41  
42  
43  
44  
45  
46  
47  
48  
49  
50  
51  
52  
53  
54  
55  
56  
57  
58  
59  
60

- 1  
2  
3 154. Pande S, Hiller JE, Nkansah N, Bero L. The effect of pharmacist-provided non-dispensing  
4 services on patient outcomes, health service utilisation and costs in low- and middle-income  
5 countries. *Cochrane Database Syst Rev.* 2013(2):CD010398.
- 6 155. Paudyal V, Watson MC, Sach T, Porteous T, Bond CM, Wright DJ, et al. Are pharmacy-based  
7 minor ailment schemes a substitute for other service providers? A systematic review. *Br J Gen Pract.*  
8 2013;63(612):e472-81.
- 9 156. Renaudin P, Boyer L, Esteve MA, Bertault-Peres P, Auquier P, Honore S. Do pharmacist-led  
10 medication reviews in hospitals help reduce hospital readmissions? A systematic review and meta-  
11 analysis. *British journal of clinical pharmacology.* 2016.
- 12 157. Riordan DO, Walsh KA, Galvin R, Sinnott C, Kearney PM, Byrne S. The effect of pharmacist-  
13 led interventions in optimising prescribing in older adults in primary care: A systematic review. *SAGE*  
14 *Open Med.* 2016;4:2050312116652568.
- 15 158. Sabater-Hernández D, Sabater-Galindo M, Fernandez-Llimos F, Rotta I, Hossain LN, Durks D,  
16 et al. A Systematic Review of Evidence-Based Community Pharmacy Services Aimed at the  
17 Prevention of Cardiovascular Disease. *Journal of managed care & specialty pharmacy.*  
18 2016;22(6):699-713.
- 19 159. Saberi P, Dong BJ, Johnson MO, Greenblatt RM, Cocohoba JM. The impact of HIV clinical  
20 pharmacists on HIV treatment outcomes: a systematic review. *Patient Prefer Adherence.*  
21 2012;6:297-322.
- 22 160. Salgado TM, Moles R, Benrimoj SI, Fernandez-Llimos F. Pharmacists' interventions in the  
23 management of patients with chronic kidney disease: a systematic review. *Nephrol Dial Transplant.*  
24 2012;27(1):276-92.
- 25 161. van Eikenhorst L, Salema NE, Anderson C. A systematic review in select countries of the role  
26 of the pharmacist in consultations and sales of non-prescription medicines in community pharmacy.  
27 *Research in social & administrative pharmacy : RSAP.* 2017;13(1):17-38.
- 28 162. Walsh KA, O'Riordan D, Kearney PM, Timmons S, Byrne S. Improving the appropriateness of  
29 prescribing in older patients: a systematic review and meta-analysis of pharmacists' interventions in  
30 secondary care. *Age Ageing.* 2016;45(2):201-9.
- 31 163. Wang T, Benedict N, Olsen KM, Luan R, Zhu X, Zhou N, et al. Effect of critical care  
32 pharmacist's intervention on medication errors: A systematic review and meta-analysis of  
33 observational studies. *Journal of critical care.* 2015;30(5):1101-6.
- 34 164. Zhou S, Sheng XY, Xiang Q, Wang ZN, Zhou Y, Cui YM. Comparing the effectiveness of  
35 pharmacist-managed warfarin anticoagulation with other models: a systematic review and meta-  
36 analysis. *J Clin Pharm Ther.* 2016;41(6):602-11.
- 37 165. Khangura JK FG, Perera R, Rowe BH, Shepperd S. Primary care professionals providing  
38 non-urgent care in hospital emergency departments. *Cochrane Database of Systematic Reviews.*  
39 2012.
- 40 166. Kim SL, Tarn DM. Effect of Primary Care Involvement on End-of-Life Care Outcomes: A  
41 Systematic Review. *J Am Geriatr Soc.* 2016;64(10):1968-74.
- 42 167. Hardy M, Johnson L, Sharples R, Boynes S, Irving D. Does radiography advanced practice  
43 improve patient outcomes and health service quality? A systematic review. *The British journal of*  
44 *radiology.* 2016.
- 45 168. Baik SH, Gallo LC, Wells KJ. Patient Navigation in Breast Cancer Treatment and Survivorship:  
46 A Systematic Review. *Journal of clinical oncology : official journal of the American Society of Clinical*  
47 *Oncology.* 2016;34(30):3686-96.
- 48 169. Ahl A, Mikocka-Walus A, Gordon A, Andrews JM. Are self-administered or minimal therapist  
49 contact psychotherapies an effective treatment for irritable bowel syndrome (IBS): a systematic  
50 review. *Journal of psychosomatic research.* 2013;75(2):113-20.
- 51 170. Ahmad Sharoni SK, Minhat HS, Mohd Zulkefli NA, Baharom A. Health education programmes  
52 to improve foot self-care practices and foot problems among older people with diabetes: a  
53 systematic review. *International journal of older people nursing.* 2016;11(3):214-39.
- 54  
55  
56  
57  
58  
59  
60

- 1  
2  
3 171. Brady TJ, Murphy L, O'Colmain BJ, Beauchesne D, Daniels B, Greenberg M, et al. A meta-  
4 analysis of health status, health behaviors, and healthcare utilization outcomes of the Chronic  
5 Disease Self-Management Program. *Prev Chronic Dis.* 2013;10:120112.
- 6 172. Heneghan CJ, Garcia-Alamino JM, Spencer EA, Ward AM, Perera R, Bankhead C, et al. Self-  
7 monitoring and self-management of oral anticoagulation. *Cochrane Database Syst Rev.*  
8 2016;7:CD003839.
- 9 173. Howcroft M, Walters EH, Wood-Baker R, Walters JA. Action plans with brief patient  
10 education for exacerbations in chronic obstructive pulmonary disease. *Cochrane Database Syst Rev.*  
11 2016;12:CD005074.
- 12 174. Jansons PS, Haines TP, O'Brien L. Interventions to achieve ongoing exercise adherence for  
13 adults with chronic health conditions who have completed a supervised exercise program:  
14 systematic review and meta-analysis. *Clin Rehabil.* 2017;31(4):465-77.
- 15 175. Kopke S, Solari A, Khan F, Heesen C, Giordano A. Information provision for people with  
16 multiple sclerosis. *Cochrane Database Syst Rev.* 2014(4):CD008757.
- 17 176. Leidy Johanna Rueda DaDLMd, C. The efficacy of telephone use to assist and improve the  
18 wellbeing of family caregivers of persons with chronic diseases: a systematic review. *JB*  
19 *Library of Systematic Reviews.* 2015.
- 20 177. Mayo-Wilson E, Montgomery P. Media-delivered cognitive behavioural therapy and  
21 behavioural therapy (self-help) for anxiety disorders in adults. *Cochrane Database Syst Rev.*  
22 2013(9):CD005330.
- 23 178. McDermott MS, While AE. Maximizing the healthcare environment: A systematic review  
24 exploring the potential of computer technology to promote self-management of chronic illness in  
25 healthcare settings. *Patient education and counseling.* 2013;92(1):13-22.
- 26 179. Millard T, Elliott J, Girdler S. Self-management education programs for people living with  
27 HIV/AIDS: a systematic review. *AIDS Patient Care STDS.* 2013;27(2):103-13.
- 28 180. Richardson SJ, Brooks HL, Bramley G, Coleman JJ. Evaluating the effectiveness of self-  
29 administration of medication (SAM) schemes in the hospital setting: a systematic review of the  
30 literature. *PLoS One.* 2014;9(12):e113912.
- 31 181. Urquhart C, Currell R, Harlow F, Callow L. Home uterine monitoring for detecting preterm  
32 labour. *Cochrane Database Syst Rev.* 2017;2:CD006172.
- 33 182. O'Sullivan JW, Harvey RT, Glasziou PP, McCullough A. Written information for patients (or  
34 parents of child patients) to reduce the use of antibiotics for acute upper respiratory tract infections  
35 in primary care. *Cochrane Database of Systematic Reviews.* 2016.
- 36 183. Aubin M, Giguère, A., Martin, M., Verreault, R., Fitch, M. I., Kazanjian, A., Carmichael, P. H.  
37 Interventions to improve continuity of care in the follow-up of patients with cancer. *Cochrane*  
38 *Database of Systematic Reviews.* 2012.
- 39 184. Balogh R, McMorris CA, Lunsy Y, Ouellette-Kuntz H, Bourne L, Colantonio A, et al.  
40 Organising healthcare services for persons with an intellectual disability. *Cochrane Database Syst*  
41 *Rev.* 2016;4:CD007492.
- 42 185. Baptista DR, Wiens A, Pontarolo R, Regis L, Reis WC, Correr CJ. The chronic care model for  
43 type 2 diabetes: a systematic review. *Diabetology & metabolic syndrome.* 2016;8(1):7.
- 44 186. Bhuyan SS, Chandak A, Smith P, Carlton EL, Duncan K, Gentry D. Integration of public health  
45 and primary care: A systematic review of the current literature in primary care physician mediated  
46 childhood obesity interventions. *Obesity research & clinical practice.* 2015;9(6):539-52.
- 47 187. Busetto L, Luijkx KG, Elissen AM, Vrijhoef HJ. Intervention types and outcomes of integrated  
48 care for diabetes mellitus type 2: a systematic review. *J Eval Clin Pract.* 2016;22(3):299-310.
- 49 188. Desmedt M, Vertriest S, Hellings J, Bergs J, Dessers E, Vankrunkelsven P, et al. Economic  
50 Impact of Integrated Care Models for Patients with Chronic Diseases: A Systematic Review. *Value in*  
51 *Health.* 2016;19(6):892-902.
- 52  
53  
54  
55  
56  
57  
58  
59  
60



189. Driscoll A, Meagher S, Kennedy R, Hay M, Banerji J, Campbell D, et al. What is the impact of systems of care for heart failure on patients diagnosed with heart failure: a systematic review. *BMC cardiovascular disorders*. 2016.
190. Grant SJ, Frawley J, Bensoussan A. Process of care in outpatient Integrative healthcare facilities: a systematic review of clinical trials. *BMC Health Serv Res*. 2015;15:322.
191. Hopman P, de Bruin SR, Forjaz MJ, Rodriguez-Blazquez C, Tonnara G, Lemmens LC, et al. Effectiveness of comprehensive care programs for patients with multiple chronic conditions or frailty: A systematic literature review. *Health policy (Amsterdam, Netherlands)*. 2016;120(7):818-32.
192. Hwang W, Chang J, Laclair M, Paz H. Effects of integrated delivery system on cost and quality. *Am J Manag Care*. 2013;19(5):e175-84.
193. Stellefson M, Dipnarine K, Stopka C. The chronic care model and diabetes management in US primary care settings: a systematic review. *Prev Chronic Dis*. 2013;10:E26.
194. Takeda A, Taylor SJ, Taylor RS, Khan F, Krum H, Underwood M. Clinical service organisation for heart failure. *Cochrane Database Syst Rev*. 2012(9):CD002752.
195. Tully PJ, Baumeister H. Collaborative care for comorbid depression and coronary heart disease: a systematic review and meta-analysis of randomised controlled trials. *BMJ Open*. 2015;5(12):e009128.
196. Woltmann E, Grogan-Kaylor A, Perron B, Georges H, Kilbourne AM, Bauer MS. Comparative effectiveness of collaborative chronic care models for mental health conditions across primary, specialty, and behavioral health care settings: systematic review and meta-analysis. *Am J Psychiatry*. 2012;169(8):790-804.
197. Yeung CH, Santesso N, Pai M, Kessler C, Key NS, Makris M, et al. Care models in the management of haemophilia: a systematic review. *Haemophilia*. 2016;22 Suppl 3:31-40.
198. Zhou K, Fitzpatrick T, Walsh N, Kim JY, Chou R, Lackey M, et al. Interventions to optimise the care continuum for chronic viral hepatitis: a systematic review and meta-analyses. *The Lancet Infectious diseases*. 2016;16(12):1409-22.
199. Kodjebacheva GD, Sabo T, Xiong J. Interventions to improve child-parent-medical provider communication: A systematic review. *Soc Sci Med*. 2016;166:120-7.
200. Nevis I. Educational Intervention in End-of-Life Care: An Evidence-Based Analysis. *Ont Health Technol Assess Ser*. 2014;14(17):1-30.
201. Zipkin DA, Umscheid CA, Keating NL, Allen E, Aung K, Beyth R, et al. Evidence-Based Risk Communication: A Systematic Review. *Annals of Internal Medicine*. 2014;161(4):270-80.
202. Dwamena F, Holmes-Rovner, M., Gaulden, C. M., Jorgenson, S., Sadigh, G., Sikorskii, A., Lewin, S., Smith, R. C., Coffey, J., Olomu, A. Interventions for providers to promote a patient-centred approach in clinical consultations. *Cochrane Database of Systematic Reviews*. 2012.
203. Legare F, Stacey D, Turcotte S, Cossi MJ, Kryworuchko J, Graham ID, et al. Interventions for improving the adoption of shared decision making by healthcare professionals. *Cochrane Database Syst Rev*. 2014(9):CD006732.
204. Coxeter P, Del Mar, C. B., McGregor, L., Beller, E. M. and Hoffmann, T. C. Interventions to facilitate shared decision making to address antibiotic use for acute respiratory infections in primary care. *Cochrane Database of Systematic Reviews*. 2015.
205. Feldman-Stewart D, O'Brien, M. A., Clayman, M. L., Davison, B. J., Jimbo, M., Labrecque, M., Martin, R. W. and Shepherd, H. Providing information about options in patient decision aids. *BMC medical informatics and decision making*. 2013.
206. Horey D, Kealy, M., Davey, M., Small, R., Crowther, C. A. Interventions for supporting pregnant women's decision-making about mode of birth after a caesarean. *Cochrane Database of Systematic Reviews*. 2013.
207. Kashaf MSaM, E. Does Shared Decision Making in Cancer Treatment Improve Quality of Life? A Systematic Literature Review. *Medical decision making : an international journal of the Society for Medical Decision Making*. 2015.

- 1  
2  
3 208. Nilsson C, Lundgren I, Smith V, Vehvilainen-Julkunen K, Nicoletti J, Devane D, et al. Women-centred interventions to increase vaginal birth after caesarean section (VBAC): A systematic review. *Midwifery*. 2015;31(7):657-63.
- 4  
5  
6 209. Peterson EB, Ostroff JS, DuHamel KN, D'Agostino TA, Hernandez M, Canzona MR, et al. Impact of provider-patient communication on cancer screening adherence: A systematic review. *Preventive medicine*. 2016;93:96-105.
- 7  
8  
9 210. Stacey D, Legare F, Lewis K, Barry MJ, Bennett CL, Eden KB, et al. Decision aids for people facing health treatment or screening decisions. *Cochrane Database Syst Rev*. 2017;4:CD001431.
- 10  
11  
12 211. van Weert JC, van Munster BC, Sanders R, Spijker R, Hooft L, Jansen J. Decision aids to help older people make health decisions: a systematic review and meta-analysis. *BMC Med Inform Decis Mak*. 2016;16:45.
- 13  
14  
15 212. Volk RJ, Linder SK, Lopez-Olivo MA, Kamath GR, Reuland DS, Saraykar SS, et al. Patient Decision Aids for Colorectal Cancer Screening: A Systematic Review and Meta-analysis. *American journal of preventive medicine*. 2016;51(5):779-91.
- 16  
17  
18 213. Smith TO, Hameed YA, Cross JL, Henderson C, Sahota O, Fox C. Enhanced rehabilitation and care models for adults with dementia following hip fracture surgery. *Cochrane Database Syst Rev*. 2015(6):CD010569.
- 19  
20  
21 214. Houben CH, Spruit MA, Groenen MT, Wouters EF, Janssen DJ. Efficacy of Advance Care Planning: A Systematic Review and Meta-Analysis. *Journal of the American Medical Directors Association*. 2014;15(7):477-89.
- 22  
23  
24 215. Lim CE, Ng RW, Cheng NC, Cigolini M, Kwok C, Brennan F. Advance care planning for haemodialysis patients. *Cochrane Database Syst Rev*. 2016;7:CD010737.
- 25  
26  
27 216. Sumalinog R, Harrington K, Dosani N, Hwang SW. Advance care planning, palliative care, and end-of-life care interventions for homeless people: A systematic review. *Palliative medicine*. 2017;31(2):109-19.
- 28  
29  
30 217. Weathers E, O'Caoimh R, Cornally N, Fitzgerald C, Kearns T, Coffey A, et al. Advance care planning: A systematic review of randomised controlled trials conducted with older adults. *Maturitas*. 2016;91:101-9.
- 31  
32  
33 218. Bleich SN, Sherrod C, Chiang A, Boyd C, Wolff J, DuGoff E, et al. Systematic Review of Programs Treating High-Need and High-Cost People With Multiple Chronic Diseases or Disabilities in the United States, 2008-2014. *Prev Chronic Dis*. 2015;12:E197.
- 34  
35  
36 219. Dieterich M, Irving CB, Bergman H, Khokhar MA, Park B, Marshall M. Intensive case management for severe mental illness. *Cochrane Database Syst Rev*. 2017;1:CD007906.
- 37  
38  
39 220. Gillies D, Buykx P, Parker AG, Hetrick SE. Consultation liaison in primary care for people with mental disorders. *Cochrane Database Syst Rev*. 2015(9):CD007193.
- 40  
41  
42 221. Hickam DH, Weiss JW, Guise JM, Buckley D, Motu'apuaka M, Graham E, et al. Outpatient Case Management for Adults With Medical Illness and Complex Care Needs. *Outpatient Case Management for Adults With Medical Illness and Complex Care Needs*. AHRQ Comparative Effectiveness Reviews. Rockville (MD)2013.
- 43  
44  
45 222. Huntley AL, Johnson R, King A, Morris RW, Purdy S. Does case management for patients with heart failure based in the community reduce unplanned hospital admissions? A systematic review and meta-analysis. *BMJ open*. 2016.
- 46  
47  
48 223. Joo JY, Liu MF. Case management effectiveness in reducing hospital use: a systematic review. *International nursing review*. 2016.
- 49  
50  
51 224. Khanassov V, Vedel I. Family Physician-Case Manager Collaboration and Needs of Patients With Dementia and Their Caregivers: A Systematic Mixed Studies Review. *Annals of family medicine*. 2016.
- 52  
53  
54 225. Reilly S, Miranda-Castillo C, Malouf R, Hoe J, Toot S, Challis D, et al. Case management approaches to home support for people with dementia. *Cochrane Database Syst Rev*. 2015;1:CD008345.
- 55  
56  
57  
58  
59  
60

- 1  
2  
3 226. Somme D, Trouve H, Drame M, Gagnon D, Couturier Y, Saint-Jean O. Analysis of case  
4 management programs for patients with dementia: a systematic review. *Alzheimers Dement.*  
5 2012;8(5):426-36.  
6  
7 227. You EC, Dunt D, Doyle C, Hsueh A. Effects of case management in community aged care on  
8 client and carer outcomes: a systematic review of randomized trials and comparative observational  
9 studies. *BMC Health Serv Res.* 2012;12:395.  
10  
11 228. Tibingana-Ahimbisibwe B, Katabira C, Mpalampa L, Harrison RA. The effectiveness of  
12 adolescent-specific prenatal interventions on improving attendance and reducing harm during and  
13 after birth: a systematic review. *International journal of adolescent medicine and health.* 2016.  
14  
15 229. Fernandez Turienzo C, Sandall J, Peacock JL. Models of antenatal care to reduce and prevent  
16 preterm birth: a systematic review and meta-analysis. *BMJ Open.* 2016;6(1):e009044.  
17  
18 230. Ibrahim N, Michail, M. and Callaghan, P. The strengths based approach as a service delivery  
19 model for severe mental illness: A meta-analysis of clinical trials. *BMC Psychiatry.* 2014.  
20  
21 231. Jutkowitz E, Brasure M, Fuchs E, Shippee T, Kane RA, Fink HA, et al. Care-Delivery  
22 Interventions to Manage Agitation and Aggression in Dementia Nursing Home and Assisted Living  
23 Residents: A Systematic Review and Meta-analysis. *J Am Geriatr Soc.* 2016;64(3):477-88.  
24  
25 232. Kimmel AD, Martin EG, Galadima H, Bono RS, Tehrani AB, Cyrus JW, et al. Clinical outcomes  
26 of HIV care delivery models in the US: a systematic review. *AIDS care.* 2016;28(10):1-12.  
27  
28 233. Laver K, Milte R, Dyer S, Crotty M. A Systematic Review and Meta-Analysis Comparing Carer  
29 Focused and Dyadic Multicomponent Interventions for Carers of People With Dementia. *Journal of*  
30 *aging and health.* 2016.  
31  
32 234. Robertson J, Baines S, Emerson E, Hatton C. Service Responses to People with Intellectual  
33 Disabilities and Epilepsy: A Systematic Review. *J Appl Res Intellect Disabil.* 2017;30(1):1-32.  
34  
35 235. Fleeman N, Bradley PM, Lindsay B. Care delivery and self management strategies for children  
36 with epilepsy. *Cochrane Database Syst Rev.* 2015(12):CD006245.  
37  
38 236. Peytremann-Bridevaux I, Arditi C, Gex G, Bridevaux PO, Burnand B. Chronic disease  
39 management programmes for adults with asthma. *Cochrane Database Syst Rev.* 2015(5):CD007988.  
40  
41 237. Bird M, Anderson K, MacPherson S, Blair A. Do interventions with staff in long-term  
42 residential facilities improve quality of care or quality of life people with dementia? A systematic  
43 review of the evidence. *International psychogeriatrics.* 2016;28(12):1937-63.  
44  
45 238. Connell CJ, Endacott R, Jackman JA, Kiprillis NR, Sparkes LM, Cooper SJ. The effectiveness of  
46 education in the recognition and management of deteriorating patients: A systematic review. *Nurse*  
47 *education today.* 2016;44:133-45.  
48  
49 239. Moore PM, Rivera Mercado S, Grez Artigues M, Lawrie TA. Communication skills training for  
50 healthcare professionals working with people who have cancer. *Cochrane Database Syst Rev.*  
51 2013(3):CD003751.  
52  
53 240. Oliveira VC, Ferreira ML, Pinto RZ, Filho RF, Refshauge K, Ferreira PH. Effectiveness of  
54 Training Clinicians' Communication Skills on Patients' Clinical Outcomes: A Systematic Review. *J*  
55 *Manipulative Physiol Ther.* 2015;38(8):601-16.  
56  
57 241. Paneque M, Turchetti D, Jackson L, Lunt P, Houwink E, Skirton H. A systematic review of  
58 interventions to provide genetics education for primary care. *BMC family practice.* 2016;17:89.  
59  
60 242. Petriwskyj A, Parker, D., Brown Wilson, C. and Gibson, A. What Health and Aged Care Culture  
Change Models Mean for Residents and Their Families: A Systematic Review. *The Gerontologist.*  
2015.  
243. Seidu S, Walker NS, Bodicoat DH, Davies MJ, Khunti K. A systematic review of interventions  
targeting primary care or community based professionals on cardio-metabolic risk factor control in  
people with diabetes. *Diabetes Res Clin Pract.* 2016;113:1-13.  
244. Chan RJ, Webster J, Bowers A. End-of-life care pathways for improving outcomes in caring  
for the dying. *Cochrane Database Syst Rev.* 2016;2:CD008006.  
245. McCallum GB, Bailey EJ, Morris PS, Chang AB. Clinical pathways for chronic cough in children.  
*Cochrane Database Syst Rev.* 2014(9):CD006595.

- 1  
2  
3 246. Gordon SA, Reiter ER. Effectiveness of critical care pathways for head and neck cancer  
4 surgery: A systematic review. *Head & neck*. 2016;38(9):1421-7.
- 5 247. Niven DJ, Bastos JF, Stelfox HT. Critical Care Transition Programs and the Risk of Readmission  
6 or Death After Discharge From an ICU: A Systematic Review and Meta-Analysis. *Critical care*  
7 *medicine*. 2013;42(1):179-87.
- 8 248. Ambia J, Mandala J. A systematic review of interventions to improve prevention of mother-  
9 to-child HIV transmission service delivery and promote retention. *J Int AIDS Soc*. 2016;19(1):20309.
- 10 249. Brennan A, Browne JP, Horgan M. A systematic review of health service interventions to  
11 improve linkage with or retention in HIV care. *AIDS Care*. 2014;26(7):804-12.
- 12 250. Geldsetzer P, Yapa HM, Vaikath M, Ogbuaji O, Fox MP, Essajee SM, et al. A systematic review  
13 of interventions to improve postpartum retention of women in PMTCT and ART care. *J Int AIDS Soc*.  
14 2016;19(1):20679.
- 15 251. Maharaj R, Raffaele I, Wendon J. Rapid response systems: a systematic review and meta-  
16 analysis. *Critical care (London, England)*. 2015;19:254.
- 17 252. Fox MT, Persaud, M., Maimets, I., O'Brien, K., Brooks, D., Tregunno, D. and Schraa, E.  
18 Effectiveness of Acute Geriatric Unit Care Using Acute Care for Elders Components: A Systematic  
19 Review and Meta-Analysis. *Journal of the American Geriatrics Society*. 2012.
- 20 253. Atlantis E, Fahey P, Foster J. Collaborative care for comorbid depression and diabetes: a  
21 systematic review and meta-analysis. *BMJ Open*. 2014;4(4):e004706.
- 22 254. Cochrane A, Higgins NM, FitzGerald O, Gallagher P, Ashton J, Corcoran O, et al. Early  
23 interventions to promote work participation in people with regional musculoskeletal pain: a  
24 systematic review and meta-analysis. *Clin Rehabil*. 2017;31(11):1466-81.
- 25 255. Archer J, Bower, P., Gilbody, S., Lovell, K., Richards, D., Gask, L. Collaborative care for  
26 depression and anxiety problems. *Cochrane Database of Systematic Reviews*. 2012.
- 27 256. Bearne LM, Byrne AM, Segrave H, White CM. Multidisciplinary team care for people with  
28 rheumatoid arthritis: a systematic review and meta-analysis. *Rheumatol Int*. 2016;36(3):311-24.
- 29 257. Buecking B, Timmesfeld N, Riem S, Bliemel C, Hartwig E, Friess T, et al. Early orthogeriatric  
30 treatment of trauma in the elderly: a systematic review and metaanalysis. *Dtsch Arztebl Int*.  
31 2013;110(15):255-62.
- 32 258. Deschodt M, Flamaing J, Haentjens P, Boonen S, Milisen K. Impact of geriatric consultation  
33 teams on clinical outcome in acute hospitals: a systematic review and meta-analysis. *BMC Med*.  
34 2013;11:48.
- 35 259. Helou N, Dwyer A, Shaha M, Zanchi A. Multidisciplinary management of diabetic kidney  
36 disease: a systematic review and meta-analysis. *JBI database of systematic reviews and*  
37 *implementation reports*. 2016;14(7):169-207.
- 38 260. Hickman LD, Phillips JL, Newton PJ, Halcomb EJ, Al Abed N, Davidson PM. Multidisciplinary  
39 team interventions to optimise health outcomes for older people in acute care settings: A systematic  
40 review. *Archives of gerontology and geriatrics*. 2015;61(3):322-9.
- 41 261. Hubbeling D, Bertram R. Crisis resolution teams in the UK and elsewhere. *J Ment Health*.  
42 2012;21(3):285-95.
- 43 262. Kamper SJ, Apeldoorn AT, Chiarotto A, Smeets RJEM, Ostelo RWJG, Guzman J, et al.  
44 Multidisciplinary biopsychosocial rehabilitation for chronic low back pain: Cochrane systematic  
45 review and meta-analysis. *BMJ : British Medical Journal*. 2015;350:h444.
- 46 263. Korner M, Butof S, Muller C, Zimmermann L, Becker S, Bengel J. Interprofessional teamwork  
47 and team interventions in chronic care: A systematic review. *J Interprof Care*. 2016;30(1):15-28.
- 48 264. Leclerc BS, Blanchard L, Cantinotti M, Couturier Y, Gervais D, Lessard S, et al. The  
49 effectiveness of interdisciplinary teams in end-of-life palliative care: a systematic review of  
50 comparative studies. *Journal of palliative care*. 2014;30(1):44-54.
- 51 265. Lee JK, Slack MK, Martin J, Ehrman C, Chisholm-Burns M. Geriatric patient care by U.S.  
52 pharmacists in healthcare teams: systematic review and meta-analyses. *J Am Geriatr Soc*.  
53 2013;61(7):1119-27.
- 54  
55  
56  
57  
58  
59  
60



- 1  
2  
3 266. Mercedes A, Fairman P, Hogan L, Thomas R, Slyer JT. Effectiveness of structured  
4 multidisciplinary rounding in acute care units on length of stay and satisfaction of patients and staff:  
5 a quantitative systematic review. *JBIM database of systematic reviews and implementation reports*.  
6 2016;14(7):131-68.
- 7 267. Pillay B, Wootten AC, Crowe H, Corcoran N, Tran B, Bowden P, et al. The impact of  
8 multidisciplinary team meetings on patient assessment, management and outcomes in oncology  
9 settings: A systematic review of the literature. *Cancer treatment reviews*. 2015;42:56-72.
- 10 268. Reilly S, Planner C, Gask L, Hann M, Knowles S, Druss B, et al. Collaborative care approaches  
11 for people with severe mental illness. *Cochrane Database Syst Rev*. 2013(11):CD009531.
- 12 269. Schepman S, Hansen J, de Putter ID, Batenburg RS, de Bakker DH. The common  
13 characteristics and outcomes of multidisciplinary collaboration in primary health care: a systematic  
14 literature review. *Int J Integr Care*. 2015;15:e027.
- 15 270. Sharp WG, Volkert VM, Scahill L, McCracken CE, McElhanon B. A Systematic Review and  
16 Meta-Analysis of Intensive Multidisciplinary Intervention for Pediatric Feeding Disorders: How  
17 Standard Is the Standard of Care? *The Journal of pediatrics*. 2017;181:116-24.e4.
- 18 271. Wang SM, Hsiao LC, Ting IW, Yu TM, Liang CC, Kuo HL, et al. Multidisciplinary care in patients  
19 with chronic kidney disease: A systematic review and meta-analysis. *European journal of internal  
20 medicine*. 2015;26(8):640-5.
- 21 272. Yang GM, Neo SH, Lim SZ, Krishna LK. Effectiveness of Hospital Palliative Care Teams for  
22 Cancer Inpatients: A Systematic Review. *Journal of palliative medicine*. 2016;19(11):1156-65.
- 23 273. Chang AS, Berry A, Jones LJ, Sivasangari S. Specialist teams for neonatal transport to  
24 neonatal intensive care units for prevention of morbidity and mortality. *Cochrane Database Syst Rev*.  
25 2015(10):CD007485.
- 26 274. Goyder C, Atherton, H., Car, M., Heneghan, C. J. and Car, J. Email for clinical communication  
27 between healthcare professionals. *Cochrane Database of Systematic Reviews*. 2015.
- 28 275. Villa-Roel C, Nikel, T., Ospina, M., Voaklander, B., Campbell, S. and Rowe, B. H. Effectiveness  
29 of Educational Interventions to Increase Primary Care Follow-up for Adults Seen in the Emergency  
30 Department for Acute Asthma: A Systematic Review and Meta-analysis. *Academic emergency  
31 medicine : official journal of the Society for Academic Emergency Medicine*. 2015.
- 32 276. Walsh C, Siegler, E. L., Cheston, E., O'Donnell, H., Collins, S., Stein, D., Vawdrey, D. K.,  
33 Stetson, P. D. and Informatics Intervention Research, C. Provider-to-provider electronic  
34 communication in the era of meaningful use: a review of the evidence. *Journal of hospital medicine :  
35 an official publication of the Society of Hospital Medicine*. 2013.
- 36 277. Wu RC, Tran, K., Lo, V., O'Leary, K. J., Morra, D., Quan, S. D. and Perrier, L. Effects of clinical  
37 communication interventions in hospitals: a systematic review of information and communication  
38 technology adoptions for improved communication between clinicians. *International journal of  
39 medical informatics*. 2012.
- 40 278. Hesselink G, Schoonhoven L, Barach P, Spijker A, Gademan P, Kalkman C, et al. Improving  
41 patient handovers from hospital to primary care: a systematic review. *Ann Intern Med*.  
42 2012;157(6):417-28.
- 43 279. Luu NP, Pitts S, Petty B, Sawyer MD, Dennison-Himmelfarb C, Boonyasai RT, et al. Provider-  
44 to-Provider Communication during Transitions of Care from Outpatient to Acute Care: A Systematic  
45 Review. *J Gen Intern Med*. 2016;31(4):417-25.
- 46 280. Abraham J, Kannampallil T, Caskey RN, Kitsiou S. Emergency Department-Based Care  
47 Transitions for Pediatric Patients: A Systematic Review. *Pediatrics*. 2016;138(2):1-15.
- 48 281. Betz CL, O'Kane LS, Nehring WM, Lobo ML. Systematic review: Health care transition practice  
49 service models. *Nursing outlook*. 2016;64(3):229-43.
- 50 282. Bhawra J, Toulany A, Cohen E, Moore Hepburn C, Guttman A. Primary care interventions to  
51 improve transition of youth with chronic health conditions from paediatric to adult healthcare: a  
52 systematic review. *BMJ Open*. 2016;6(5):e011871.
- 53  
54  
55  
56  
57  
58  
59  
60

- 1  
2  
3 283. Clemente D, Leon L, Foster H, Minden K, Carmona L. Systematic review and critical appraisal  
4 of transitional care programmes in rheumatology. *Seminars in arthritis and rheumatism*.  
5 2016;46(3):372-9.
- 6 284. Embrett MG, Randall, G. E., Longo, C. J., Nguyen, T. and Mulvale, G. Effectiveness of Health  
7 System Services and Programs for Youth to Adult Transitions in Mental Health Care: A Systematic  
8 Review of Academic Literature. *Administration and policy in mental health*. 2015.
- 9 285. Findley MK, Cha E, Wong E, Faulkner MS. A Systematic Review of Transitional Care for  
10 Emerging Adults with Diabetes. *J Pediatr Nurs*. 2015;30(5):e47-62.
- 11 286. Kim H, Thyer BA. Does transitional care prevent older adults from rehospitalization? A  
12 review. *Journal of evidence-informed social work*. 2015;12(3):261-71.
- 13 287. Allen J, Hutchinson AM, Brown R, Livingston PM. Quality care outcomes following  
14 transitional care interventions for older people from hospital to home: a systematic review. *BMC*  
15 *Health Serv Res*. 2014;14:346.
- 16 288. Braet A, Weltens C, Sermeus W. Effectiveness of discharge interventions from hospital to  
17 home on hospital readmissions: a systematic review. *JBI database of systematic reviews and*  
18 *implementation reports*. 2016;14(2):106-73.
- 19 289. Branowicki PM, Vessey JA, Graham DA, McCabe MA, Clapp AL, Blaine K, et al. Meta-Analysis  
20 of Clinical Trials That Evaluate the Effectiveness of Hospital-Initiated Postdischarge Interventions on  
21 Hospital Readmission. *Journal for healthcare quality : official publication of the National Association*  
22 *for Healthcare Quality*. 2016.
- 23 290. Echevarria C, Brewin K, Horobin H, Bryant A, Corbett S, Steer J, et al. Early Supported  
24 Discharge/ Hospital At Home For Acute Exacerbation Of Chronic Obstructive Pulmonary Disease: A  
25 Review and Meta-Analysis. *COPD*. 2016;13(4):1-11.
- 26 291. Fearon P, Langhorne P. Services for reducing duration of hospital care for acute stroke  
27 patients. *Cochrane Database Syst Rev*. 2012(9):Cd000443.
- 28 292. Fox MT, Persaud M, Maimets I, Brooks D, O'Brien K, Tregunno D. Effectiveness of early  
29 discharge planning in acutely ill or injured hospitalized older adults: a systematic review and meta-  
30 analysis. *BMC Geriatr*. 2013;13:70.
- 31 293. Gonçalves-Bradley DC, Lannin NA, Clemson LM, Cameron ID, Shepperd S. Discharge planning  
32 from hospital. *The Cochrane Library*. 2016.
- 33 294. Guerin M, Grimmer, K. and Kumar, S. Community services' involvement in the discharge of  
34 older adults from hospital into the community. *International journal of integrated care*. 2013.
- 35 295. Loeffen EAH, te Poele EM, Tissing WJE, Boezen HM, de Bont ESJM. Very early discharge  
36 versus early discharge versus non-early discharge in children with cancer and febrile neutropenia.  
37 *Cochrane Database of Systematic Reviews*. 2016.
- 38 296. Meyer MJ, Teasell R, Thind A, Koval J, Speechley M. A Synthesis of Peer-Reviewed Literature  
39 on Team-Coordinated and Delivered Early Supported Discharge After Stroke. *Can J Neurol Sci*.  
40 2016;43(3):353-9.
- 41 297. Ospina MB, Mrklas K, Deuchar L, Rowe BH, Leigh R, Bhutani M, et al. A systematic review of  
42 the effectiveness of discharge care bundles for patients with COPD. *Thorax*. 2017;72(1):31-9.
- 43 298. Goncalves-Bradley DC, Iliffe S, Doll HA, Broad J, Gladman J, Langhorne P, et al. Early  
44 discharge hospital at home. *Cochrane Database Syst Rev*. 2017;6:Cd000356.
- 45 299. Lei Q, Wang X, Tan S, Xia X, Zheng H, Wu C. Fast-track programs versus traditional care in  
46 hepatectomy: a meta-analysis of randomized controlled trials. *Digestive surgery*. 2014;31(4-5):392-9.
- 47 300. Song W, Wang K, Zhang RJ, Dai QX, Zou SB. The enhanced recovery after surgery (ERAS)  
48 program in liver surgery: a meta-analysis of randomized controlled trials. *Springerplus*. 2016;5:207.
- 49 301. Wu SJ, Xiong XZ, Lu J, Cheng Y, Lin YX, Zhou RX, et al. Fast-Track Programs for Liver Surgery:  
50 A Meta-Analysis. *J Gastrointest Surg*. 2015;19(9):1640-52.
- 51 302. Zarea Gavgani V, Kazemi Majd F, Nosratnejad S, Golmohammadi A, Sadeghi-Bazargani H. The  
52 Efficacy of Written Information Intervention in Reduction of Hospital Re-admission Cost in Patients  
53 With Heart Failure; A Systematic Review and Meta-Analysis. *J Cardiovasc Thorac Res*. 2015;7(1):1-5.
- 54  
55  
56  
57  
58  
59  
60

- 1  
2  
3 303. Jones CE, Hollis RH, Wahl TS, Oriel BS, Itani KM, Morris MS, et al. Transitional care  
4 interventions and hospital readmissions in surgical populations: a systematic review. *American*  
5 *journal of surgery*. 2016;212(2):327-35.
- 6 304. Roper KL, Ballard J, Rankin W, Cardarelli R. Systematic Review of Ambulatory Transitional  
7 Care Management (TCM) Visits on Hospital 30-Day Readmission Rates. *American journal of medical*  
8 *quality : the official journal of the American College of Medical Quality*. 2015;32(1):19-26.
- 9 305. Brown HC, Smith, H. J., Mori, R. and Noma, H. Giving women their own case notes to carry  
10 during pregnancy. *Cochrane Database of Systematic Reviews*. 2015.
- 11 306. Hawley G, Janamian, T., Jackson, C. and Wilkinson, S. A. In a maternity shared-care  
12 environment, what do we know about the paper hand-held and electronic health record: a  
13 systematic literature review. *BMC pregnancy and childbirth*. 2014.
- 14 307. Boksmati N, Butler-Henderson K, Anderson K, Sahama T. The Effectiveness of SMS  
15 Reminders on Appointment Attendance: a Meta-Analysis. *J Med Syst*. 2016;40(4):90.
- 16 308. Guy R, Hocking, J., Wand, H., Stott, S., Ali, H. and Kaldor, J. How effective are short message  
17 service reminders at increasing clinic attendance? A meta-analysis and systematic review. *Health*  
18 *services research*. 2012.
- 19 309. McLean S, Gee M, Booth A, Salway S, Nancarrow S, Cobb M, et al. Targeting the Use of  
20 Reminders and Notifications for Uptake by Populations (TURNUP): a systematic review and evidence  
21 synthesis. *Health Services and delivery research*. 2014;34:1-184.
- 22 310. Harvey H, Reissland N, Mason J. Parental reminder, recall and educational interventions to  
23 improve early childhood immunisation uptake: A systematic review and meta-analysis. *Vaccine*.  
24 2015;33(25):2862-80.
- 25 311. Chapman SM, Wray J, Oulton K, Peters MJ. Systematic review of paediatric track and trigger  
26 systems for hospitalised children. *Resuscitation*. 2016;109:87-109.
- 27 312. Robinson JR, Huth H, Jackson GP. Review of information technology for surgical patient care.  
28 *J Surg Res*. 2016;203(1):121-39.
- 29 313. Liu Q, Abba K, Alejandria MM, Sinclair D, Balanag VM, Lansang MA. Reminder systems to  
30 improve patient adherence to tuberculosis clinic appointments for diagnosis and treatment.  
31 *Cochrane Database Syst Rev*. 2014(11):Cd006594.
- 32 314. Middleton P, Crowther CA. Reminder systems for women with previous gestational diabetes  
33 mellitus to increase uptake of testing for type 2 diabetes or impaired glucose tolerance. *Cochrane*  
34 *Database Syst Rev*. 2014(3):CD009578.
- 35 315. Riley P, Worthington HV, Clarkson JE, Beirne PV. Recall intervals for oral health in primary  
36 care patients. *Cochrane Database Syst Rev*. 2013(12):CD004346.
- 37 316. Fenerty SD, West C, Davis SA, Kaplan SG, Feldman SR. The effect of reminder systems on  
38 patients' adherence to treatment. *Patient Prefer Adherence*. 2012;6:127-35.
- 39 317. Shultz CGaH, H. L. The Use of Medical Scribes in Health Care Settings: A Systematic Review  
40 and Future Directions. *Journal of the American Board of Family Medicine : JABFM*. 2015.
- 41 318. North JC, Jordan KC, Metos J, Hurdle JF. Nutrition Informatics Applications in Clinical  
42 Practice: a Systematic Review. *AMIA Annu Symp Proc*. 2015;2015:963-72.
- 43 319. Paterson M, Kinnear M, Bond C, McKinstry B. A systematic review of electronic multi-  
44 compartment medication devices with reminder systems for improving adherence to self-  
45 administered medications. *The International journal of pharmacy practice*. 2017;25(3):185-94.
- 46 320. Sinnemaki J, Sihvo S, Isojarvi J, Blom M, Airaksinen M, Mantyla A. Automated dose  
47 dispensing service for primary healthcare patients: a systematic review. *Syst Rev*. 2013;2:1.
- 48 321. Watson SJ, Aldus CF, Bond C, Bhattacharya D. Systematic review of the health and societal  
49 effects of medication organisation devices. *BMC health services research*. 2016;16(1):202.
- 50 322. Mekonnen AB, Abebe TB, McLachlan AJ, Brien JA. Impact of electronic medication  
51 reconciliation interventions on medication discrepancies at hospital transitions: a systematic review  
52 and meta-analysis. *BMC medical informatics and decision making*. 2016.
- 53  
54  
55  
56  
57  
58  
59  
60

- 1  
2  
3 323. Ciciriello S, Johnston R.V., Osborne, R. H., Wicks, I., deKroo, T., Clerehan, R., O'Neill, C.,  
4 Buchbinder, R. Multimedia educational interventions for consumers about prescribed and over-the-  
5 counter medications. *Cochrane Database of Systematic Reviews*. 2013.
- 6 324. Irizarry T, DeVito Dabbs A, Curran CR. Patient Portals and Patient Engagement: A State of the  
7 Science Review. *J Med Internet Res*. 2015;17(6):e148.
- 8 325. Kruse CS, Bolton K, Freriks G. The Effect of Patient Portals on Quality Outcomes and Its  
9 Implications to Meaningful Use: A Systematic Review. *Journal of medical Internet research*.  
10 2015;17(2):e44.
- 11 326. Vest JR, Jung HY, Ostrovsky A, Das LT, McGinty GB. Image Sharing Technologies and  
12 Reduction of Imaging Utilization: A Systematic Review and Meta-analysis. *J Am Coll Radiol*.  
13 2015;12(12 Pt B):1371-9 e3.
- 14 327. Baysari MT, Lehnbohm EC, Li L, Hargreaves A, Day RO, Westbrook JI. The effectiveness of  
15 information technology to improve antimicrobial prescribing in hospitals: A systematic review and  
16 meta-analysis. *International journal of medical informatics*. 2016;92:15-34.
- 17 328. Charlier N, Zupancic N, Fieuws S, Denhaerynck K, Zaman B, Moons P. Serious games for  
18 improving knowledge and self-management in young people with chronic conditions: a systematic  
19 review and meta-analysis. *J Am Med Inform Assoc*. 2016;23(1):230-9.
- 20 329. Fleming TM, Cheek C, Merry SN, Thabrew H, Bridgman H, Stasiak K, et al. Serious games for  
21 the treatment or prevention of depression: A systematic review. *Revista de Psicopatología y*  
22 *Psicología Clínica*. 2014;19(3).
- 23 330. Finkelstein J, Knight, A., Marinopoulos, S., Gibbons, M. C., Berger, Z., Aboumatar, H., Wilson,  
24 R. F., Lau, B. D., Sharma, R. and Bass, E. B. Enabling patient-centered care through health information  
25 technology. Evidence report/technology assessment. 2012.
- 26 331. Liu L, Stroulia E, Nikolaidis I, Miguel-Cruz A, Rios Rincon A. Smart homes and home health  
27 monitoring technologies for older adults: A systematic review. *Int J Med Inform*. 2016;91:44-59.
- 28 332. Brzan PP, Rotman E, Pajnkihar M, Klanjsek P. Mobile Applications for Control and Self  
29 Management of Diabetes: A Systematic Review. *J Med Syst*. 2016;40(9):210.
- 30 333. Burns K, Keating P, Free C. A systematic review of randomised control trials of sexual health  
31 interventions delivered by mobile technologies. *BMC Public Health*. 2016;16(1):778.
- 32 334. Connelly J, Kirk, A., Masthoff, J. and Macrury, S. The use of technology to promote physical  
33 activity in Type 2 diabetes management: a systematic review. *Diabetic medicine : a journal of the*  
34 *British Diabetic Association*. 2013.
- 35 335. Cui M, Wu X, Mao J, Wang X, Nie M. T2DM Self-Management via Smartphone Applications:  
36 A Systematic Review and Meta-Analysis. *PLoS One*. 2016;11(11):e0166718.
- 37 336. de Ridder M, Kim J, Jing Y, Khadra M, Nanan R. A systematic review on incentive-driven  
38 mobile health technology: As used in diabetes management. *J Telemed Telecare*. 2017;23(1):26-35.
- 39 337. El-Gayar O, Timsina P, Nawar N, Eid W. A systematic review of IT for diabetes self-  
40 management: are we there yet? *International journal of medical informatics*. 2013;82(8):637-52.
- 41 338. Finch L, Janda M, Loeschler LJ, Hacker E. Can skin cancer prevention be improved through  
42 mobile technology interventions? A systematic review. *Prev Med*. 2016;90:121-32.
- 43 339. Flores Mateo G, Granado-Font E, Ferré-Grau C, Montaña-Carreras X. Mobile Phone Apps to  
44 Promote Weight Loss and Increase Physical Activity: A Systematic Review and Meta-Analysis. *Journal*  
45 *of medical Internet research*. 2015;17(11):e253.
- 46 340. Fowler LA, Holt SL, Joshi D. Mobile technology-based interventions for adult users of alcohol:  
47 A systematic review of the literature. *Addictive behaviors*. 2016;62:25-34.
- 48 341. Hui CY, Walton R, McKinstry B, Jackson T, Parker R, Pinnock H. The use of mobile applications  
49 to support self-management for people with asthma: a systematic review of controlled studies to  
50 identify features associated with clinical effectiveness and adherence. *Journal of the American*  
51 *Medical Informatics Association : JAMIA*. 2016;24(3):619-32.
- 52 342. Lee J, Piao M, Byun A, Kim J. A Systematic Review and Meta-Analysis of Intervention for  
53 *Pediatric Obesity Using Mobile Technology*. *Stud Health Technol Inform*. 2016;225:491-4.
- 54  
55  
56  
57  
58  
59  
60



- 1  
2  
3 343. L'Engle KL, Mangone ER, Parcesepe AM, Agarwal S, Ippoliti NB. Mobile Phone Interventions  
4 for Adolescent Sexual and Reproductive Health: A Systematic Review. *Pediatrics*. 2016;138(3):1-16.  
5 344. McMillan KA, Kirk A, Hewitt A, MacRury S. A Systematic and Integrated Review of Mobile-  
6 Based Technology to Promote Active Lifestyles in People With Type 2 Diabetes. *J Diabetes Sci*  
7 *Technol*. 2017;11(2):299-307.  
8 345. Nour M, Chen J, Allman-Farinelli M. Efficacy and External Validity of Electronic and Mobile  
9 Phone-Based Interventions Promoting Vegetable Intake in Young Adults: Systematic Review and  
10 Meta-Analysis. *J Med Internet Res*. 2016;18(4):e58.  
11 346. Park C, Kim G, Patel I, Chang J, Tan X. Improving adherence to acne treatment: the emerging  
12 role of application software. *Clin Cosmet Investig Dermatol*. 2014;7:65-72.  
13 347. Park LG, Beatty A, Stafford Z, Whooley MA. Mobile Phone Interventions for the Secondary  
14 Prevention of Cardiovascular Disease. *Prog Cardiovasc Dis*. 2016;58(6):639-50.  
15 348. Smith C, Gold, J., Ngo, T. D., Sumpter, C. and Free, C. Mobile phone-based interventions for  
16 improving contraception use. *Cochrane Database of Systematic Reviews*. 2015.  
17 349. Stephens J, Allen J. Mobile phone interventions to increase physical activity and reduce  
18 weight: a systematic review. *J Cardiovasc Nurs*. 2013;28(4):320-9.  
19 350. Whittaker R, McRobbie H, Bullen C, Rodgers A, Gu Y. Mobile phone-based interventions for  
20 smoking cessation. *Cochrane Database Syst Rev*. 2016;4:CD006611.  
21 351. Zhao J, Freeman B, Li M. Can Mobile Phone Apps Influence People's Health Behavior  
22 Change? An Evidence Review. *J Med Internet Res*. 2016;18(11):e287.  
23 352. Whitehead L, Seaton P. The Effectiveness of Self-Management Mobile Phone and Tablet  
24 Apps in Long-term Condition Management: A Systematic Review. *Journal of medical Internet*  
25 *research*. 2016;18(5):e97.  
26 353. Ganguli A, Clewell J, Shillington AC. The impact of patient support programs on adherence,  
27 clinical, humanistic, and economic patient outcomes: a targeted systematic review. *Patient Prefer*  
28 *Adherence*. 2016;10:711-25.  
29 354. Maher CA, Lewis LK, Ferrar K, Marshall S, De Bourdeaudhuij I, Vandelanotte C. Are health  
30 behavior change interventions that use online social networks effective? A systematic review.  
31 *Journal of medical Internet research*. 2014;16(2):e40.  
32 355. Smailhodzic E, Hooijsma W, Boonstra A, Langley DJ. Social media use in healthcare: A  
33 systematic review of effects on patients and on their relationship with healthcare professionals.  
34 *BMC Health Serv Res*. 2016;16:442.  
35 356. Välimäki M, Athanasopoulou C, Lahti M, Adams CE. Effectiveness of Social Media  
36 Interventions for People With Schizophrenia: A Systematic Review and Meta-Analysis. *Journal of*  
37 *medical Internet research*. 2016;18(4):e92.  
38 357. Dennis SM, Harris, M., Lloyd, J., Powell Davies, G., Faruqi, N. and Zwar, N. Do people with  
39 existing chronic conditions benefit from telephone coaching? A rapid review. *Australian health*  
40 *review : a publication of the Australian Hospital Association*. 2013.  
41 358. Sawesi S, Rashrash M, Phalakornkule K, Carpenter JS, Jones JF. The Impact of Information  
42 Technology on Patient Engagement and Health Behavior Change: A Systematic Review of the  
43 Literature. *JMIR medical informatics*. 2016;4(1):e1.  
44 359. O'Rourke L, Humphris G, Baldacchino A. Electronic communication based interventions for  
45 hazardous young drinkers: A systematic review. *Neuroscience and biobehavioral reviews*.  
46 2016;68:880-90.  
47 360. Arambepola C, Ricci-Cabello I, Manikavasagam P, Roberts N, French DP, Farmer A. The  
48 Impact of Automated Brief Messages Promoting Lifestyle Changes Delivered Via Mobile Devices to  
49 People with Type 2 Diabetes: A Systematic Literature Review and Meta-Analysis of Controlled Trials.  
50 *Journal of medical Internet research*. 2016;18(4):e86.  
51 361. Badawy SM, Kuhns LM. Economic Evaluation of Text-Messaging and Smartphone-Based  
52 Interventions to Improve Medication Adherence in Adolescents with Chronic Health Conditions: A  
53 Systematic Review. *JMIR mHealth and uHealth*. 2016;4(4):e121.  
54  
55  
56  
57  
58  
59  
60

- 1  
2  
3 362. Posadzki P, Mastellos N, Ryan R, Gunn LH, Felix LM, Pappas Y, et al. Automated telephone  
4 communication systems for preventive healthcare and management of long-term conditions.  
5 Cochrane Database Syst Rev. 2016;12:CD009921.  
6  
7 363. Nieuwboer CC, Fukkink RG, Hermanns JM. Peer and professional parenting support on the  
8 Internet: a systematic review. *Cyberpsychol Behav Soc Netw*. 2013;16(7):518-28.  
9  
10 364. Gentry S, Hmmt van-Velthoven, M., Car, L. T., Car, J. Telephone delivered interventions for  
11 reducing morbidity and mortality in people with HIV infection. *Cochrane Database of Systematic  
12 Reviews*. 2013.  
13  
14 365. Hvidt EA, Ploug, T. and Holm, S. The impact of telephone crisis services on suicidal users: a  
15 systematic review of the past 45 years. *Mental Health Review Journal*. 2016;21(2):141-60.  
16  
17 366. Inglis SC, Clark RA, Dierckx R, Prieto-Merino D, Cleland JG. Structured telephone support or  
18 non-invasive telemonitoring for patients with heart failure. *Cochrane Database Syst Rev*.  
19 2015(10):CD007228.  
20  
21 367. Jayakody A, Bryant J, Carey M, Hobden B, Dodd N, Sanson-Fisher R. Effectiveness of  
22 interventions utilising telephone follow up in reducing hospital readmission within 30 days for  
23 individuals with chronic disease: a systematic review. *BMC health services research*. 2016.  
24  
25 368. Lavender T, Richens Y, Milan SJ, Smyth RM, Dowswell T. Telephone support for women  
26 during pregnancy and the first six weeks postpartum. *Cochrane Database Syst Rev*.  
27 2013(7):CD009338.  
28  
29 369. Lins S, Hayder-Beichel D, Rucker G, Motschall E, Antes G, Meyer G, et al. Efficacy and  
30 experiences of telephone counselling for informal carers of people with dementia. *Cochrane  
31 Database Syst Rev*. 2014(9):CD009126.  
32  
33 370. Stead LF, Hartmann-Boyce J, Perera R, Lancaster T. Telephone counselling for smoking  
34 cessation. *Cochrane Database Syst Rev*. 2013(8):CD002850.  
35  
36 371. Yasmin F, Banu B, Zakir SM, Sauerborn R, Ali L, Souares A. Positive influence of short  
37 message service and voice call interventions on adherence and health outcomes in case of chronic  
38 disease care: a systematic review. *BMC Med Inform Decis Mak*. 2016;16:46.  
39  
40 372. Zhou M, Holden L, Bedard G, Zeng L, Lam H, Chu D, et al. The utilization of telephone follow-  
41 up in the advanced cancer population: a review of the literature. *Journal of comparative  
42 effectiveness research*. 2012;1(6):509-17.  
43  
44 373. Vargas G, Cajita MI, Whitehouse E, Han HR. Use of Short Messaging Service for Hypertension  
45 Management: A Systematic Review. *The Journal of cardiovascular nursing*. 2016.  
46  
47 374. Aardoom JJ, Dingemans AE, Spinhoven P, Van Furth EF. Treating eating disorders over the  
48 internet: a systematic review and future research directions. *Int J Eat Disord*. 2013;46(6):539-52.  
49  
50 375. Annaim A, Lassiter M, Viera AJ, Ferris M. Interactive media for parental education on  
51 managing children chronic condition: a systematic review of the literature. *BMC pediatrics*.  
52 2015;15(1):201.  
53  
54 376. Beishuizen CR, Stephan BC, van Gool WA, Brayne C, Peters RJ, Andrieu S, et al. Web-Based  
55 Interventions Targeting Cardiovascular Risk Factors in Middle-Aged and Older People: A Systematic  
56 Review and Meta-Analysis. *Journal of medical Internet research*. 2016;18(3):e55.  
57  
58 377. Brijnath B, Protheroe J, Mahtani KR, Antoniadou J. Do Web-based Mental Health Literacy  
59 Interventions Improve the Mental Health Literacy of Adult Consumers? Results From a Systematic  
60 Review. *J Med Internet Res*. 2016;18(6):e165.  
378. Brown M, Glendenning A, Hoon AE, John A. Effectiveness of Web-Delivered Acceptance and  
Commitment Therapy in Relation to Mental Health and Well-Being: A Systematic Review and Meta-  
Analysis. *Journal of medical Internet research*. 2016;18(8):e221.  
379. Chan JY, Hirai, H. W. and Tsoi, K. K. Can computer-assisted cognitive remediation improve  
employment and productivity outcomes of patients with severe mental illness? A meta-analysis of  
prospective controlled trials. *Journal of psychiatric research*. 2015.  
380. Chebli JL, Blaszczynski A, Gainsbury SM. Internet-Based Interventions for Addictive  
Behaviours: A Systematic Review. *Journal of gambling studies*. 2016;32(4):1279-304.

- 1  
2  
3 381. Cotter AP, Durant N, Agne AA, Cherrington AL. Internet interventions to support lifestyle  
4 modification for diabetes management: a systematic review of the evidence. *J Diabetes*  
5 *Complications*. 2014;28(2):243-51.
- 6 382. de Jong CC, Ros WJ, Schrijvers G. The effects on health behavior and health outcomes of  
7 Internet-based asynchronous communication between health providers and patients with a chronic  
8 condition: a systematic review. *Journal of medical Internet research*. 2014;16(1):e19.
- 9 383. Dettore D, Pozza A, Andersson G. Efficacy of technology-delivered cognitive behavioural  
10 therapy for OCD versus control conditions, and in comparison with therapist-administered CBT:  
11 meta-analysis of randomized controlled trials. *Cogn Behav Ther*. 2015;44(3):190-211.
- 12 384. Devi R, Singh SJ, Powell J, Fulton EA, Igbinedion E, Rees K. Internet-based interventions for  
13 the secondary prevention of coronary heart disease. *Cochrane Database Syst Rev*.  
14 2015(12):CD009386.
- 15 385. Dolemeier R, Tietjen A, Kersting A, Wagner B. Internet-based interventions for eating  
16 disorders in adults: a systematic review. *BMC Psychiatry*. 2013;13:207.
- 17 386. Fish J, Brimson J, Lynch S. Mindfulness Interventions Delivered by Technology Without  
18 Facilitator Involvement: What Research Exists and What Are the Clinical Outcomes? *Mindfulness*.  
19 2016;7(5):1011-23.
- 20 387. Foster C, Richards J, Thorogood M, Hillsdon M. Remote and web 2.0 interventions for  
21 promoting physical activity. *Cochrane Database of Systematic Reviews*. 2013.
- 22 388. Garg S, Garg D, Turin TC, Chowdhury MF. Web-Based Interventions for Chronic Back Pain: A  
23 Systematic Review. *Journal of medical Internet research*. 2016;18(7):e139.
- 24 389. Graham AL, Carpenter KM, Cha S, Cole S, Jacobs MA, Raskob M, et al. Systematic review and  
25 meta-analysis of Internet interventions for smoking cessation among adults. *Substance abuse and*  
26 *rehabilitation*. 2016.
- 27 390. Grist RaC, K. Computerised Cognitive Behavioural Therapy for Common Mental Health  
28 Disorders, What Works, for Whom Under What Circumstances? A Systematic Review and Meta-  
29 analysis. *Journal of contemporary psychotherapy*. 2013.
- 30 391. Hidalgo-Mazzei D, Mateu A, Reinares M, Matic A, Vieta E, Colom F. Internet-based  
31 psychological interventions for bipolar disorder: Review of the present and insights into the future.  
32 *Journal of affective disorders*. 2015;188:1-13.
- 33 392. Hou SI, Charlery SA, Roberson K. Systematic literature review of Internet interventions  
34 across health behaviors. *Health Psychol Behav Med*. 2014;2(1):455-81.
- 35 393. Joo JY. Effectiveness of Web-Based Interventions for Managing Diabetes in Korea.  
36 *Computers, informatics, nursing : CIN*. 2016;34(12):587-600.
- 37 394. Kauppi K, Välimäki M, Hätönen H.M., Kuosmanen L.M., Warwick-Smith K. Information and  
38 communication technology based prompting for treatment compliance for people with serious  
39 mental illness. *Cochrane Database of Systematic Reviews*. 2014.
- 40 395. Kim AR, Park HA. Web-based Self-management Support Interventions for Cancer Survivors:  
41 A Systematic Review and Meta-analyses. *Studies in health technology and informatics*.  
42 2015;216:142-7.
- 43 396. Kreuze E, Jenkins C, Gregoski M, York J, Mueller M, Lamis DA, et al. Technology-enhanced  
44 suicide prevention interventions: A systematic review of the current state of the science. *Journal of*  
45 *telemedicine and telecare*. 2016;23(6):605-17.
- 46 397. L CaD, C. Effectiveness of web-based psychological interventions for depression: a meta-  
47 analysis. *International Journal of Mental Health and Addiction*. 2013.
- 48 398. Lai MH, Maniam T, Chan LF, Ravindran AV. Caught in the web: a review of web-based suicide  
49 prevention. *Journal of medical Internet research*. 2014;16(1):e30.
- 50 399. Lau Y, Htun TP, Wong SN, Tam WS, Klainin-Yobas P. Efficacy of Internet-Based Self-  
51 Monitoring Interventions on Maternal and Neonatal Outcomes in Perinatal Diabetic Women: A  
52 Systematic Review and Meta-Analysis. *Journal of medical Internet research*. 2016;18(8):e220.
- 53  
54  
55  
56  
57  
58  
59  
60

- 1  
2  
3 400. Lee EW, Denison FC, Hor K, Reynolds RM. Web-based interventions for prevention and  
4 treatment of perinatal mood disorders: a systematic review. *BMC pregnancy and childbirth*.  
5 2016;16(1):38.  
6  
7 401. Noh D, Park YS, Oh EG. Effectiveness of Telephone-Delivered Interventions Following Suicide  
8 Attempts: A Systematic Review. *Archives of psychiatric nursing*. 2016;30(1):114-9.  
9 402. Olthuis JV, Watt MC, Bailey K, Hayden JA, Stewart SH. Therapist-supported Internet cognitive  
10 behavioural therapy for anxiety disorders in adults. *Cochrane Database Syst Rev*. 2016;3:CD011565.  
11 403. Pal K, Eastwood SV, Michie S, Farmer AJ, Barnard ML, Peacock R, et al. Computer-based  
12 diabetes self-management interventions for adults with type 2 diabetes mellitus. *Cochrane Database*  
13 *Syst Rev*. 2013(3):CD008776.  
14 404. Păsărelu CR, Andersson G, Bergman Nordgren L, Dobrea A. Internet-delivered  
15 transdiagnostic and tailored cognitive behavioral therapy for anxiety and depression: a systematic  
16 review and meta-analysis of randomized controlled trials. *Cognitive behaviour therapy*.  
17 2016;46(1):1-28.  
18 405. Perry Y, Werner-Seidler A, Calear AL, Christensen H. Web-Based and Mobile Suicide  
19 Prevention Interventions for Young People: A Systematic Review. *J Can Acad Child Adolesc*  
20 *Psychiatry*. 2016;25(2):73-9.  
21 406. Podina IR, Mogoase C, David D, Szentagotai A, Dobrea A. A meta-analysis on the efficacy of  
22 technology mediated CBT for anxious children and adolescents. *Journal of Rational-Emotive &*  
23 *Cognitive-Behavior Therapy*. 2016;34(1).  
24 407. Ramdoss S, Machalicek W, Rispoli M, Mulloy A, Lang R, O'Reilly M. Computer-based  
25 interventions to improve social and emotional skills in individuals with autism spectrum disorders: a  
26 systematic review. *Dev Neurorehabil*. 2012;15(2):119-35.  
27 408. Reyes-Portillo JA, Mufson L, Greenhill LL, Gould MS, Fisher PW, Tarlow N, et al. Web-Based  
28 Interventions for Youth Internalizing Problems: A Systematic Review. *Journal of the American*  
29 *Academy of Child and Adolescent Psychiatry*. 2014;53(12):1254-70.e5.  
30 409. Richards J, Thorogood M, Hillsdon M, Foster C. Face-to-face versus remote and web 2.0  
31 interventions for promoting physical activity. *Cochrane Database Syst Rev*. 2013(9):CD010393.  
32 410. Saddichha S, Al-Desouki M, Lamia A, Linden IA, Krausz M. Online interventions for  
33 depression and anxiety - a systematic review. *Health Psychol Behav Med*. 2014;2(1):841-81.  
34 411. Sander L, Rausch L, Baumeister H. Effectiveness of Internet-Based Interventions for the  
35 Prevention of Mental Disorders: A Systematic Review and Meta-Analysis. *JMIR mental health*.  
36 2016;3(3):e38.  
37 412. Schlegl S, Bürger C, Schmidt L, Herbst N, Voderholzer U. The Potential of Technology-Based  
38 Psychological Interventions for Anorexia and Bulimia Nervosa: A Systematic Review and  
39 Recommendations for Future Research. *Journal of medical Internet research*. 2015;17(3):e85.  
40 413. Sherrington A, Newham JJ, Bell R, Adamson A, McColl E, Araujo-Soares V. Systematic review  
41 and meta-analysis of internet-delivered interventions providing personalized feedback for weight  
42 loss in overweight and obese adults. *Obes Rev*. 2016;17(6):541-51.  
43 414. Sijbrandij M, Kunovski I, Cuijpers P. Effectiveness of Internet-Delivered Cognitive Behavioral  
44 Therapy for Posttraumatic Stress Disorder: A Systematic Review and Meta-Analysis. *Depress Anxiety*.  
45 2016;33(9):783-91.  
46 415. Spijkerman MPJ, Pots WTM, Bohlmeijer ET. Effectiveness of online mindfulness-based  
47 interventions in improving mental health: A review and meta-analysis of randomised controlled  
48 trials. *Clinical Psychology Review*. 2016;45:102-14.  
49 416. Stelfefon M, Chaney B, Barry AE, Chavarria E, Tennant B, Walsh-Childers K, et al. Web 2.0  
50 chronic disease self-management for older adults: a systematic review. *Journal of medical Internet*  
51 *research*. 2013;15(2):e35.  
52 417. Taylor GMJ, Dalili MN, Semwal M, Civljak M, Sheikh A, Car J. Internet-based interventions for  
53 smoking cessation. *Cochrane Database Syst Rev*. 2017;9:CD007078.  
54  
55  
56  
57  
58  
59  
60



- 1  
2  
3 418. Twomey C, O'Reilly G. Effectiveness of a freely available computerised cognitive behavioural  
4 therapy programme (MoodGYM) for depression: Meta-analysis. *Aust N Z J Psychiatry*.  
5 2017;51(3):260-9.  
6  
7 419. Ye YY, Zhang YF, Chen J, Liu J, Li XJ, Liu YZ, et al. Internet-Based Cognitive Behavioral Therapy  
8 for Insomnia (ICBT-i) Improves Comorbid Anxiety and Depression-A Meta-Analysis of Randomized  
9 Controlled Trials. *PLoS One*. 2015;10(11):e0142258.  
10  
11 420. Zachariae R, Lyby MS, Ritterband LM, O'Toole MS. Efficacy of internet-delivered cognitive-  
12 behavioral therapy for insomnia - A systematic review and meta-analysis of randomized controlled  
13 trials. *Sleep medicine reviews*. 2015;30:1-10.  
14  
15 421. Eccleston C FE, Craig L, Duggan JB, Rosser BA, Keogh E. Psychological therapies  
16 (Internet?delivered) for the management of chronic pain in adults. *Cochrane Database of Systematic  
17 Reviews*. 2014.  
18  
19 422. Wootton BM. Remote cognitive-behavior therapy for obsessive-compulsive symptoms: A  
20 meta-analysis. *Clinical Psychology Review*. 2016;43:103-13.  
21  
22 423. Hall N, Boisvert M, Steele R. Telepractice in the assessment and treatment of individuals  
23 with aphasia: a systematic review. *Int J Telerehabil*. 2013;5(1):27-38.  
24  
25 424. Meyer B, Atherton H, Sawmynaden P, Car J. Email for communicating results of diagnostic  
26 medical investigations to patients. *Cochrane Database Syst Rev*. 2012(8):Cd007980.  
27  
28 425. Sawmynaden P, Atherton H, Majeed A, Car J. Email for the provision of information on  
29 disease prevention and health promotion. *Cochrane Database Syst Rev*. 2012;11:CD007982.  
30  
31 426. Atherton H, Sawmynaden, P., Sheikh, A., Majeed, A., Car, J. Email for clinical communication  
32 between patients/caregivers and healthcare professionals. *Cochrane Database of Systematic  
33 Reviews*. 2012.  
34  
35 427. de Jongh T, Gurol-Urganci I, Vodopivec-Jamsek V, Car J, Atun R. Mobile phone messaging for  
36 facilitating self-management of long-term illnesses. *Cochrane Database Syst Rev*. 2012;12:CD007459.  
37  
38 428. Ershad Sarabi R, Sadoughi F, Jamshidi Orak R, Bahaadinbeigy K. The Effectiveness of Mobile  
39 Phone Text Messaging in Improving Medication Adherence for Patients with Chronic Diseases: A  
40 Systematic Review. *Iran Red Crescent Med J*. 2016;18(5):e25183.  
41  
42 429. Finitis DJ, Pellowski JA, Johnson BT. Text message intervention designs to promote  
43 adherence to antiretroviral therapy (ART): a meta-analysis of randomized controlled trials. *PLoS One*.  
44 2014;9(2):e88166.  
45  
46 430. Head KJ, Noar SM, Iannarino NT, Grant Harrington N. Efficacy of text messaging-based  
47 interventions for health promotion: a meta-analysis. *Social science & medicine (1982)*. 2013;97:41-8.  
48  
49 431. Scott-Sheldon LA, Lantini R, Jennings EG, Thind H, Rosen RK, Salmoirago-Blotcher E, et al.  
50 Text Messaging-Based Interventions for Smoking Cessation: A Systematic Review and Meta-Analysis.  
51 *JMIR mHealth and uHealth*. 2016;4(2):e49.  
52  
53 432. Siopis G, Chey, T. and Allman-Farinelli, M. A systematic review and meta-analysis of  
54 interventions for weight management using text messaging. *Journal of human nutrition and dietetics*  
55 : the official journal of the British Dietetic Association. 2014.  
56  
57 433. Thakkar J, Kurup R, Laba TL, Santo K, Thiagalingam A, Rodgers A, et al. Mobile Telephone  
58 Text Messaging for Medication Adherence in Chronic Disease: A Meta-analysis. *JAMA Intern Med*.  
59 2016;176(3):340-9.  
60  
61 434. Vodopivec-Jamsek V, de Jongh T, Gurol-Urganci I, Atun R, Car J. Mobile phone messaging for  
62 preventive health care. *Cochrane Database Syst Rev*. 2012;12:CD007457.  
63  
64 435. Wald DS, Butt S, Bestwick JP. One-way versus two-way text messaging on improving  
65 medication adherence: meta-analysis of randomized trials. *The American journal of medicine*.  
66 2015;128(10):1139.e1-5.  
67  
68 436. Watson T, Simpson S, Hughes C. Text messaging interventions for individuals with mental  
69 health disorders including substance use: A systematic review. *Psychiatry research*. 2016;243:255-  
70 62.

- 1  
2  
3 437. Gurol-Urganci I, de Jongh, T., Vodopivec-Jamsek, V., Atun, R. and Car, J. Mobile phone  
4 messaging reminders for attendance at healthcare appointments. *Cochrane Database of Systematic*  
5 *Reviews*. 2013.
- 6 438. Direito A, Carraça E, Rawstorn J, Whittaker R, Maddison R. mHealth Technologies to  
7 Influence Physical Activity and Sedentary Behaviors: Behavior Change Techniques, Systematic  
8 Review and Meta-Analysis of Randomized Controlled Trials. *Annals of behavioral medicine : a*  
9 *publication of the Society of Behavioral Medicine*. 2016;51(2):226-39.
- 10 439. Lin H, Wu X. Intervention strategies for improving patient adherence to follow-up in the era  
11 of mobile information technology: a systematic review and meta-analysis. *PLoS One*.  
12 2014;9(8):e104266.
- 13 440. Alwashmi M, Hawboldt J, Davis E, Marra C, Gamble JM, Abu Ashour W. The Effect of  
14 Smartphone Interventions on Patients With Chronic Obstructive Pulmonary Disease Exacerbations: A  
15 Systematic Review and Meta-Analysis. *JMIR mHealth and uHealth*. 2016;4(3):e105.
- 16 441. Braun R, Catalani C, Wimbush J, Israelski D. Community health workers and mobile  
17 technology: a systematic review of the literature. *PLoS One*. 2013;8(6):e65772.
- 18 442. Afshin A, Babalola D, McLean M, Yu Z, Ma W, Chen CY, et al. Information Technology and  
19 Lifestyle: A Systematic Evaluation of Internet and Mobile Interventions for Improving Diet, Physical  
20 Activity, Obesity, Tobacco, and Alcohol Use. *Journal of the American Heart Association*. 2016;5(9).
- 21 443. Barello S, Triberti S, Graffigna G, Libreri C, Serino S, Hibbard J, et al. eHealth for Patient  
22 Engagement: A Systematic Review. *Front Psychol*. 2015;6:2013.
- 23 444. Berrouiguet S, Baca-García E, Brandt S, Walter M, Courtet P. Fundamentals for Future  
24 Mobile-Health (mHealth): A Systematic Review of Mobile Phone and Web-Based Text Messaging in  
25 Mental Health. *Journal of medical Internet research*. 2016;18(6):e135.
- 26 445. Cajita MI, Gleason KT, Han HR. A Systematic Review of mHealth-Based Heart Failure  
27 Interventions. *The Journal of cardiovascular nursing*. 2016;31(3):E10-22.
- 28 446. Capurro D, Ganzinger M, Perez-Lu J, Knaup P. Effectiveness of eHealth interventions and  
29 information needs in palliative care: a systematic literature review. *Journal of medical Internet*  
30 *research*. 2014;16(3):e72.
- 31 447. Chen YR, Schulz PJ. The Effect of Information Communication Technology Interventions on  
32 Reducing Social Isolation in the Elderly: A Systematic Review. *J Med Internet Res*. 2016;18(1):e18.
- 33 448. Conway N, Webster C, Smith B, Wake D. eHealth and the use of individually tailored  
34 information: A systematic review. *Health informatics journal*. 2016.
- 35 449. Free C, Phillips G, Watson L, Galli L, Felix L, Edwards P, et al. The effectiveness of mobile-  
36 health technologies to improve health care service delivery processes: a systematic review and  
37 meta-analysis. *PLoS Med*. 2013;10(1):e1001363.
- 38 450. Gregersen TL, Green A, Frausing E, Ringbaek T, Brondum E, Suppli Ulrik C. Do telemedical  
39 interventions improve quality of life in patients with COPD? A systematic review. *International*  
40 *journal of chronic obstructive pulmonary disease*. 2016;11:809-22.
- 41 451. Jackson BD, Gray K, Knowles SR, De Cruz P. EHealth Technologies in Inflammatory Bowel  
42 Disease: A Systematic Review. *Journal of Crohn's & colitis*. 2016;10(9):1103-21.
- 43 452. Jackson D, Roberts G, Wu ML, Ford R, Doyle C. A systematic review of the effect of  
44 telephone, internet or combined support for carers of people living with Alzheimer's, vascular or  
45 mixed dementia in the community. *Archives of gerontology and geriatrics*. 2016;66:218-36.
- 46 453. Koblauch H, Reinhardt SM, Lissau W, Jensen PL. The effect of telepsychiatric modalities on  
47 reduction of readmissions in psychiatric settings: A systematic review. *Journal of telemedicine and*  
48 *telecare*. 2016.
- 49 454. Lin MH, Yuan WL, Huang TC, Zhang HF, Mai JT, Wang JF. The clinical effectiveness of  
50 telemedicine for chronic heart failure: A systematic review and meta-analysis. *Minerva medica*.  
51 2016.
- 52  
53  
54  
55  
56  
57  
58  
59  
60



- 1  
2  
3 455. Naslund JA, Marsch LA, McHugo GJ, Bartels SJ. Emerging mHealth and eHealth interventions  
4 for serious mental illness: a review of the literature. *Journal of mental health (Abingdon, England)*.  
5 2015;24(5):1-12.
- 6 456. Omaki E, Rizzutti N, Shields W, Zhu J, McDonald E, Stevens MW, et al. A systematic review of  
7 technology-based interventions for unintentional injury prevention education and behaviour change.  
8 *Injury prevention : journal of the International Society for Child and Adolescent Injury Prevention*.  
9 2017;23(2):138-46.
- 10 457. Schnall R, Travers J, Rojas M, Carballo-Diéguez A. eHealth interventions for HIV prevention in  
11 high-risk men who have sex with men: a systematic review. *Journal of medical Internet research*.  
12 2014;16(5):e134.
- 13 458. Seo DC, Niu J. Evaluation of Internet-Based Interventions on Waist Circumference Reduction:  
14 A Meta-Analysis. *Journal of medical Internet research*. 2015;17(7):e181.
- 15 459. Su D, Zhou J, Kelley MS, Michaud TL, Siahpush M, Kim J, et al. Does telemedicine improve  
16 treatment outcomes for diabetes? A meta-analysis of results from 55 randomized controlled trials.  
17 *Diabetes Research & Clinical Practice*. 2016;116:136-48.
- 18 460. van der Meij E, Anema JR, Otten RH, Huirne JA, Schaafsma FG. The Effect of Perioperative E-  
19 Health Interventions on the Postoperative Course: A Systematic Review of Randomised and Non-  
20 Randomised Controlled Trials. *PLoS One*. 2016;11(7):e0158612.
- 21 461. Zhao J, Zhai YK, Zhu WJ, Sun DX. Effectiveness of Telemedicine for Controlling Asthma  
22 Symptoms: A Systematic Review and Meta-analysis. *Telemedicine journal and e-health : the official  
23 journal of the American Telemedicine Association*. 2014;21(6):484-92.
- 24 462. Hobson EV, Baird WO, Cooper CL, Mawson S, Shaw PJ, McDermott CJ. Using technology to  
25 improve access to specialist care in amyotrophic lateral sclerosis: A systematic review. *Amyotrophic  
26 lateral sclerosis & frontotemporal degeneration*. 2016;17(5-6):1-12.
- 27 463. Lam LT, Lam MK. eHealth Intervention for Problematic Internet Use (PIU). *Current psychiatry  
28 reports*. 2016;18(12):107.
- 29 464. Su D, McBride C, Zhou J, Kelley MS. Does nutritional counseling in telemedicine improve  
30 treatment outcomes for diabetes? A systematic review and meta-analysis of results from 92 studies.  
31 *Journal of telemedicine and telecare*. 2015;22(6):333-47.
- 32 465. Amatya B, Galea MP, Kesselring J, Khan F. Effectiveness of telerehabilitation interventions in  
33 persons with multiple sclerosis: A systematic review. *Multiple sclerosis and related disorders*.  
34 2015;4(4):358-69.
- 35 466. Budrionis A, Augestad KM, Patel HR, Bellika JG. An evaluation framework for defining the  
36 contributions of telestration in surgical telementoring. *Interactive journal of medical research*.  
37 2013;2(2):e14.
- 38 467. He T, Liu X, Li Y, Wu Q, Liu M, Yuan H. Remote home management for chronic kidney  
39 disease: A systematic review. *Journal of telemedicine and telecare*. 2016;23(1):3-13.
- 40 468. Kew KM, Cates CJ. Remote versus face-to-face check-ups for asthma. *Cochrane Database  
41 Syst Rev*. 2016;4:CD011715.
- 42 469. Klersy C, Boriani G, De Silvestri A, Mairesse GH, Braunschweig F, Scotti V, et al. Effect of  
43 telemonitoring of cardiac implantable electronic devices on healthcare utilization: a meta-analysis of  
44 randomized controlled trials in patients with heart failure. *Eur J Heart Fail*. 2016;18(2):195-204.
- 45 470. Pandor A, Gomersall T, Stevens JW, Wang J, Al-Mohammad A, Bakhai A, et al. Remote  
46 monitoring after recent hospital discharge in patients with heart failure: a systematic review and  
47 network meta-analysis. *Heart*. 2013;99(23):1717-26.
- 48 471. Vegesna A, Tran M, Angelaccio M, Arcona S. Remote Patient Monitoring via Non-Invasive  
49 Digital Technologies: A Systematic Review. *Telemed J E Health*. 2017;23(1):3-17.
- 50 472. Antoniou SA, Antoniou GA, Franzen J, Bollmann S, Koch OO, Pointner R, et al. A  
51 comprehensive review of telementoring applications in laparoscopic general surgery. *Surg Endosc*.  
52 2012;26(8):2111-6.
- 53  
54  
55  
56  
57  
58  
59  
60

- 1  
2  
3 473. Kew KM, Cates CJ. Home telemonitoring and remote feedback between clinic visits for  
4 asthma. *Cochrane Database of Systematic Reviews*. 2016(8).
- 5 474. Aguas Peris M, Del Hoyo J, Bebia P, Faubel R, Barrios A, Bastida G, et al. Telemedicine in  
6 Inflammatory Bowel Disease: Opportunities and Approaches. *Inflammatory bowel diseases*.  
7 2014;21(2):392-9.
- 8 475. Amadi-Obi A, Gilligan P, Owens N, O'Donnell C. Telemedicine in pre-hospital care: a review  
9 of telemedicine applications in the pre-hospital environment. *Int J Emerg Med*. 2014;7:29.
- 10 476. Car LT, Gentry, S., Hmmt van-Velthoven, M., Car, J. Telephone communication of HIV testing  
11 results for improving knowledge of HIV infection status. *Cochrane Database of Systematic Reviews*.  
12 2013.
- 13 477. Edirippulige S, Martin-Khan M, Beattie E, Smith AC, Gray LC. A systematic review of  
14 telemedicine services for residents in long term care facilities. *Journal of telemedicine and telecare*.  
15 2013;19(3).
- 16 478. Flodgren G, Rachas A, Farmer AJ, Inzitari M, Shepperd S. Interactive telemedicine: effects on  
17 professional practice and health care outcomes. *Cochrane Database Syst Rev*. 2015(9):CD002098.
- 18 479. Hilgart JS, Hayward JA, Coles B, Iredale R. Telegenetics: a systematic review of telemedicine  
19 in genetics services. *Genetics in medicine : official journal of the American College of Medical  
20 Genetics*. 2012;14(9):765-76.
- 21 480. Jhaveri D, Larkins S, Sabesan S. Telestroke, tele-oncology and teledialysis: a systematic  
22 review to analyse the outcomes of active therapies delivered with telemedicine support. *Journal of  
23 telemedicine and telecare*. 2015;21(4):181-8.
- 24 481. Marcolino MS, Maia JX, Alkmim MB, Boersma E, Ribeiro AL. Telemedicine application in the  
25 care of diabetes patients: systematic review and meta-analysis. *PLoS One*. 2013;8(11):e79246.
- 26 482. Rasekaba TM, Furler J, Blackberry I, Tacey M, Gray K, Lim K. Telemedicine interventions for  
27 gestational diabetes mellitus: A systematic review and meta-analysis. *Diabetes research and clinical  
28 practice*. 2015;110(1):1-9.
- 29 483. Tan IJ, Dobson LP, Bartnik S, Muir J, Turner AW. Real-time teleophthalmology versus face-to-  
30 face consultation: A systematic review. *Journal of telemedicine and telecare*. 2016;23(7):629-38.
- 31 484. Tan K, Lai NM. Telemedicine for the support of parents of high-risk newborn infants.  
32 *Cochrane Database Syst Rev*. 2012(6):CD006818.
- 33 485. Thomas SM, Jeyaraman MM, Hodge WG, Hutnik C, Costella J, Malvankar-Mehta MS. The  
34 effectiveness of teleglaucoma versus in-patient examination for glaucoma screening: a systematic  
35 review and meta-analysis. *PLoS One*. 2014;9(12):e113779.
- 36 486. Zandbelt LC, de Kanter FE, Ubbink DT. E-consulting in a medical specialist setting: Medicine  
37 of the future? *Patient education and counseling*. 2015;99(5):689-705.
- 38 487. Donoghue K, Patton R, Phillips T, Deluca P, Drummond C. The effectiveness of electronic  
39 screening and brief intervention for reducing levels of alcohol consumption: a systematic review and  
40 meta-analysis. *Journal of medical Internet research*. 2014;16(6):e142.
- 41 488. Tansil KA, Esser MB, Sandhu P, Reynolds JA, Elder RW, Williamson RS, et al. Alcohol  
42 Electronic Screening and Brief Intervention: A Community Guide Systematic Review. *American  
43 journal of preventive medicine*. 2016;51(5):801-11.
- 44 489. Bittner AK, Wykstra SL, Yoshinaga PD, Li T. Telerehabilitation for people with low vision.  
45 *Cochrane Database Syst Rev*. 2015;8:CD011019.
- 46 490. Cottrell MA, Galea OA, O'Leary SP, Hill AJ, Russell TG. Real-time telerehabilitation for the  
47 treatment of musculoskeletal conditions is effective and comparable to standard practice: a  
48 systematic review and meta-analysis. *Clin Rehabil*. 2017;31(5):625-38.
- 49 491. Khan F, Amatya, B., Kesselring, J. and Galea, M. Telerehabilitation for persons with multiple  
50 sclerosis. *Cochrane Database of Systematic Reviews*. 2015.
- 51 492. Laver KE, Schoene D, Crotty M, George S, Lannin NA, Sherrington C. Telerehabilitation  
52 services for stroke. *Cochrane Database Syst Rev*. 2013(12):CD010255.
- 53  
54  
55  
56  
57  
58  
59  
60

- 1  
2  
3 493. Shukla H, Nair SR, Thakker D. Role of telerehabilitation in patients following total knee  
4 arthroplasty: Evidence from a systematic literature review and meta-analysis. *Journal of*  
5 *telemedicine and telecare*. 2016;23(2):339-46.
- 6 494. Adedoyin AC, Sherr ME, Adedoyin OO, Royse DD, Jackson MS, Adu-Boahene AB. The  
7 Characteristics of Effective Cancer Education Media Interventions among African Americans: A  
8 Systematic Review. *Journal of evidence-informed social work*. 2015;13(4):1-14.
- 9 495. Alfred M, Ubogaya K, Chen X, Wint D, Worrall PS. Effectiveness of culturally focused  
10 interventions in increasing the satisfaction of hospitalized Asian patients: a systematic review. *JBIR*  
11 *Database System Rev Implement Rep*. 2016;14(8):219-56.
- 12 496. Antonio MC, Chung-Do JJ. Systematic review of interventions focusing on Indigenous  
13 adolescent mental health and substance use. *American Indian and Alaska native mental health*  
14 *research (Online)*. 2015;22(3):36-56.
- 15 497. Attridge M, Creamer, J., Ramsden, M., Cannings-John, R., Hawthorne, K. Culturally  
16 appropriate health education for people in ethnic minority groups with type 2 diabetes mellitus.  
17 *Cochrane Database of Systematic Reviews*. 2014.
- 18 498. Coast E, Jones E, Lattof SR, Portela A. Effectiveness of interventions to provide culturally  
19 appropriate maternity care in increasing uptake of skilled maternity care: a systematic review.  
20 *Health Policy Plan*. 2016;31(10):1479-91.
- 21 499. Escribà-Agüir V, Rodríguez-Gómez M, Ruiz-Pérez I. Effectiveness of patient-targeted  
22 interventions to promote cancer screening among ethnic minorities: A systematic review. *Cancer*  
23 *epidemiology*. 2016;44:22-39.
- 24 500. Leske S, Harris MG, Charlson FJ, Ferrari AJ, Baxter AJ, Logan JM, et al. Systematic review of  
25 interventions for Indigenous adults with mental and substance use disorders in Australia, Canada,  
26 New Zealand and the United States. *Aust N Z J Psychiatry*. 2016;50(11):1040-54.
- 27 501. Lood Q, Häggblom-Kronlöf G, Dahlin-Ivanoff S. Health promotion programme design and  
28 efficacy in relation to ageing persons with culturally and linguistically diverse backgrounds: a  
29 systematic literature review and meta-analysis. *BMC health services research*. 2015;15(1):560.
- 30 502. Washio Y, Cassey H. Systematic Review of Interventions for Racial/Ethnic-Minority Pregnant  
31 Smokers. *J Smok Cessat*. 2016;11(1):12-27.
- 32 503. Aslam RhW, Hendry M, Booth A, Carter B, Charles JM, Craine N, et al. Intervention Now to  
33 Eliminate Repeat Unintended Pregnancy in Teenagers (INTERUPT): a systematic review of  
34 intervention effectiveness and cost-effectiveness, and qualitative and realist synthesis of  
35 implementation factors and user engagement. *BMC Medicine*. 2017;15(1):155.
- 36 504. Health Quality O. Interventions to Improve Access to Primary Care for People Who Are  
37 Homeless: A Systematic Review. *Ontario health technology assessment series*. 2016;16(9):1-50.
- 38 505. Anderson LM, Adeney, K. L., Shinn, C., Safranek, S., Buckner-Brown, J. and Krause, L. K.  
39 Community coalition-driven interventions to reduce health disparities among racial and ethnic  
40 minority populations. *Cochrane Database of Systematic Reviews*. 2015.
- 41 506. Gottlieb LM, Garcia K, Wing H, Manchanda R. Clinical interventions addressing nonmedical  
42 health determinants in Medicaid managed care. *Am J Manag Care*. 2016;22(5):370-6.
- 43 507. Nierkens V, Hartman MA, Nicolaou M, Vissenberg C, Beune EJ, Hosper K, et al. Effectiveness  
44 of cultural adaptations of interventions aimed at smoking cessation, diet, and/or physical activity in  
45 ethnic minorities. a systematic review. *PLoS One*. 2013;8(10):e73373.
- 46 508. Antoine SL, Pieper D, Mathes T, Eikermann M. Improving the adherence of type 2 diabetes  
47 mellitus patients with pharmacy care: a systematic review of randomized controlled trials. *BMC*  
48 *Endocr Disord*. 2014;14:53.
- 49 509. Chaiyachati KH, Ogbuaji O, Price M, Suthar AB, Negussie EK, Bärnighausen T. Interventions  
50 to improve adherence to antiretroviral therapy: a rapid systematic review. *AIDS (London, England)*.  
51 2014;28 Suppl 2(SUPPL. 2):S187-204.
- 52 510. Farmer AJ, McSharry, J., Rowbotham, S., McGowan, L., Ricci-Cabello, I. and French, D. P.  
53 Effects of interventions promoting monitoring of medication use and brief messaging on medication  
54  
55  
56  
57  
58  
59  
60

- 1  
2  
3 adherence for people with Type 2 diabetes: a systematic review of randomized trials. *Diabetic*  
4 *medicine : a journal of the British Diabetic Association*. 2015.
- 5 511. Hu D, Juarez DT, Yeboah M, Castillo TP. Interventions to increase medication adherence in  
6 African-American and Latino populations: a literature review. *Hawai'i journal of medicine & public*  
7 *health : a journal of Asia Pacific Medicine & Public Health*. 2014;73(1):11-8.
- 8 512. Nieuwlaat R, Wilczynski N, Navarro T, Hobson N, Jeffery R, Keenanasseril A, et al.  
9 Interventions for enhancing medication adherence. *Cochrane Database Syst Rev*.  
10 2014(11):CD000011.
- 11 513. Njie GJ, Finnie RK, Acharya SD, Jacob V, Proia KK, Hopkins DP, et al. Reducing Medication  
12 Costs to Prevent Cardiovascular Disease: A Community Guide Systematic Review. *Prev Chronic Dis*.  
13 2015;12:E208.
- 14 514. Ruppap TM, Cooper PS, Mehr DR, Delgado JM, Dunbar-Jacob JM. Medication Adherence  
15 Interventions Improve Heart Failure Mortality and Readmission Rates: Systematic Review and Meta-  
16 Analysis of Controlled Trials. *Journal of the American Heart Association*. 2016;5(6).
- 17 515. Sapkota S, Brien JA, Greenfield J, Aslani P. A systematic review of interventions addressing  
18 adherence to anti-diabetic medications in patients with type 2 diabetes--impact on adherence. *PLoS*  
19 *One*. 2015;10(2):e0118296.
- 20 516. van Driel ML, Morledge MD, Ulep R, Shaffer JP, Davies P, Deichmann R. Interventions to  
21 improve adherence to lipid-lowering medication. *Cochrane Database Syst Rev*. 2016;12:Cd004371.
- 22 517. Viswanathan M, Golin CE, Jones CD, Ashok M, Blalock S, Wines RC, et al. Closing the quality  
23 gap: revisiting the state of the science (vol. 4: medication adherence interventions: comparative  
24 effectiveness). Evidence report/technology assessment. 2012(208.4):1-685.
- 25 518. Viswanathan M, Golin CE, Jones CD, Ashok M, Blalock SJ, Wines RC, et al. Interventions to  
26 improve adherence to self-administered medications for chronic diseases in the United States: a  
27 systematic review. *Ann Intern Med*. 2012;157(11):785-95.
- 28 519. Smith SM, Wallace E, O'Dowd T, Fortin M. Interventions for improving outcomes in patients  
29 with multimorbidity in primary care and community settings. *Cochrane Database Syst Rev*.  
30 2016;3:CD006560.
- 31 520. Leppin AL, Gionfriddo MR, Kessler M, Brito JP, Mair FS, Gallacher K, et al. Preventing 30-day  
32 hospital readmissions: a systematic review and meta-analysis of randomized trials. *JAMA Intern*  
33 *Med*. 2014;174(7):1095-107.
- 34 521. Chaudhuri D, Montgomery A, Gulenchyn K, Mitchell M, Joseph P. Effectiveness of Quality  
35 Improvement Interventions at Reducing Inappropriate Cardiac Imaging: A Systematic Review and  
36 Meta-Analysis. *Circulation Cardiovascular quality and outcomes*. 2016.
- 37 522. Jenkins HJ, Hancock, M. J., French, S. D., Maher, C. G., Engel, R. M. and Magnussen, J. S.  
38 Effectiveness of interventions designed to reduce the use of imaging for low-back pain: a systematic  
39 review. *CMAJ : Canadian Medical Association journal = journal de l'Association medicale canadienne*.  
40 2015.
- 41 523. Thomas RE, Vaska M, Naugler C, Turin TC. Interventions at the laboratory level to reduce  
42 laboratory test ordering by family physicians: Systematic review. *Clinical biochemistry*.  
43 2015;48(18):1358-65.
- 44 524. Kynoch K, Chang A, Coyer F, McArdle A. The effectiveness of interventions to meet family  
45 needs of critically ill patients in an adult intensive care unit: a systematic review update. *JB*  
46 *Database System Rev Implement Rep*. 2016;14(3):181-234.
- 47 525. Lopez LM, Steiner M, Grimes DA, Hilgenberg D, Schulz KF. Strategies for communicating  
48 contraceptive effectiveness. *Cochrane Database Syst Rev*. 2013(4):CD006964.
- 49 526. Marcelino CA, Díaz LJ, Da Cruz DM. The effectiveness of interventions in managing treatment  
50 adherence in adult heart transplant patients: a systematic review. *JB* *database of systematic reviews*  
51 *and implementation reports*. 2015;13(9):279-308.
- 52 527. Wu YP, Pai AL. Health care provider-delivered adherence promotion interventions: a meta-  
53 analysis. *Pediatrics*. 2014;133(6):e1698-707.
- 54  
55  
56  
57  
58  
59  
60

- 1  
2  
3 528. Greene JA, Bina R, Gum AM. Interventions to Increase Retention in Mental Health Services:  
4 A Systematic Review. *Psychiatric services (Washington, DC)*. 2016;67(5):485-95.  
5 529. Crocker-Buque T, Edelstein M, Mounier-Jack S. Interventions to reduce inequalities in  
6 vaccine uptake in children and adolescents aged <19 years: a systematic review. *J Epidemiol  
7 Community Health*. 2017;71(1):87-97.  
8 530. Sadaf A, Richards JL, Glanz J, Salmon DA, Omer SB. A systematic review of interventions for  
9 reducing parental vaccine refusal and vaccine hesitancy. *Vaccine*. 2013;31(40):4293-304.  
10 531. Thomas RE, Lorenzetti DL. Interventions to increase influenza vaccination rates of those 60  
11 years and older in the community. *Cochrane Database Syst Rev*. 2014(7):CD005188.  
12  
13  
14  
15  
16  
17  
18  
19  
20  
21  
22  
23  
24  
25  
26  
27  
28  
29  
30  
31  
32  
33  
34  
35  
36  
37  
38  
39  
40  
41  
42  
43  
44  
45  
46  
47  
48  
49  
50  
51  
52  
53  
54  
55  
56  
57  
58  
59  
60

For peer review only

## Supplementary file 3

**Table: Summary of health conditions represented in included reviews organised by EPOC Taxonomy of delivery arrangement interventions**

| EPOC Taxonomy category and health condition                                    | No. of Reviews |
|--------------------------------------------------------------------------------|----------------|
| <b>How and when care is delivered (n=47)</b>                                   |                |
| Acute respiratory infections                                                   | 2              |
| Aging (general)                                                                | 3              |
| Asthma                                                                         | 1              |
| Chronic conditions (multiple included in review or multi-morbidity)            | 4              |
| Chronic non-cancer pain                                                        | 1              |
| Critically ill                                                                 | 2              |
| Diabetes                                                                       | 1              |
| Human immunodeficiency virus (HIV)                                             | 1              |
| Maternal and child health                                                      | 7              |
| Mental health                                                                  | 1              |
| Musculoskeletal conditions                                                     | 1              |
| Oral health                                                                    | 1              |
| Surgery (including preoperative care & safety checklists)                      | 4              |
| Terminally ill                                                                 | 1              |
| No specific health condition targeted                                          | 17             |
| <b>Where care is provided and changes to the healthcare environment (n=55)</b> |                |
| Aging (general)                                                                | 2              |
| Asthma                                                                         | 1              |
| Cancer                                                                         | 2              |
| Chronic conditions (multiple included in review or multi-morbidity)            | 1              |
| Chronic kidney disease                                                         | 2              |
| Chronic obstructive pulmonary disease (COPD)                                   | 3              |
| Critically ill                                                                 | 1              |
| Cardiovascular disease (CVD)                                                   | 5              |
| Cystic fibrosis                                                                | 1              |



1  
2  
3  
4  
5  
6  
7  
8  
9  
10  
11  
12  
13  
14  
15  
16  
17  
18  
19  
20  
21  
22  
23  
24  
25  
26  
27  
28  
29  
30  
31  
32  
33  
34  
35  
36  
37  
38  
39  
40  
41  
42  
43  
44  
45  
46  
47  
48  
49  
50  
51  
52  
53  
54  
55  
56  
57  
58  
59  
60

|                                                                                                                              |    |
|------------------------------------------------------------------------------------------------------------------------------|----|
| Human immunodeficiency virus (HIV)                                                                                           | 1  |
| Lifestyle & Prevention (immunisations, and prevention programs targeting physical activity, drug and alcohol, diet, smoking) | 4  |
| Major trauma                                                                                                                 | 1  |
| Maternal and child health                                                                                                    | 10 |
| Mental health                                                                                                                | 5  |
| Musculoskeletal conditions                                                                                                   | 2  |
| Sexual and reproductive health                                                                                               | 1  |
| Surgery (including preoperative care & safety checklists)                                                                    | 1  |
| Terminally ill                                                                                                               | 2  |
| No specific health condition targeted                                                                                        | 10 |
| <b>Who provides care and how the healthcare workforce is managed (n=80)</b>                                                  |    |
| Acute respiratory infections                                                                                                 | 1  |
| Ageing                                                                                                                       | 4  |
| Asthma                                                                                                                       | 2  |
| Bowel conditions                                                                                                             | 1  |
| Cancer                                                                                                                       | 4  |
| Chronic conditions (multiple included in review or multi-morbidity)                                                          | 8  |
| Chronic kidney disease                                                                                                       | 1  |
| Chronic obstructive pulmonary disease (COPD)                                                                                 | 1  |
| Cardiovascular disease (CVD)                                                                                                 | 6  |
| Dementia                                                                                                                     | 1  |
| Diabetes                                                                                                                     | 2  |
| Human immunodeficiency virus (HIV)                                                                                           | 2  |
| Lifestyle & Prevention (immunisations, and prevention programs targeting physical activity, drug and alcohol, diet, smoking) | 4  |
| Major trauma                                                                                                                 | 2  |
| Maternal and child health                                                                                                    | 5  |
| Mental health                                                                                                                | 6  |
| Multiple sclerosis                                                                                                           | 1  |
| Musculoskeletal conditions                                                                                                   | 1  |
| Oral health                                                                                                                  | 3  |

|    |                                                                                                                              |    |
|----|------------------------------------------------------------------------------------------------------------------------------|----|
| 1  |                                                                                                                              |    |
| 2  |                                                                                                                              |    |
| 3  | Sexual and reproductive health                                                                                               | 2  |
| 4  |                                                                                                                              |    |
| 5  | Surgery (including preoperative care & safety checklists)                                                                    | 5  |
| 6  |                                                                                                                              |    |
| 7  | Terminally ill                                                                                                               | 1  |
| 8  |                                                                                                                              |    |
| 9  | No specific health condition targeted                                                                                        | 17 |
| 10 | <b>Coordination of care and management of care processes (n=122)</b>                                                         |    |
| 11 |                                                                                                                              |    |
| 12 | Acute respiratory infections                                                                                                 | 1  |
| 13 |                                                                                                                              |    |
| 14 | Ageing                                                                                                                       | 7  |
| 15 |                                                                                                                              |    |
| 16 | Asthma                                                                                                                       | 2  |
| 17 |                                                                                                                              |    |
| 18 | Cancer                                                                                                                       | 9  |
| 19 |                                                                                                                              |    |
| 20 | Chronic conditions (multiple included in review or multi-morbidity)                                                          | 7  |
| 21 |                                                                                                                              |    |
| 22 | Chronic kidney disease                                                                                                       | 2  |
| 23 |                                                                                                                              |    |
| 24 | Chronic viral hepatitis                                                                                                      | 1  |
| 25 |                                                                                                                              |    |
| 26 | Chronic obstructive pulmonary disease (COPD)                                                                                 | 2  |
| 27 |                                                                                                                              |    |
| 28 | Critically ill                                                                                                               | 2  |
| 29 |                                                                                                                              |    |
| 30 | Cardiovascular disease (CVD)                                                                                                 | 6  |
| 31 |                                                                                                                              |    |
| 32 | Dementia                                                                                                                     | 7  |
| 33 |                                                                                                                              |    |
| 34 | Diabetes                                                                                                                     | 8  |
| 35 |                                                                                                                              |    |
| 36 | Epilepsy                                                                                                                     | 2  |
| 37 |                                                                                                                              |    |
| 38 | Haemophilia                                                                                                                  | 1  |
| 39 |                                                                                                                              |    |
| 40 | Human immunodeficiency virus (HIV)                                                                                           | 4  |
| 41 |                                                                                                                              |    |
| 42 | Intellectual disability                                                                                                      | 1  |
| 43 |                                                                                                                              |    |
| 44 | Lifestyle & Prevention (immunisations, and prevention programs targeting physical activity, drug and alcohol, diet, smoking) | 1  |
| 45 |                                                                                                                              |    |
| 46 | Major trauma                                                                                                                 | 1  |
| 47 |                                                                                                                              |    |
| 48 | Maternal and child health                                                                                                    | 8  |
| 49 |                                                                                                                              |    |
| 50 | Mental health                                                                                                                | 9  |
| 51 |                                                                                                                              |    |
| 52 | Musculoskeletal conditions                                                                                                   | 4  |
| 53 |                                                                                                                              |    |
| 54 | Surgery (including preoperative care & safety checklists)                                                                    | 4  |
| 55 |                                                                                                                              |    |
| 56 | Terminally ill                                                                                                               | 6  |
| 57 |                                                                                                                              |    |
| 58 | No specific health condition targeted                                                                                        | 27 |
| 59 | <b>Information and communication technology systems (n=189)</b>                                                              |    |
| 60 |                                                                                                                              |    |
|    | Ageing                                                                                                                       | 1  |

|    |                                                                                                                              |    |
|----|------------------------------------------------------------------------------------------------------------------------------|----|
| 1  |                                                                                                                              |    |
| 2  |                                                                                                                              |    |
| 3  | Amyotrophic lateral sclerosis                                                                                                | 1  |
| 4  |                                                                                                                              |    |
| 5  | Asthma                                                                                                                       | 3  |
| 6  |                                                                                                                              |    |
| 7  | Bowel conditions                                                                                                             | 2  |
| 8  |                                                                                                                              |    |
| 9  | Cancer                                                                                                                       | 4  |
| 10 |                                                                                                                              |    |
| 11 | Chronic conditions (multiple included in review or multi-morbidity)                                                          | 16 |
| 12 |                                                                                                                              |    |
| 13 | Chronic kidney disease                                                                                                       | 1  |
| 14 |                                                                                                                              |    |
| 15 | Chronic obstructive pulmonary disease (COPD)                                                                                 | 2  |
| 16 |                                                                                                                              |    |
| 17 | Cardiovascular disease (CVD)                                                                                                 | 9  |
| 18 |                                                                                                                              |    |
| 19 | Dementia                                                                                                                     | 2  |
| 20 |                                                                                                                              |    |
| 21 | Diabetes                                                                                                                     | 15 |
| 22 |                                                                                                                              |    |
| 23 | Eye care                                                                                                                     | 3  |
| 24 |                                                                                                                              |    |
| 25 | Human immunodeficiency virus (HIV)                                                                                           | 6  |
| 26 |                                                                                                                              |    |
| 27 | Inflammatory bowel disease                                                                                                   | 1  |
| 28 |                                                                                                                              |    |
| 29 | Lifestyle & Prevention (immunisations, and prevention programs targeting physical activity, drug and alcohol, diet, smoking) | 39 |
| 30 |                                                                                                                              |    |
| 31 | Maternal and child health                                                                                                    | 5  |
| 32 |                                                                                                                              |    |
| 33 | Mental health                                                                                                                | 44 |
| 34 |                                                                                                                              |    |
| 35 | Multiple sclerosis                                                                                                           | 1  |
| 36 |                                                                                                                              |    |
| 37 | Musculoskeletal conditions                                                                                                   | 3  |
| 38 |                                                                                                                              |    |
| 39 | Sexual and reproductive health                                                                                               | 2  |
| 40 |                                                                                                                              |    |
| 41 | Surgery (including preoperative care & safety checklists)                                                                    | 4  |
| 42 |                                                                                                                              |    |
| 43 | Tuberculosis                                                                                                                 | 1  |
| 44 |                                                                                                                              |    |
| 45 | No specific health condition targeted                                                                                        | 24 |
| 46 |                                                                                                                              |    |
| 47 | <b>Goal-focused reviews (n=38)</b>                                                                                           |    |
| 48 |                                                                                                                              |    |
| 49 | Cancer                                                                                                                       | 2  |
| 50 |                                                                                                                              |    |
| 51 | Chronic conditions (multiple included in review or multi-morbidity)                                                          | 4  |
| 52 |                                                                                                                              |    |
| 53 | Critically ill                                                                                                               | 1  |
| 54 |                                                                                                                              |    |
| 55 | Cardiovascular disease (CVD)                                                                                                 | 5  |
| 56 |                                                                                                                              |    |
| 57 | Diabetes                                                                                                                     | 4  |
| 58 |                                                                                                                              |    |
| 59 | Human immunodeficiency virus (HIV)                                                                                           | 1  |
| 60 |                                                                                                                              |    |
|    | Lifestyle & Prevention (immunisations, and prevention programs targeting physical activity, drug and alcohol, diet, smoking) | 5  |

|    |                                       |            |
|----|---------------------------------------|------------|
| 1  |                                       |            |
| 2  |                                       |            |
| 3  | Maternal and child health             | 3          |
| 4  |                                       |            |
| 5  | Mental health                         | 2          |
| 6  |                                       |            |
| 7  | Musculoskeletal conditions            | 1          |
| 8  |                                       |            |
| 9  | Sexual and reproductive health        | 1          |
| 10 |                                       |            |
| 11 | No specific health condition targeted | 9          |
| 12 | <b>Total</b>                          | <b>531</b> |
| 13 |                                       |            |
| 14 |                                       |            |
| 15 |                                       |            |
| 16 |                                       |            |
| 17 |                                       |            |
| 18 |                                       |            |
| 19 |                                       |            |
| 20 |                                       |            |
| 21 |                                       |            |
| 22 |                                       |            |
| 23 |                                       |            |
| 24 |                                       |            |
| 25 |                                       |            |
| 26 |                                       |            |
| 27 |                                       |            |
| 28 |                                       |            |
| 29 |                                       |            |
| 30 |                                       |            |
| 31 |                                       |            |
| 32 |                                       |            |
| 33 |                                       |            |
| 34 |                                       |            |
| 35 |                                       |            |
| 36 |                                       |            |
| 37 |                                       |            |
| 38 |                                       |            |
| 39 |                                       |            |
| 40 |                                       |            |
| 41 |                                       |            |
| 42 |                                       |            |
| 43 |                                       |            |
| 44 |                                       |            |
| 45 |                                       |            |
| 46 |                                       |            |
| 47 |                                       |            |
| 48 |                                       |            |
| 49 |                                       |            |
| 50 |                                       |            |
| 51 |                                       |            |
| 52 |                                       |            |
| 53 |                                       |            |
| 54 |                                       |            |
| 55 |                                       |            |
| 56 |                                       |            |
| 57 |                                       |            |
| 58 |                                       |            |
| 59 |                                       |            |
| 60 |                                       |            |

For peer review only

## Preferred Reporting Items for Systematic reviews and Meta-Analyses extension for Scoping Reviews (PRISMA-ScR) Checklist

| SECTION                                               | ITEM | PRISMA-ScR CHECKLIST ITEM                                                                                                                                                                                                                                                                                  | REPORTED ON PAGE # |
|-------------------------------------------------------|------|------------------------------------------------------------------------------------------------------------------------------------------------------------------------------------------------------------------------------------------------------------------------------------------------------------|--------------------|
| <b>TITLE</b>                                          |      |                                                                                                                                                                                                                                                                                                            |                    |
| Title                                                 | 1    | Identify the report as a scoping review.                                                                                                                                                                                                                                                                   | pp.1,2,6           |
| <b>ABSTRACT</b>                                       |      |                                                                                                                                                                                                                                                                                                            |                    |
| Structured summary                                    | 2    | Provide a structured summary that includes (as applicable): background, objectives, eligibility criteria, sources of evidence, charting methods, results, and conclusions that relate to the review questions and objectives.                                                                              | p. 2               |
| <b>INTRODUCTION</b>                                   |      |                                                                                                                                                                                                                                                                                                            |                    |
| Rationale                                             | 3    | Describe the rationale for the review in the context of what is already known. Explain why the review questions/objectives lend themselves to a scoping review approach.                                                                                                                                   | pp.4-6             |
| Objectives                                            | 4    | Provide an explicit statement of the questions and objectives being addressed with reference to their key elements (e.g., population or participants, concepts, and context) or other relevant key elements used to conceptualize the review questions and/or objectives.                                  | p.6                |
| <b>METHODS</b>                                        |      |                                                                                                                                                                                                                                                                                                            |                    |
| Protocol and registration                             | 5    | Indicate whether a review protocol exists; state if and where it can be accessed (e.g., a Web address); and if available, provide registration information, including the registration number.                                                                                                             | p.7                |
| Eligibility criteria                                  | 6    | Specify characteristics of the sources of evidence used as eligibility criteria (e.g., years considered, language, and publication status), and provide a rationale.                                                                                                                                       | pp.7-8             |
| Information sources*                                  | 7    | Describe all information sources in the search (e.g., databases with dates of coverage and contact with authors to identify additional sources), as well as the date the most recent search was executed.                                                                                                  | pp.8               |
| Search                                                | 8    | Present the full electronic search strategy for at least 1 database, including any limits used, such that it could be repeated.                                                                                                                                                                            | pp.8-9             |
| Selection of sources of evidence†                     | 9    | State the process for selecting sources of evidence (i.e., screening and eligibility) included in the scoping review.                                                                                                                                                                                      | pp.8-9             |
| Data charting process‡                                | 10   | Describe the methods of charting data from the included sources of evidence (e.g., calibrated forms or forms that have been tested by the team before their use, and whether data charting was done independently or in duplicate) and any processes for obtaining and confirming data from investigators. | p.9                |
| Data items                                            | 11   | List and define all variables for which data were sought and any assumptions and simplifications made.                                                                                                                                                                                                     | pp.9-10            |
| Critical appraisal of individual sources of evidence§ | 12   | If done, provide a rationale for conducting a critical appraisal of included sources of evidence; describe the methods used and how this information was used in any data synthesis (if appropriate).                                                                                                      | n/a                |
| Synthesis of results                                  | 13   | Describe the methods of handling and summarizing the data that were charted.                                                                                                                                                                                                                               | p.10               |

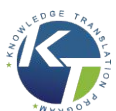

| SECTION                                       | ITEM | PRISMA-ScR CHECKLIST ITEM                                                                                                                                                                       | REPORTED ON PAGE # |
|-----------------------------------------------|------|-------------------------------------------------------------------------------------------------------------------------------------------------------------------------------------------------|--------------------|
| <b>RESULTS</b>                                |      |                                                                                                                                                                                                 |                    |
| Selection of sources of evidence              | 14   | Give numbers of sources of evidence screened, assessed for eligibility, and included in the review, with reasons for exclusions at each stage, ideally using a flow diagram.                    | p.10-11            |
| Characteristics of sources of evidence        | 15   | For each source of evidence, present characteristics for which data were charted and provide the citations.                                                                                     | pp.11-17           |
| Critical appraisal within sources of evidence | 16   | If done, present data on critical appraisal of included sources of evidence (see item 12).                                                                                                      | n/a                |
| Results of individual sources of evidence     | 17   | For each included source of evidence, present the relevant data that were charted that relate to the review questions and objectives.                                                           | pp.11-17           |
| Synthesis of results                          | 18   | Summarize and/or present the charting results as they relate to the review questions and objectives.                                                                                            | pp.11-17           |
| <b>DISCUSSION</b>                             |      |                                                                                                                                                                                                 |                    |
| Summary of evidence                           | 19   | Summarize the main results (including an overview of concepts, themes, and types of evidence available), link to the review questions and objectives, and consider the relevance to key groups. | pp.18-20           |
| Limitations                                   | 20   | Discuss the limitations of the scoping review process.                                                                                                                                          | pp.20-21           |
| Conclusions                                   | 21   | Provide a general interpretation of the results with respect to the review questions and objectives, as well as potential implications and/or next steps.                                       | p.19, 20-21        |
| <b>FUNDING</b>                                |      |                                                                                                                                                                                                 |                    |
| Funding                                       | 22   | Describe sources of funding for the included sources of evidence, as well as sources of funding for the scoping review. Describe the role of the funders of the scoping review.                 | p. 6, 22           |

JBI = Joanna Briggs Institute; PRISMA-ScR = Preferred Reporting Items for Systematic reviews and Meta-Analyses extension for Scoping Reviews.

\* Where *sources of evidence* (see second footnote) are compiled from, such as bibliographic databases, social media platforms, and Web sites.

† A more inclusive/heterogeneous term used to account for the different types of evidence or data sources (e.g., quantitative and/or qualitative research, expert opinion, and policy documents) that may be eligible in a scoping review as opposed to only studies. This is not to be confused with *information sources* (see first footnote).

‡ The frameworks by Arksey and O'Malley (6) and Levac and colleagues (7) and the JBI guidance (4, 5) refer to the process of data extraction in a scoping review as data charting.

§ The process of systematically examining research evidence to assess its validity, results, and relevance before using it to inform a decision. This term is used for items 12 and 19 instead of "risk of bias" (which is more applicable to systematic reviews of interventions) to include and acknowledge the various sources of evidence that may be used in a scoping review (e.g., quantitative and/or qualitative research, expert opinion, and policy document).

From: Tricco AC, Lillie E, Zarin W, O'Brien KK, Colquhoun H, Levac D, et al. PRISMA Extension for Scoping Reviews (PRISMA-ScR): Checklist and Explanation. *Ann Intern Med.* ;169:467–473. doi: 10.7326/M18-0850

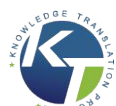



# BMJ Open

## Identifying alternative models of healthcare service delivery to inform health system improvement: a scoping review of systematic reviews

|                                 |                                                                                                                                                                                                                                                                                                                                                                                                                                                                                                                                                                                                                                                                                                                                                                                                                                                                                                                                                                                                                                                                                                                                      |
|---------------------------------|--------------------------------------------------------------------------------------------------------------------------------------------------------------------------------------------------------------------------------------------------------------------------------------------------------------------------------------------------------------------------------------------------------------------------------------------------------------------------------------------------------------------------------------------------------------------------------------------------------------------------------------------------------------------------------------------------------------------------------------------------------------------------------------------------------------------------------------------------------------------------------------------------------------------------------------------------------------------------------------------------------------------------------------------------------------------------------------------------------------------------------------|
| Journal:                        | <i>BMJ Open</i>                                                                                                                                                                                                                                                                                                                                                                                                                                                                                                                                                                                                                                                                                                                                                                                                                                                                                                                                                                                                                                                                                                                      |
| Manuscript ID                   | bmjopen-2019-036112.R1                                                                                                                                                                                                                                                                                                                                                                                                                                                                                                                                                                                                                                                                                                                                                                                                                                                                                                                                                                                                                                                                                                               |
| Article Type:                   | Original research                                                                                                                                                                                                                                                                                                                                                                                                                                                                                                                                                                                                                                                                                                                                                                                                                                                                                                                                                                                                                                                                                                                    |
| Date Submitted by the Author:   | 08-Feb-2020                                                                                                                                                                                                                                                                                                                                                                                                                                                                                                                                                                                                                                                                                                                                                                                                                                                                                                                                                                                                                                                                                                                          |
| Complete List of Authors:       | Jessup, Rebecca; Cabrini Institute, Monash Department of Clinical Epidemiology; Monash University, Department of Epidemiology and Preventive Medicine, School of Public Health and Preventive Medicine<br>Putrik, Polina; Cabrini Institute, Monash Department of Clinical Epidemiology; Monash University, Dept of Epidemiology and Preventive Medicine<br>Buchbinder, Rachelle; Cabrini Institute, Monash Department of Clinical Epidemiology; Monash University, Dept of Epidemiology and Preventive Medicine<br>Nezon, Janet; Cabrini Institute, Monash Department of Clinical Epidemiology<br>Rischin, Kobi; Cabrini Institute, Monash Department of Clinical Epidemiology; Monash University, Dept of Epidemiology and Preventive Medicine<br>Cyril, Sheila; Cabrini Institute, Monash Department of Clinical Epidemiology; Monash University, Dept of Epidemiology and Preventive Medicine<br>Shepperd, S; University of Oxford, Nuffield Department of Population Health<br>O'Connor, Denise; Cabrini Institute, Monash Department of Clinical Epidemiology; Monash University, Dept of Epidemiology and Preventive Medicine |
| <b>Primary Subject Heading</b>: | Health services research                                                                                                                                                                                                                                                                                                                                                                                                                                                                                                                                                                                                                                                                                                                                                                                                                                                                                                                                                                                                                                                                                                             |
| Secondary Subject Heading:      | Health policy, Health economics                                                                                                                                                                                                                                                                                                                                                                                                                                                                                                                                                                                                                                                                                                                                                                                                                                                                                                                                                                                                                                                                                                      |
| Keywords:                       | Health economics < HEALTH SERVICES ADMINISTRATION & MANAGEMENT, Health policy < HEALTH SERVICES ADMINISTRATION & MANAGEMENT, Organisation of health services < HEALTH SERVICES ADMINISTRATION & MANAGEMENT                                                                                                                                                                                                                                                                                                                                                                                                                                                                                                                                                                                                                                                                                                                                                                                                                                                                                                                           |
|                                 |                                                                                                                                                                                                                                                                                                                                                                                                                                                                                                                                                                                                                                                                                                                                                                                                                                                                                                                                                                                                                                                                                                                                      |

SCHOLARONE™  
Manuscripts

1  
2  
3  
4  
5  
6  
7  
8  
9  
10  
11  
12  
13  
14  
15  
16  
17  
18  
19  
20  
21  
22  
23  
24  
25  
26  
27  
28  
29  
30  
31  
32  
33  
34  
35  
36  
37  
38  
39  
40  
41  
42  
43  
44  
45  
46  
47  
48  
49  
50  
51  
52  
53  
54  
55  
56  
57  
58  
59  
60

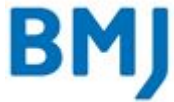

I, the Submitting Author has the right to grant and does grant on behalf of all authors of the Work (as defined in the below author licence), an exclusive licence and/or a non-exclusive licence for contributions from authors who are: i) UK Crown employees; ii) where BMJ has agreed a CC-BY licence shall apply, and/or iii) in accordance with the terms applicable for US Federal Government officers or employees acting as part of their official duties; on a worldwide, perpetual, irrevocable, royalty-free basis to BMJ Publishing Group Ltd ("BMJ") its licensees and where the relevant Journal is co-owned by BMJ to the co-owners of the Journal, to publish the Work in this journal and any other BMJ products and to exploit all rights, as set out in our [licence](#).

The Submitting Author accepts and understands that any supply made under these terms is made by BMJ to the Submitting Author unless you are acting as an employee on behalf of your employer or a postgraduate student of an affiliated institution which is paying any applicable article publishing charge ("APC") for Open Access articles. Where the Submitting Author wishes to make the Work available on an Open Access basis (and intends to pay the relevant APC), the terms of reuse of such Open Access shall be governed by a Creative Commons licence – details of these licences and which [Creative Commons](#) licence will apply to this Work are set out in our licence referred to above.

Other than as permitted in any relevant BMJ Author's Self Archiving Policies, I confirm this Work has not been accepted for publication elsewhere, is not being considered for publication elsewhere and does not duplicate material already published. I confirm all authors consent to publication of this Work and authorise the granting of this licence.

1  
2  
3 **Identifying alternative models of healthcare service delivery to inform health system**  
4 **improvement: a scoping review of systematic reviews**  
5  
6  
7  
8  
9

10 **Rebecca L Jessup<sup>1,2,3</sup>, Polina Putrik<sup>1,2</sup>, Rachelle Buchbinder<sup>1,2</sup>, Janet Nezon<sup>1</sup>, Kobi Rischin<sup>1,2</sup>,**  
11 **Sheila Cyril<sup>1,2</sup>, Sasha Shepperd<sup>4</sup>, Denise A O'Connor<sup>\*1,2</sup>**  
12  
13  
14  
15  
16

17  
18 1 Monash Department of Clinical Epidemiology, Cabrini Institute, Malvern, 3144  
19

20 2 Department of Epidemiology and Preventive Medicine, School of Public Health and  
21 Preventive Medicine, Monash University, Melbourne, 3004  
22  
23

24 3 Department of Allied Health, Northern Health, Melbourne 3076  
25  
26

27 4 Nuffield Department of Population Health, University of Oxford, Oxford, UK, OX3 7LF  
28  
29  
30  
31  
32  
33  
34

35 **\* Corresponding author:**  
36

37 **4 Drysdale Street, Malvern VIC 3144, Australia**  
38

39 **Ph +61 9508 3428, email: Denise.OConnor@monash.edu**  
40  
41  
42  
43  
44  
45  
46  
47

48 **Key words:** healthcare delivery, models of care, scoping review, health system improvement  
49  
50  
51  
52

53 **Main body word count: 4,584**  
54  
55  
56  
57  
58  
59  
60

## Abstract

**Objective:** To describe available evidence from systematic reviews of alternative healthcare delivery arrangements relevant to high-income countries to inform decisions about healthcare system improvement.

**Design:** Scoping review of systematic reviews.

**Data sources:** Systematic reviews of interventions indexed in PDQ-Evidence.

**Eligibility Criteria:** All English language systematic reviews evaluating the effects of alternative delivery arrangements relevant to high-income countries, published between 1<sup>st</sup> January 2012 and 20<sup>th</sup> September 2017. Eligible reviews had to summarise evidence on at least one of the following outcomes: patient outcomes, quality of care, access and/or utilisation of healthcare services, resource use, impacts on equity and/or social outcomes, healthcare provider outcomes or adverse effects.

**Data extraction and synthesis:** Journal, publication year, number and design of primary studies, populations/ health conditions represented and types of outcomes were extracted.

**Results:** Of 829 retrieved records, 531 reviews fulfilled our inclusion criteria. Almost all (93%) reviews reported on patient outcomes while only about one third included resource use as an outcome of interest. Just over a third (n=189, 36%) of reviews focused on alternative information and communications technology interventions (including 162 reviews on telehealth). About one quarter (n=122, 23%) of reviews focused on alternative care co-ordination interventions. 15% (n=80) of reviews examined interventions involving changes to who provides care and how the healthcare workforce is managed. Few reviews investigated the effects of interventions involving changes to how and when care is delivered (n=47, 9%) or interventions addressing a goal-focused question (n=38, 7%).

**Conclusions:** A substantial body of evidence about the effects of a wide range of delivery arrangements is available to inform health system improvements. The lack of economic evaluations in the majority of systematic reviews of delivery arrangements means that the value of many of these models is unknown. This scoping review identifies evidence gaps that would be usefully addressed by future research.

## Article summary

### Strengths and limitations of this study

- We have followed published methodological guidance for conducting this scoping review
- The search was limited to a five-year period (2012-2017) to retrieve up-to-date reviews of alternative delivery arrangements relevant to high-income countries
- As this scoping review sought to map the state of the literature in this area, we did not appraise the quality of the included reviews and did not attempt to synthesise the effects of healthcare delivery arrangements in the included systematic reviews
- Systematic reviews that were awaiting classification in 'Pretty Darn Quick (PDQ)'-Evidence at the moment of search were not captured in the search

### Background

The last century has seen a continuous growth in investment in the health systems of high-income countries [1]. This has contributed to significant improvements in population health and a reduction in demand for medical care of communicable diseases, but a proportional increase in demand for the management of chronic and complex conditions [2, 3]. In addition, advances in medical technology, and more population based screening and management of disease risk factors have increased the scope of healthcare services [4-8]. Taken together, this has fuelled the inflation of healthcare costs [1]. The cost of delivering healthcare in most high income countries is now considered unsustainable and is expected to be unaffordable by the middle of the 21st century without major reforms [1].

A challenge for healthcare systems and funders is how to deliver high-value, effective care while slowing (and where possible reversing) the rate of increase in costs. This requires an understanding of the effectiveness and economic impact of current service models, and a



1  
2  
3 determination of whether there are alternative models of healthcare delivery that might  
4  
5 lead to improved efficiencies without compromising the quality and outcomes of care.  
6  
7

8  
9 The value of a given model of healthcare service delivery is based upon its ratio of benefits  
10  
11 and harms relative to its cost [9, 10]. In an ideal health system, healthcare resources should  
12  
13 be allocated across interventions and population groups to generate the highest possible  
14  
15 overall level of population health at the lowest cost. In practice, this means reallocating  
16  
17 resources away from resource intensive interventions that have little or no benefit and  
18  
19 redistributing to cost-effective and/or resource-wise interventions to enhance the allocative  
20  
21 efficiency of health systems. Reconfiguring the way healthcare is delivered may be one  
22  
23 method for improving the allocation of finite healthcare resources.  
24  
25  
26  
27

28  
29 There are a number of different ways that healthcare delivery may be modified, including  
30  
31 changing the location that healthcare is delivered (e.g., hospital to home), providing care in  
32  
33 a group setting rather than to individuals, substituting care provided by one health  
34  
35 professional to care provided by an alternative appropriately trained healthcare  
36  
37 professional or lay person, or using technology to assist with the provision of care (e.g.  
38  
39 telehealth). Provision of services in alternative ways such as this may lead to similar, and in  
40  
41 some cases better, outcomes for patients. However, they may also modify the costs (or shift  
42  
43 them to other stakeholders) or the demand for service due to more liberal access.  
44  
45 Therefore, in addition to effectiveness, robust economic evaluations of alternative models  
46  
47 of care delivery are required to inform decisions about the allocation of funding based on  
48  
49 their relative value. High cost models that deliver benefits to patients may still be good  
50  
51 value, while low-cost models of care that provide little or no benefit may have limited value  
52  
53  
54  
55  
56  
57  
58  
59 [9].  
60

1  
2  
3 Numerous systematic reviews summarising the effects of alternative models of care delivery  
4 have been published to date. Almost all have focused on changes in the delivery of  
5 healthcare for a single condition [11], a change to the scope of practice of a single type of  
6 health professional role in a specific setting [12], or a single delivery arrangement type such  
7 as chronic disease programs [13], multidisciplinary care, or integrated care interventions  
8 [14]. A Cochrane overview of alternative delivery arrangements relevant to low-income  
9 countries was recently published [15]. Given the differences between low-income and high-  
10 income countries in terms of service demands and access to specialist care and  
11 technologies, the findings of this overview may have less relevance or applicability to service  
12 delivery in high-income countries. No similar study of alternative delivery arrangements  
13 relevant to high-income countries has been published to date.

14  
15  
16  
17  
18  
19  
20  
21  
22  
23  
24  
25  
26  
27  
28  
29  
30  
31 The aim of this scoping review was to describe the extent, range and nature of available  
32 systematic reviews of alternative delivery arrangements for health systems relevant to high-  
33 income countries published in the last five years. A timeframe of five years was chosen to  
34 ensure that the review contained evidence and data about effects that are most up-to-date,  
35 reliable and potentially ready to implement. A secondary aim was to identify gaps in the  
36 availability of up-to-date systematic reviews of alternative delivery arrangements needed to  
37 inform health system sustainability initiatives and future research directions.

38  
39  
40  
41  
42  
43  
44  
45  
46  
47  
48  
49 This review forms part of a five-year Partnership Centre for Health Systems Sustainability,  
50 funded by the Australian National Health and Medical Research Council (NHMRC) and other  
51 partners. The Partnership Centre is a collaborative of investigators, system leaders, expert  
52 advisors, system implementation partners, and funding partners from around Australia and  
53  
54  
55  
56  
57  
58  
59  
60

1  
2  
3 aims to investigate and create interventions to improve health system performance  
4  
5 sustainability (<https://www.healthsystemsustainability.com.au/>).  
6  
7

## 8 9 **METHODS**

### 10 11 12 **Protocol**

13  
14  
15  
16 The protocol for this scoping review has been published [16] (Supplementary file 1). It was  
17  
18 informed by the methodological framework that emphasises transparency of the scoping  
19  
20 review process to increase the reliability of the findings[17,18]. Scoping reviews such as this  
21  
22 are particularly useful for systematically mapping research findings across a body of  
23  
24 research evidence that is heterogeneous and/or complex in nature. We reported our  
25  
26 scoping review according to the PRISMA for Scoping Reviews (PRISMA-ScR) statement [17].  
27  
28  
29

### 30 31 32 **Criteria for considering reviews for inclusion**

33  
34  
35 All English language systematic reviews examining the effects of alternative delivery  
36  
37 arrangements for health systems relevant to high-income countries published in the last five  
38  
39 years were included. Alternative delivery arrangements include changes to the method of  
40  
41 how and when care is delivered, where care is provided and changes to the healthcare  
42  
43 environment, who provides care and how the workforce is managed, co-ordination of care  
44  
45 and management of care processes, and information and communication technology (ICT)  
46  
47 systems [18].  
48  
49

50  
51  
52  
53 For inclusion, systematic reviews needed to assess the effects of alternative delivery  
54  
55 arrangements of relevance to high-income countries (as classified by the World Bank for the  
56  
57 2017 fiscal year) [19], have a methods section with explicit inclusion criteria, and report at  
58  
59  
60

1  
2  
3 least one of the following outcomes: patient outcomes (health status, health behaviours),  
4  
5 quality of care, access and/ or utilisation of healthcare services, resource use, impacts on  
6  
7 equity and/ or social outcomes, healthcare provider outcomes, or adverse effects. As the  
8  
9 primary aim of the review was to describe the extent, range and nature of available  
10  
11 evidence syntheses published in this area, we included systematic reviews containing trials  
12  
13 with or without economic studies as well as systematic reviews containing trials with or  
14  
15 without other study designs (e.g. interrupted time series, controlled before-after studies  
16  
17 etc). This is because trials addressing questions about the effects of health system  
18  
19 interventions may be difficult to implement and are often not available. Systematic reviews  
20  
21 that included interventions in any setting were included and encompassed hospital  
22  
23 (inpatient or outpatient care, acute or subacute), primary care, long-term care facilities/  
24  
25 residential care and the community.  
26  
27  
28  
29  
30  
31  
32

### 33 **Search methods for identifying reviews**

34  
35  
36  
37 'Pretty Darn Quick' (PDQ)-Evidence was searched to identify systematic reviews of  
38  
39 interventions to improve the organisation of healthcare services published between 1<sup>st</sup>  
40  
41 January 2012 and 20<sup>th</sup> September 2017. PDQ-Evidence is a database of evidence for  
42  
43 decisions about health systems derived from the Epistomonikos database of systematic  
44  
45 reviews. PDQ-Evidence includes the following databases: Cochrane Database of Systematic  
46  
47 Reviews (CDSR), Database of Abstracts of Reviews of Effectiveness (DARE), MEDLINE via  
48  
49 PubMed, EMBASE, CINAHL, PsycINFO, Latin American and Caribbean Health Sciences  
50  
51 Literature (LILACS), JBI Database of Systematic Reviews and Implementation Reports,  
52  
53 Evidence for Policy and Practice Information and Co-ordinating Centre (EPPI-Centre)  
54  
55 Evidence Library, and the Campbell Collaboration online library. The 'intervention'  
56  
57  
58  
59  
60

1  
2  
3 publication filter was used to include only systematic reviews that included studies of  
4  
5 interventions, and excluded diagnostic (impact and accuracy), prognostic, prediction  
6  
7 (diagnostic and prognostic) and qualitative systematic reviews.  
8  
9

### 10 11 **Selection of reviews** 12

13  
14  
15 Two review authors (RJ, SC) independently screened the titles and abstracts and coded as  
16  
17 'retrieve' (potentially eligible or unclear) or 'do not retrieve' (ineligible). At least two of four  
18  
19 review authors (RJ, PP, JN, KR) independently screened the full text reports for inclusion.  
20  
21 The reason for exclusion of ineligible systematic reviews was recorded. Disagreements were  
22  
23 resolved through discussion or involvement of a third review author (DOC or RB). A PRISMA  
24  
25 flow diagram was developed to summarise the search and selection process (Figure 1).  
26  
27  
28  
29

### 30 31 **Data extraction and management** 32

33  
34 Data was extracted on systematic review characteristics (year of publication, authors,  
35  
36 number and design of included studies, journal), population, health condition/s (where  
37  
38 reported), types of outcomes of interest (namely, patient outcomes, quality of care, access  
39  
40 and/ or utilisation of healthcare services, resource use, impacts on equity, social outcomes,  
41  
42 healthcare provider outcomes, adverse effects), and whether reviews included economic  
43  
44 analyses. Microsoft Excel software was used to manage the data. A data extraction form  
45  
46 was piloted and refined [20]. Review authors involved in data extraction (RJ, PP, JN, KR)  
47  
48 independently extracted data from the first ten included reviews and discussed their  
49  
50 findings to ensure consistency. Consistency of extraction was also performed independently  
51  
52 by two review authors (RJ, PP) for a third of included reviews to ensure data collection was  
53  
54 robust and to determine level of agreement. As the mean agreement across review authors  
55  
56  
57  
58  
59  
60

1  
2  
3 was 93% a single review author independently extracted the data from the remaining  
4  
5 included reviews.  
6  
7

### 9 **Collating and summarising results**

10  
11  
12 Delivery arrangements were categorised using the Cochrane Effective Practice and  
13  
14 Organisation of Care (EPOC) taxonomy of health system interventions[18] which  
15  
16 characterizes interventions according to conceptual, functional and/or practical similarities.  
17  
18 The delivery arrangement domain of the taxonomy classifies interventions into five  
19  
20 categories (and related subcategories) based on changes to the following:  
21  
22  
23

- 24 1. how and when care is delivered;
  - 25 2. where care is provided and changes to the healthcare environment;
  - 26 3. who provides care and how the healthcare workforce is managed;
  - 27 4. co-ordination of care and management of care processes; and
  - 28 5. ICT systems.
- 29  
30  
31  
32  
33  
34  
35  
36  
37  
38

39 To this taxonomy we added a category of goal-focused reviews. This was used to categorise  
40  
41 systematic reviews that summarised a range of alternative care delivery models across two  
42  
43 or more EPOC categories.  
44  
45

46  
47 As this was a scoping review, rather than an overview of systematic reviews designed to  
48  
49 synthesise the results of the included systematic reviews, a critical appraisal of the quality of  
50  
51 the included systematic reviews was not conducted.  
52  
53

54  
55 We summarised our findings quantitatively by presenting a numerical count of reviews in  
56  
57 each delivery arrangement category, visually using a bubble chart to display the quantity  
58  
59  
60



1  
2  
3 and range of reviews across categories, and also using a narrative synthesis. We reported  
4  
5 the number of Cochrane reviews in each category given that Cochrane reviews are  
6  
7 considered to have higher methodological quality compared to non-Cochrane reviews.[21,  
8  
9 22] We also reported the total number of primary studies (of any design) included in the  
10  
11 systematic reviews in each category and separately a number of randomised trials in which  
12  
13 the model of care was rigorously tested.  
14  
15  
16  
17

## 18 19 **RESULTS**

### 20 21 22 **Results of search**

23  
24  
25 The search yielded 829 citations. After title and abstract screening, 623 full text reports  
26  
27 were retrieved and assessed for eligibility. 92 full text reports were excluded and 531  
28  
29 systematic reviews were included (Figure 1). The citations of included reviews are in  
30  
31 Supplementary file 2.  
32  
33  
34  
35

### 36 37 **Description of included reviews**

38  
39  
40 Of the 531 systematic reviews, 125 (24%) were Cochrane reviews. A total of 12,230  
41  
42 individual studies were included across all systematic reviews, and these included 6,911  
43  
44 randomised controlled trials. 106 (20%) reviews focused on common chronic diseases (e.g.,  
45  
46 diabetes, chronic obstructive pulmonary disease, heart failure, chronic kidney failure,  
47  
48 asthma, musculoskeletal conditions) and 53 (10%) reviews focused on patients undergoing  
49  
50 lifestyle and prevention interventions. Over 90% of reviews examined the effects of  
51  
52 alternative delivery arrangements on patient outcomes (e.g. mortality, morbidity).  
53  
54 Approximately one third of reviews reported access and/ or utilisation of healthcare services  
55  
56 as outcomes. One third of reviews included economic evaluation studies. Only 12% of  
57  
58  
59  
60

1  
2  
3 reviews included quality of care measures as outcomes and only 6% and 3% of reviews  
4  
5 reported impacts of alternative delivery arrangements on equity and social outcomes,  
6  
7 respectively (Table 1).  
8  
9

10  
11 Figure 2 provides an overview of the 531 systematic reviews, organised according to the  
12  
13 Cochrane EPOC taxonomy. The greatest number of reviews focused on changes to ICT  
14  
15 systems used by healthcare organisations to manage the delivery of healthcare (n=189). The  
16  
17 majority of these focused on telehealth interventions (n=162). The fewest number of  
18  
19 reviews (excluding goal-focused) were concerned with changes to how and when healthcare  
20  
21 is delivered (n=47). The reviews relating to each category are described in more detail  
22  
23 below.  
24  
25  
26  
27  
28  
29

### 30 **1. How and when care is delivered**

31  
32  
33 Of the 47 systematic reviews included in this category, 14 (30%) were Cochrane reviews. A  
34  
35 total of 1085 primary studies were included in systematic reviews for this category,  
36  
37 including 394 (36%) randomised controlled trials.  
38  
39  
40

41  
42 Systematic reviews in this category included a number of quality and safety initiatives (e.g.,  
43  
44 use of safety checklists to reduce wrong site surgery), alternative methods for queuing  
45  
46 patients (e.g., patient-initiated clinics in chronic disease, strategies to reduce waiting times  
47  
48 for elective surgery procedures). Many of the reviews in this category were not focused on a  
49  
50 specific health condition (n=17, 36%), but where they were, the greatest number of reviews  
51  
52 related to maternal and child health (n=7, 15%) (Supplementary file 3). Few systematic  
53  
54 reviews examined group versus individual care (n=5, 11%) (e.g., group antenatal care for  
55  
56 pregnant women), or triage strategies (n=2, 4%) (e.g., improving patient flow the emergency  
57  
58  
59  
60

1  
2  
3 department). There was one Cochrane review focused on walk-in clinics versus physician  
4 offices and emergency rooms for urgent care and chronic disease management that did not  
5  
6 find any eligible trials.  
7  
8  
9

## 10 11 **2. Where care is provided and changes to the healthcare environment**

12  
13  
14  
15 There were 55 systematic reviews included in this category. Of 1002 primary studies in this  
16  
17 category, 323 (32%) were randomised controlled trials.  
18  
19

20  
21 Most reviews investigated changes to the site of healthcare delivery (n=51, 93%) with the  
22  
23 majority of these focused on shifting care away from the hospital setting to the home  
24  
25 (n=32). The remaining reviews focused on shifting care from the inpatient to the outpatient  
26  
27 or day stay setting (e.g. outpatient versus inpatient management for acute pulmonary  
28  
29 embolism) (n=6); from the hospital to primary or community care organisations (e.g.,  
30  
31 primary care asthma clinics) (n=4); from hospital to a therapeutic community (e.g., for  
32  
33 mental health care) (n=2); provision of care in at site (e.g., pre-hospital versus in-hospital  
34  
35 thrombolysis) (n=4), or provision of care in schools (e.g., for mental health and health  
36  
37 equity) (n=3). A small number of reviews in this category looked at changes to other aspects  
38  
39 of the healthcare environment, including the physical or sensory environment (n=1)  
40  
41 (rooming in services for pregnant mothers), outreach services (n=1) (mobile screening clinics  
42  
43 for maternal and child health), and transportation services (n=1) (helicopter emergency  
44  
45 medical services for adults with major trauma) and centralization of services (n=1) (for  
46  
47 gynaecological cancer).  
48  
49  
50  
51  
52  
53  
54  
55

56 Ten reviews (18%) in this category focused on maternal and child health, five (9%) focused  
57  
58 on mental health and five (9%) focused on cardiovascular disease, while the remainder  
59  
60

1  
2  
3 focused on a range of chronic and complex conditions and lifestyle and preventive care  
4  
5 (Supplementary file 3). One Cochrane review on home-based phototherapy for the  
6  
7 management of non-haemolytic jaundice in infants found no eligible trials.  
8  
9

### 10 11 **3. Who provides care and how the healthcare workforce is managed** 12

13  
14  
15 There were 80 systematic reviews included in this category, 18 (23%) were Cochrane  
16  
17 reviews. Of 1408 primary studies in this category, 802 (57%) were randomised controlled  
18  
19 trials.  
20  
21

22  
23 Most reviews in this category explored substituting medical for appropriately trained  
24  
25 nursing care (n=27, 34%), or extending the scope of pharmacists' practice beyond  
26  
27 dispensing services to provision of assessments, diagnosis and education (n=23, 29%). A  
28  
29 small number of reviews also looked at self-management versus usual care, with a large  
30  
31 focus on management of chronic conditions.  
32  
33

34  
35  
36 Many of the reviews did not focus on a specific health condition (n=17, 21%) but were  
37  
38 focused on changes to workforce roles regardless of condition (Supplementary file 3). For  
39  
40 those that did focus on a specific health condition, the largest number was concerned with  
41  
42 role expansion to care for patients with different types of chronic disease or multimorbidity  
43  
44 (n=8, 10%). One Cochrane review with on advanced trauma life support training and role  
45  
46 expansion of hospital health professionals and ambulance crews on patient mortality and  
47  
48 morbidity did not locate any studies that satisfied the eligibility criteria.  
49  
50  
51

### 52 53 **4. Co-ordination of care and management of care processes** 54 55 56 57 58 59 60

1  
2  
3 There were 122 systematic reviews included in this category, 28 (23%) were Cochrane  
4  
5 reviews. Of 2554 primary studies in this category, 1619 (63%) were randomised controlled  
6  
7 trials.  
8  
9

10  
11 The delivery arrangements in this category included transition care arrangements (e.g.,  
12  
13 hospital to home, from primary to specialist care, or from paediatric to adult services),  
14  
15 integrated care models for a range of chronic and complex diseases, early supported  
16  
17 discharge to home (e.g., for mild to moderate stroke or COPD) and multidisciplinary or  
18  
19 interdisciplinary care teams for specific diseases or conditions (e.g., geriatric consultation  
20  
21 teams in acute hospitals, collaborative care for depression and anxiety). Other delivery  
22  
23 arrangements were care pathways (e.g., critical care pathways for head and neck cancer  
24  
25 surgery), disease management for a range of conditions (e.g., prenatal, dementia and  
26  
27 mental illness, intellectual disability), and case management (e.g., intensive case  
28  
29 management for heart failure, severe mental health, adults with medical illness and  
30  
31 complex care needs) (Table 2).  
32  
33  
34  
35  
36  
37  
38

39 Several reviews in this category did not focus on a particular health condition (n=17, 14%)  
40  
41 however a few focused on co-ordination of care in cancer (n=9, 7%), diabetes (n=8, 7%),  
42  
43 maternal and child health (n=8, 7%), cardiovascular disease (n=6, 5%), mental health (n=6,  
44  
45 5%) and for the terminally ill (n=6, 5%) (Supplementary file 3). We identified two reviews  
46  
47 that reported they did not locate any studies that met eligibility criteria. One focused on  
48  
49 service responses for people with intellectual disabilities and epilepsy, the second focused  
50  
51 on specialist teams for neonatal transport to neonatal intensive care units.  
52  
53  
54  
55  
56

## 57 **5. Information and communication technology systems**

58  
59  
60

1  
2  
3 There were 189 systematic reviews included in this category, 34 (18%) were Cochrane  
4 reviews. Of 4926 primary studies in this category, 2904 (59%) were randomised controlled  
5 trials.  
6  
7  
8  
9

10  
11 The largest number of reviews focused on telehealth (n=162, 86%) and included a range of  
12 interventions such as telephone counselling, telemonitoring, mobile texting or applications,  
13 and Internet-based programs (e.g., cognitive behavioural therapy) (Table 2). A smaller  
14 number of reviews investigated health information systems (n=13, 7%) (e.g., paediatric track  
15 and trigger systems for hospitalized children), the use of ICT (n=13, 7%) (e.g., ICT  
16 interventions for reducing inappropriate imaging and testing) and smart home technology  
17 (n=1, 0.5%) (e.g., remote monitoring of patients discharged from hospital with heart failure).  
18  
19  
20  
21  
22  
23  
24  
25  
26  
27  
28

29 The majority of reviews in this category focused on changes to information and  
30 communication technology systems for delivering mental health care (n=44, 23%), while 39  
31 (21%) focused on delivery of lifestyle changes and preventative strategies for health (n=39,  
32 21%) (Supplementary file 3). There were two empty Cochrane reviews in this category. The  
33 first focused on the use of email for communicating results of diagnostic medical  
34 investigations to patients, the second focused on telerehabilitation for people with low  
35 vision.  
36  
37  
38  
39  
40  
41  
42  
43  
44  
45  
46  
47

## 48 **6. Goal-focused reviews**

49  
50  
51 There were 38 systematic reviews included in this category, including 7 (18%) Cochrane  
52 reviews. Of 1255 primary studies in this category, 869 (6%) were randomised controlled  
53 trials. A number of these reviews investigated interventions designed to address health  
54 disparities and social determinants of health (14 reviews). These covered a wide range of  
55  
56  
57  
58  
59  
60



1  
2  
3 interventions, some targeting particular populations (e.g., for improving access for the  
4 homeless to primary care) while others focused on any intervention to reduce health  
5 disparities amongst racial and ethnic minority populations (e.g., community coalition-driven  
6 interventions, and cultural adaptations of interventions to change behavior). A further 13  
7 reviews investigated strategies to improve medication or treatment adherence, some  
8 targeting particular conditions (e.g., pharmacy care and brief messaging to improve  
9 medication adherence in type 2 diabetes), other targeting particular medications (e.g., lipid  
10 lowering medications).

### 23 **Resource use outcomes and inclusion of economic evaluation studies**

24  
25  
26  
27 Figure 3 provides a summary of included reviews published by year (excluding 2017 as the  
28 search of the available literature was not conducted for the full 2017 calendar year)  
29 including (i) number of reviews which specified cost as an outcome of interest or aimed to  
30 include economic evaluations, and (ii) number of reviews that included at least one primary  
31 study reporting on costs or economic evaluation. A total of 177 (32%) reviews included costs  
32 and/or economic analysis as an outcome of interest, with only 124 reporting at least one  
33 primary study including one of these economic outcomes. Resource use (including  
34 healthcare resources e.g. length of stay or number of visits to provider, non-healthcare  
35 resources e.g., transportation costs, patient and caregiver time) were collected in 161 (30%)  
36 of reviews (Table 1).

### 52 **Discussion**

53  
54  
55  
56 This scoping review describes the extent, range and nature of synthesised evidence of  
57 alternative models of healthcare delivery relevant to high-income countries published in the  
58  
59  
60

1  
2  
3 past five years. It identified 531 reviews of interventions that involved changes to how and  
4 when care is delivered (47 reviews); where care is provided and changes to the healthcare  
5 environment (55 reviews); who provides care and how the healthcare workforce is managed  
6 (80 reviews); co-ordination of care and management of care processes (122 reviews); ICT  
7 systems (189 reviews); and reviews of interventions addressing a goal-focused question (38  
8 reviews).

9  
10  
11 We identified variability in the distribution of systematic reviews across the categories of  
12 the Cochrane EPOC taxonomy for delivery arrangement interventions – some interventions,  
13 such as telehealth and role expansion or substitution, received substantially more attention  
14 than others. There were a number of delivery arrangement categories with few published  
15 systematic reviews, such as provision of care in a group instead of as an individual, use of  
16 triage systems for managing healthcare delivery, changes to the size of healthcare  
17 organisations or length of consultations, use of packages of care, or smart home  
18 technologies. Since the aim of this scoping review was not to examine the extent, range and  
19 nature of primary research in this area, it is unclear whether the limited number of reviews  
20 on these topics is due to few primary studies or other factors.

21  
22  
23 Technological advances over the past decade has seen a rapidly changing healthcare  
24 landscape that likely explains the large number of reviews we found in the telehealth sub-  
25 category. The intense interest in technology belies the barriers associated with their uptake  
26 and use, including the upfront and ongoing financial investment in equipment, licensing and  
27 software required [23], real or perceived privacy risks, and funding systems that do not  
28 always support the delivery of healthcare in this way [24]. They are advocated as having  
29  
30  
31  
32  
33  
34  
35  
36  
37  
38  
39  
40  
41  
42  
43  
44  
45  
46  
47  
48  
49  
50  
51  
52  
53  
54  
55  
56  
57  
58  
59  
60

1  
2  
3 potential to enhance care delivery, with the promise of improved capacity for patients to be  
4  
5 cared for at home, and improved access for those living rurally or remotely.  
6  
7

8  
9 Over the past 10 years there has also been a proliferation of policy decisions both in  
10  
11 Australia and elsewhere that have encouraged the development of new or expanded  
12  
13 workforce roles to address human resource shortages.[25-28] The large number of  
14  
15 systematic reviews in this subcategory likely reflects the extensive investment in this area  
16  
17 over this time. In addition, there may be other drivers of role expansion for specific health  
18  
19 workers e.g. with changes to legislation around supply of pharmaceuticals, and a growth in  
20  
21 'supermarket pharmacies', there is greater potential for pharmacists to take on additional  
22  
23 non-dispensing roles.  
24  
25  
26  
27

28  
29 While almost all included reviews reported on patient outcomes, only a third of reviews  
30  
31 included resource use as an outcome and/or searched for an incorporated economic  
32  
33 evaluation studies. Evidence about the economic impact of changes to the way in which  
34  
35 healthcare services are organised and delivered is likely to become increasingly important to  
36  
37 those making decisions about system redesign and improvement. The lack of economic  
38  
39 evaluations in the majority of systematic reviews of delivery arrangements means that the  
40  
41 value of many of these models is unknown. Therefore it is important that the impact of  
42  
43 alternative delivery arrangement interventions on these outcomes be considered in future  
44  
45 reviews.  
46  
47  
48  
49

50  
51  
52 There are a number of strengths and limitations to this scoping review. Two authors  
53  
54 independently screened and selected reviews, thus minimising the likelihood of omitting  
55  
56 eligible reviews. While independent data extraction of by two review authors was not  
57  
58 feasible due to the large number of included reviews (and is not recommended in methods  
59  
60

1  
2  
3 guidance for scoping reviews [20]), we did take steps to optimise consistency in data  
4  
5 extraction[16]. As this scoping review sought to map the state of the literature in this area,  
6  
7 we did not appraise the quality of the included reviews and did not attempt to synthesise  
8  
9 the results of the included systematic reviews. The search was limited to the last five years  
10  
11 and only abstracts published on PDQ-Evidence and filtered by the 'intervention' category  
12  
13 were included. We used the Cochrane EPOC taxonomy for delivery arrangement  
14  
15 interventions to map the extent, range and nature of systematic review evidence about  
16  
17 alternative models of care delivery but categorisation was not always straightforward. This  
18  
19 was because interventions could sometimes be categorised to more than one category (e.g.  
20  
21 information technology used to improve coordination of care). In these instances the review  
22  
23 team discussed and reached consensus on the categorisation of reviews (see Supplementary  
24  
25 file 2). Due to the nature of delays between publication, indexing by databases, and capture  
26  
27 allocation to the 'intervention' category by PDQ-Evidence, there may be eligible systematic  
28  
29 reviews published during our search period but not captured in our search. Since the date of  
30  
31 our last search we have identified 31 systematic reviews indexed in PDQ-Evidence that are  
32  
33 potentially eligible for this scoping review. Given this modest volume (5% of current total),  
34  
35 addition of this evidence is unlikely to substantially alter the conclusions.  
36  
37  
38  
39  
40  
41  
42  
43  
44  
45

46 Finally, this review focused on changes in how, when and where healthcare is organised and  
47  
48 delivered, and who delivers care and thus excluded consideration of alternatives focused on  
49  
50 changes to financial arrangements (e.g. changes to how funds are collected, insurance  
51  
52 schemes, purchasing of services, use of incentives/disincentives), governance arrangements  
53  
54 (changes in rules or processes that determine authority and accountability), and  
55  
56 implementation strategies (aimed at bringing about changes in behaviour of healthcare  
57  
58  
59  
60

1  
2  
3 professionals or organisations). Mapping the synthesised evidence focused on these  
4  
5 interventions relevant to high-income countries could be described in future scoping  
6  
7 reviews.  
8  
9

10  
11 The findings of this review raise questions that could be investigated in future research.  
12  
13 These include exploring to what extent have identified systematic reviews informed policy  
14  
15 decisions in Australia and elsewhere? To what extent have decisions to undertake  
16  
17 systematic reviews of delivery arrangements been driven by the needs of decision-makers  
18  
19 versus other motivations? And how can the alignment between review production and the  
20  
21 needs of decision-makers be improved? Priority setting approaches that engage both health  
22  
23 policy makers and researchers/ producers of reviews are likely to increase the availability of  
24  
25 reviews relevant to policy and reduce unnecessary duplication of effort. Exploring the need  
26  
27 for, and addressing the gaps in, reviews of alternative delivery arrangements highlighted by  
28  
29 our review could also be the focus of future work.  
30  
31  
32  
33  
34  
35

36  
37 The results of the scoping review have informed a Delphi survey to prioritise the most  
38  
39 promising alternatives for further investigation. The survey was delivered in two rounds to  
40  
41 an Australian panel of policy, clinician, manager, consumer and academic representatives.  
42  
43 The next steps include conducting (or updating where relevant) systematic reviews of  
44  
45 delivery arrangements ranked as important to the panel, and undertaking pilot evaluations  
46  
47 (including economic) of high priority, promising alternative delivery arrangements in  
48  
49 collaboration with healthcare system partners.  
50  
51  
52  
53

## 54 55 **CONCLUSION** 56 57 58 59 60

1  
2  
3 A substantial body of evidence about the effects of a wide range of delivery arrangements is  
4 available to inform health system improvements. Most of the available evidence focuses on  
5 alternative information and communication technology systems and care coordination  
6 models. This scoping review provides a map of the extent, range and nature of available  
7 synthesised evidence and identifies gaps where research efforts could be directed, i.e. in  
8 updating out-of-date reviews or conducting reviews where no reviews currently exist.  
9  
10  
11  
12  
13  
14  
15  
16  
17

### 18 **CONFLICTS OF INTEREST**

19  
20  
21  
22 None to declare.  
23  
24

### 25 **FUNDING**

26  
27  
28  
29 This work was supported by an NHMRC Partnership Centre for Health System Sustainability  
30 (Grant ID: 9100002). Along with the NHMRC, the funding partners in this research  
31 collaboration are: BUPA Health Foundation; NSW Health; Department of Health, Western  
32 Australia; and The University of Notre Dame Australia. RB is funded by an NHMRC Senior  
33 Principal Research Fellowship (#APP1082138). Denise O'Connor is supported by a NHMRC  
34 Translating Research into Practice Fellowship (APP1168749).  
35  
36  
37  
38  
39  
40  
41  
42  
43  
44

### 45 **AUTHORS' CONTRIBUTIONS**

46  
47  
48 The study conception and overall design was conceived by RB and DAO. RLJ, DAO and PP  
49 designed the data extraction tool and RLJ, PP, KR and JN all assisted in piloting. RLJ wrote  
50 the first draft of this protocol and RB, DAO, PP, KR, JN, SC and SS critically reviewed the  
51 manuscript, contributed improvements and approved the final version.  
52  
53  
54  
55  
56  
57  
58

### 59 **PATIENT AND PUBLIC INVOLVEMENT**



1  
2  
3 The Australian NHMRC Partnership Centre for Health Systems Sustainability brings together  
4  
5 researchers, policy-makers, providers, clinicians and consumers, the latter represented by  
6  
7 the Consumers Health Forum of Australia. Consumers have a voice in setting the objectives  
8  
9 of the Partnership Centre and were consulted when framing the scope of this review.  
10  
11  
12

### 13 14 **DATA STATEMENT**

15  
16  
17 All data is presented in the manuscript and supplementary material.  
18  
19  
20  
21  
22  
23  
24  
25  
26  
27  
28  
29  
30  
31  
32  
33  
34  
35  
36  
37  
38  
39  
40  
41  
42  
43  
44  
45  
46  
47  
48  
49  
50  
51  
52  
53  
54  
55  
56  
57  
58  
59  
60

**Table 1 Review characteristics**

| <b>Review characteristics (n=531)</b>                                                                                                                           | <b>Count (%)</b> |
|-----------------------------------------------------------------------------------------------------------------------------------------------------------------|------------------|
| Year of publication                                                                                                                                             |                  |
| 2012                                                                                                                                                            | 50 (9%)          |
| 2013                                                                                                                                                            | 79 (15%)         |
| 2014                                                                                                                                                            | 67 (12.5%)       |
| 2015                                                                                                                                                            | 111 (21%)        |
| 2016                                                                                                                                                            | 216 (41%)        |
| 2017*                                                                                                                                                           | 8 (1.5%)         |
| Cochrane reviews                                                                                                                                                | 125 (24%)        |
| Included primary studies (all designs) per review (Mean (SD)) [range]                                                                                           | 23 (37) [0-463]  |
| Reviews including randomised controlled trials                                                                                                                  | 245 (46%)        |
| Health conditions/ populations                                                                                                                                  |                  |
| Common chronic diseases<br>(e.g. diabetes, chronic obstructive pulmonary disease, heart failure,<br>chronic kidney failure, asthma, musculoskeletal conditions) | 106 (20%)        |
| Cancer                                                                                                                                                          | 21 (4%)          |
| Critically or terminally ill                                                                                                                                    | 16 (3%)          |
| Patients undergoing lifestyle and prevention interventions                                                                                                      | 53 (10%)         |
| Patients undergoing surgical interventions (including preoperative<br>care and safety checklists)                                                               | 18 (3%)          |
| Mental Health conditions                                                                                                                                        | 67 (12%)         |
| Older adults and aged care                                                                                                                                      | 17 (3%)          |
| Non-communicable diseases (e.g., viral hepatitis, HIV, TB)                                                                                                      | 17 (3%)          |
| Maternal and child health                                                                                                                                       | 38 (7%)          |
| Outcomes reported                                                                                                                                               |                  |
| Patient outcomes (health status and/or health behaviours e.g.,<br>mortality, morbidity, cure rates)                                                             | 492 (93%)        |
| Quality of care (e.g. adherence to recommended practice)                                                                                                        | 62 (12%)         |
| Access and/or utilisation of healthcare services (e.g., waiting time to<br>receive care, readmission rates, length of stay in a facility)                       | 178 (34%)        |
| Resource use (including healthcare resources, non-healthcare<br>resources e.g., transportation costs, patient and caregiver time)                               | 161 (30%)        |
| Impacts on equity                                                                                                                                               | 30 (6%)          |
| Social outcomes (e.g., poverty, unemployment)                                                                                                                   | 15 (3%)          |
| Healthcare provider outcomes (e.g., wellbeing, fatigue, stress,<br>satisfaction)                                                                                | 68 (13%)         |
| Adverse effects                                                                                                                                                 | 93 (18%)         |
| Reviews incorporating economic evaluation studies                                                                                                               | 177 (33%)        |

\*Incomplete

**Table 2: Summary of included reviews organised according to the Cochrane EPOC Taxonomy of delivery arrangement interventions**

| Delivery arrangement by EPOC Taxonomy category and subcategory                 | EPOC Definition                                                                                                                                                            | No of reviews (no. of Cochrane reviews) | No of primary studies (RCTs) | No of empty reviews | Types of interventions (see Supplementary file 2 for detail)                                                                                                                                                                                                                                                                                                                                                                                                                                                                                                                                                                                                                                                                                                                                                                                                                                                                                                                             |
|--------------------------------------------------------------------------------|----------------------------------------------------------------------------------------------------------------------------------------------------------------------------|-----------------------------------------|------------------------------|---------------------|------------------------------------------------------------------------------------------------------------------------------------------------------------------------------------------------------------------------------------------------------------------------------------------------------------------------------------------------------------------------------------------------------------------------------------------------------------------------------------------------------------------------------------------------------------------------------------------------------------------------------------------------------------------------------------------------------------------------------------------------------------------------------------------------------------------------------------------------------------------------------------------------------------------------------------------------------------------------------------------|
| <b>How and when care is delivered (n= 47)</b>                                  |                                                                                                                                                                            |                                         |                              |                     |                                                                                                                                                                                                                                                                                                                                                                                                                                                                                                                                                                                                                                                                                                                                                                                                                                                                                                                                                                                          |
| Queuing strategies                                                             | A reduction or increase in time to access a healthcare intervention, for example managed waiting lists, managing ER wait time                                              | 7 (2)                                   | 112 (22)                     | 1                   | <ul style="list-style-type: none"> <li>- Emergency department (ED) visit reduction programs</li> <li>- Improving patient flow and quality of care in the ED</li> <li>- Interventions to reduce waiting times for elective surgical procedures</li> <li>- Patient initiated clinics for patients with chronic or recurrent conditions managed in secondary care</li> </ul>                                                                                                                                                                                                                                                                                                                                                                                                                                                                                                                                                                                                                |
| Group versus individual care                                                   | Providing care to groups versus individual patients                                                                                                                        | 5 (1)                                   | 134 (124)                    | 0                   | <ul style="list-style-type: none"> <li>- Group clinics (chronic conditions, antenatal care)</li> </ul>                                                                                                                                                                                                                                                                                                                                                                                                                                                                                                                                                                                                                                                                                                                                                                                                                                                                                   |
| Quality and safety systems                                                     | Essential standards for quality of healthcare, and reduction of poor outcomes related to unsafe healthcare                                                                 | 33 (11)                                 | 774 (246)                    | 0                   | <ul style="list-style-type: none"> <li>- Immediate versus deferred delivery of the preterm baby with suspected foetal compromise for improving outcomes</li> <li>- Implementation of guidelines and evidence-based care</li> <li>- Improving integrated care models in chronic diseases</li> <li>- Interventions to increase breastfeeding uptake</li> <li>- Medication reconciliation interventions at hospital</li> <li>- Patient safety interventions</li> <li>- Promoting hand hygiene</li> <li>- Promoting use of guidelines and evidence-based medicine</li> <li>- Reducing disparities in health and health care</li> <li>- Reducing exposure to ionizing radiation from medical imaging</li> <li>- Reducing medication over-prescription (antibiotic use, opioid prescription, administration errors in children and adults, inappropriate prescribing in elderly)</li> <li>- Using interpreters for non-English speakers on the delivery of palliative care (cancer)</li> </ul> |
| Triage                                                                         | Management of patients attending a healthcare facility, or contacting a healthcare professional by phone, and receiving advice or being referral to an appropriate service | 2 (0)                                   | 65 (2)                       | 0                   | <ul style="list-style-type: none"> <li>- Improving patient flow and quality of care in the ED</li> <li>- Pharmacist involvement in care for patients with chronic disease</li> </ul>                                                                                                                                                                                                                                                                                                                                                                                                                                                                                                                                                                                                                                                                                                                                                                                                     |
| <b>Where care is provided and changes to the healthcare environment (n=55)</b> |                                                                                                                                                                            |                                         |                              |                     |                                                                                                                                                                                                                                                                                                                                                                                                                                                                                                                                                                                                                                                                                                                                                                                                                                                                                                                                                                                          |
| Environment                                                                    | Changes to the physical or sensory healthcare environment, by adding or altering equipment or layout, providing music, art                                                 | 1 (1)                                   | 1 (1)                        | 0                   | <ul style="list-style-type: none"> <li>- Environmental interventions to increase breastfeeding uptake while mothers are in hospital</li> </ul>                                                                                                                                                                                                                                                                                                                                                                                                                                                                                                                                                                                                                                                                                                                                                                                                                                           |
| Outreach services                                                              | Visits by health workers to different locations, for example involving specialists, generalists, mobile units                                                              | 1 (1)                                   | 2 (2)                        | 0                   | <ul style="list-style-type: none"> <li>- Mobile clinics for women's and children's health</li> </ul>                                                                                                                                                                                                                                                                                                                                                                                                                                                                                                                                                                                                                                                                                                                                                                                                                                                                                     |
| Site of service delivery                                                       | Changes in where care is provided, for example home vs. healthcare facility, inpatient vs outpatient,                                                                      | 51 (20)                                 | 956 (320)                    | 1                   | <ul style="list-style-type: none"> <li>- Alternatives to hospitalisations: outpatient management, quick diagnostic units, hospital-at-home, observation units (for induction of labour,</li> </ul>                                                                                                                                                                                                                                                                                                                                                                                                                                                                                                                                                                                                                                                                                                                                                                                       |

1  
2  
3  
4  
5  
6  
7  
8  
9  
10

| Delivery arrangement by EPOC Taxonomy category and subcategory        | EPOC Definition                                                                                                                                                      | No of reviews (no. of Cochrane reviews) | No of primary studies (RCTs) | No of empty reviews | Types of interventions (see Supplementary file 2 for detail)                                                                                                                                                                                                                                                                                                                                                                                                                                                                                                                                                                                                                                                                                                                                                                                         |
|-----------------------------------------------------------------------|----------------------------------------------------------------------------------------------------------------------------------------------------------------------|-----------------------------------------|------------------------------|---------------------|------------------------------------------------------------------------------------------------------------------------------------------------------------------------------------------------------------------------------------------------------------------------------------------------------------------------------------------------------------------------------------------------------------------------------------------------------------------------------------------------------------------------------------------------------------------------------------------------------------------------------------------------------------------------------------------------------------------------------------------------------------------------------------------------------------------------------------------------------|
|                                                                       | specialised vs. non-specialised facility, walk in clinics, medical day hospital, mobile units                                                                        |                                         |                              |                     | <ul style="list-style-type: none"> <li>intravenous antibiotic therapy for cystic fibrosis, cardiac arrest, kidney dialysis, COPD, psychosis, paediatric care.)</li> <li>- ED-based interventions (for managing alcohol misuse, domestic violence, palliative care)</li> <li>- Home visiting (for pregnancy, child health and maltreatment, social determinants of health, partner violence)</li> <li>- Home-based prevention and rehabilitation</li> <li>- The patient centred medical home</li> <li>- Pre-hospital intervention for sepsis</li> <li>- Reaching youth with out-of-facility services (HIV and reproductive health)</li> <li>- School-based health centres for mental health, social determinants of health</li> <li>- Therapeutic communities for mental health</li> <li>- Waiting room-based interventions to prevent STD</li> </ul> |
| Size of organisations                                                 | Increasing or decreasing the size of health service provider units                                                                                                   | 1 (1)                                   | 5 (0)                        | 0                   | - Centralisation, specialisation and increasing volume of services to promote quality (e.g. cancer care and surgery)                                                                                                                                                                                                                                                                                                                                                                                                                                                                                                                                                                                                                                                                                                                                 |
| Transportation services                                               | Arrangements for transporting patients from one site to another                                                                                                      | 1 (1)                                   | 38 (0)                       | 0                   | - Helicopter emergency medical services for adults with major trauma                                                                                                                                                                                                                                                                                                                                                                                                                                                                                                                                                                                                                                                                                                                                                                                 |
| <b>Who provides care and how the workforce is managed (n= 80)</b>     |                                                                                                                                                                      |                                         |                              |                     |                                                                                                                                                                                                                                                                                                                                                                                                                                                                                                                                                                                                                                                                                                                                                                                                                                                      |
| Role expansion or task shifting                                       | Expanding tasks undertaken by a cadre of health workers or shifting tasks from one cadre to another, to include tasks not previously part of their scope of practice | 65 (12)                                 | 1110 (586)                   | 1                   | <ul style="list-style-type: none"> <li>- Advanced practice nursing in older people and in long-term care</li> <li>- Advanced trauma life support training for hospital health professional and ambulance crews</li> <li>- Carer involvement in cognition-based interventions for people with dementia</li> <li>- Community-based health worker interventions</li> <li>- Interventions to increase breastfeeding</li> <li>- Nurse-physician substitution</li> <li>- Peer-led interventions (e.g., in mental health)</li> <li>- Pharmacist involvement in care for patients with chronic conditions</li> <li>- Primary care-led provision of care (e.g., GP's working in ED)</li> <li>- Radiographers in advanced roles</li> </ul>                                                                                                                     |
| Self-management                                                       | Shifting or promoting the responsibility for healthcare or disease management to patients or their families                                                          | 15 (6)                                  | 298 (216)                    | 0                   | <ul style="list-style-type: none"> <li>- Patient navigation (breast cancer)</li> <li>- Promoting self-management (in chronic diseases, specifically HIV, diabetes foot care, COPD, asthma, children with epilepsy, anxiety, MS, IBS; self-administration of medication in the hospital, oral anticoagulation, home uterine monitoring for detecting preterm labour)</li> <li>- Reducing medication and over-prescription (antibiotic use, opioid prescription, administration errors in children and adults, inappropriate prescribing in elderly)</li> </ul>                                                                                                                                                                                                                                                                                        |
| <b>Co-ordination of care and management of care processes (n=122)</b> |                                                                                                                                                                      |                                         |                              |                     |                                                                                                                                                                                                                                                                                                                                                                                                                                                                                                                                                                                                                                                                                                                                                                                                                                                      |
| Integrated healthcare systems                                         | Consolidating the provision of different healthcare services to one (or simply fewer) facilities                                                                     | 16 (3)                                  | 406 (258)                    | 0                   | - Integrated care models for various conditions                                                                                                                                                                                                                                                                                                                                                                                                                                                                                                                                                                                                                                                                                                                                                                                                      |
| Shared                                                                | Sharing healthcare decision making                                                                                                                                   | 14 (5)                                  | 487 (393)                    | 0                   | - Educational interventions for patients and carers                                                                                                                                                                                                                                                                                                                                                                                                                                                                                                                                                                                                                                                                                                                                                                                                  |

| Delivery arrangement by EPOC Taxonomy category and subcategory | EPOC Definition                                                                                                                                                                                        | No of reviews (no. of Cochrane reviews) | No of primary studies (RCTs) | No of empty reviews | Types of interventions (see Supplementary file 2 for detail)                                                                                                                                                                                                                                                                                                                                                                                                                                                                                                                                             |
|----------------------------------------------------------------|--------------------------------------------------------------------------------------------------------------------------------------------------------------------------------------------------------|-----------------------------------------|------------------------------|---------------------|----------------------------------------------------------------------------------------------------------------------------------------------------------------------------------------------------------------------------------------------------------------------------------------------------------------------------------------------------------------------------------------------------------------------------------------------------------------------------------------------------------------------------------------------------------------------------------------------------------|
| decision making                                                | responsibilities among different individuals, potentially including the patient.                                                                                                                       |                                         |                              |                     | <ul style="list-style-type: none"> <li>- Improving healthcare professionals skills (e.g. communication in cancer, performance in nursing homes, recognition and management of deteriorating patients, genetic education)</li> <li>- Promoting adoption of Shared Decision Making</li> <li>- Reducing medication and over prescription</li> <li>- Shared decision making in pregnancy and delivery, treatment in older people and cancer screening</li> </ul>                                                                                                                                             |
| Packages of care                                               | Introduction, modification, or removal of packages of services designed to be implemented together for a particular diagnosis/disease, e.g. tuberculosis management guidelines, newborn care protocols | 1 (1)                                   | 5 (5)                        | 0                   | <ul style="list-style-type: none"> <li>- Care delivery models/disease management</li> </ul>                                                                                                                                                                                                                                                                                                                                                                                                                                                                                                              |
| Case management                                                | Introduction, modification or removal of strategies to improve the coordination and continuity of delivery of services i.e. improving the management of one "case" (patient)                           | 14 (4)                                  | 375 (260)                    | 0                   | <ul style="list-style-type: none"> <li>- Advance care planning (e.g., haemodialysis patients, palliative care, end-of-life interventions)</li> <li>- Case management in chronic diseases, specifically CVD, diabetes type 2, cancer, childhood obesity, haemophilia, mental health, multi-morbidities, chronic viral hepatitis</li> <li>- Outpatient case management</li> </ul>                                                                                                                                                                                                                          |
| Disease management                                             | Programs designed to manage or prevent a chronic condition using a systematic approach to care and potentially employing multiple ways of influencing patients, providers or the process of care       | 16 (3)                                  | 298 (169)                    | 1                   | <ul style="list-style-type: none"> <li>- Adolescent-specific prenatal interventions on improving attendance and reducing harm during and after birth</li> <li>- Care delivery models/disease management</li> <li>- Chronic Disease Management – asthma</li> <li>- Improving healthcare professionals skills</li> <li>- Outpatient management of cardio-metabolic risk factor control in people with diabetes</li> </ul>                                                                                                                                                                                  |
| Care pathways                                                  | Aim to link evidence to practice for specific health conditions and local arrangements for delivering care.                                                                                            | 8 (2)                                   | 99 (24)                      | 0                   | <ul style="list-style-type: none"> <li>- Advanced care planning</li> <li>- Care delivery models/disease management</li> <li>- Critical Care</li> <li>- Interventions to improve linkage with or retention in HIV services</li> <li>- Rapid response systems to reduce hospital mortality</li> </ul>                                                                                                                                                                                                                                                                                                      |
| Teams                                                          | Creating and delivering care through a multidisciplinary team of healthcare workers.                                                                                                                   | 22 (4)                                  | 398 (229)                    | 1                   | <ul style="list-style-type: none"> <li>- Multidisciplinary team care for dementia and other mental health conditions, older adults, epilepsy, asthma, HIV, heart failure, chronic cough in children, antenatal care., chronic diseases management, specifically CVD, diabetes type 2, cancer, childhood obesity, haemophilia, multi-morbidities, chronic viral hepatitis.</li> <li>- Team interventions to promote work participation in people with regional musculoskeletal pain</li> <li>- Multidisciplinary team care in. chronic disease</li> <li>- Multidisciplinary team neonatal care</li> </ul> |
| Communication between providers                                | Systems or strategies for improving the communication between health care providers                                                                                                                    | 6 (2)                                   | 105 (44)                     | 0                   | <ul style="list-style-type: none"> <li>- Improving clinical communication in hospitals, between primary and secondary care</li> <li>- Improving patient handovers from hospital to primary care and vice versa</li> </ul>                                                                                                                                                                                                                                                                                                                                                                                |
| Transition of care                                             | Interventions to improve transition from one care provider to another                                                                                                                                  | 7 (0)                                   | 138 (26)                     | 0                   | <ul style="list-style-type: none"> <li>- Transition from paediatric to adult care settings or services</li> </ul>                                                                                                                                                                                                                                                                                                                                                                                                                                                                                        |
| Discharge planning                                             | An individualised plan of discharge to facilitate the transfer of a patient                                                                                                                            | 18 (4)                                  | 243 (211)                    | 0                   | <ul style="list-style-type: none"> <li>- Early supported discharge planning (acute stroke, COPD, older adults, children with cancer and</li> </ul>                                                                                                                                                                                                                                                                                                                                                                                                                                                       |

| Delivery arrangement by EPOC Taxonomy category and subcategory  | EPOC Definition                                                                                                                                                                                   | No of reviews (no. of Cochrane reviews) | No of primary studies (RCTs) | No of empty reviews | Types of interventions (see Supplementary file 2 for detail)                                                                                                                                                                                                                                                                                                                                                                                                                                                                                                                                                                                                                 |
|-----------------------------------------------------------------|---------------------------------------------------------------------------------------------------------------------------------------------------------------------------------------------------|-----------------------------------------|------------------------------|---------------------|------------------------------------------------------------------------------------------------------------------------------------------------------------------------------------------------------------------------------------------------------------------------------------------------------------------------------------------------------------------------------------------------------------------------------------------------------------------------------------------------------------------------------------------------------------------------------------------------------------------------------------------------------------------------------|
|                                                                 | from hospital to a post-discharge setting                                                                                                                                                         |                                         |                              |                     | febrile neutropenia)<br>- Fast-track surgery programs (liver surgery)<br>- Providing written information to reduce re-admissions in heart failure<br>- Transitional care management after hospital discharge to reduce 30-day readmission rates                                                                                                                                                                                                                                                                                                                                                                                                                              |
| <b>Information and communication technology systems (n=189)</b> |                                                                                                                                                                                                   |                                         |                              |                     |                                                                                                                                                                                                                                                                                                                                                                                                                                                                                                                                                                                                                                                                              |
| Health information systems                                      | Health record and health management systems to store and manage patient health information, for example electronic patient records, or systems for recalling patients for follow-up or prevention | 13 (4)                                  | 718 (118)                    | 0                   | - Health notes vs EMR in pregnancy<br>- Interventions to improve attendance of appointments<br>- Paediatric track and trigger systems for hospitalised children<br>- Patient safety interventions that use technology<br>- Recall intervals (for dental visits, women with history of gestational diabetes, TB appointments)<br>- Reminder interventions to improve treatment adherence<br>- The use of medical scribes in healthcare settings                                                                                                                                                                                                                               |
| The use of information and communication technology             | Technology-based methods to transfer healthcare information and support the delivery of care                                                                                                      | 13 (1)                                  | 627 (250)                    | 0                   | - Computerised clinical decision support to enable patient-centred care (nutrition informatics, advice on drug dosage)<br>- Medication organization devices<br>- Medication reconciliation interventions in hospital<br>- Multimedia educational interventions for consumers about prescribed and over-the-counter medications<br>- Patient portals<br>- IT interventions for reducing inappropriate imaging and testing (e.g. cardiac, low-back pain imaging, lab tests ordering by GPs)<br>- IT interventions for reducing medication use? and over-prescription<br>- Serious games for professional training and patient education (e.g. chronic diseases, mental health) |
| Smart home technologies                                         | Electronic assistive technologies                                                                                                                                                                 | 1 (0)                                   | 48 (9)                       | 0                   | - Remote monitoring (e.g. after recent hospital discharge with heart failure, in older adults, asthma)                                                                                                                                                                                                                                                                                                                                                                                                                                                                                                                                                                       |
| Telehealth                                                      | Exchange of healthcare information from one site to another via electronic communication                                                                                                          | 162 (29)                                | 3533 (2527)                  | 2                   | - Self-care applications<br>- Social networks and social media<br>- Telecoaching (telephone counselling, peer support programs, automated telephone messaging, web-based programs e.g., cognitive behavioural therapy for mental health conditions, coaching for chronic disease)<br>- Telehealth (email communication, mobile phone messaging, mobile phone technology, mobile technology, or range of intervention types)<br>- Telemedicine (screening, telerehabilitation, telemonitoring)                                                                                                                                                                                |
| <b>Goal-focused reviews (n=38)</b>                              |                                                                                                                                                                                                   |                                         |                              |                     |                                                                                                                                                                                                                                                                                                                                                                                                                                                                                                                                                                                                                                                                              |
| Interventions to address social determinants of health          |                                                                                                                                                                                                   | 14 (2)                                  | 319 (123)                    | 0                   | - Culturally appropriate prevention and care (indigenous populations, racial-ethnic minorities, low socio-economic populations)<br>- Eliminating repeat unintended pregnancy in teenagers<br>- Improving access to healthcare for homeless people<br>- Interventions to address social determinants of                                                                                                                                                                                                                                                                                                                                                                       |



| Delivery arrangement by EPOC Taxonomy category and subcategory | EPOC Definition                                             | No of reviews (no. of Cochrane reviews) | No of primary studies (RCTs) | No of empty reviews | Types of interventions (see Supplementary file 2 for detail)                                                                           |
|----------------------------------------------------------------|-------------------------------------------------------------|-----------------------------------------|------------------------------|---------------------|----------------------------------------------------------------------------------------------------------------------------------------|
|                                                                |                                                             |                                         |                              |                     | health for minority populations (ethnic and race disparities)                                                                          |
|                                                                | Improving medication adherence                              | 11 (2)                                  | 654 (551)                    | 0                   | - Interventions aimed at improving medication adherence (e.g. chronic diseases, specifically diabetes, HIV, CVD; in ethnic minorities) |
|                                                                | Addressing multimorbidity in primary care                   | 1 (1)                                   | 18 (18)                      | 0                   | - Interventions addressing multi-morbidity in primary care                                                                             |
|                                                                | Preventing readmissions                                     | 1                                       | 42 (42)                      | 0                   | - Interventions for preventing unplanned 30-day hospital readmissions                                                                  |
|                                                                | Reducing inappropriate imaging and testing                  | 3                                       | 24 (6)                       | 0                   | - Interventions for reducing inappropriate imaging and testing                                                                         |
|                                                                | Meeting family needs of the critically ill                  | 1                                       | 14 (1)                       | 0                   | - Meeting family needs of critically ill patients in an ICU                                                                            |
|                                                                | Communicating contraceptive effectiveness                   | 1 (1)                                   | 7 (7)                        | 0                   | - Communicating contraceptive effectiveness                                                                                            |
|                                                                | Improving adherence to treatment                            | 2                                       | 38 (35)                      | 0                   | - Improving adherence to treatment in children with chronic diseases and adult heart transplant patients                               |
|                                                                | Interventions to increase retention in health care services | 1 (1)                                   | 11 (9)                       | 0                   | - Interventions to increase retention in mental health services                                                                        |
|                                                                | Interventions to increase vaccine uptake                    | 3                                       | 128 (77)                     | 0                   | - Interventions to increase vaccine uptake in children and the elderly                                                                 |
| <b>Total</b>                                                   |                                                             | <b>531</b>                              | <b>12,230 (6911)</b>         | <b>7</b>            |                                                                                                                                        |

1  
2  
3 Figure 1. PRISMA Flow Diagram  
4  
5

6  
7 Figure 2. Number of included reviews organised according to the Cochrane EPOC taxonomy  
8 of delivery arrangement interventions  
9

10  
11  
12 Figure 3. Summary of included reviews by year of publication (2012-2016) and incorporating  
13 economic analyses  
14  
15  
16  
17  
18  
19  
20  
21  
22  
23  
24  
25  
26  
27  
28  
29  
30  
31  
32  
33  
34  
35  
36  
37  
38  
39  
40  
41  
42  
43  
44  
45  
46  
47  
48  
49  
50  
51  
52  
53  
54  
55  
56  
57  
58  
59  
60

For peer review only

## ReferencesUncategorized References

1. Organisation for Economic Cooperation and Development, *Fiscal sustainability of health systems: bridging health and finance perspectives*. 2015: OECD.
2. Walker, A., *Australia's ageing population*. Vol. no. 27. 1998, Canberra: National Centre for Social and Economic Modelling, University of Canberra.
3. Healey, J., *Ageing*. Vol. 277. 2008, Thirroul, N.S.W: Spinney Press.
4. Moynihan, R., I. Heath, and D. Henry, *Selling sickness: the pharmaceutical industry and disease mongering* *Commentary: Medicalisation of risk factors*. *Bmj*, 2002. **324**(7342): p. 886-891.
5. Glasziou, P., et al., *Too much medicine; too little care*. 2013, British Medical Journal Publishing Group.
6. Hansen, T.W., et al., *Diagnostic Thresholds for Ambulatory Blood Pressure Moving Lower: A Review Based on a Meta-Analysis—Clinical Implications*. *The Journal of Clinical Hypertension* 2008. **10**(5): p. 377-381.
7. Mills, N.L., et al., *Implications of lowering threshold of plasma troponin concentration in diagnosis of myocardial infarction: cohort study*. *Bmj*, 2012. **344**: p. e1533.
8. Forouhi, N., et al., *The threshold for diagnosing impaired fasting glucose: a position statement by the European Diabetes Epidemiology Group*. *Diabetologia*, 2006. **49**(5): p. 822-827.
9. Owens, D.K., et al., *High-value, cost-conscious health care: concepts for clinicians to evaluate the benefits, harms, and costs of medical interventions*. *Annals of internal medicine*, 2011. **154**(3): p. 174-180.
10. Schupbach, J. and A. Chandra, *A Simple Way to Measure Health Care Outcomes*. 2016.
11. Langhorne, P. and S. Baylan, *Early supported discharge services for people with acute stroke*. *The Cochrane Library*, 2017.
12. Martínez-González, N.A., et al., *Substitution of physicians by nurses in primary care: a systematic review and meta-analysis*. *BMC health services research*, 2014. **14**(1): p. 214.
13. Hisashige, A., *The effectiveness and efficiency of disease management programs for patients with chronic diseases*. *Global Journal of Health Science*, 2013. **5**(2): p. 27.
14. Damery, S., S. Flanagan, and G. Combes, *Does integrated care reduce hospital activity for patients with chronic diseases? An umbrella review of systematic reviews*. *BMJ open*, 2016. **6**(11): p. e011952.
15. Ciapponi A, L.S., Herrera CA, Opiyo N, Pantoja T, Paulsen E, Rada G, Wiysonge CS, Bastías G,, F.S. Dudley L, Gagnon MP, Garcia Marti S, Glenton C, Okwundu CI, Peñaloza B, Suleman F,, and O. AD, *Delivery arrangements for health systems in low-income countries: an overview of systematic reviews (Review)*. *Cochrane Database of Systematic Reviews*, 2017(9).
16. Jessup, R.L., et al., *Alternative service models for delivery of healthcare services in high-income countries: a scoping review of systematic reviews*. *BMJ open*, 2019. **9**(1): p. e024385.
17. Tricco, A.C., et al., *PRISMA extension for scoping reviews (PRISMA-ScR): checklist and explanation*. *Annals of internal medicine*, 2018. **169**(7): p. 467-473.
18. Effective Practice and Organisation of Care (EPOC). *The EPOC taxonomy of health systems interventions, EPOC Resources for review authors*. . 2016 August 2018].
19. World Bank. *World Bank Country and Lending Groups*. 2017.
20. Levac, D., H. Colquhoun, and K.K. O'Brien, *Scoping studies: advancing the methodology*. *Implementation science*, 2010. **5**(1): p. 69.
21. Fleming, P.S., et al., *Cochrane and non-Cochrane systematic reviews in leading orthodontic journals: a quality paradigm?* *Eur J Orthod*, 2013. **35**(2): p. 244-8.
22. Useem, J., et al., *Systematic Differences between Cochrane and Non-Cochrane Meta-Analyses on the Same Topic: A Matched Pair Analysis*. *PLoS One*, 2015. **10**(12): p. e0144980.
23. Blumenthal, D., *Stimulating the adoption of health information technology*. *New England journal of medicine*, 2009. **360**(15): p. 1477-1479.

- 1  
2  
3 24. Bradford, N., L. Caffery, and A. Smith, *Telehealth services in rural and remote Australia: a*  
4 *systematic review of models of care and factors influencing success and sustainability*. Rural  
5 and remote health, 2016. **16**(3808).  
6  
7 25. Ford, L.C., *Nurse practitioners: History of a new idea and predictions for the future*. Nursing  
8 in the 1980s: Crises, opportunities, challenges, 1982: p. 231-247.  
9  
10 26. Kersten, P., et al., *Physiotherapy extended scope of practice—who is doing what and why?*  
11 *Physiotherapy*, 2007. **93**(4): p. 235-242.  
12  
13 27. Gilmore, L.G., et al., *Skills escalator in allied health: a time for reflection and refocus*. Journal  
14 of Healthcare Leadership, 2011. **3**: p. 53-58.  
15  
16 28. Ellis, N., L. Robinson, and P.M. Brooks, *Task substitution: where to from here?* Medical  
17 Journal of Australia, 2006. **185**(1): p. 18.  
18  
19  
20  
21  
22  
23  
24  
25  
26  
27  
28  
29  
30  
31  
32  
33  
34  
35  
36  
37  
38  
39  
40  
41  
42  
43  
44  
45  
46  
47  
48  
49  
50  
51  
52  
53  
54  
55  
56  
57  
58  
59  
60

For peer review only



Figure 1. PRISMA Flow Diagram

1  
2  
3  
4  
5  
6  
7  
8  
9  
10  
11  
12  
13  
14  
15  
16  
17  
18  
19  
20  
21  
22  
23  
24  
25  
26  
27  
28  
29  
30  
31  
32  
33  
34  
35  
36  
37  
38  
39  
40  
41  
42  
43  
44  
45  
46  
47  
48  
49  
50  
51  
52  
53  
54  
55  
56  
57  
58  
59  
60



Number of included reviews organised according to the Cochrane EPOC taxonomy of delivery arrangement interventions



Summary of included reviews by year of publication (2012-2016) and incorporating economic analyses



# BMJ Open Alternative service models for delivery of healthcare services in high-income countries: a scoping review of systematic reviews

Rebecca L Jessup,<sup>1,2,3</sup> Denise A O'Connor,<sup>1,2</sup> Polina Putrik,<sup>1,2</sup> Kobi Rischin,<sup>1,2</sup> Janet Nezon,<sup>2</sup> Sheila Cyril,<sup>1,2</sup> Sasha Shepperd,<sup>4</sup> Rachelle Buchbinder<sup>1,2</sup>

**To cite:** Jessup RL, O'Connor DA, Putrik P, *et al*. Alternative service models for delivery of healthcare services in high-income countries: a scoping review of systematic reviews. *BMJ Open* 2019;**9**:e024385. doi:10.1136/bmjopen-2018-024385

► Prepublication history and additional material for this paper are available online. To view these files, please visit the journal online (<http://dx.doi.org/10.1136/bmjopen-2018-024385>).

RLJ and DAO'C contributed equally.

Received 24 May 2018

Revised 4 October 2018

Accepted 28 November 2018



© Author(s) (or their employer(s)) 2019. Re-use permitted under CC BY-NC. No commercial re-use. See rights and permissions. Published by BMJ.

For numbered affiliations see end of article.

## Correspondence to

Dr Rebecca L Jessup;  
rebecca.jessup@monash.edu

## ABSTRACT

**Introduction** Costs associated with the delivery of healthcare services are growing at an unsustainable rate. There is a need for health systems and healthcare providers to consider the economic impacts of the service models they deliver and to determine if alternative models may lead to improved efficiencies without compromising quality of care. The aim of this protocol is to describe a scoping review of the extent, range and nature of available synthesised research on alternative delivery arrangements for health systems relevant to high-income countries published in the last 5 years.

**Design** We will perform a scoping review of systematic reviews of trials and economic studies of alternative delivery arrangements for health systems relevant to high-income countries published on 'Pretty Darn Quick' (PDQ)-Evidence between 1 January 2012 and 20 September 2017. All English language systematic reviews will be included. The Cochrane Effective Practice and Organisation of Care taxonomy of health system interventions will be used to categorise delivery arrangements according to: how and when care is delivered, where care is provided and changes to the healthcare environment, who provides care and how the healthcare workforce is managed, co-ordination of care and management of care processes and information and communication technology systems. This work is part of a 5-year Partnership Centre for Health System Sustainability aiming to investigate and create interventions to improve health-system-performance sustainability.

**Ethics and dissemination** No primary data will be collected, so ethical approval is not required. The study findings will be published and presented at relevant conferences.

## BACKGROUND

The provision of sustainable, appropriate healthcare is an ongoing challenge for health systems worldwide. There are many drivers of increasing healthcare costs. They include growing pressure from an ageing population,<sup>1 2</sup> growth in the prevalence of chronic and preventable diseases, increasing availability of (more expensive) clinical tests and

## Strengths and limitations of this study

- A high-level synthesis of the available evidence for alternative models of health service delivery is much needed and will be a useful resource for decision makers involved in health system planning, health system performance, sustainability initiatives and future research directions.
- We have followed published methodological guidance in planning our methods for conducting this scoping review, and we will additionally perform independent double data extraction to enhance the robustness of our findings where consistency of extraction is <90%.
- The search date will be limited to the last 5 years to retrieve useful, up-to-date reviews of alternative delivery arrangements relevant to high-income countries.
- Limiting the search date to the last 5 years means it is possible that we may not capture delivery arrangements included in out-of-date systematic reviews (published prior to 2012).
- Systematic reviews that are awaiting classification in 'Pretty Darn Quick'-Evidence will not be assessed as part of this review.

treatments,<sup>3</sup> medicalisation of risk factors and active screening of people who are well,<sup>4 5</sup> lowering of diagnostic and intervention thresholds for high prevalence conditions<sup>6-8</sup> and changing community expectations.<sup>9 10</sup> In addition, high-income countries are experiencing increasing inflationary pressures and workforce shortages.<sup>11-15</sup> In order to be sustainable, health systems and providers must be able to endure and adapt to these growing pressures by delivering services that maintain a high quality of care while providing better value for money.<sup>16</sup> In practice, this means health systems and providers need to consider the effectiveness and economic impact of existing service models, and also determine if there are alternative

models that might lead to improved efficiencies without compromising the quality of care and patient outcomes.

There are examples of models of service delivery that have been adopted in practice that offer modest benefits for patients when compared with usual care, but where the economic impact is uncertain (eg, early discharge from hospital and care at home),<sup>17</sup> or not known (eg, mid-wife led models of care).<sup>18</sup> In addition, some alternative delivery arrangements have been implemented despite uncertainty about effects on patient care and economic impact (eg, primary care physicians providing care in emergency departments)<sup>19</sup> and, in some cases, effectiveness is later shown to be low and associated costs, high (eg, rapid exchange of operating room air to reduce infection rates).<sup>20</sup> For this reason, efforts that aim to manage expenditure need to focus not just on benefits to patients, but on the value of the delivery arrangement relative to the cost. This distinction is important, as high-cost models of care may still be good value if they deliver high levels of benefit to patients, while low-cost models of care may have no value if they provide little or no benefit.<sup>21</sup> In 2017, the Australian Productivity Commission released a report identifying that there are considerable efficiencies to be gained through identifying enablers and barriers to more efficient models of care, and that eliminating financial reward for delivery of services where there is clear evidence of a lack of efficacy or cost effectiveness, or where the benefits do not justify the associated costs should be part of future health planning.<sup>22</sup>

Alternative models of service delivery offer an opportunity for healthcare providers to deliver healthcare services in different and potentially more cost-effective ways through lower cost- providers, locations and formats of delivery. Examples include changing the site of the service delivery from a more expensive to a less expensive option, providing care in a group setting rather than to individuals, substituting the care that is provided by a highly trained or specialised health worker to care provided by a less specialised or lay health worker, or using technology to deliver care (eg, telemedicine). Provision of services in this way may lead to the same, and in some cases better, outcomes for patients without compromising the quality of care. However, these alternative models may also increase costs, so they must undergo robust economic evaluations that not only take into account improvements in patient and carer outcomes, but also consider the benefit and costs to the health system as a whole.

A scoping review provides a rapid method of mapping key concepts within a research area and provides an overview of the main sources and types of evidence available.<sup>23</sup> It is most useful when the research question is complex or has not been reviewed comprehensively before. A number of reviews of alternative delivery models have been published in the past 5 years. Most reviews have focused on the delivery of a single test or treatment for a particular disease or condition,<sup>24 25</sup> or a single delivery arrangement-type such as chronic disease programmes,<sup>26</sup> multidisciplinary care or integrated care interventions.<sup>27</sup>

As such, these reviews do not adequately summarise the volume and scope of existing synthesised research on alternative delivery arrangements. A recent Cochrane overview has focused on delivery arrangements relevant to low-income countries.<sup>28</sup> However, low-income countries struggle with different health system demands, including a predominance of communicable diseases and resource constraints and limited access to new technologies and other resources. Therefore, the findings of this overview may be less applicable to high-income countries (for eg, it includes delivery arrangements for HIV/AIDS, malaria, childhood diarrhoea, pneumonia and vaccination and antenatal care).

To the best of our knowledge, no scoping review or overview of alternative delivery arrangements for health systems relevant to high-income countries has been conducted to date. This work is likely to be useful for decision makers by mapping the availability of existing synthesised evidence, including where economic analysis of alternative delivery arrangements exists and in highlighting gaps for future research. The proposed scoping review forms part of 5-year Partnership Centre for Health System Sustainability funded by the Australian National Health and Medical Research Council and other partners and aims to investigate and create interventions to improve health system performance sustainability.<sup>29</sup> This scoping review complements a systematic review by the Partnership Centre, currently under way, that will review the sustainability of interventions, improvement efforts and change strategies in the health system through an examination of trial data published in the last 5 years.<sup>16</sup>

## Objectives

This scoping review aims to describe the extent, range and nature of available systematic reviews of alternative delivery arrangements for health systems relevant to high-income countries published in the last 5 years. A time-frame of 5 years was chosen to ensure that the review contained evidence and data about effects that are up-to-date, reliable and ready to implement. A secondary aim is to identify gaps in the availability of up-to-date systematic reviews of alternative delivery arrangements needed to inform health system sustainability initiatives and future research directions.

## METHODS AND ANALYSIS

### Protocol development

The protocol for this scoping review is underpinned by the methodological framework first suggested by Arksey and O'Malley,<sup>30</sup> and further described by Levac and colleagues.<sup>31</sup> This framework emphasises transparency of the protocol development and scoping review process to increase the reliability of the findings.

### Criteria for considering studies for this review

We will include all English language systematic reviews examining the effects of alternative delivery arrangements

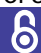

for health systems relevant to high-income countries published between 1 January 2012 and 20 September 2017. Alternative delivery arrangements include changes to how and when care is delivered, where care is provided and changes to the healthcare environment, who provides care and how the workforce is managed, co-ordination of care and management of care processes and information and communication technology systems.

For inclusion, systematic reviews must assess the effects of alternative delivery arrangements of relevance to high-income countries (as classified by the World Bank for the 2017 fiscal year),<sup>32</sup> have a methods section with explicit inclusion criteria, and report at least one of the following outcomes: patient outcomes (health and health behaviours), quality of care, access and/or utilisation of healthcare services, resource use, impacts on equity and/or social outcomes, healthcare provider outcomes and adverse effects. We will consider for inclusion systematic reviews in any setting, including hospital (inpatient or outpatient care, acute or subacute), primary care, long-term care facilities and the community.

### Search methods for identifying studies

We will search the 'Pretty Darn Quick' (PDQ)-Evidence for systematic reviews published between 1 January 2012 and 20 September 2017. PDQ-Evidence is a database of evidence for decisions about health systems derived from the Epistemonikos database of systematic reviews. It includes the following databases: Cochrane Database of Systematic Reviews, Database of Abstracts of Reviews of Effectiveness, MEDLINE via PubMed, EMBASE, CINAHL, PsycINFO, Latin American and Caribbean Health Sciences Literature, Joanna Briggs Institute Database of Systematic Reviews and Implementation Reports, Evidence for Policy and Practice Information and Co-ordinating Centre Evidence Library and the Campbell Collaboration online library. The 'intervention' publication filter will be used to exclude systematic reviews of non-intervention studies. An example of the search method has been provided as an online supplementary file.

### Study selection

Two review authors will independently screen the titles and abstracts retrieved by the search for inclusion and code as 'retrieve' (potentially eligible or unclear) or 'do not retrieve' (ineligible). We will retrieve the full text reports of potentially eligible and unclear titles and abstracts. Two (of a team of four) review authors will independently screen the full text reports and identify systematic reviews for inclusion and exclusion. We will record the reasons for exclusion of ineligible systematic reviews. We will resolve disagreements regarding eligibility through discussion, and if consensus is not achieved, by involving a third review author. We will prepare a Preferred Reporting Items for Systematic Reviews and Meta-Analyses flow chart summarising the search and selection process and the number of articles reviewed at each stage.

### Data extraction and management

We will extract descriptive data on systematic review characteristics (year, authors, journal, number and design of included studies), delivery arrangement category and subcategory, target population, setting and target health issue/s. Outcome categories and the main effects searched for by systematic review authors will also be collected (patient outcomes, quality of care, access and/or utilisation of healthcare services, resource use, impacts on equity and/or social outcomes, healthcare provider outcomes, adverse effects and economic analysis, where reported). The research team will develop, pilot and refine a data extraction form<sup>31</sup> (preliminary version of the data extraction form is presented in [table 1](#)).

As we anticipate a large volume of included studies, four review authors will be involved in the data extraction process. Initially, all four will independently extract data and populate the data extraction form for 10 systematic reviews and discrepancies will be discussed to ensure the process for extraction is consistent. The remaining systematic reviews will then be divided between reviewers. While independent data extraction of included studies by two review authors is not routinely recommended in method guidance for scoping reviews,<sup>31</sup> we will have a second reviewer allocated to extract a random sample of one third of included systematic reviews to assess the level of consistency and determine the accuracy of our process. Any disagreement between reviewer extraction processes will be resolved through discussion until consensus is reached. If the mean agreement in data extraction across this subset of systematic reviews is >90%, no further checks will be conducted. The data extraction process is illustrated in [figure 1](#).

### Collating and summarising results

We will categorise the delivery arrangements according to the Cochrane Effective Practice and Organisation of Care (EPOC) taxonomy of health system interventions.<sup>33</sup> This taxonomy is useful for organising and characterising health system interventions according to conceptual, functional and/or practical similarities. The delivery arrangement domain of the taxonomy classifies interventions based on changes to the following:

- ▶ How and when care is delivered.
- ▶ Where care is provided and changes to the healthcare environment.
- ▶ Who provides care and how the healthcare workforce is managed.
- ▶ Co-ordination of care and management of care processes and
- ▶ Information and communication technology systems.

In addition, we will use a category titled 'multiple (goal-focused)' to categorise systematic reviews that include all relevant delivery arrangements from across the above categories to address a specific problem or goal (eg, interventions for enhancing medication adherence).

We will summarise our findings quantitatively by presenting a numerical count of reviews in each category



**Table 1** Preliminary version of the data extraction form

| Study ID | Author, year | Brief description of intervention /objective | Place published | EPOC Delivery arrangement strategy | Sub-category | Number and type of trials included | Target population | Setting | Target health issue/s | Patient outcomes (health and health behaviours for example, mortality, cure rates) | Quality of care (systems or processes for improving quality of care for example, timeout before surgery) | Resource use | Impacts on equity | Social outcomes (eg, poverty, unemployment) | Access, utilisation (eg, re-admission rates, length of stay) | Healthcare provider outcomes (eg, overall well-being, fatigue, stress, satisfaction) | Economic analyses | Adverse effects |
|----------|--------------|----------------------------------------------|-----------------|------------------------------------|--------------|------------------------------------|-------------------|---------|-----------------------|------------------------------------------------------------------------------------|----------------------------------------------------------------------------------------------------------|--------------|-------------------|---------------------------------------------|--------------------------------------------------------------|--------------------------------------------------------------------------------------|-------------------|-----------------|
| ID1      |              |                                              |                 |                                    |              |                                    |                   |         |                       |                                                                                    |                                                                                                          |              |                   |                                             |                                                              |                                                                                      |                   |                 |
| ID2      |              |                                              |                 |                                    |              |                                    |                   |         |                       |                                                                                    |                                                                                                          |              |                   |                                             |                                                              |                                                                                      |                   |                 |
| ID3      |              |                                              |                 |                                    |              |                                    |                   |         |                       |                                                                                    |                                                                                                          |              |                   |                                             |                                                              |                                                                                      |                   |                 |

EPOC, Effective Practice and Organisation of Care.

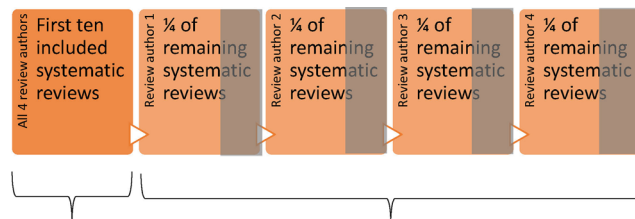

All four authors will independently extract data from the first 10 studies, compare results modify tool as required

1/3 of systematic reviews (indicated by grey shadow) will be extracted by two review authors. If >90% agreement is reached, no further checks of data extraction process will be completed.

**Figure 1** Data extraction process for included systematic reviews. All four authors will extract data from the first 10 systematic reviews. The remaining systematic reviews will be divided between the four review authors, and each author will have 1/3 of his/her studies reviewed by a second author to assess the level of agreement. If >90% agreement is reached, no further checks of data extraction process will be completed.

and visually using bubble charts to represent the quantity and range of systematic reviews across the delivery arrangement categories and to highlight gaps in the available synthesised evidence. Bubble charts allow the reader to see an overview of the spread of data across and within EPOC categories.<sup>34</sup> We will also describe the extent, range and nature of available systematic reviews using a narrative synthesis. This process will allow for identification of gaps in the availability of up-to-date systematic reviews and areas of delivery arrangements where the evidence is limited. Specifically, results will be used to (1) quantify the extent, range and nature of delivery strategies reported in systematic reviews, (2) quantify the number of systematic reviews where an economic analysis of the arrangement was reported and (3) determine the gaps and suggest delivery arrangements where future systematic reviews might be of use.

**Patient and public involvement**

The Consumers Health Forum of Australia, a representative advocate body for consumers in healthcare, have had oversight in the development and design of the protocol for this scoping review. Specifically, two members of the forum participated in stakeholder workshops during the design of the scoping review. The results will be disseminated among all stakeholders of the Partnership Grant, including consumer representatives.

**CONCLUSION**

This scoping review will describe the volume and scope of available up-to-date systematic reviews of alternative delivery arrangements relevant to high-income countries, and identify gaps in the synthesised evidence, needed to inform health system planning, health system sustainability initiatives and future research directions.

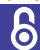

## ETHICS AND DISSEMINATION

As no primary data will be collected, ethical approval is not required. The study findings will be disseminated via reports, manuscript in a peer-reviewed journal and via conference presentations.

### Author affiliations

<sup>1</sup>Monash Department of Clinical Epidemiology, Cabrini Institute, Monash University, Malvern, Victoria, Australia

<sup>2</sup>Department of Epidemiology and Preventive Medicine, School of Public Health and Preventive Medicine, Monash University, Melbourne, Victoria, Australia

<sup>3</sup>Department of Allied Health, Northern Health, Melbourne, Victoria, Australia

<sup>4</sup>Nuffield Department of Population Health, University of Oxford, Oxford, UK

**Contributors** The study conception and overall design was conceived by RB and DAO. RLJ, DAO and PP designed the data extraction tool and RLJ, PP, KR and JN all assisted in piloting. RLJ wrote the first draft of this protocol and RB, DAO, PP, KR, JN, SC and SS critically reviewed the manuscript, contributed improvements and approved the final version.

**Funding** This work was supported by an NHMRC Partnership Centre for Health System Sustainability (Grant ID: 9100002). Along with the NHMRC, the funding partners in this research collaboration are: BUPA Health Foundation; NSW Health; Department of Health, Western Australia; and The University of Notre Dame Australia. RB is funded by an NHMRC Senior Principal Research Fellowship (#APP1082138).

**Competing interests** None declared.

**Patient consent** Not required.

**Provenance and peer review** Not commissioned; externally peer reviewed.

**Open access** This is an open access article distributed in accordance with the Creative Commons Attribution Non Commercial (CC BY-NC 4.0) license, which permits others to distribute, remix, adapt, build upon this work non-commercially, and license their derivative works on different terms, provided the original work is properly cited, appropriate credit is given, any changes made indicated, and the use is non-commercial. See: <http://creativecommons.org/licenses/by-nc/4.0/>.

## REFERENCES

- Walker A. National Centre for Social and Economic Modelling, University of Canberra. *Australia's ageing population*. Canberra: National Centre for Social and Economic Modelling, University of Canberra, 1998.
- Healey J. *Ageing*. Thirroul: Spinney Press, 2008.
- Pathirana T, Clark J, Moynihan R. Mapping the drivers of overdiagnosis to potential solutions. *BMJ* 2017;358:j3879.
- Moynihan R, Heath I, Henry D. Selling sickness: the pharmaceutical industry and disease mongering \* Commentary: Medicalisation of risk factors. *BMJ* 2002;324:886–91.
- Glasziou P, Moynihan R, Richards T, et al. Too much medicine; too little care. *BMJ* 2013;347:f4247.
- Hansen TW, Kikuya M, Thijs L, et al. Diagnostic thresholds for ambulatory blood pressure moving lower: a review based on a meta-analysis-clinical implications. *J Clin Hypertens* 2008;10:377–81.
- Mills NL, Lee KK, McAllister DA, et al. Implications of lowering threshold of plasma troponin concentration in diagnosis of myocardial infarction: cohort study. *BMJ* 2012;344:e1533.
- Forouhi NG, Balkau B, Borch-Johnsen K, et al. The threshold for diagnosing impaired fasting glucose: a position statement by the European Diabetes Epidemiology Group. *Diabetologia* 2006;49:822–7.
- Hill S, Wiley I. *The knowledgeable patient: communication and participation in health*. Hoboken, NJ: Wiley-Blackwell, 2011.
- Health participation: achieving greater public participation and accountability in the Australian health care system*. Melbourne: National Health Strategy, 1993.
- Gordon B. Solving the workforce shortage. *Health Progress* 2003;84:59.
- Del Mar C. New investments in primary care in Australia. *BMC Health Serv Res* 2011;11:39.
- Brooks PM, Robinson L, Ellis N. Options for expanding the health workforce. *Aust Health Rev* 2008;32:156–60.
- Buchan JM, Naccarella L, Brooks PM. Is health workforce sustainability in Australia and New Zealand a realistic policy goal? *Aust Health Rev* 2011;35:152–5.
- Australia's health workforce productivity commission research report*. Canberra: Productivity Commission, 2005.
- Braithwaite J, Testa L, Lamprell G, et al. Built to last? The sustainability of health system improvements, interventions and change strategies: a study protocol for a systematic review. *BMJ Open* 2017;7:e018568.
- Gonçalves-Bradley DC, Iliffe S, Doll HA, et al. Early discharge hospital at home. *The Cochrane Library* 2017.
- Sandall J, Soltani H, Gates S, et al. Midwife-led continuity models versus other models of care for childbearing women. *Cochrane Database Syst Rev* 2016;4:CD004667.
- Khangura JK, Flodgren G, Perera R, et al. Primary care professionals providing non-urgent care in hospital emergency departments. *The Cochrane Library* 2012.
- Hooper GJ, Rothwell AG, Frampton C, et al. Does the use of laminar flow and space suits reduce early deep infection after total hip and knee replacement?: the ten-year results of the New Zealand Joint Registry. *J Bone Joint Surg Br* 2011;93:85–90.
- Owens DK, Qaseem A, Chou R, et al. High-value, cost-conscious health care: concepts for clinicians to evaluate the benefits, harms, and costs of medical interventions. *Ann Intern Med* 2011;154:174–80.
- Australian Government Productivity Commission. *Shifting the dial: 5 year productivity review - Inquiry report*. Canberra: Australian Government Productivity Commission, 2017.
- Dijkers M. What is a scoping review. *KT Update* 2015;4:1–4.
- Zammarchi L, Casadei G, Strohmeier M, et al. A scoping review of cost-effectiveness of screening and treatment for latent tuberculosis infection in migrants from high-incidence countries. *BMC Health Serv Res* 2015;15:412.
- Boydell KM, Hodgins M, Pignatiello A, et al. Using technology to deliver mental health services to children and youth: a scoping review. *J Can Acad Child Adolesc Psychiatry* 2014;23:87.
- Hisashige A. The effectiveness and efficiency of disease management programs for patients with chronic diseases. *Global journal of health science* 2013;5:27.
- Damery S, Flanagan S, Combes G. Does integrated care reduce hospital activity for patients with chronic diseases? An umbrella review of systematic reviews. *BMJ Open* 2016;6:e011952.
- Ciapponi A, Lewin S, Herrera CA, et al. Delivery arrangements for health systems in low-income countries: an overview of systematic reviews. *Cochrane Database Syst Rev* 2017;32.
- Macquarie University. NHMRC partnership centre for health system sustainability. 2018. <http://aihi.mq.edu.au/project/nhmrc-partnership-centre-health-system-sustainability> (Accessed Sep 2018).
- Arksey H, O'Malley L. Scoping studies: towards a methodological framework. *Int J Soc Res Methodol* 2005;8:19–32.
- Levac D, Colquhoun H, O'Brien KK. Scoping studies: advancing the methodology. *Implement Sci* 2010;5:69.
- World Bank. World bank country and lending groups. <https://datahelpdesk.worldbank.org/knowledgebase/articles/906519-world-bank-country-and-lending-groups2017> (Accessed September 2017).
- Effective Practice and Organisation of Care (EPOC). EPOC taxonomy 2015. 2015. <https://epoc.cochrane.org/epoc-taxonomy> (Accessed Sep 2018).
- Robbins NB. *Creating more effective graphs*: Wiley, 2012.

## Supplementary file 2

| Delivery arrangement by EPOC Taxonomy category and subcategory          | EPOC Definition                                                                                                                                                            | No of SRs | Intervention details                                                                                                                                                                                                                                                                                                                                                                                                                                                                                                                                                                                                                                                                                                                                                                                                                                                                                                                                                                                                                                                                                                                                                                                                                                                                                                                                                                                                                                                                              |
|-------------------------------------------------------------------------|----------------------------------------------------------------------------------------------------------------------------------------------------------------------------|-----------|---------------------------------------------------------------------------------------------------------------------------------------------------------------------------------------------------------------------------------------------------------------------------------------------------------------------------------------------------------------------------------------------------------------------------------------------------------------------------------------------------------------------------------------------------------------------------------------------------------------------------------------------------------------------------------------------------------------------------------------------------------------------------------------------------------------------------------------------------------------------------------------------------------------------------------------------------------------------------------------------------------------------------------------------------------------------------------------------------------------------------------------------------------------------------------------------------------------------------------------------------------------------------------------------------------------------------------------------------------------------------------------------------------------------------------------------------------------------------------------------------|
| How and when care is delivered (n= 47)                                  |                                                                                                                                                                            |           |                                                                                                                                                                                                                                                                                                                                                                                                                                                                                                                                                                                                                                                                                                                                                                                                                                                                                                                                                                                                                                                                                                                                                                                                                                                                                                                                                                                                                                                                                                   |
| Queuing strategies                                                      | A reduction or increase in time to access a healthcare intervention, for example managed waiting lists, managing ER wait time.                                             | 7         | <ul style="list-style-type: none"> <li>- ED visit reduction programs (1, 2)</li> <li>- Improving patient flow and quality of care in the ED (3, 4)</li> <li>- Interventions to reduce waiting times for elective surgical procedures (5)</li> <li>- Patient initiated clinics for patients with chronic or recurrent conditions managed in secondary care (6, 7)</li> </ul>                                                                                                                                                                                                                                                                                                                                                                                                                                                                                                                                                                                                                                                                                                                                                                                                                                                                                                                                                                                                                                                                                                                       |
| Group versus individual care                                            | Providing care to groups versus individual patients                                                                                                                        | 5         | <ul style="list-style-type: none"> <li>- Group clinics (chronic conditions, antenatal care) (8-12)</li> </ul>                                                                                                                                                                                                                                                                                                                                                                                                                                                                                                                                                                                                                                                                                                                                                                                                                                                                                                                                                                                                                                                                                                                                                                                                                                                                                                                                                                                     |
| Quality and Safety                                                      | Essential standards for quality of healthcare, and reduction of poor outcomes related to unsafe healthcare                                                                 | 33        | <ul style="list-style-type: none"> <li>- Immediate versus deferred delivery of the preterm baby with suspected foetal compromise for improving outcomes (13)</li> <li>- Implementation of guidelines and evidence-based (14, 15)</li> <li>- Integrated care models (chronic diseases, specifically CVD, diabetes type 2, cancer, childhood obesity, haemophilia, mental health, multi-morbidities, chronic viral hepatitis) (16)</li> <li>- Interventions to increase breastfeeding (17)</li> <li>- Medication reconciliation interventions at hospital (18)</li> <li>- Patient safety interventions (in dentistry, acute care, ED; using safety check list, interventions to reduce wrong-site surgery, involvement in National Surgical Quality Improvement Program, incidence and error reporting at ICU, use of patient portals and EMR to improve safety of surgical procedures and medication prescription) (19-24)</li> <li>- Promoting hand hygiene (25)</li> <li>- Promoting use of guidelines and evidence-based medicine (26-29)</li> <li>- Reducing disparities in health and health care (30)</li> <li>- Reducing exposure to ionizing radiation from medical imaging (31)</li> <li>- Reducing medication and over-prescription (antibiotic use, opioid prescription, administration errors in children and adults, inappropriate prescribing in elderly) (32-44)</li> <li>- Using interpreters for non-English speakers on the delivery of palliative care (cancer) (45)</li> </ul> |
| Triage                                                                  | Management of patients attending a healthcare facility, or contacting a healthcare professional by phone, and receiving advice or being referral to an appropriate service | 2         | <ul style="list-style-type: none"> <li>- Improving patient flow and quality of care in the ED (46)</li> <li>- Pharmacist involvement in care for patients with chronic disease (heart failure and acute coronary syndrome, chronic kidney disease, HIV, cancer, mental disease), lifestyle changes (immunization, obesity, alcohol, smoking) (47)</li> </ul>                                                                                                                                                                                                                                                                                                                                                                                                                                                                                                                                                                                                                                                                                                                                                                                                                                                                                                                                                                                                                                                                                                                                      |
| Where care is provided and changes to the healthcare environment (n=55) |                                                                                                                                                                            |           |                                                                                                                                                                                                                                                                                                                                                                                                                                                                                                                                                                                                                                                                                                                                                                                                                                                                                                                                                                                                                                                                                                                                                                                                                                                                                                                                                                                                                                                                                                   |
| Environment                                                             | Changes to the physical or sensory healthcare environment                                                                                                                  | 1         | Interventions to increase breastfeeding uptake (48)                                                                                                                                                                                                                                                                                                                                                                                                                                                                                                                                                                                                                                                                                                                                                                                                                                                                                                                                                                                                                                                                                                                                                                                                                                                                                                                                                                                                                                               |
| Outreach services                                                       | Visits by health workers to different locations, for example involving specialists, generalists, mobile units                                                              | 1         | Mobile clinical for women's and children's health (49)                                                                                                                                                                                                                                                                                                                                                                                                                                                                                                                                                                                                                                                                                                                                                                                                                                                                                                                                                                                                                                                                                                                                                                                                                                                                                                                                                                                                                                            |
| Site of service                                                         | Changes in where care is provided, for example home vs.                                                                                                                    | 51        | <ul style="list-style-type: none"> <li>- Alternatives to hospitalisations: outpatient management, quick diagnostic units, hospital-at-home, observation units (for induction of</li> </ul>                                                                                                                                                                                                                                                                                                                                                                                                                                                                                                                                                                                                                                                                                                                                                                                                                                                                                                                                                                                                                                                                                                                                                                                                                                                                                                        |

|                                                                                                                                        |                                 |                                                                                                                                             |    |                                                                                                                                                                                                                                                                                                                                                                                                                                                                                                                                                                                                                                                                                                                                                                                                                                                                                                                                                                                                                                                                                                                                                                                                                                                                                                                                                                                                                                                                                        |
|----------------------------------------------------------------------------------------------------------------------------------------|---------------------------------|---------------------------------------------------------------------------------------------------------------------------------------------|----|----------------------------------------------------------------------------------------------------------------------------------------------------------------------------------------------------------------------------------------------------------------------------------------------------------------------------------------------------------------------------------------------------------------------------------------------------------------------------------------------------------------------------------------------------------------------------------------------------------------------------------------------------------------------------------------------------------------------------------------------------------------------------------------------------------------------------------------------------------------------------------------------------------------------------------------------------------------------------------------------------------------------------------------------------------------------------------------------------------------------------------------------------------------------------------------------------------------------------------------------------------------------------------------------------------------------------------------------------------------------------------------------------------------------------------------------------------------------------------------|
| 1<br>2<br>3<br>4<br>5<br>6<br>7<br>8<br>9<br>10<br>11<br>12<br>13<br>14<br>15<br>16<br>17<br>18                                        | delivery                        | healthcare facility, inpatient vs outpatient, specialized vs. non-specialized facility, walk in clinics, medical day hospital, mobile units |    | <p>labour, intravenous antibiotic therapy for cystic fibrosis, cardiac arrest, kidney dialysis, COPD, psychosis, paediatric care) (50-78)</p> <ul style="list-style-type: none"> <li>- ED based interventions (for managing alcohol misuse, domestic violence, palliative care) (79-81)</li> <li>- Home visiting (for pregnancy, child health and maltreatment, social determinants of health, partner violence) (82-87)</li> <li>- Home based prevention and rehabilitation (88-92)</li> <li>- Integrated care models (for chronic diseases, specifically CVD, diabetes type 2, cancer, childhood obesity, haemophilia, mental health, multi-morbidities, chronic viral hepatitis) (93)</li> <li>- Pre-hospital intervention in sepsis (94)</li> <li>- Reaching youth with out-of-facility services (HIV and reproductive health) (95)</li> <li>- School-based health centres for mental health, social determinants of health (96, 97)</li> <li>- Therapeutic communities for mental health (98, 99)</li> <li>- Waiting room based intervention to prevent STD (100)</li> </ul>                                                                                                                                                                                                                                                                                                                                                                                                      |
| 19<br>20<br>21<br>22                                                                                                                   | Size of organizations           | Increasing or decreasing the size of health service provider units                                                                          | 1  | <ul style="list-style-type: none"> <li>- Centralisation, specialisation and increasing volume of services to promote quality (e.g. cancer care and surgery) (101)</li> </ul>                                                                                                                                                                                                                                                                                                                                                                                                                                                                                                                                                                                                                                                                                                                                                                                                                                                                                                                                                                                                                                                                                                                                                                                                                                                                                                           |
| 23<br>24<br>25                                                                                                                         | Transportation services         | Arrangements for transporting patients from one site to another                                                                             | 1  | <ul style="list-style-type: none"> <li>- Helicopter emergency medical services for adults with major trauma (102)</li> </ul>                                                                                                                                                                                                                                                                                                                                                                                                                                                                                                                                                                                                                                                                                                                                                                                                                                                                                                                                                                                                                                                                                                                                                                                                                                                                                                                                                           |
| Who provides care and how the healthcare workforce is managed (n= 80)                                                                  |                                 |                                                                                                                                             |    |                                                                                                                                                                                                                                                                                                                                                                                                                                                                                                                                                                                                                                                                                                                                                                                                                                                                                                                                                                                                                                                                                                                                                                                                                                                                                                                                                                                                                                                                                        |
| 26<br>27<br>28<br>29<br>30<br>31<br>32<br>33<br>34<br>35<br>36<br>37<br>38<br>39<br>40<br>41<br>42<br>43<br>44<br>45<br>46<br>47<br>48 | Role expansion or task shifting | Expanding tasks undertaken by a cadre of health workers or shifting tasks from one cadre to                                                 | 65 | <ul style="list-style-type: none"> <li>- Advanced practice nursing in older people and in long-term care (103, 104)</li> <li>- Advanced trauma life support training for hospital health professional and ambulance crews (105, 106)</li> <li>- Carer involvement in cognition-based interventions for people with dementia (107)</li> <li>- Community-based health worker interventions (e.g. to improve chronic disease management, care among vulnerable population, preventing adolescent pregnancies, management of urgent, low-acuity illnesses and injuries) (108-110)</li> <li>- Interventions to increase breastfeeding (111)</li> <li>- Nurse-physician substitution (preoperative assessment and anaesthesia for elective surgical patients, care and early Dis plan in chronic diseases, prescribing, endoscopy, patient navigation, managing anxiety, patient education, abortion and maternity care, dental care) (112-136)</li> <li>- Peer-led interventions (e.g. mental health, adolescent lifestyles, paediatric chronic diseases) (137-141)</li> <li>- Pharmacist involvement in care for patients with chronic disease (heart failure and acute coronary syndrome, chronic kidney disease, HIV, cancer, mental disease), lifestyle changes (immunization, obesity, alcohol, smoking) (142-164)</li> <li>- Primary care-led provision of care (e.g. non-urgent care in ED, end-of-life care) (165, 166)</li> <li>- Radiographers in advanced roles (167)</li> </ul> |
| 49<br>50<br>51<br>52<br>53<br>54<br>55<br>56<br>57                                                                                     | Self-management                 | Shifting the provision of care to patients or their families                                                                                | 15 | <ul style="list-style-type: none"> <li>- Patient navigation (breast cancer) (168)</li> <li>- Promoting self-management (e.g. chronic diseases, specifically HIV, diabetes foot care, COPD, asthma, children with epilepsy, anxiety, MS, IBS; self-administration of medication in the hospital, oral anticoagulation, home uterine monitoring for detecting preterm labour) (169-181)</li> <li>- Reducing medication and over-prescription (antibiotic use, opioid prescription, administration errors in children and adults, inappropriate prescribing in elderly) (182)</li> </ul>                                                                                                                                                                                                                                                                                                                                                                                                                                                                                                                                                                                                                                                                                                                                                                                                                                                                                                  |
| Co-ordination of care and management of care processes (n=122)                                                                         |                                 |                                                                                                                                             |    |                                                                                                                                                                                                                                                                                                                                                                                                                                                                                                                                                                                                                                                                                                                                                                                                                                                                                                                                                                                                                                                                                                                                                                                                                                                                                                                                                                                                                                                                                        |
| 58<br>59<br>60                                                                                                                         | Integrated healthcare systems   | Bringing together delivery, management and organisation of services related to diagnosis,                                                   | 16 | <ul style="list-style-type: none"> <li>- Integrated care models (e.g. chronic diseases, specifically CVD, diabetes type 2, cancer, childhood obesity, haemophilia, mental health, multi-morbidities, chronic viral hepatitis) (183-198)</li> </ul>                                                                                                                                                                                                                                                                                                                                                                                                                                                                                                                                                                                                                                                                                                                                                                                                                                                                                                                                                                                                                                                                                                                                                                                                                                     |



|                                 |                                                                                                                                                                                                                             |    |                                                                                                                                                                                                                                                                                                                                                                                                                                                                                                                                                                                                                                                                                                                                                                                                                                                                                                                                                                         |
|---------------------------------|-----------------------------------------------------------------------------------------------------------------------------------------------------------------------------------------------------------------------------|----|-------------------------------------------------------------------------------------------------------------------------------------------------------------------------------------------------------------------------------------------------------------------------------------------------------------------------------------------------------------------------------------------------------------------------------------------------------------------------------------------------------------------------------------------------------------------------------------------------------------------------------------------------------------------------------------------------------------------------------------------------------------------------------------------------------------------------------------------------------------------------------------------------------------------------------------------------------------------------|
|                                 | treatment, care, rehabilitation and health promotion                                                                                                                                                                        |    |                                                                                                                                                                                                                                                                                                                                                                                                                                                                                                                                                                                                                                                                                                                                                                                                                                                                                                                                                                         |
| Shared decision making          | A collaborative process that allows patients and their providers to make health care <b>decisions</b> together, taking into account the best scientific evidence available, as well as the patient's values and preferences | 14 | <ul style="list-style-type: none"> <li>- Educational intervention for patients and carers (end-of-life care, paediatric care) (199, 200)</li> <li>- Improving healthcare professionals skills (e.g. communication in cancer, performance in nursing homes, recognition and management of deteriorating patients, genetic education) (201)</li> <li>- Promoting adoption of Shared Decision Making (202, 203)</li> <li>- Reducing medication and over prescription (antibiotic use, opioid prescription, administration errors in children and adults, inappropriate prescribing in elderly) (204)</li> <li>- Shared decision making in pregnancy and delivery, treatment in older people and cancer screening (205-212)</li> </ul>                                                                                                                                                                                                                                      |
| Packages of care                | Integrated packages of care such as the Integrated Management of Childhood Illness (IMCI)                                                                                                                                   | 1  | <ul style="list-style-type: none"> <li>- Care delivery models/disease management (e.g. in dementia and other mental health conditions, elderly inpatients, epilepsy, asthma, HIV, hearth failure, chronic cough in children, antenatal care) (213)</li> </ul>                                                                                                                                                                                                                                                                                                                                                                                                                                                                                                                                                                                                                                                                                                           |
| Case management                 | Use of individuals, often specially trained nurses, to coordinate care for patients with multiple or complex needs                                                                                                          | 14 | <ul style="list-style-type: none"> <li>- Advance care planning (e.g., haemodialysis patients, palliative care, end-of-life interventions) (214-217)</li> <li>- Integrated care models (e.g. chronic diseases, specifically CVD, diabetes type 2, cancer, childhood obesity, haemophilia, mental health, multi-morbidities, chronic viral hepatitis) (218)</li> <li>- Outpatient case management (e.g. complex care needs, dementia and other mental disorders, CVD) (219-227)</li> </ul>                                                                                                                                                                                                                                                                                                                                                                                                                                                                                |
| Disease management              | Programs designed to manage or prevent a chronic condition using a systematic approach to care and potentially employing multiple ways of influencing patients, providers or the process of care                            | 16 | <ul style="list-style-type: none"> <li>- Adolescent-specific prenatal interventions on improving attendance and reducing harm during and after birth (228)</li> <li>- Care delivery models/disease management (e.g. in dementia and other mental health conditions, elderly inpatients, epilepsy, asthma, HIV, hearth failure, chronic cough in children, antenatal care) (229-235)</li> <li>- Chronic Disease Management – asthma (236)</li> <li>- Improving healthcare professionals skills (e.g. communication in cancer, performance in nursing homes, recognition and management of deteriorating patients, genetic education) (237-242)</li> <li>- Outpatient management of cardio-metabolic risk factor control in people with diabetes (243)</li> </ul>                                                                                                                                                                                                         |
| Care pathways                   | Strategies to link evidence to practice for specific health conditions. These strategies detail the local structure, systems and time-frames to address recommendations                                                     | 8  | <ul style="list-style-type: none"> <li>- Advanced care planning (244)</li> <li>- Care delivery models/disease management (245)</li> <li>- Critical Care path (e.g. head and neck cancer surgery, after discharge from an ICU) (246, 247)</li> <li>- Interventions to improve linkage with or retention in HIV services (248-250)</li> <li>- Rapid response systems to reduce hospital mortality (251)</li> </ul>                                                                                                                                                                                                                                                                                                                                                                                                                                                                                                                                                        |
| Teams                           | Care provided by teams or interdisciplinary collaboration                                                                                                                                                                   | 22 | <ul style="list-style-type: none"> <li>- Care delivery models/disease management (e.g. in dementia and other mental health conditions, elderly inpatients, epilepsy, asthma, HIV, hearth failure, chronic cough in children, antenatal care) (252)</li> <li>- Integrated care models (e.g. chronic diseases, specifically CVD, diabetes type 2, cancer, childhood obesity, haemophilia, mental health, multi-morbidities, chronic viral hepatitis) (253)</li> <li>- Interventions to promote work participation in people with regional musculoskeletal pain (254)</li> <li>- Multidisciplinary team care (e.g. chronic care, specifically RA, mental illness and crisis resolution, chronic kidney disease; trauma in elderly, palliative care in cancer, acute care, secondary fracture prevention, geriatric care, rehabilitation, end of life care, paediatric feeding disorders) (255-272)</li> <li>- Multidisciplinary team care (neonatal care) (273)</li> </ul> |
| Communication between providers | Systems or strategies for communication between health care providers                                                                                                                                                       | 6  | <ul style="list-style-type: none"> <li>- Improving clinical communication in hospitals, between primary and secondary care (274-277)</li> <li>- Improving patient handovers from hospital to primary care and vice versa (278, 279)</li> </ul>                                                                                                                                                                                                                                                                                                                                                                                                                                                                                                                                                                                                                                                                                                                          |
| Transition of care              | Interventions to improve transition from one care                                                                                                                                                                           | 7  | <ul style="list-style-type: none"> <li>- Transition from paediatrics to adults care (e.g. diabetes, mental health, RMDs, special health care needs) (280-286)</li> </ul>                                                                                                                                                                                                                                                                                                                                                                                                                                                                                                                                                                                                                                                                                                                                                                                                |

|                                                         |                                                                                                                                                                                                   |     |                                                                                                                                                                                                                                                                                                                                                                                                                                                                                                                                                                                                                                                                                                                                                                                                                                                                                                                                                                                    |
|---------------------------------------------------------|---------------------------------------------------------------------------------------------------------------------------------------------------------------------------------------------------|-----|------------------------------------------------------------------------------------------------------------------------------------------------------------------------------------------------------------------------------------------------------------------------------------------------------------------------------------------------------------------------------------------------------------------------------------------------------------------------------------------------------------------------------------------------------------------------------------------------------------------------------------------------------------------------------------------------------------------------------------------------------------------------------------------------------------------------------------------------------------------------------------------------------------------------------------------------------------------------------------|
|                                                         | provider to another                                                                                                                                                                               |     |                                                                                                                                                                                                                                                                                                                                                                                                                                                                                                                                                                                                                                                                                                                                                                                                                                                                                                                                                                                    |
| Discharge planning                                      | Systems for planning the discharge of patients from facilities                                                                                                                                    | 18  | <ul style="list-style-type: none"> <li>- (Early) supported Dis plan (e.g. acute stroke, COPD, elderly patients, children with cancer and febrile neutropenia) (287-298)</li> <li>- Fast-track surgery programs (liver surgery) (299-301)</li> <li>- Providing written information to reduce re-admissions in heart failure (302)</li> <li>- Transitional care management after hospital discharge to reduce 30-days readmission rates (303, 304)</li> </ul>                                                                                                                                                                                                                                                                                                                                                                                                                                                                                                                        |
| <b>Information and communication technology (n=189)</b> |                                                                                                                                                                                                   |     |                                                                                                                                                                                                                                                                                                                                                                                                                                                                                                                                                                                                                                                                                                                                                                                                                                                                                                                                                                                    |
| Health information systems                              | Health record and health management systems to store and manage patient health information, for example electronic patient records, or systems for recalling patients for follow-up or prevention | 13  | <ul style="list-style-type: none"> <li>- Health notes vs EMR in pregnancy (305, 306)</li> <li>- Interventions to improve attendance of appointments (307-309)</li> <li>- Interventions to increase vaccine uptake (elderly, children) (310)</li> <li>- Paediatric track and trigger systems for hospitalised children (311)</li> <li>- Patient safety interventions (312)</li> <li>- Recall intervals (dental visits, women with history of gestational diabetes, TB appointments) (313-315)</li> <li>- Reminder interventions to improve treatment adherence (316)</li> <li>- The Use of Medical Scribes in Health Care Settings (317)</li> </ul>                                                                                                                                                                                                                                                                                                                                 |
| The use of information and communication technology     | Technology based methods to transfer healthcare information and support the delivery of care.                                                                                                     | 13  | <ul style="list-style-type: none"> <li>- Computerized clinical decision support to enable patient-centred care (nutrition informatics, advice on drug dosage) (318)</li> <li>- Medication organization devices (319-321)</li> <li>- Medication reconciliation interventions at hospital (322)</li> <li>- Multimedia educational interventions for consumers about prescribed and over-the-counter medications (323)</li> <li>- Patient portals (324, 325)</li> <li>- Reducing inappropriate imaging and testing (e.g. cardiac, low-back pain imaging, lab tests ordering by GPs) (326)</li> <li>- Reducing medication and over-prescription (antibiotic use, opioid prescription, administration errors in children and adults, inappropriate prescribing in elderly) (327)</li> <li>- Serious games for professional training and patient education (e.g. chronic diseases, mental health) (328, 329)</li> <li>- Telehealth (range of intervention types) (330)</li> </ul>        |
| Smart home technologies                                 | Electronic assistive technologies                                                                                                                                                                 | 1   | <ul style="list-style-type: none"> <li>- Remote monitoring (e.g. after recent hospital discharge with heart failure, in elderly, asthma) (331)</li> </ul>                                                                                                                                                                                                                                                                                                                                                                                                                                                                                                                                                                                                                                                                                                                                                                                                                          |
| Telemedicine                                            | Exchange of healthcare information from one site to another via electronic communication                                                                                                          | 162 | <ul style="list-style-type: none"> <li>- Self-care apps (332-352)</li> <li>- Social media (353)</li> <li>- Social networks (354-356)</li> <li>- Telecoaching (357-359)</li> <li>- Telecoaching (automated telephone messaging) (360-362)</li> <li>- Telecoaching (peer support programs) (363)</li> <li>- Telecoaching (telephone counselling) (364-373)</li> <li>- Telecoaching (web-based programs) (374-422)</li> <li>- Telehealth (423)</li> <li>- Telehealth (email communication) (424-426)</li> <li>- Telehealth (mobile phone messaging) (427-437)</li> <li>- Telehealth (mobile phone technology) (438, 439)</li> <li>- Telehealth (mobile phone) (440)</li> <li>- Telehealth (mobile technology) (441)</li> <li>- Telehealth (range of intervention types) (442-464)</li> <li>- Telehealth (telemonitoring)(465-473)</li> <li>- Telemedicine (474-486)</li> <li>- Telemedicine (screening) (487, 488)</li> <li>- Telemedicine (tele-rehabilitation) (489-493)</li> </ul> |
| <b>Goal-focused reviews (n=38)</b>                      |                                                                                                                                                                                                   |     |                                                                                                                                                                                                                                                                                                                                                                                                                                                                                                                                                                                                                                                                                                                                                                                                                                                                                                                                                                                    |
| Interventions to address social determinants of         |                                                                                                                                                                                                   | 14  | <ul style="list-style-type: none"> <li>- Culturally appropriate prevention and care (494-502)</li> <li>- Eliminating repeat unintended pregnancy in teenagers (503)</li> <li>- Improving access for homeless (504)</li> <li>- Interventions to address social determinants of health (505-507)</li> </ul>                                                                                                                                                                                                                                                                                                                                                                                                                                                                                                                                                                                                                                                                          |

|                                                               |  |     |                                                                                                                           |
|---------------------------------------------------------------|--|-----|---------------------------------------------------------------------------------------------------------------------------|
| health                                                        |  |     |                                                                                                                           |
| Improving medication adherence                                |  | 11  | - Improving medication adherence (e.g. chronic diseases, specifically diabetes, HIV, CVD; in ethnic minorities) (508-518) |
| Addressing multimorbidity in primary care                     |  | 1   | - Addressing multimorbidity in primary care (519)                                                                         |
| Preventing readmissions                                       |  | 1   | - Preventing 30-Day Hospital Readmissions (520)                                                                           |
| Reducing inappropriate imaging and testing                    |  | 3   | - Reducing inappropriate imaging and testing (e.g. cardiac, low-back pain imaging, lab tests ordering by GPs) (521-523)   |
| Meeting family needs of the critically ill                    |  | 1   | - Meeting family needs of critically ill patients in an ICU (524)                                                         |
| Communicating contraceptive effectiveness                     |  | 1   | - Communicating contraceptive effectiveness (525)                                                                         |
| Improving adherence to treatment                              |  | 2   | - Improving adherence to treatment (children with chronic diseases, adult heart transplant patients) (526, 527)           |
| Interventions to increase retention in mental health services |  | 1   | - Interventions to increase retention in mental health services (528)                                                     |
| Interventions to increase vaccine uptake (elderly, children)  |  | 3   | - Interventions to increase vaccine uptake (elderly, children) (529-531)                                                  |
| Total                                                         |  | 531 |                                                                                                                           |

## References

1. Moe J, Kirkland S, Rawe E, Ospina MB, Vandermeer B, Campbell S, et al. Effectiveness of Interventions to Decrease Emergency Department Visits by Adult Frequent Users: A systematic review. *Academic emergency medicine : official journal of the Society for Academic Emergency Medicine*. 2017;24(1):40-52.
2. Raven MC, Kushel M, Ko MJ, Penko J, Bindman AB. The Effectiveness of Emergency Department Visit Reduction Programs: A Systematic Review. *Annals of emergency medicine*. 2016;68(4):467-83.e15.
3. Elder E, Johnston AN, Crilly J. Review article: systematic review of three key strategies designed to improve patient flow through the emergency department. *Emerg Med Australas*. 2015;27(5):394-404.
4. van Galen LS, Lammers EM, Schoonmade LJ, Alam N, Kramer MH, Nanayakkara PW. Acute medical units: The way to go? A literature review. *Eur J Intern Med*. 2017;39:24-31.
5. Ballini L, Negro A, Maltoni S, Vignatelli L, Flodgren G, Simera I, et al. Interventions to reduce waiting times for elective procedures. *Cochrane Database Syst Rev*. 2015(2):CD005610.
6. Chen CE, Chen CT, Hu J, Mehrotra A. Walk-in clinics versus physician offices and emergency rooms for urgent care and chronic disease management. *Cochrane Database Syst Rev*. 2017;2:CD011774.
7. Whear R, Abdul-Rahman AK, Boddy K, Thompson-Coon J, Perry M, Stein K. The clinical effectiveness of patient initiated clinics for patients with chronic or recurrent conditions managed in secondary care: a systematic review. *PLoS One*. 2013;8(10):e74774.
8. Booth A, Cantrell A, Preston L, Chambers D, Goyder E. What is the evidence for the effectiveness, appropriateness and feasibility of group clinics for patients with chronic conditions? A systematic review 2015 2015/12/None.
9. Carter EB, Temming LA, Akin J, Fowler S, Macones GA, Colditz GA, et al. Group Prenatal Care Compared With Traditional Prenatal Care: A Systematic Review and Meta-analysis. *Obstet Gynecol*. 2016;128(3):551-61.
10. Catling CJ, Medley N, Foureux M, Ryan C, Leap N, Teate A, et al. Group versus conventional antenatal care for women. *Cochrane Database Syst Rev*. 2015(2):CD007622.
11. O'Keeffe M, Hayes A, McCreesh K, Purtill H, O'Sullivan K. Are group-based and individual physiotherapy exercise programmes equally effective for musculoskeletal conditions? A systematic review and meta-analysis. *Br J Sports Med*. 2017;51(2):126-32.
12. Quiñones AR, Richardson J, Freeman M, Fu R, O'Neil ME, Motu'apuaka M, et al. Educational group visits for the management of chronic health conditions: a systematic review. *Patient education and counseling*. 2014;95(1):3-29.
13. Stock SJ, Bricker L, Norman JE, West HM. Immediate versus deferred delivery of the preterm baby with suspected fetal compromise for improving outcomes. *Cochrane Database Syst Rev*. 2016;7:CD008968.
14. Forman-Hoffman VL, Middleton JC, McKeeman JL, Stambaugh LF, Christian RB, Gaynes BN, et al. Strategies To Improve Mental Health Care for Children and Adolescents 2016 2016/12/None.
15. Petit Dit Dariel O, Regnaud JP. Do Magnet®-accredited hospitals show improvements in nurse and patient outcomes compared to non-Magnet hospitals: a systematic review. *Journal of Clinical Nursing*. 2015;13(6):168-219.
16. Pasricha A, Deinstadt RT, Moher D, Killoran A, Rourke SB, Kendall CE. Chronic Care Model Decision Support and Clinical Information Systems interventions for people living with HIV: a systematic review. *J Gen Intern Med*. 2013;28(1):127-35.
17. Howe-Heyman A, Lutembacher M. The Baby-Friendly Hospital Initiative as an Intervention to Improve Breastfeeding Rates: A Review of the Literature. *Journal of midwifery & women's health*. 2016;61(1):77-102.
18. Christensen M, Lundh A. Medication review in hospitalised patients to reduce morbidity and mortality. *Cochrane Database Syst Rev*. 2016;2:CD008986.

19. Algie CM, Mahar RK, Wasiak J, Batty L, Gruen RL, Mahar PD. Interventions for reducing wrong-site surgery and invasive clinical procedures. *Cochrane Database Syst Rev.* 2015(3):CD009404.
20. Bailey E, Tickle M, Campbell S, O'Malley L. Systematic review of patient safety interventions in dentistry. *BMC oral health.* 2015;15(1):152.
21. Fudickar A, Horle K, Wiltfang J, Bein B. The effect of the WHO Surgical Safety Checklist on complication rate and communication. *Dtsch Arztebl Int.* 2012;109(42):695-701.
22. Lyons VE, Popejoy LL. Meta-analysis of surgical safety checklist effects on teamwork, communication, morbidity, mortality, and safety. *West J Nurs Res.* 2014;36(2):245-61.
23. Ojeleye O, Avery, A., Gupta, V. and Boyd, M. The evidence for the effectiveness of safety alerts in electronic patient medication record systems at the point of pharmacy order entry: a systematic review. *BMC medical informatics and decision making.* 2013.
24. Thomassen O, Storesund A, Softeland E, Brattebo G. The effects of safety checklists in medicine: a systematic review. *Acta Anaesthesiol Scand.* 2014;58(1):5-18.
25. Srigley JA, Furness CD, Gardam M. Interventions to improve patient hand hygiene: a systematic review. *J Hosp Infect.* 2016;94(1):23-9.
26. Blackwood B, Burns K.E.A, Cardwell C.R. and O'Halloran, P. Protocolized versus non-protocolized weaning for reducing the duration of mechanical ventilation in critically ill adult patients. *Cochrane Database of Systematic Reviews.* 2014.
27. Fiander M, McGowan, J., Grad, R., Pluye, P., Hannes, K., Labrecque, M., Roberts, N. W., Salzwedel, D. M., Welch, V. and Tugwell, P. Interventions to increase the use of electronic health information by healthcare practitioners to improve clinical practice and patient outcomes. *Cochrane Database of Systematic Reviews.* 2015.
28. Okelo SO, Butz AM, Sharma R, Diette GB, Pitts SI, King TM, et al. Interventions to Modify Health Care Provider Adherence to Asthma Guidelines 2013/05/None.
29. Omran D, Guirguis LM, Simpson SH. Systematic Review of Pharmacist Interventions to Improve Adherence to Oral Antidiabetic Medications in People with Type 2 Diabetes. *Canadian Journal of Diabetes.* 2012;36(5):292-9.
30. McPheeters ML, Kripalani S, Peterson NB, Idowu RT, Jerome RN, Potter SA, et al. Closing the quality gap: revisiting the state of the science (vol. 3: quality improvement interventions to address health disparities). *Evidence report/technology assessment.* 2012(208.3):1-475.
31. Thaker A, Navadeh S, Gonzales H, Malekinejad M. Effectiveness of Policies on Reducing Exposure to Ionizing Radiation From Medical Imaging: A Systematic Review. *J Am Coll Radiol.* 2015;12(12 Pt B):1434-45.
32. Alldred DP, Kennedy MC, Hughes C, Chen TF, Miller P. Interventions to optimise prescribing for older people in care homes. *Cochrane Database Syst Rev.* 2016;2:CD009095.
33. Bannan DF, Tully MP. Bundle interventions used to reduce prescribing and administration errors in hospitalized children: a systematic review. *J Clin Pharm Ther.* 2016;41(3):246-55.
34. Clyne B, Fitzgerald C, Quinlan A, Hardy C, Galvin R, Fahey T, et al. Interventions to Address Potentially Inappropriate Prescribing in Community-Dwelling Older Adults: A Systematic Review of Randomized Controlled Trials. *J Am Geriatr Soc.* 2016;64(6):1210-22.
35. Davey P, Marwick CA, Scott CL, Charani E, McNeil K, Brown E, et al. Interventions to improve antibiotic prescribing practices for hospital inpatients. *Cochrane Database Syst Rev.* 2017;2:CD003543.
36. Kaufmann J, Laschat M, Wappler F. Medication errors in pediatric emergencies: a systematic analysis. *Dtsch Arztebl Int.* 2012;109(38):609-16.
37. Keers RN, Williams SD, Cooke J, Walsh T, Ashcroft DM. Impact of interventions designed to reduce medication administration errors in hospitals: a systematic review. *Drug safety : an international journal of medical toxicology and drug experience.* 2014;37(5):317-32.
38. Maaskant JM, Vermeulen H, Apampa B, Fernando B, Ghaleb MA, Neubert A, et al. Interventions for reducing medication errors in children in hospital. *Cochrane Database Syst Rev.* 2015(3):CD006208.



- 1
- 2
- 3
- 4 39. Manias E, Williams A, Liew D. Interventions to reduce medication errors in adult intensive
- 5 care: a systematic review. *Br J Clin Pharmacol*. 2012;74(3):411-23.
- 6 40. Patterson SM, Cadogan CA, Kerse N, Cardwell CR, Bradley MC, Ryan C, et al. Interventions to
- 7 improve the appropriate use of polypharmacy for older people. *Cochrane Database Syst Rev*.
- 8 2014(10):CD008165.
- 9 41. Spurling GK, Del Mar CB, Dooley L, Foxlee R, Farley R. Delayed antibiotics for respiratory
- 10 infections. *Cochrane Database Syst Rev*. 2013(4):CD004417.
- 11 42. van der Velden AW, Pijpers, E. J., Kuyvenhoven, M. M., Tonkin-Crine, S. K., Little, P. and
- 12 Verheij, T. J. Effectiveness of physician-targeted interventions to improve antibiotic use for
- 13 respiratory tract infections. *The British journal of general practice : the journal of the Royal College*
- 14 *of General Practitioners*. 2012.
- 15 43. Windmill J, Fisher E, Eccleston C, Derry S, Stannard C, Knaggs R, et al. Interventions for the
- 16 reduction of prescribed opioid use in chronic non-cancer pain. *Cochrane Database Syst Rev*.
- 17 2013(9):CD010323.
- 18 44. Zhang YZaS, S. Antibiotic stewardship programmes in intensive care units: Why, how, and
- 19 where are they leading us. *World journal of critical care medicine*. 2015.
- 20 45. Silva MD, Genoff, M., Zaballa, A., Jewell, S., Stabler, S., Gany, F. M. and Diamond, L. C.
- 21 *Interpreting at the End of Life: A Systematic Review of the Impact of Interpreters on the Delivery of*
- 22 *Palliative Care Services to Cancer Patients with Limited English Proficiency*. *Journal of pain and*
- 23 *symptom management*. 2015.
- 24 46. Rowe BH, Guo X, Villa-Roel C, Schull M, Holroyd B, Bullard M, et al. The role of triage liaison
- 25 physicians on mitigating overcrowding in emergency departments: a systematic review. *Acad Emerg*
- 26 *Med*. 2012;18(2):111-20.
- 27 47. Curley LE, Moody J, Gobarani R, Aspden T, Jensen M, McDonald M, et al. Is there potential
- 28 for the future provision of triage services in community pharmacy? *Journal of pharmaceutical policy*
- 29 *and practice*. 2016.
- 30 48. Jaafar SH, Ho JJ, Lee KS. Rooming-in for new mother and infant versus separate care for
- 31 increasing the duration of breastfeeding. *Cochrane Database Syst Rev*. 2016(8):CD006641.
- 32 49. Abdel-Aleem H, El-Gibaly OM, El-Gazzar AF, Al-Attar GS. Mobile clinics for women's and
- 33 children's health. *Cochrane Database Syst Rev*. 2016(8):CD009677.
- 34 50. Arrich J, Holzer M, Havel C, Warenits AM, Herkner H. Pre-hospital versus in-hospital
- 35 initiation of cooling for survival and neuroprotection after out-of-hospital cardiac arrest. *Cochrane*
- 36 *Database Syst Rev*. 2016;3:CD010570.
- 37 51. Baishnab E, Karner C. Primary care based clinics for asthma. *Cochrane Database Syst Rev*.
- 38 2012(4):CD003533.
- 39 52. Balaguer A, Gonzalez de Dios J. Home versus hospital intravenous antibiotic therapy for
- 40 cystic fibrosis. *Cochrane Database Syst Rev*. 2015(12):CD001917.
- 41 53. Behan C, Masterson S, Clarke M. Systematic review of the evidence for service models
- 42 delivering early intervention in psychosis outside the stand-alone centre. *Early Interv Psychiatry*.
- 43 2017;11(1):3-13.
- 44 54. Brown L, Forster A, Young J, Crocker T, Benham A, Langhorne P, et al. Medical day hospital
- 45 care for older people versus alternative forms of care. *Cochrane Database Syst Rev*.
- 46 2015(6):CD001730.
- 47 55. Caplan GA, Sulaiman NS, Mangin DA, Aimonino Ricauda N, Wilson AD, Barclay L. A meta-
- 48 analysis of "hospital in the home". *The Medical journal of Australia*. 2012;197(9):512-9.
- 49 56. Hodnett ED, Downe, S., Walsh, D. Alternative versus conventional institutional settings for
- 50 birth. *Cochrane Database of Systematic Reviews*. 2012.
- 51 57. Ishani A, Slinin Y, Greer N, MacDonald R, Messana J, Rutks I, et al. Comparative Effectiveness
- 52 of Home-Based Kidney Dialysis Versus In-Center or Other Outpatient Kidney Dialysis Locations – A
- 53 Systematic Review 2015 2015/04/None.
- 54
- 55
- 56
- 57
- 58
- 59
- 60



- 1
- 2
- 3
- 4 58. Jeppesen E BK, Vist GE, Wedzicha JA, Wright JJ, Greenstone M, Walters JA. Hospital at home
- 5 for acute exacerbations of chronic obstructive pulmonary disease. *Cochrane Database of Systematic*
- 6 *Reviews*. 2012.
- 7 59. Kelly AJ, Alfirovic Z, Ghosh A. Outpatient versus inpatient induction of labour for improving
- 8 birth outcomes. *Cochrane Database Syst Rev*. 2013(11):CD007372.
- 9 60. Lawrence D, Fedorowicz Z, van Zuuren EJ. Day care versus in-patient surgery for age-related
- 10 cataract. *Cochrane Database Syst Rev*. 2015(11):Cd004242.
- 11 61. MacIntyre EJ, Asadi L, McKim DA, Bagshaw SM. Clinical Outcomes Associated with Home
- 12 Mechanical Ventilation: A Systematic Review. *Canadian respiratory journal*. 2016;2016(no
- 13 pagination):6547180.
- 14 62. Malwade US, Jardine LA. Home- versus hospital-based phototherapy for the treatment of
- 15 non-haemolytic jaundice in infants at more than 37 weeks' gestation. *Cochrane Database Syst Rev*.
- 16 2014(6):CD010212.
- 17 63. McCaul M, Lourens A, Kredt T. Pre-hospital versus in-hospital thrombolysis for ST-elevation
- 18 myocardial infarction. *Cochrane Database Syst Rev*. 2014(9):CD010191.
- 19 64. Neves LF, Reis MH, Goncalves TR. Home or community-based pulmonary rehabilitation for
- 20 individuals with chronic obstructive pulmonary disease: a systematic review and meta-analysis. *Cad*
- 21 *Saude Publica*. 2016;32(6).
- 22 65. Nordly M, Vadstrup ES, Sjøgren P, Kurita GP. Home-based specialized palliative care in
- 23 patients with advanced cancer: A systematic review. *Palliative & supportive care*. 2016;14(6):1-12.
- 24 66. Olsen O, Clausen JA. Planned hospital birth versus planned home birth. *Cochrane Database*
- 25 *Syst Rev*. 2012(9):CD000352.
- 26 67. Palmer SC, Palmer AR, Craig JC, Johnson DW, Stroumza P, Frantzen L, et al. Home versus in-
- 27 centre haemodialysis for end-stage kidney disease. *Cochrane Database Syst Rev*.
- 28 2014(11):Cd009535.
- 29 68. Parab CS, Cooper C, Woolfenden S, Piper SM. Specialist home-based nursing services for
- 30 children with acute and chronic illnesses. *Cochrane Database Syst Rev*. 2013(6):CD004383.
- 31 69. Parker G, Spiers G, Gridley K, Atkin K, Birks Y, Lawson K, et al. Systematic review of
- 32 international evidence on the effectiveness and costs of paediatric home care for children and young
- 33 people who are ill. *Child: care, health and development*. 2013;39(1):1-19.
- 34 70. Abou El Senoun G, Dowswell T, Mousa HA. Planned home versus hospital care for preterm
- 35 prelabour rupture of the membranes (PPROM) prior to 37 weeks' gestation. *Cochrane Database Syst*
- 36 *Rev*. 2014(4):CD008053.
- 37 71. Shepperd S, Gonçalves?Bradley DC, Straus SE, Wee B. Hospital at home: home-based end-of-
- 38 life care. *Cochrane Database of Systematic Reviews*. 2016.
- 39 72. Shepperd S, Iliffe S, Doll HA, Clarke MJ, Kalra L, Wilson AD, et al. Admission avoidance
- 40 hospital at home. *Cochrane Database of Systematic Reviews*. 2016.
- 41 73. Totten AM, White-Chu EF, Wasson N, Morgan E, Kansagara D, Davis-O'Reilly C, et al. Home-
- 42 Based Primary Care Interventions 2016 2016/02/None.
- 43 74. Veale D, Naismith I, Miles S, Gledhill LJ, Stewart G, Hodsoll J. Outcomes for residential or
- 44 inpatient intensive treatment of obsessive-compulsive disorder: A systematic review and meta-
- 45 analysis. *Journal of Obsessive-Compulsive and Related Disorders*. 2016;8:38-49.
- 46 75. Vinson DR, Zehtabchi S, Yealy DM. Can selected patients with newly diagnosed pulmonary
- 47 embolism be safely treated without hospitalization? A systematic review. *Annals of emergency*
- 48 *medicine*. 2012;60(5):651-62.e4.
- 49 76. Wong CX, Carson KV, Smith BJ. Home care by outreach nursing for chronic obstructive
- 50 pulmonary disease. *Cochrane Database Syst Rev*. 2012(4):CD000994.
- 51 77. Yoo HH, Queluz TH, El Dib R. Outpatient versus inpatient treatment for acute pulmonary
- 52 embolism. *Cochrane Database Syst Rev*. 2014(11):CD010019.
- 53 78. Zondag W, Kooiman J, Klok FA, Dekkers OM, Huisman MV. Outpatient versus inpatient
- 54 treatment in patients with pulmonary embolism: a meta-analysis. *Eur Respir J*. 2013;42(1):134-44.
- 55
- 56
- 57
- 58
- 59
- 60

- 1
  - 2
  - 3
  - 4
  - 5
  - 6
  - 7
  - 8
  - 9
  - 10
  - 11
  - 12
  - 13
  - 14
  - 15
  - 16
  - 17
  - 18
  - 19
  - 20
  - 21
  - 22
  - 23
  - 24
  - 25
  - 26
  - 27
  - 28
  - 29
  - 30
  - 31
  - 32
  - 33
  - 34
  - 35
  - 36
  - 37
  - 38
  - 39
  - 40
  - 41
  - 42
  - 43
  - 44
  - 45
  - 46
  - 47
  - 48
  - 49
  - 50
  - 51
  - 52
  - 53
  - 54
  - 55
  - 56
  - 57
  - 58
  - 59
  - 60
79. Ansari S, Boyle A. Emergency department-based interventions for women suffering domestic abuse: a critical literature review. *Eur J Emerg Med.* 2017;24(1):13-8.
80. da Silva Soares D, Nunes CM, Gomes B. Effectiveness of Emergency Department Based Palliative Care for Adults with Advanced Disease: A Systematic Review. *J Palliat Med.* 2016;19(6):601-9.
81. Landy MS, Davey CJ, Quintero D, Pecora A, McShane KE. A Systematic Review on the Effectiveness of Brief Interventions for Alcohol Misuse among Adults in Emergency Departments. *Journal of substance abuse treatment.* 2015;61:1-12.
82. Abbott LS, Elliott LT. Eliminating Health Disparities through Action on the Social Determinants of Health: A Systematic Review of Home Visiting in the United States, 2005-2015. *Public health nursing (Boston, Mass).* 2017;34(1):2-30.
83. Avellar SA, Supplee LH. Effectiveness of home visiting in improving child health and reducing child maltreatment. *Pediatrics.* 2013;132 Suppl 2:S90-9.
84. Filene JH, Kaminski JW, Valle LA, Cachat P. Components associated with home visiting program outcomes: a meta-analysis. *Pediatrics.* 2013;132 Suppl 2:S100-9.
85. Peacock S, Konrad S, Watson E, Nickel D, Muhajarine N. Effectiveness of home visiting programs on child outcomes: a systematic review. *BMC Public Health.* 2013;13:17.
86. Prosmán G-J, Wong SHLF, van der Wouden JC, Lagro-Janssen ALM. Effectiveness of home visiting in reducing partner violence for families experiencing abuse: A systematic review. *Family Practice.* 2015;32(3).
87. Turnbull C OD. Home visits during pregnancy and after birth for women with an alcohol or drug problem. *Cochrane Database of Systematic Reviews.* 2012.
88. Cochrane A, Furlong M, McGilloway S, Molloy DW, Stevenson M, Donnelly M. Time-limited home-care reablement services for maintaining and improving the functional independence of older adults. *Cochrane Database Syst Rev.* 2016;10:CD010825.
89. Florez-Garcia M, Garcia-Perez F, Curbelo R, Perez-Porta I, Nishishinya B, Rosario Lozano MP, et al. Efficacy and safety of home-based exercises versus individualized supervised outpatient physical therapy programs after total knee arthroplasty: a systematic review and meta-analysis. *Knee Surg Sports Traumatol Arthrosc.* 2017;25(11):3340-53.
90. Legg L, Gladman J, Drummond A, Davidson A. A systematic review of the evidence on home care reablement services. *Clin Rehabil.* 2016;30(8):741-9.
91. Showell NN, Fawole O, Segal J, Wilson RF, Cheskin LJ, Bleich SN, et al. A systematic review of home-based childhood obesity prevention studies. *Pediatrics.* 2013;132(1):e193-200.
92. Li D, Yang Z, Kang P, Xie X. Home-Based Compared with Hospital-Based Rehabilitation Program for Patients Undergoing Total Knee Arthroplasty for Osteoarthritis: A Systematic Review and Meta-analysis of Randomized Controlled Trials. *American journal of physical medicine & rehabilitation / Association of Academic Physiatrists.* 2016;96(6):440-7.
93. Williams JW, Jackson GL, Powers BJ, Chatterjee R, Bettger JP, Kemper AR, et al. Closing the quality gap: revisiting the state of the science (vol. 2: the patient-centered medical home). *Evidence report/technology assessment.* 2012(208.2):1-210.
94. Smyth MA, Brace-McDonnell SJ, Perkins GD. Impact of Prehospital Care on Outcomes in Sepsis: A Systematic Review. *West J Emerg Med.* 2016;17(4):427-37.
95. Denno DM, Chandra-Mouli V, Osman M. Reaching youth with out-of-facility HIV and reproductive health services: a systematic review. *J Adolesc Health.* 2012;51(2):106-21.
96. Bains RM, Diallo AF. Mental Health Services in School-Based Health Centers: Systematic Review. *J Sch Nurs.* 2016;32(1):8-19.
97. Knopf JA, Finnie RK, Peng Y, Hahn RA, Truman BI, Vernon-Smiley M, et al. School-Based Health Centers to Advance Health Equity: A Community Guide Systematic Review. *American journal of preventive medicine.* 2016;51(1):114-26.

- 1  
2  
3 98. Capone G, Schroder, T., Clarke, S. and Braham, L. Outcomes of therapeutic community  
4 treatment for personality disorder. *Therapeutic Communities: The International Journal of*  
5 *Therapeutic Communities*. 2016;37(2):84-100.
- 6 99. Magor-Blatch L, Bhullar N, Thomson B, Thorsteinsson E. A systematic review of studies  
7 examining effectiveness of therapeutic communities. *Therapeutic Communities*. 2014;35(4).
- 8 100. Long L, Abraham C, Paquette R, Shahmanesh M, Llewellyn C, Townsend A, et al. Brief  
9 interventions to prevent sexually transmitted infections suitable for in-service use: A systematic  
10 review. *Preventive medicine*. 2016;91:364-82.
- 11 101. Yin Ling W, Maria, K., Andrew, B., Thomas, E. and Heather, O. D. Centralisation of services  
12 for gynaecological cancer. *Cochrane Database of Systematic Reviews*. 2012.
- 13 102. Galvagno Jr SM, Sikorski, R., Hirshon, J. M., Floccare, D., Stephens, C., Beecher, D. and  
14 Thomas, S. Helicopter emergency medical services for adults with major trauma. *Cochrane Database*  
15 *of Systematic Reviews*. 2015.
- 16 103. Donald F, Martin-Misener R, Carter N, Donald EE, Kaasalainen S, Wickson-Griffiths A, et al. A  
17 systematic review of the effectiveness of advanced practice nurses in long-term care. *Journal of*  
18 *advanced nursing*. 2013;69(10):2148-61.
- 19 104. Morilla-Herrera JC, Garcia-Mayor S, Martín-Santos FJ, Kaknani Uttumchandani S, Leon  
20 Campos Á, Caro Bautista J, et al. A systematic review of the effectiveness and roles of advanced  
21 practice nursing in older people. *International journal of nursing studies*. 2015;53:290-307.
- 22 105. Jayaraman S, Sethi D, Wong R. Advanced training in trauma life support for ambulance  
23 crews. *Cochrane Database of Systematic Reviews*. 2014(8).
- 24 106. Jayaraman S, Sethi D, Chinnock P, Wong R. Advanced trauma life support training for  
25 hospital staff. *Cochrane Database Syst Rev*. 2014(8):CD004173.
- 26 107. Leung P, Orgeta V, Orrell M. The effects on carer well-being of carer involvement in  
27 cognition-based interventions for people with dementia: a systematic review and meta-analysis. *Int J*  
28 *Geriatr Psychiatry*. 2017;32(4):372-85.
- 29 108. Bigham BL, Kennedy SM, Drennan I, Morrison LJ. Expanding paramedic scope of practice in  
30 the community: a systematic review of the literature. *Prehosp Emerg Care*. 2013;17(3):361-72.
- 31 109. Kim K, Choi JS, Choi E, Nieman CL, Joo JH, Lin FR, et al. Effects of Community-Based Health  
32 Worker Interventions to Improve Chronic Disease Management and Care Among Vulnerable  
33 Populations: A Systematic Review. *American journal of public health*. 2016;106(4):e1-e26.
- 34 110. Maravilla JC, Betts KS, Abajobir AA, Couto ECC, Alati R. The Role of Community Health  
35 Workers in Preventing Adolescent Repeat Pregnancies and Births. *J Adolesc Health*. 2016;59(4):378-  
36 90.
- 37 111. Patel S, Patel S. The Effectiveness of Lactation Consultants and Lactation Counselors on  
38 Breastfeeding Outcomes. *J Hum Lact*. 2016;32(3):530-41.
- 39 112. Barnard S, Kim C, Park MH, Ngo TD. Doctors or mid-level providers for abortion. *Cochrane*  
40 *Database Syst Rev*. 2015(7):CD011242.
- 41 113. Brocklehurst P, Mertz B, Jerkovic-Cosic K, Littlewood A, Tickle M. Direct access to midlevel  
42 dental providers: an evidence synthesis. *J Public Health Dent*. 2014;74(4):326-35.
- 43 114. Candelas G, Villaverde V, García S, Guerra M, León MJ, Cañete JD. Benefit of health  
44 education by a training nurse in patients with axial and/or peripheral psoriatic arthritis: A systematic  
45 literature review. *Rheumatology international*. 2016.
- 46 115. Creedon R, Byrne S, Kennedy J, McCarthy S. The impact of nurse prescribing on the clinical  
47 setting. *British journal of nursing (Mark Allen Publishing)*. 2015;24(17):878-85.
- 48 116. Day LW, Siao D, Inadomi JM, Somsouk M. Non-physician performance of lower and upper  
49 endoscopy: a systematic review and meta-analysis. *Endoscopy*. 2014;46(5):401-10.
- 50 117. Dyer TA, Brocklehurst P, Glenny AM, Davies L, Tickle M, Issac A, et al. Dental auxiliaries for  
51 dental care traditionally provided by dentists. *Cochrane Database Syst Rev*. 2014(8):CD010076.
- 52  
53  
54  
55  
56  
57  
58  
59  
60

- 1  
2  
3 118. Hines S, Munday J, Kynoch K. Effectiveness of nurse-led preoperative assessment services for  
4 elective surgery: a systematic review update. *JBI database of systematic reviews and*  
5 *implementation reports*. 2015;13(6):279-317.
- 6 119. Kilpatrick K, Reid K, Carter N, Donald F, Bryant-Lukosius D, Martin-Misener R, et al. A  
7 *Systematic Review of the Cost-Effectiveness of Clinical Nurse Specialists and Nurse Practitioners in*  
8 *Inpatient Roles*. *Nursing leadership (Toronto, Ont)*. 2015;28(3):56-76.
- 9 120. Kuethe MC, Vaessen-Verberne AA, Elbers RG, Van Aalderen WM. Nurse versus physician-led  
10 care for the management of asthma. *Cochrane Database Syst Rev*. 2013(2):CD009296.
- 11 121. Lewis SR, Nicholson A, Smith AF, Alderson P. Physician anaesthetists versus non-physician  
12 providers of anaesthesia for surgical patients. *Cochrane Database Syst Rev*. 2014(7):CD010357.
- 13 122. Martinez-Gonzalez NA, Tandjung R, Djalali S, Huber-Geismann F, Markun S, Rosemann T.  
14 Effects of physician-nurse substitution on clinical parameters: a systematic review and meta-  
15 analysis. *PLoS One*. 2014;9(2):e89181.
- 16 123. Ngo TD, Park MH, Free C. Safety and effectiveness of termination services performed by  
17 doctors versus midlevel providers: a systematic review and analysis. *Int J Womens Health*. 2013;5:9-  
18 17.
- 19 124. Nicholson A, Coldwell CH, Lewis SR, Smith AF. Nurse-led versus doctor-led preoperative  
20 assessment for elective surgical patients requiring regional or general anaesthesia. *Cochrane*  
21 *Database Syst Rev*. 2013(11):CD010160.
- 22 125. Parker D, Maresco-Pennisi D, Clifton K, Shams R, Young J. Practice nurse involvement in the  
23 management of adults with type 2 diabetes mellitus attending a general practice: results from a  
24 systematic review. *International journal of evidence-based healthcare*. 2016;14(2):41-52.
- 25 126. Renner RM, Brahmi, D. and Kapp, N. Who can provide effective and safe termination of  
26 pregnancy care? A systematic review. *BJOG : an international journal of obstetrics and gynaecology*.  
27 2013.
- 28 127. Sandall J, Soltani H, Gates S, Shennan A, Devane D. Midwife-led continuity models versus  
29 other models of care for childbearing women. *Cochrane Database Syst Rev*. 2016;4:CD004667.
- 30 128. Snarterse M, Dobber J, Jepma P, Peters RJ, Ter Riet G, Boekholdt SM, et al. Effective  
31 components of nurse-coordinated care to prevent recurrent coronary events: a systematic review  
32 and meta-analysis. *Heart*. 2016;102(1):50-6.
- 33 129. Stephens M, Hourigan LF, Appleyard M, Ostapowicz G, Schoeman M, Desmond PV, et al.  
34 Non-physician endoscopists: A systematic review. *World J Gastroenterol*. 2015;21(16):5056-71.
- 35 130. Tho PC, Ang E. The effectiveness of patient navigation programs for adult cancer patients  
36 undergoing treatment: a systematic review. *JBI database of systematic reviews and implementation*  
37 *reports*. 2016;14(2):295-321.
- 38 131. Van Camp YP, Van Rompaey B, Elseviers MM. Nurse-led interventions to enhance adherence  
39 to chronic medication: systematic review and meta-analysis of randomised controlled trials. *Eur J*  
40 *Clin Pharmacol*. 2013;69(4):761-70.
- 41 132. Weeks G, George J, Maclure K, Stewart D. Non-medical prescribing versus medical  
42 prescribing for acute and chronic disease management in primary and secondary care. *Cochrane*  
43 *Database Syst Rev*. 2016;11:CD011227.
- 44 133. Wright JT, Graham F, Hayes C, Ismail AI, Noraian KW, Weyant RJ, et al. A systematic review  
45 of oral health outcomes produced by dental teams incorporating midlevel providers. *J Am Dent*  
46 *Assoc*. 2013;144(1):75-91.
- 47 134. Zhu QM, Liu J, Hu HY, Wang S. Effectiveness of nurse-led early discharge planning  
48 programmes for hospital inpatients with chronic disease or rehabilitation needs: a systematic review  
49 and meta-analysis. *J Clin Nurs*. 2015;24(19-20):2993-3005.
- 50 135. Zweers D, de Graaf E, Teunissen SC. Non-pharmacological nurse-led interventions to manage  
51 anxiety in patients with advanced cancer: A systematic literature review. *International journal of*  
52 *nursing studies*. 2015;56:102-13.
- 53  
54  
55  
56  
57  
58  
59  
60



- 1  
2  
3 136. Martinez-Gonzalez NA, Djalali S, Tandjung R, Huber-Geismann F, Markun S, Wensing M, et al. Substitution of physicians by nurses in primary care: a systematic review and meta-analysis. *BMC Health Serv Res.* 2014;14:214.
- 4  
5  
6 137. Bryan AE, Arkowitz H. Meta-analysis of the effects of peer-administered psychosocial interventions on symptoms of depression. *Am J Community Psychol.* 2015;55(3-4):455-71.
- 7  
8 138. MacArthur GJ, Harrison S, Caldwell DM, Hickman M, Campbell R. Peer-led interventions to prevent tobacco, alcohol and/or drug use among young people aged 11-21 years: a systematic review and meta-analysis. *Addiction (Abingdon, England).* 2015;111(3):391-407.
- 9  
10 139. Pitt V, Lowe D, Hill S, Pictor M, Hetrick SE, Ryan R, et al. Consumer-providers of care for adult clients of statutory mental health services. *Cochrane Database Syst Rev.* 2013(3):CD004807.
- 11  
12 140. Raphael JL, Rueda A, Lion KC, Giordano TP. The role of lay health workers in pediatric chronic disease: a systematic review. *Acad Pediatr.* 2013;13(5):408-20.
- 13  
14 141. Stubbs B, Williams J, Shannon J, Gaughran F, Craig T. Peer support interventions seeking to improve physical health and lifestyle behaviours among people with serious mental illness: A systematic review. *International journal of mental health nursing.* 2016;25(6):484-95.
- 15  
16 142. Al-Jumah KA, Qureshi NA. Impact of pharmacist interventions on patients' adherence to antidepressants and patient-reported outcomes: a systematic review. *Patient Prefer Adherence.* 2012;6:87-100.
- 17  
18 143. Baroy J, Chung D, Frisch R, Apgar D, Slack MK. The impact of pharmacist immunization programs on adult immunization rates: A systematic review and meta-analysis. *Journal of the American Pharmacists Association : JAPhA.* 2016;56(4):418-26.
- 19  
20 144. Brown TJ, Todd A, O'Malley CL, Moore HJ, Husband AK, Bamba C, et al. Community pharmacy interventions for public health priorities: a systematic review of community pharmacy-delivered smoking, alcohol and weight management interventions 2016 2016/03/None.
- 21  
22 145. Davis EM, Packard KA, Jackevicius CA. The pharmacist role in predicting and improving medication adherence in heart failure patients. *Journal of managed care pharmacy : JMCP.* 2014;20(7):741-55.
- 23  
24 146. Garcia-Cardenas V, Armour C, Benrimoj SI, Martinez-Martinez F, Rotta I, Fernandez-Llimos F. Pharmacists' interventions on clinical asthma outcomes: a systematic review. *Eur Respir J.* 2016;47(4):1134-43.
- 25  
26 147. Kang JE, Han NY, Oh JM, Jin HK, Kim HA, Son IJ, et al. Pharmacist-involved care for patients with heart failure and acute coronary syndrome: a systematic review with qualitative and quantitative meta-analysis. *J Clin Pharm Ther.* 2016;41(2):145-57.
- 27  
28 148. Lindsey L, Husband A, Nazar H, Todd A. Promoting the early detection of cancer: A systematic review of community pharmacy-based education and screening interventions. *Cancer epidemiology.* 2015;39(5):673-81.
- 29  
30 149. Mekonnen AB, McLachlan AJ, Brien JA. Effectiveness of pharmacist-led medication reconciliation programmes on clinical outcomes at hospital transitions: a systematic review and meta-analysis. *BMJ open.* 2016.
- 31  
32 150. Mohammed MA, Moles RJ, Chen TF. Impact of Pharmaceutical Care Interventions on Health-Related Quality-of-Life Outcomes: A Systematic Review and Meta-analysis. *The Annals of pharmacotherapy.* 2016;50(10):862-81.
- 33  
34 151. Nazar H, Nazar Z, Portlock J, Todd A, Slight SP. A systematic review of the role of community pharmacies in improving the transition from secondary to primary care. *Br J Clin Pharmacol.* 2015;80(5):936-48.
- 35  
36 152. Obreli-Neto PR, Marques Dos Reis T, Guidoni CM, Giroto E, Guerra ML, de Oliveira Baldoni A, et al. A Systematic Review of the Effects of Continuing Education Programs on Providing Clinical Community Pharmacy Services. *Am J Pharm Educ.* 2016;80(5):88.
- 37  
38 153. O'Neal KS, Crosby KM. What is the Role of the Pharmacist in Obesity Management? *Current obesity reports.* 2014;3(3):298-306.
- 39  
40  
41  
42  
43  
44  
45  
46  
47  
48  
49  
50  
51  
52  
53  
54  
55  
56  
57  
58  
59  
60

- 1  
2  
3 154. Pande S, Hiller JE, Nkansah N, Bero L. The effect of pharmacist-provided non-dispensing  
4 services on patient outcomes, health service utilisation and costs in low- and middle-income  
5 countries. *Cochrane Database Syst Rev.* 2013(2):CD010398.
- 6 155. Paudyal V, Watson MC, Sach T, Porteous T, Bond CM, Wright DJ, et al. Are pharmacy-based  
7 minor ailment schemes a substitute for other service providers? A systematic review. *Br J Gen Pract.*  
8 2013;63(612):e472-81.
- 9 156. Renaudin P, Boyer L, Esteve MA, Bertault-Peres P, Auquier P, Honore S. Do pharmacist-led  
10 medication reviews in hospitals help reduce hospital readmissions? A systematic review and meta-  
11 analysis. *British journal of clinical pharmacology.* 2016.
- 12 157. Riordan DO, Walsh KA, Galvin R, Sinnott C, Kearney PM, Byrne S. The effect of pharmacist-  
13 led interventions in optimising prescribing in older adults in primary care: A systematic review. *SAGE*  
14 *Open Med.* 2016;4:2050312116652568.
- 15 158. Sabater-Hernández D, Sabater-Galindo M, Fernandez-Llimos F, Rotta I, Hossain LN, Durks D,  
16 et al. A Systematic Review of Evidence-Based Community Pharmacy Services Aimed at the  
17 Prevention of Cardiovascular Disease. *Journal of managed care & specialty pharmacy.*  
18 2016;22(6):699-713.
- 19 159. Saberi P, Dong BJ, Johnson MO, Greenblatt RM, Cocohoba JM. The impact of HIV clinical  
20 pharmacists on HIV treatment outcomes: a systematic review. *Patient Prefer Adherence.*  
21 2012;6:297-322.
- 22 160. Salgado TM, Moles R, Benrimoj SI, Fernandez-Llimos F. Pharmacists' interventions in the  
23 management of patients with chronic kidney disease: a systematic review. *Nephrol Dial Transplant.*  
24 2012;27(1):276-92.
- 25 161. van Eikenhorst L, Salema NE, Anderson C. A systematic review in select countries of the role  
26 of the pharmacist in consultations and sales of non-prescription medicines in community pharmacy.  
27 *Research in social & administrative pharmacy : RSAP.* 2017;13(1):17-38.
- 28 162. Walsh KA, O'Riordan D, Kearney PM, Timmons S, Byrne S. Improving the appropriateness of  
29 prescribing in older patients: a systematic review and meta-analysis of pharmacists' interventions in  
30 secondary care. *Age Ageing.* 2016;45(2):201-9.
- 31 163. Wang T, Benedict N, Olsen KM, Luan R, Zhu X, Zhou N, et al. Effect of critical care  
32 pharmacist's intervention on medication errors: A systematic review and meta-analysis of  
33 observational studies. *Journal of critical care.* 2015;30(5):1101-6.
- 34 164. Zhou S, Sheng XY, Xiang Q, Wang ZN, Zhou Y, Cui YM. Comparing the effectiveness of  
35 pharmacist-managed warfarin anticoagulation with other models: a systematic review and meta-  
36 analysis. *J Clin Pharm Ther.* 2016;41(6):602-11.
- 37 165. Khangura JK FG, Perera R, Rowe BH, Shepperd S. Primary care professionals providing  
38 non-urgent care in hospital emergency departments. *Cochrane Database of Systematic Reviews.*  
39 2012.
- 40 166. Kim SL, Tarn DM. Effect of Primary Care Involvement on End-of-Life Care Outcomes: A  
41 Systematic Review. *J Am Geriatr Soc.* 2016;64(10):1968-74.
- 42 167. Hardy M, Johnson L, Sharples R, Boynes S, Irving D. Does radiography advanced practice  
43 improve patient outcomes and health service quality? A systematic review. *The British journal of*  
44 *radiology.* 2016.
- 45 168. Baik SH, Gallo LC, Wells KJ. Patient Navigation in Breast Cancer Treatment and Survivorship:  
46 A Systematic Review. *Journal of clinical oncology : official journal of the American Society of Clinical*  
47 *Oncology.* 2016;34(30):3686-96.
- 48 169. Ahl A, Mikocka-Walus A, Gordon A, Andrews JM. Are self-administered or minimal therapist  
49 contact psychotherapies an effective treatment for irritable bowel syndrome (IBS): a systematic  
50 review. *Journal of psychosomatic research.* 2013;75(2):113-20.
- 51 170. Ahmad Sharoni SK, Minhat HS, Mohd Zulkefli NA, Baharom A. Health education programmes  
52 to improve foot self-care practices and foot problems among older people with diabetes: a  
53 systematic review. *International journal of older people nursing.* 2016;11(3):214-39.
- 54  
55  
56  
57  
58  
59  
60



- 1  
2  
3 171. Brady TJ, Murphy L, O'Colmain BJ, Beauchesne D, Daniels B, Greenberg M, et al. A meta-  
4 analysis of health status, health behaviors, and healthcare utilization outcomes of the Chronic  
5 Disease Self-Management Program. *Prev Chronic Dis*. 2013;10:120112.
- 6 172. Heneghan CJ, Garcia-Alamino JM, Spencer EA, Ward AM, Perera R, Bankhead C, et al. Self-  
7 monitoring and self-management of oral anticoagulation. *Cochrane Database Syst Rev*.  
8 2016;7:CD003839.
- 9 173. Howcroft M, Walters EH, Wood-Baker R, Walters JA. Action plans with brief patient  
10 education for exacerbations in chronic obstructive pulmonary disease. *Cochrane Database Syst Rev*.  
11 2016;12:CD005074.
- 12 174. Jansons PS, Haines TP, O'Brien L. Interventions to achieve ongoing exercise adherence for  
13 adults with chronic health conditions who have completed a supervised exercise program:  
14 systematic review and meta-analysis. *Clin Rehabil*. 2017;31(4):465-77.
- 15 175. Kopke S, Solari A, Khan F, Heesen C, Giordano A. Information provision for people with  
16 multiple sclerosis. *Cochrane Database Syst Rev*. 2014(4):CD008757.
- 17 176. Leidy Johanna Rueda DaDLMd, C. The efficacy of telephone use to assist and improve the  
18 wellbeing of family caregivers of persons with chronic diseases: a systematic review. *JB Library of*  
19 *Systematic Reviews*. 2015.
- 20 177. Mayo-Wilson E, Montgomery P. Media-delivered cognitive behavioural therapy and  
21 behavioural therapy (self-help) for anxiety disorders in adults. *Cochrane Database Syst Rev*.  
22 2013(9):CD005330.
- 23 178. McDermott MS, While AE. Maximizing the healthcare environment: A systematic review  
24 exploring the potential of computer technology to promote self-management of chronic illness in  
25 healthcare settings. *Patient education and counseling*. 2013;92(1):13-22.
- 26 179. Millard T, Elliott J, Girdler S. Self-management education programs for people living with  
27 HIV/AIDS: a systematic review. *AIDS Patient Care STDS*. 2013;27(2):103-13.
- 28 180. Richardson SJ, Brooks HL, Bramley G, Coleman JJ. Evaluating the effectiveness of self-  
29 administration of medication (SAM) schemes in the hospital setting: a systematic review of the  
30 literature. *PLoS One*. 2014;9(12):e113912.
- 31 181. Urquhart C, Currell R, Harlow F, Callow L. Home uterine monitoring for detecting preterm  
32 labour. *Cochrane Database Syst Rev*. 2017;2:CD006172.
- 33 182. O'Sullivan JW, Harvey RT, Glasziou PP, McCullough A. Written information for patients (or  
34 parents of child patients) to reduce the use of antibiotics for acute upper respiratory tract infections  
35 in primary care. *Cochrane Database of Systematic Reviews*. 2016.
- 36 183. Aubin M, Giguère, A., Martin, M., Verreault, R., Fitch, M. I., Kazanjian, A., Carmichael, P. H.  
37 Interventions to improve continuity of care in the follow-up of patients with cancer. *Cochrane*  
38 *Database of Systematic Reviews*. 2012.
- 39 184. Balogh R, McMorris CA, Lunsy Y, Ouellette-Kuntz H, Bourne L, Colantonio A, et al.  
40 Organising healthcare services for persons with an intellectual disability. *Cochrane Database Syst*  
41 *Rev*. 2016;4:CD007492.
- 42 185. Baptista DR, Wiens A, Pontarolo R, Regis L, Reis WC, Correr CJ. The chronic care model for  
43 type 2 diabetes: a systematic review. *Diabetology & metabolic syndrome*. 2016;8(1):7.
- 44 186. Bhuyan SS, Chandak A, Smith P, Carlton EL, Duncan K, Gentry D. Integration of public health  
45 and primary care: A systematic review of the current literature in primary care physician mediated  
46 childhood obesity interventions. *Obesity research & clinical practice*. 2015;9(6):539-52.
- 47 187. Busetto L, Luijkx KG, Elissen AM, Vrijhoef HJ. Intervention types and outcomes of integrated  
48 care for diabetes mellitus type 2: a systematic review. *J Eval Clin Pract*. 2016;22(3):299-310.
- 49 188. Desmedt M, Vertriest S, Hellings J, Bergs J, Dessers E, Vankrunkelsven P, et al. Economic  
50 Impact of Integrated Care Models for Patients with Chronic Diseases: A Systematic Review. *Value in*  
51 *Health*. 2016;19(6):892-902.
- 52  
53  
54  
55  
56  
57  
58  
59  
60

189. Driscoll A, Meagher S, Kennedy R, Hay M, Banerji J, Campbell D, et al. What is the impact of systems of care for heart failure on patients diagnosed with heart failure: a systematic review. *BMC cardiovascular disorders*. 2016.
190. Grant SJ, Frawley J, Bensoussan A. Process of care in outpatient Integrative healthcare facilities: a systematic review of clinical trials. *BMC Health Serv Res*. 2015;15:322.
191. Hopman P, de Bruin SR, Forjaz MJ, Rodriguez-Blazquez C, Tonnara G, Lemmens LC, et al. Effectiveness of comprehensive care programs for patients with multiple chronic conditions or frailty: A systematic literature review. *Health policy (Amsterdam, Netherlands)*. 2016;120(7):818-32.
192. Hwang W, Chang J, Laclair M, Paz H. Effects of integrated delivery system on cost and quality. *Am J Manag Care*. 2013;19(5):e175-84.
193. Stellefson M, Dipnarine K, Stopka C. The chronic care model and diabetes management in US primary care settings: a systematic review. *Prev Chronic Dis*. 2013;10:E26.
194. Takeda A, Taylor SJ, Taylor RS, Khan F, Krum H, Underwood M. Clinical service organisation for heart failure. *Cochrane Database Syst Rev*. 2012(9):CD002752.
195. Tully PJ, Baumeister H. Collaborative care for comorbid depression and coronary heart disease: a systematic review and meta-analysis of randomised controlled trials. *BMJ Open*. 2015;5(12):e009128.
196. Woltmann E, Grogan-Kaylor A, Perron B, Georges H, Kilbourne AM, Bauer MS. Comparative effectiveness of collaborative chronic care models for mental health conditions across primary, specialty, and behavioral health care settings: systematic review and meta-analysis. *Am J Psychiatry*. 2012;169(8):790-804.
197. Yeung CH, Santesso N, Pai M, Kessler C, Key NS, Makris M, et al. Care models in the management of haemophilia: a systematic review. *Haemophilia*. 2016;22 Suppl 3:31-40.
198. Zhou K, Fitzpatrick T, Walsh N, Kim JY, Chou R, Lackey M, et al. Interventions to optimise the care continuum for chronic viral hepatitis: a systematic review and meta-analyses. *The Lancet Infectious diseases*. 2016;16(12):1409-22.
199. Kodjebacheva GD, Sabo T, Xiong J. Interventions to improve child-parent-medical provider communication: A systematic review. *Soc Sci Med*. 2016;166:120-7.
200. Nevis I. Educational Intervention in End-of-Life Care: An Evidence-Based Analysis. *Ont Health Technol Assess Ser*. 2014;14(17):1-30.
201. Zipkin DA, Umscheid CA, Keating NL, Allen E, Aung K, Beyth R, et al. Evidence-Based Risk Communication: A Systematic Review. *Annals of Internal Medicine*. 2014;161(4):270-80.
202. Dwamena F, Holmes-Rovner, M., Gaulden, C. M., Jorgenson, S., Sadigh, G., Sikorskii, A., Lewin, S., Smith, R. C., Coffey, J., Olomu, A. Interventions for providers to promote a patient-centred approach in clinical consultations. *Cochrane Database of Systematic Reviews*. 2012.
203. Legare F, Stacey D, Turcotte S, Cossi MJ, Kryworuchko J, Graham ID, et al. Interventions for improving the adoption of shared decision making by healthcare professionals. *Cochrane Database Syst Rev*. 2014(9):CD006732.
204. Coxeter P, Del Mar, C. B., McGregor, L., Beller, E. M. and Hoffmann, T. C. Interventions to facilitate shared decision making to address antibiotic use for acute respiratory infections in primary care. *Cochrane Database of Systematic Reviews*. 2015.
205. Feldman-Stewart D, O'Brien, M. A., Clayman, M. L., Davison, B. J., Jimbo, M., Labrecque, M., Martin, R. W. and Shepherd, H. Providing information about options in patient decision aids. *BMC medical informatics and decision making*. 2013.
206. Horey D, Kealy, M., Davey, M., Small, R., Crowther, C. A. Interventions for supporting pregnant women's decision-making about mode of birth after a caesarean. *Cochrane Database of Systematic Reviews*. 2013.
207. Kashaf MSaM, E. Does Shared Decision Making in Cancer Treatment Improve Quality of Life? A Systematic Literature Review. *Medical decision making : an international journal of the Society for Medical Decision Making*. 2015.

- 1  
2  
3 208. Nilsson C, Lundgren I, Smith V, Vehvilainen-Julkunen K, Nicoletti J, Devane D, et al. Women-centred interventions to increase vaginal birth after caesarean section (VBAC): A systematic review. *Midwifery*. 2015;31(7):657-63.
- 4  
5  
6 209. Peterson EB, Ostroff JS, DuHamel KN, D'Agostino TA, Hernandez M, Canzona MR, et al. Impact of provider-patient communication on cancer screening adherence: A systematic review. *Preventive medicine*. 2016;93:96-105.
- 7  
8  
9 210. Stacey D, Legare F, Lewis K, Barry MJ, Bennett CL, Eden KB, et al. Decision aids for people facing health treatment or screening decisions. *Cochrane Database Syst Rev*. 2017;4:CD001431.
- 10  
11  
12 211. van Weert JC, van Munster BC, Sanders R, Spijker R, Hooft L, Jansen J. Decision aids to help older people make health decisions: a systematic review and meta-analysis. *BMC Med Inform Decis Mak*. 2016;16:45.
- 13  
14  
15 212. Volk RJ, Linder SK, Lopez-Olivo MA, Kamath GR, Reuland DS, Saraykar SS, et al. Patient Decision Aids for Colorectal Cancer Screening: A Systematic Review and Meta-analysis. *American journal of preventive medicine*. 2016;51(5):779-91.
- 16  
17  
18 213. Smith TO, Hameed YA, Cross JL, Henderson C, Sahota O, Fox C. Enhanced rehabilitation and care models for adults with dementia following hip fracture surgery. *Cochrane Database Syst Rev*. 2015(6):CD010569.
- 19  
20  
21 214. Houben CH, Spruit MA, Groenen MT, Wouters EF, Janssen DJ. Efficacy of Advance Care Planning: A Systematic Review and Meta-Analysis. *Journal of the American Medical Directors Association*. 2014;15(7):477-89.
- 22  
23  
24 215. Lim CE, Ng RW, Cheng NC, Cigolini M, Kwok C, Brennan F. Advance care planning for haemodialysis patients. *Cochrane Database Syst Rev*. 2016;7:CD010737.
- 25  
26  
27 216. Sumalinog R, Harrington K, Dosani N, Hwang SW. Advance care planning, palliative care, and end-of-life care interventions for homeless people: A systematic review. *Palliative medicine*. 2017;31(2):109-19.
- 28  
29  
30 217. Weathers E, O'Caoimh R, Cornally N, Fitzgerald C, Kearns T, Coffey A, et al. Advance care planning: A systematic review of randomised controlled trials conducted with older adults. *Maturitas*. 2016;91:101-9.
- 31  
32  
33 218. Bleich SN, Sherrod C, Chiang A, Boyd C, Wolff J, DuGoff E, et al. Systematic Review of Programs Treating High-Need and High-Cost People With Multiple Chronic Diseases or Disabilities in the United States, 2008-2014. *Prev Chronic Dis*. 2015;12:E197.
- 34  
35  
36 219. Dieterich M, Irving CB, Bergman H, Khokhar MA, Park B, Marshall M. Intensive case management for severe mental illness. *Cochrane Database Syst Rev*. 2017;1:CD007906.
- 37  
38  
39 220. Gillies D, Buykx P, Parker AG, Hetrick SE. Consultation liaison in primary care for people with mental disorders. *Cochrane Database Syst Rev*. 2015(9):CD007193.
- 40  
41  
42 221. Hickam DH, Weiss JW, Guise JM, Buckley D, Motu'apuaka M, Graham E, et al. Outpatient Case Management for Adults With Medical Illness and Complex Care Needs. *Outpatient Case Management for Adults With Medical Illness and Complex Care Needs*. AHRQ Comparative Effectiveness Reviews. Rockville (MD)2013.
- 43  
44  
45 222. Huntley AL, Johnson R, King A, Morris RW, Purdy S. Does case management for patients with heart failure based in the community reduce unplanned hospital admissions? A systematic review and meta-analysis. *BMJ open*. 2016.
- 46  
47  
48 223. Joo JY, Liu MF. Case management effectiveness in reducing hospital use: a systematic review. *International nursing review*. 2016.
- 49  
50  
51 224. Khanassov V, Vedel I. Family Physician-Case Manager Collaboration and Needs of Patients With Dementia and Their Caregivers: A Systematic Mixed Studies Review. *Annals of family medicine*. 2016.
- 52  
53  
54 225. Reilly S, Miranda-Castillo C, Malouf R, Hoe J, Toot S, Challis D, et al. Case management approaches to home support for people with dementia. *Cochrane Database Syst Rev*. 2015;1:CD008345.
- 55  
56  
57  
58  
59  
60

- 1  
2  
3 226. Somme D, Trouve H, Drame M, Gagnon D, Couturier Y, Saint-Jean O. Analysis of case  
4 management programs for patients with dementia: a systematic review. *Alzheimers Dement.*  
5 2012;8(5):426-36.  
6  
7 227. You EC, Dunt D, Doyle C, Hsueh A. Effects of case management in community aged care on  
8 client and carer outcomes: a systematic review of randomized trials and comparative observational  
9 studies. *BMC Health Serv Res.* 2012;12:395.  
10  
11 228. Tibingana-Ahimbisibwe B, Katabira C, Mpalampa L, Harrison RA. The effectiveness of  
12 adolescent-specific prenatal interventions on improving attendance and reducing harm during and  
13 after birth: a systematic review. *International journal of adolescent medicine and health.* 2016.  
14  
15 229. Fernandez Turienzo C, Sandall J, Peacock JL. Models of antenatal care to reduce and prevent  
16 preterm birth: a systematic review and meta-analysis. *BMJ Open.* 2016;6(1):e009044.  
17  
18 230. Ibrahim N, Michail, M. and Callaghan, P. The strengths based approach as a service delivery  
19 model for severe mental illness: A meta-analysis of clinical trials. *BMC Psychiatry.* 2014.  
20  
21 231. Jutkowitz E, Brasure M, Fuchs E, Shippee T, Kane RA, Fink HA, et al. Care-Delivery  
22 Interventions to Manage Agitation and Aggression in Dementia Nursing Home and Assisted Living  
23 Residents: A Systematic Review and Meta-analysis. *J Am Geriatr Soc.* 2016;64(3):477-88.  
24  
25 232. Kimmel AD, Martin EG, Galadima H, Bono RS, Tehrani AB, Cyrus JW, et al. Clinical outcomes  
26 of HIV care delivery models in the US: a systematic review. *AIDS care.* 2016;28(10):1-12.  
27  
28 233. Laver K, Milte R, Dyer S, Crotty M. A Systematic Review and Meta-Analysis Comparing Carer  
29 Focused and Dyadic Multicomponent Interventions for Carers of People With Dementia. *Journal of*  
30 *aging and health.* 2016.  
31  
32 234. Robertson J, Baines S, Emerson E, Hatton C. Service Responses to People with Intellectual  
33 Disabilities and Epilepsy: A Systematic Review. *J Appl Res Intellect Disabil.* 2017;30(1):1-32.  
34  
35 235. Fleeman N, Bradley PM, Lindsay B. Care delivery and self management strategies for children  
36 with epilepsy. *Cochrane Database Syst Rev.* 2015(12):CD006245.  
37  
38 236. Peytremann-Bridevaux I, Arditi C, Gex G, Bridevaux PO, Burnand B. Chronic disease  
39 management programmes for adults with asthma. *Cochrane Database Syst Rev.* 2015(5):CD007988.  
40  
41 237. Bird M, Anderson K, MacPherson S, Blair A. Do interventions with staff in long-term  
42 residential facilities improve quality of care or quality for life people with dementia? A systematic  
43 review of the evidence. *International psychogeriatrics.* 2016;28(12):1937-63.  
44  
45 238. Connell CJ, Endacott R, Jackman JA, Kiprillis NR, Sparkes LM, Cooper SJ. The effectiveness of  
46 education in the recognition and management of deteriorating patients: A systematic review. *Nurse*  
47 *education today.* 2016;44:133-45.  
48  
49 239. Moore PM, Rivera Mercado S, Grez Artigues M, Lawrie TA. Communication skills training for  
50 healthcare professionals working with people who have cancer. *Cochrane Database Syst Rev.*  
51 2013(3):CD003751.  
52  
53 240. Oliveira VC, Ferreira ML, Pinto RZ, Filho RF, Refshauge K, Ferreira PH. Effectiveness of  
54 Training Clinicians' Communication Skills on Patients' Clinical Outcomes: A Systematic Review. *J*  
55 *Manipulative Physiol Ther.* 2015;38(8):601-16.  
56  
57 241. Paneque M, Turchetti D, Jackson L, Lunt P, Houwink E, Skirton H. A systematic review of  
58 interventions to provide genetics education for primary care. *BMC family practice.* 2016;17:89.  
59  
60 242. Petriwskyj A, Parker, D., Brown Wilson, C. and Gibson, A. What Health and Aged Care Culture  
Change Models Mean for Residents and Their Families: A Systematic Review. *The Gerontologist.*  
2015.  
243. Seidu S, Walker NS, Bodicoat DH, Davies MJ, Khunti K. A systematic review of interventions  
targeting primary care or community based professionals on cardio-metabolic risk factor control in  
people with diabetes. *Diabetes Res Clin Pract.* 2016;113:1-13.  
244. Chan RJ, Webster J, Bowers A. End-of-life care pathways for improving outcomes in caring  
for the dying. *Cochrane Database Syst Rev.* 2016;2:CD008006.  
245. McCallum GB, Bailey EJ, Morris PS, Chang AB. Clinical pathways for chronic cough in children.  
*Cochrane Database Syst Rev.* 2014(9):CD006595.



- 1  
2  
3 246. Gordon SA, Reiter ER. Effectiveness of critical care pathways for head and neck cancer  
4 surgery: A systematic review. *Head & neck*. 2016;38(9):1421-7.
- 5 247. Niven DJ, Bastos JF, Stelfox HT. Critical Care Transition Programs and the Risk of Readmission  
6 or Death After Discharge From an ICU: A Systematic Review and Meta-Analysis. *Critical care*  
7 *medicine*. 2013;42(1):179-87.
- 8 248. Ambia J, Mandala J. A systematic review of interventions to improve prevention of mother-  
9 to-child HIV transmission service delivery and promote retention. *J Int AIDS Soc*. 2016;19(1):20309.
- 10 249. Brennan A, Browne JP, Horgan M. A systematic review of health service interventions to  
11 improve linkage with or retention in HIV care. *AIDS Care*. 2014;26(7):804-12.
- 12 250. Geldsetzer P, Yapa HM, Vaikath M, Ogbuaji O, Fox MP, Essajee SM, et al. A systematic review  
13 of interventions to improve postpartum retention of women in PMTCT and ART care. *J Int AIDS Soc*.  
14 2016;19(1):20679.
- 15 251. Maharaj R, Raffaele I, Wendon J. Rapid response systems: a systematic review and meta-  
16 analysis. *Critical care (London, England)*. 2015;19:254.
- 17 252. Fox MT, Persaud, M., Maimets, I., O'Brien, K., Brooks, D., Tregunno, D. and Schraa, E.  
18 Effectiveness of Acute Geriatric Unit Care Using Acute Care for Elders Components: A Systematic  
19 Review and Meta-Analysis. *Journal of the American Geriatrics Society*. 2012.
- 20 253. Atlantis E, Fahey P, Foster J. Collaborative care for comorbid depression and diabetes: a  
21 systematic review and meta-analysis. *BMJ Open*. 2014;4(4):e004706.
- 22 254. Cochrane A, Higgins NM, FitzGerald O, Gallagher P, Ashton J, Corcoran O, et al. Early  
23 interventions to promote work participation in people with regional musculoskeletal pain: a  
24 systematic review and meta-analysis. *Clin Rehabil*. 2017;31(11):1466-81.
- 25 255. Archer J, Bower, P., Gilbody, S., Lovell, K., Richards, D., Gask, L. Collaborative care for  
26 depression and anxiety problems. *Cochrane Database of Systematic Reviews*. 2012.
- 27 256. Bearne LM, Byrne AM, Segrave H, White CM. Multidisciplinary team care for people with  
28 rheumatoid arthritis: a systematic review and meta-analysis. *Rheumatol Int*. 2016;36(3):311-24.
- 29 257. Buecking B, Timmesfeld N, Riem S, Bliemel C, Hartwig E, Friess T, et al. Early orthogeriatric  
30 treatment of trauma in the elderly: a systematic review and metaanalysis. *Dtsch Arztebl Int*.  
31 2013;110(15):255-62.
- 32 258. Deschodt M, Flamaing J, Haentjens P, Boonen S, Milisen K. Impact of geriatric consultation  
33 teams on clinical outcome in acute hospitals: a systematic review and meta-analysis. *BMC Med*.  
34 2013;11:48.
- 35 259. Helou N, Dwyer A, Shaha M, Zanchi A. Multidisciplinary management of diabetic kidney  
36 disease: a systematic review and meta-analysis. *JBI database of systematic reviews and*  
37 *implementation reports*. 2016;14(7):169-207.
- 38 260. Hickman LD, Phillips JL, Newton PJ, Halcomb EJ, Al Abed N, Davidson PM. Multidisciplinary  
39 team interventions to optimise health outcomes for older people in acute care settings: A systematic  
40 review. *Archives of gerontology and geriatrics*. 2015;61(3):322-9.
- 41 261. Hubbeling D, Bertram R. Crisis resolution teams in the UK and elsewhere. *J Ment Health*.  
42 2012;21(3):285-95.
- 43 262. Kamper SJ, Apeldoorn AT, Chiarotto A, Smeets RJEM, Ostelo RWJG, Guzman J, et al.  
44 Multidisciplinary biopsychosocial rehabilitation for chronic low back pain: Cochrane systematic  
45 review and meta-analysis. *BMJ : British Medical Journal*. 2015;350:h444.
- 46 263. Korner M, Butof S, Muller C, Zimmermann L, Becker S, Bengel J. Interprofessional teamwork  
47 and team interventions in chronic care: A systematic review. *J Interprof Care*. 2016;30(1):15-28.
- 48 264. Leclerc BS, Blanchard L, Cantinotti M, Couturier Y, Gervais D, Lessard S, et al. The  
49 effectiveness of interdisciplinary teams in end-of-life palliative care: a systematic review of  
50 comparative studies. *Journal of palliative care*. 2014;30(1):44-54.
- 51 265. Lee JK, Slack MK, Martin J, Ehrman C, Chisholm-Burns M. Geriatric patient care by U.S.  
52 pharmacists in healthcare teams: systematic review and meta-analyses. *J Am Geriatr Soc*.  
53 2013;61(7):1119-27.
- 54  
55  
56  
57  
58  
59  
60

- 1  
2  
3 266. Mercedes A, Fairman P, Hogan L, Thomas R, Slyer JT. Effectiveness of structured  
4 multidisciplinary rounding in acute care units on length of stay and satisfaction of patients and staff:  
5 a quantitative systematic review. *JBIM database of systematic reviews and implementation reports*.  
6 2016;14(7):131-68.
- 7 267. Pillay B, Wootten AC, Crowe H, Corcoran N, Tran B, Bowden P, et al. The impact of  
8 multidisciplinary team meetings on patient assessment, management and outcomes in oncology  
9 settings: A systematic review of the literature. *Cancer treatment reviews*. 2015;42:56-72.
- 10 268. Reilly S, Planner C, Gask L, Hann M, Knowles S, Druss B, et al. Collaborative care approaches  
11 for people with severe mental illness. *Cochrane Database Syst Rev*. 2013(11):CD009531.
- 12 269. Schepman S, Hansen J, de Putter ID, Batenburg RS, de Bakker DH. The common  
13 characteristics and outcomes of multidisciplinary collaboration in primary health care: a systematic  
14 literature review. *Int J Integr Care*. 2015;15:e027.
- 15 270. Sharp WG, Volkert VM, Scahill L, McCracken CE, McElhanon B. A Systematic Review and  
16 Meta-Analysis of Intensive Multidisciplinary Intervention for Pediatric Feeding Disorders: How  
17 Standard Is the Standard of Care? *The Journal of pediatrics*. 2017;181:116-24.e4.
- 18 271. Wang SM, Hsiao LC, Ting IW, Yu TM, Liang CC, Kuo HL, et al. Multidisciplinary care in patients  
19 with chronic kidney disease: A systematic review and meta-analysis. *European journal of internal  
20 medicine*. 2015;26(8):640-5.
- 21 272. Yang GM, Neo SH, Lim SZ, Krishna LK. Effectiveness of Hospital Palliative Care Teams for  
22 Cancer Inpatients: A Systematic Review. *Journal of palliative medicine*. 2016;19(11):1156-65.
- 23 273. Chang AS, Berry A, Jones LJ, Sivasangari S. Specialist teams for neonatal transport to  
24 neonatal intensive care units for prevention of morbidity and mortality. *Cochrane Database Syst Rev*.  
25 2015(10):CD007485.
- 26 274. Goyder C, Atherton, H., Car, M., Heneghan, C. J. and Car, J. Email for clinical communication  
27 between healthcare professionals. *Cochrane Database of Systematic Reviews*. 2015.
- 28 275. Villa-Roel C, Nikel, T., Ospina, M., Voaklander, B., Campbell, S. and Rowe, B. H. Effectiveness  
29 of Educational Interventions to Increase Primary Care Follow-up for Adults Seen in the Emergency  
30 Department for Acute Asthma: A Systematic Review and Meta-analysis. *Academic emergency  
31 medicine : official journal of the Society for Academic Emergency Medicine*. 2015.
- 32 276. Walsh C, Siegler, E. L., Cheston, E., O'Donnell, H., Collins, S., Stein, D., Vawdrey, D. K.,  
33 Stetson, P. D. and Informatics Intervention Research, C. Provider-to-provider electronic  
34 communication in the era of meaningful use: a review of the evidence. *Journal of hospital medicine :  
35 an official publication of the Society of Hospital Medicine*. 2013.
- 36 277. Wu RC, Tran, K., Lo, V., O'Leary, K. J., Morra, D., Quan, S. D. and Perrier, L. Effects of clinical  
37 communication interventions in hospitals: a systematic review of information and communication  
38 technology adoptions for improved communication between clinicians. *International journal of  
39 medical informatics*. 2012.
- 40 278. Hesselink G, Schoonhoven L, Barach P, Spijker A, Gademan P, Kalkman C, et al. Improving  
41 patient handovers from hospital to primary care: a systematic review. *Ann Intern Med*.  
42 2012;157(6):417-28.
- 43 279. Luu NP, Pitts S, Petty B, Sawyer MD, Dennison-Himmelfarb C, Boonyasai RT, et al. Provider-  
44 to-Provider Communication during Transitions of Care from Outpatient to Acute Care: A Systematic  
45 Review. *J Gen Intern Med*. 2016;31(4):417-25.
- 46 280. Abraham J, Kannampallil T, Caskey RN, Kitsiou S. Emergency Department-Based Care  
47 Transitions for Pediatric Patients: A Systematic Review. *Pediatrics*. 2016;138(2):1-15.
- 48 281. Betz CL, O'Kane LS, Nehring WM, Lobo ML. Systematic review: Health care transition practice  
49 service models. *Nursing outlook*. 2016;64(3):229-43.
- 50 282. Bhawra J, Toulany A, Cohen E, Moore Hepburn C, Guttman A. Primary care interventions to  
51 improve transition of youth with chronic health conditions from paediatric to adult healthcare: a  
52 systematic review. *BMJ Open*. 2016;6(5):e011871.
- 53  
54  
55  
56  
57  
58  
59  
60



- 1  
2  
3 283. Clemente D, Leon L, Foster H, Minden K, Carmona L. Systematic review and critical appraisal  
4 of transitional care programmes in rheumatology. *Seminars in arthritis and rheumatism*.  
5 2016;46(3):372-9.
- 6 284. Embrett MG, Randall, G. E., Longo, C. J., Nguyen, T. and Mulvale, G. Effectiveness of Health  
7 System Services and Programs for Youth to Adult Transitions in Mental Health Care: A Systematic  
8 Review of Academic Literature. *Administration and policy in mental health*. 2015.
- 9 285. Findley MK, Cha E, Wong E, Faulkner MS. A Systematic Review of Transitional Care for  
10 Emerging Adults with Diabetes. *J Pediatr Nurs*. 2015;30(5):e47-62.
- 11 286. Kim H, Thyer BA. Does transitional care prevent older adults from rehospitalization? A  
12 review. *Journal of evidence-informed social work*. 2015;12(3):261-71.
- 13 287. Allen J, Hutchinson AM, Brown R, Livingston PM. Quality care outcomes following  
14 transitional care interventions for older people from hospital to home: a systematic review. *BMC*  
15 *Health Serv Res*. 2014;14:346.
- 16 288. Braet A, Weltens C, Sermeus W. Effectiveness of discharge interventions from hospital to  
17 home on hospital readmissions: a systematic review. *JBI database of systematic reviews and*  
18 *implementation reports*. 2016;14(2):106-73.
- 19 289. Branowicki PM, Vessey JA, Graham DA, McCabe MA, Clapp AL, Blaine K, et al. Meta-Analysis  
20 of Clinical Trials That Evaluate the Effectiveness of Hospital-Initiated Postdischarge Interventions on  
21 Hospital Readmission. *Journal for healthcare quality : official publication of the National Association*  
22 *for Healthcare Quality*. 2016.
- 23 290. Echevarria C, Brewin K, Horobin H, Bryant A, Corbett S, Steer J, et al. Early Supported  
24 Discharge/ Hospital At Home For Acute Exacerbation Of Chronic Obstructive Pulmonary Disease: A  
25 Review and Meta-Analysis. *COPD*. 2016;13(4):1-11.
- 26 291. Fearon P, Langhorne P. Services for reducing duration of hospital care for acute stroke  
27 patients. *Cochrane Database Syst Rev*. 2012(9):Cd000443.
- 28 292. Fox MT, Persaud M, Maimets I, Brooks D, O'Brien K, Tregunno D. Effectiveness of early  
29 discharge planning in acutely ill or injured hospitalized older adults: a systematic review and meta-  
30 analysis. *BMC Geriatr*. 2013;13:70.
- 31 293. Gonçalves-Bradley DC, Lannin NA, Clemson LM, Cameron ID, Shepperd S. Discharge planning  
32 from hospital. *The Cochrane Library*. 2016.
- 33 294. Guerin M, Grimmer, K. and Kumar, S. Community services' involvement in the discharge of  
34 older adults from hospital into the community. *International journal of integrated care*. 2013.
- 35 295. Loeffen EAH, te Poele EM, Tissing WJE, Boezen HM, de Bont ESJM. Very early discharge  
36 versus early discharge versus non-early discharge in children with cancer and febrile neutropenia.  
37 *Cochrane Database of Systematic Reviews*. 2016.
- 38 296. Meyer MJ, Teasell R, Thind A, Koval J, Speechley M. A Synthesis of Peer-Reviewed Literature  
39 on Team-Coordinated and Delivered Early Supported Discharge After Stroke. *Can J Neurol Sci*.  
40 2016;43(3):353-9.
- 41 297. Ospina MB, Mrklas K, Deuchar L, Rowe BH, Leigh R, Bhutani M, et al. A systematic review of  
42 the effectiveness of discharge care bundles for patients with COPD. *Thorax*. 2017;72(1):31-9.
- 43 298. Goncalves-Bradley DC, Iliffe S, Doll HA, Broad J, Gladman J, Langhorne P, et al. Early  
44 discharge hospital at home. *Cochrane Database Syst Rev*. 2017;6:Cd000356.
- 45 299. Lei Q, Wang X, Tan S, Xia X, Zheng H, Wu C. Fast-track programs versus traditional care in  
46 hepatectomy: a meta-analysis of randomized controlled trials. *Digestive surgery*. 2014;31(4-5):392-9.
- 47 300. Song W, Wang K, Zhang RJ, Dai QX, Zou SB. The enhanced recovery after surgery (ERAS)  
48 program in liver surgery: a meta-analysis of randomized controlled trials. *Springerplus*. 2016;5:207.
- 49 301. Wu SJ, Xiong XZ, Lu J, Cheng Y, Lin YX, Zhou RX, et al. Fast-Track Programs for Liver Surgery:  
50 A Meta-Analysis. *J Gastrointest Surg*. 2015;19(9):1640-52.
- 51 302. Zarea Gavgani V, Kazemi Majd F, Nosratnejad S, Golmohammadi A, Sadeghi-Bazargani H. The  
52 Efficacy of Written Information Intervention in Reduction of Hospital Re-admission Cost in Patients  
53 With Heart Failure; A Systematic Review and Meta-Analysis. *J Cardiovasc Thorac Res*. 2015;7(1):1-5.
- 54  
55  
56  
57  
58  
59  
60

- 1  
2  
3 303. Jones CE, Hollis RH, Wahl TS, Oriel BS, Itani KM, Morris MS, et al. Transitional care  
4 interventions and hospital readmissions in surgical populations: a systematic review. *American*  
5 *journal of surgery*. 2016;212(2):327-35.
- 6 304. Roper KL, Ballard J, Rankin W, Cardarelli R. Systematic Review of Ambulatory Transitional  
7 Care Management (TCM) Visits on Hospital 30-Day Readmission Rates. *American journal of medical*  
8 *quality : the official journal of the American College of Medical Quality*. 2015;32(1):19-26.
- 9 305. Brown HC, Smith, H. J., Mori, R. and Noma, H. Giving women their own case notes to carry  
10 during pregnancy. *Cochrane Database of Systematic Reviews*. 2015.
- 11 306. Hawley G, Janamian, T., Jackson, C. and Wilkinson, S. A. In a maternity shared-care  
12 environment, what do we know about the paper hand-held and electronic health record: a  
13 systematic literature review. *BMC pregnancy and childbirth*. 2014.
- 14 307. Boksmati N, Butler-Henderson K, Anderson K, Sahama T. The Effectiveness of SMS  
15 Reminders on Appointment Attendance: a Meta-Analysis. *J Med Syst*. 2016;40(4):90.
- 16 308. Guy R, Hocking, J., Wand, H., Stott, S., Ali, H. and Kaldor, J. How effective are short message  
17 service reminders at increasing clinic attendance? A meta-analysis and systematic review. *Health*  
18 *services research*. 2012.
- 19 309. McLean S, Gee M, Booth A, Salway S, Nancarrow S, Cobb M, et al. Targeting the Use of  
20 Reminders and Notifications for Uptake by Populations (TURNUP): a systematic review and evidence  
21 synthesis. *Health Services and delivery research*. 2014;34:1-184.
- 22 310. Harvey H, Reissland N, Mason J. Parental reminder, recall and educational interventions to  
23 improve early childhood immunisation uptake: A systematic review and meta-analysis. *Vaccine*.  
24 2015;33(25):2862-80.
- 25 311. Chapman SM, Wray J, Oulton K, Peters MJ. Systematic review of paediatric track and trigger  
26 systems for hospitalised children. *Resuscitation*. 2016;109:87-109.
- 27 312. Robinson JR, Huth H, Jackson GP. Review of information technology for surgical patient care.  
28 *J Surg Res*. 2016;203(1):121-39.
- 29 313. Liu Q, Abba K, Alejandria MM, Sinclair D, Balanag VM, Lansang MA. Reminder systems to  
30 improve patient adherence to tuberculosis clinic appointments for diagnosis and treatment.  
31 *Cochrane Database Syst Rev*. 2014(11):Cd006594.
- 32 314. Middleton P, Crowther CA. Reminder systems for women with previous gestational diabetes  
33 mellitus to increase uptake of testing for type 2 diabetes or impaired glucose tolerance. *Cochrane*  
34 *Database Syst Rev*. 2014(3):CD009578.
- 35 315. Riley P, Worthington HV, Clarkson JE, Beirne PV. Recall intervals for oral health in primary  
36 care patients. *Cochrane Database Syst Rev*. 2013(12):CD004346.
- 37 316. Fenerty SD, West C, Davis SA, Kaplan SG, Feldman SR. The effect of reminder systems on  
38 patients' adherence to treatment. *Patient Prefer Adherence*. 2012;6:127-35.
- 39 317. Shultz CGaH, H. L. The Use of Medical Scribes in Health Care Settings: A Systematic Review  
40 and Future Directions. *Journal of the American Board of Family Medicine : JABFM*. 2015.
- 41 318. North JC, Jordan KC, Metos J, Hurdle JF. Nutrition Informatics Applications in Clinical  
42 Practice: a Systematic Review. *AMIA Annu Symp Proc*. 2015;2015:963-72.
- 43 319. Paterson M, Kinnear M, Bond C, McKinstry B. A systematic review of electronic multi-  
44 compartment medication devices with reminder systems for improving adherence to self-  
45 administered medications. *The International journal of pharmacy practice*. 2017;25(3):185-94.
- 46 320. Sinnemaki J, Sihvo S, Isojarvi J, Blom M, Airaksinen M, Mantyla A. Automated dose  
47 dispensing service for primary healthcare patients: a systematic review. *Syst Rev*. 2013;2:1.
- 48 321. Watson SJ, Aldus CF, Bond C, Bhattacharya D. Systematic review of the health and societal  
49 effects of medication organisation devices. *BMC health services research*. 2016;16(1):202.
- 50 322. Mekonnen AB, Abebe TB, McLachlan AJ, Brien JA. Impact of electronic medication  
51 reconciliation interventions on medication discrepancies at hospital transitions: a systematic review  
52 and meta-analysis. *BMC medical informatics and decision making*. 2016.
- 53  
54  
55  
56  
57  
58  
59  
60

- 1  
2  
3 323. Ciciriello S, Johnston R.V., Osborne, R. H., Wicks, I., deKroo, T., Clerehan, R., O'Neill, C.,  
4 Buchbinder, R. Multimedia educational interventions for consumers about prescribed and over-the-  
5 counter medications. *Cochrane Database of Systematic Reviews*. 2013.
- 6 324. Irizarry T, DeVito Dabbs A, Curran CR. Patient Portals and Patient Engagement: A State of the  
7 Science Review. *J Med Internet Res*. 2015;17(6):e148.
- 8 325. Kruse CS, Bolton K, Freriks G. The Effect of Patient Portals on Quality Outcomes and Its  
9 Implications to Meaningful Use: A Systematic Review. *Journal of medical Internet research*.  
10 2015;17(2):e44.
- 11 326. Vest JR, Jung HY, Ostrovsky A, Das LT, McGinty GB. Image Sharing Technologies and  
12 Reduction of Imaging Utilization: A Systematic Review and Meta-analysis. *J Am Coll Radiol*.  
13 2015;12(12 Pt B):1371-9 e3.
- 14 327. Baysari MT, Lehnbohm EC, Li L, Hargreaves A, Day RO, Westbrook JI. The effectiveness of  
15 information technology to improve antimicrobial prescribing in hospitals: A systematic review and  
16 meta-analysis. *International journal of medical informatics*. 2016;92:15-34.
- 17 328. Charlier N, Zupancic N, Fieuws S, Denhaerynck K, Zaman B, Moons P. Serious games for  
18 improving knowledge and self-management in young people with chronic conditions: a systematic  
19 review and meta-analysis. *J Am Med Inform Assoc*. 2016;23(1):230-9.
- 20 329. Fleming TM, Cheek C, Merry SN, Thabrew H, Bridgman H, Stasiak K, et al. Serious games for  
21 the treatment or prevention of depression: A systematic review. *Revista de Psicopatología y*  
22 *Psicología Clínica*. 2014;19(3).
- 23 330. Finkelstein J, Knight, A., Marinopoulos, S., Gibbons, M. C., Berger, Z., Aboumatar, H., Wilson,  
24 R. F., Lau, B. D., Sharma, R. and Bass, E. B. Enabling patient-centered care through health information  
25 technology. Evidence report/technology assessment. 2012.
- 26 331. Liu L, Stroulia E, Nikolaidis I, Miguel-Cruz A, Rios Rincon A. Smart homes and home health  
27 monitoring technologies for older adults: A systematic review. *Int J Med Inform*. 2016;91:44-59.
- 28 332. Brzan PP, Rotman E, Pajnkihar M, Klanjsek P. Mobile Applications for Control and Self  
29 Management of Diabetes: A Systematic Review. *J Med Syst*. 2016;40(9):210.
- 30 333. Burns K, Keating P, Free C. A systematic review of randomised control trials of sexual health  
31 interventions delivered by mobile technologies. *BMC Public Health*. 2016;16(1):778.
- 32 334. Connelly J, Kirk, A., Masthoff, J. and Macrury, S. The use of technology to promote physical  
33 activity in Type 2 diabetes management: a systematic review. *Diabetic medicine : a journal of the*  
34 *British Diabetic Association*. 2013.
- 35 335. Cui M, Wu X, Mao J, Wang X, Nie M. T2DM Self-Management via Smartphone Applications:  
36 A Systematic Review and Meta-Analysis. *PLoS One*. 2016;11(11):e0166718.
- 37 336. de Ridder M, Kim J, Jing Y, Khadra M, Nanan R. A systematic review on incentive-driven  
38 mobile health technology: As used in diabetes management. *J Telemed Telecare*. 2017;23(1):26-35.
- 39 337. El-Gayar O, Timsina P, Nawar N, Eid W. A systematic review of IT for diabetes self-  
40 management: are we there yet? *International journal of medical informatics*. 2013;82(8):637-52.
- 41 338. Finch L, Janda M, Loeschler LJ, Hacker E. Can skin cancer prevention be improved through  
42 mobile technology interventions? A systematic review. *Prev Med*. 2016;90:121-32.
- 43 339. Flores Mateo G, Granado-Font E, Ferré-Grau C, Montaña-Carreras X. Mobile Phone Apps to  
44 Promote Weight Loss and Increase Physical Activity: A Systematic Review and Meta-Analysis. *Journal*  
45 *of medical Internet research*. 2015;17(11):e253.
- 46 340. Fowler LA, Holt SL, Joshi D. Mobile technology-based interventions for adult users of alcohol:  
47 A systematic review of the literature. *Addictive behaviors*. 2016;62:25-34.
- 48 341. Hui CY, Walton R, McKinstry B, Jackson T, Parker R, Pinnock H. The use of mobile applications  
49 to support self-management for people with asthma: a systematic review of controlled studies to  
50 identify features associated with clinical effectiveness and adherence. *Journal of the American*  
51 *Medical Informatics Association : JAMIA*. 2016;24(3):619-32.
- 52 342. Lee J, Piao M, Byun A, Kim J. A Systematic Review and Meta-Analysis of Intervention for  
53 *Pediatric Obesity Using Mobile Technology*. *Stud Health Technol Inform*. 2016;225:491-4.
- 54  
55  
56  
57  
58  
59  
60

- 1  
2  
3 343. L'Engle KL, Mangone ER, Parcesepe AM, Agarwal S, Ippoliti NB. Mobile Phone Interventions  
4 for Adolescent Sexual and Reproductive Health: A Systematic Review. *Pediatrics*. 2016;138(3):1-16.  
5 344. McMillan KA, Kirk A, Hewitt A, MacRury S. A Systematic and Integrated Review of Mobile-  
6 Based Technology to Promote Active Lifestyles in People With Type 2 Diabetes. *J Diabetes Sci*  
7 *Technol*. 2017;11(2):299-307.  
8 345. Nour M, Chen J, Allman-Farinelli M. Efficacy and External Validity of Electronic and Mobile  
9 Phone-Based Interventions Promoting Vegetable Intake in Young Adults: Systematic Review and  
10 Meta-Analysis. *J Med Internet Res*. 2016;18(4):e58.  
11 346. Park C, Kim G, Patel I, Chang J, Tan X. Improving adherence to acne treatment: the emerging  
12 role of application software. *Clin Cosmet Investig Dermatol*. 2014;7:65-72.  
13 347. Park LG, Beatty A, Stafford Z, Whooley MA. Mobile Phone Interventions for the Secondary  
14 Prevention of Cardiovascular Disease. *Prog Cardiovasc Dis*. 2016;58(6):639-50.  
15 348. Smith C, Gold, J., Ngo, T. D., Sumpter, C. and Free, C. Mobile phone-based interventions for  
16 improving contraception use. *Cochrane Database of Systematic Reviews*. 2015.  
17 349. Stephens J, Allen J. Mobile phone interventions to increase physical activity and reduce  
18 weight: a systematic review. *J Cardiovasc Nurs*. 2013;28(4):320-9.  
19 350. Whittaker R, McRobbie H, Bullen C, Rodgers A, Gu Y. Mobile phone-based interventions for  
20 smoking cessation. *Cochrane Database Syst Rev*. 2016;4:CD006611.  
21 351. Zhao J, Freeman B, Li M. Can Mobile Phone Apps Influence People's Health Behavior  
22 Change? An Evidence Review. *J Med Internet Res*. 2016;18(11):e287.  
23 352. Whitehead L, Seaton P. The Effectiveness of Self-Management Mobile Phone and Tablet  
24 Apps in Long-term Condition Management: A Systematic Review. *Journal of medical Internet*  
25 *research*. 2016;18(5):e97.  
26 353. Ganguli A, Clewell J, Shillington AC. The impact of patient support programs on adherence,  
27 clinical, humanistic, and economic patient outcomes: a targeted systematic review. *Patient Prefer*  
28 *Adherence*. 2016;10:711-25.  
29 354. Maher CA, Lewis LK, Ferrar K, Marshall S, De Bourdeaudhuij I, Vandelanotte C. Are health  
30 behavior change interventions that use online social networks effective? A systematic review.  
31 *Journal of medical Internet research*. 2014;16(2):e40.  
32 355. Smailhodzic E, Hooijsma W, Boonstra A, Langley DJ. Social media use in healthcare: A  
33 systematic review of effects on patients and on their relationship with healthcare professionals.  
34 *BMC Health Serv Res*. 2016;16:442.  
35 356. Välimäki M, Athanasopoulou C, Lahti M, Adams CE. Effectiveness of Social Media  
36 Interventions for People With Schizophrenia: A Systematic Review and Meta-Analysis. *Journal of*  
37 *medical Internet research*. 2016;18(4):e92.  
38 357. Dennis SM, Harris, M., Lloyd, J., Powell Davies, G., Faruqi, N. and Zwar, N. Do people with  
39 existing chronic conditions benefit from telephone coaching? A rapid review. *Australian health*  
40 *review : a publication of the Australian Hospital Association*. 2013.  
41 358. Sawesi S, Rashrash M, Phalakornkule K, Carpenter JS, Jones JF. The Impact of Information  
42 Technology on Patient Engagement and Health Behavior Change: A Systematic Review of the  
43 Literature. *JMIR medical informatics*. 2016;4(1):e1.  
44 359. O'Rourke L, Humphris G, Baldacchino A. Electronic communication based interventions for  
45 hazardous young drinkers: A systematic review. *Neuroscience and biobehavioral reviews*.  
46 2016;68:880-90.  
47 360. Arambepola C, Ricci-Cabello I, Manikavasagam P, Roberts N, French DP, Farmer A. The  
48 Impact of Automated Brief Messages Promoting Lifestyle Changes Delivered Via Mobile Devices to  
49 People with Type 2 Diabetes: A Systematic Literature Review and Meta-Analysis of Controlled Trials.  
50 *Journal of medical Internet research*. 2016;18(4):e86.  
51 361. Badawy SM, Kuhns LM. Economic Evaluation of Text-Messaging and Smartphone-Based  
52 Interventions to Improve Medication Adherence in Adolescents with Chronic Health Conditions: A  
53 Systematic Review. *JMIR mHealth and uHealth*. 2016;4(4):e121.  
54  
55  
56  
57  
58  
59  
60



- 1  
2  
3 362. Posadzki P, Mastellos N, Ryan R, Gunn LH, Felix LM, Pappas Y, et al. Automated telephone  
4 communication systems for preventive healthcare and management of long-term conditions.  
5 Cochrane Database Syst Rev. 2016;12:CD009921.  
6  
7 363. Nieuwboer CC, Fukkink RG, Hermanns JM. Peer and professional parenting support on the  
8 Internet: a systematic review. *Cyberpsychol Behav Soc Netw*. 2013;16(7):518-28.  
9  
10 364. Gentry S, Hmmt van-Velthoven, M., Car, L. T., Car, J. Telephone delivered interventions for  
11 reducing morbidity and mortality in people with HIV infection. *Cochrane Database of Systematic  
12 Reviews*. 2013.  
13  
14 365. Hvidt EA, Ploug, T. and Holm, S. The impact of telephone crisis services on suicidal users: a  
15 systematic review of the past 45 years. *Mental Health Review Journal*. 2016;21(2):141-60.  
16  
17 366. Inglis SC, Clark RA, Dierckx R, Prieto-Merino D, Cleland JG. Structured telephone support or  
18 non-invasive telemonitoring for patients with heart failure. *Cochrane Database Syst Rev*.  
19 2015(10):CD007228.  
20  
21 367. Jayakody A, Bryant J, Carey M, Hobden B, Dodd N, Sanson-Fisher R. Effectiveness of  
22 interventions utilising telephone follow up in reducing hospital readmission within 30 days for  
23 individuals with chronic disease: a systematic review. *BMC health services research*. 2016.  
24  
25 368. Lavender T, Richens Y, Milan SJ, Smyth RM, Dowswell T. Telephone support for women  
26 during pregnancy and the first six weeks postpartum. *Cochrane Database Syst Rev*.  
27 2013(7):CD009338.  
28  
29 369. Lins S, Hayder-Beichel D, Rucker G, Motschall E, Antes G, Meyer G, et al. Efficacy and  
30 experiences of telephone counselling for informal carers of people with dementia. *Cochrane  
31 Database Syst Rev*. 2014(9):CD009126.  
32  
33 370. Stead LF, Hartmann-Boyce J, Perera R, Lancaster T. Telephone counselling for smoking  
34 cessation. *Cochrane Database Syst Rev*. 2013(8):CD002850.  
35  
36 371. Yasmin F, Banu B, Zakir SM, Sauerborn R, Ali L, Souares A. Positive influence of short  
37 message service and voice call interventions on adherence and health outcomes in case of chronic  
38 disease care: a systematic review. *BMC Med Inform Decis Mak*. 2016;16:46.  
39  
40 372. Zhou M, Holden L, Bedard G, Zeng L, Lam H, Chu D, et al. The utilization of telephone follow-  
41 up in the advanced cancer population: a review of the literature. *Journal of comparative  
42 effectiveness research*. 2012;1(6):509-17.  
43  
44 373. Vargas G, Cajita MI, Whitehouse E, Han HR. Use of Short Messaging Service for Hypertension  
45 Management: A Systematic Review. *The Journal of cardiovascular nursing*. 2016.  
46  
47 374. Aardoom JJ, Dingemans AE, Spinhoven P, Van Furth EF. Treating eating disorders over the  
48 internet: a systematic review and future research directions. *Int J Eat Disord*. 2013;46(6):539-52.  
49  
50 375. Annaim A, Lassiter M, Viera AJ, Ferris M. Interactive media for parental education on  
51 managing children chronic condition: a systematic review of the literature. *BMC pediatrics*.  
52 2015;15(1):201.  
53  
54 376. Beishuizen CR, Stephan BC, van Gool WA, Brayne C, Peters RJ, Andrieu S, et al. Web-Based  
55 Interventions Targeting Cardiovascular Risk Factors in Middle-Aged and Older People: A Systematic  
56 Review and Meta-Analysis. *Journal of medical Internet research*. 2016;18(3):e55.  
57  
58 377. Brijnath B, Protheroe J, Mahtani KR, Antoniadou J. Do Web-based Mental Health Literacy  
59 Interventions Improve the Mental Health Literacy of Adult Consumers? Results From a Systematic  
60 Review. *J Med Internet Res*. 2016;18(6):e165.  
378. Brown M, Glendenning A, Hoon AE, John A. Effectiveness of Web-Delivered Acceptance and  
Commitment Therapy in Relation to Mental Health and Well-Being: A Systematic Review and Meta-  
Analysis. *Journal of medical Internet research*. 2016;18(8):e221.  
379. Chan JY, Hirai, H. W. and Tsoi, K. K. Can computer-assisted cognitive remediation improve  
employment and productivity outcomes of patients with severe mental illness? A meta-analysis of  
prospective controlled trials. *Journal of psychiatric research*. 2015.  
380. Chebli JL, Blaszczynski A, Gainsbury SM. Internet-Based Interventions for Addictive  
Behaviours: A Systematic Review. *Journal of gambling studies*. 2016;32(4):1279-304.

- 1  
2  
3 381. Cotter AP, Durant N, Agne AA, Cherrington AL. Internet interventions to support lifestyle  
4 modification for diabetes management: a systematic review of the evidence. *J Diabetes*  
5 *Complications*. 2014;28(2):243-51.
- 6 382. de Jong CC, Ros WJ, Schrijvers G. The effects on health behavior and health outcomes of  
7 Internet-based asynchronous communication between health providers and patients with a chronic  
8 condition: a systematic review. *Journal of medical Internet research*. 2014;16(1):e19.
- 9 383. Dettore D, Pozza A, Andersson G. Efficacy of technology-delivered cognitive behavioural  
10 therapy for OCD versus control conditions, and in comparison with therapist-administered CBT:  
11 meta-analysis of randomized controlled trials. *Cogn Behav Ther*. 2015;44(3):190-211.
- 12 384. Devi R, Singh SJ, Powell J, Fulton EA, Igbinedion E, Rees K. Internet-based interventions for  
13 the secondary prevention of coronary heart disease. *Cochrane Database Syst Rev*.  
14 2015(12):CD009386.
- 15 385. Dolemeier R, Tietjen A, Kersting A, Wagner B. Internet-based interventions for eating  
16 disorders in adults: a systematic review. *BMC Psychiatry*. 2013;13:207.
- 17 386. Fish J, Brimson J, Lynch S. Mindfulness Interventions Delivered by Technology Without  
18 Facilitator Involvement: What Research Exists and What Are the Clinical Outcomes? *Mindfulness*.  
19 2016;7(5):1011-23.
- 20 387. Foster C, Richards, J., Thorogood, M., Hillsdon, M. Remote and web 2.0 interventions for  
21 promoting physical activity. *Cochrane Database of Systematic Reviews*. 2013.
- 22 388. Garg S, Garg D, Turin TC, Chowdhury MF. Web-Based Interventions for Chronic Back Pain: A  
23 Systematic Review. *Journal of medical Internet research*. 2016;18(7):e139.
- 24 389. Graham AL, Carpenter KM, Cha S, Cole S, Jacobs MA, Raskob M, et al. Systematic review and  
25 meta-analysis of Internet interventions for smoking cessation among adults. *Substance abuse and*  
26 *rehabilitation*. 2016.
- 27 390. Grist RaC, K. Computerised Cognitive Behavioural Therapy for Common Mental Health  
28 Disorders, What Works, for Whom Under What Circumstances? A Systematic Review and Meta-  
29 analysis. *Journal of contemporary psychotherapy*. 2013.
- 30 391. Hidalgo-Mazzei D, Mateu A, Reinares M, Matic A, Vieta E, Colom F. Internet-based  
31 psychological interventions for bipolar disorder: Review of the present and insights into the future.  
32 *Journal of affective disorders*. 2015;188:1-13.
- 33 392. Hou SI, Charlery SA, Roberson K. Systematic literature review of Internet interventions  
34 across health behaviors. *Health Psychol Behav Med*. 2014;2(1):455-81.
- 35 393. Joo JY. Effectiveness of Web-Based Interventions for Managing Diabetes in Korea.  
36 *Computers, informatics, nursing : CIN*. 2016;34(12):587-600.
- 37 394. Kauppi K, Välimäki, M, Hätönen, H.M., Kuosmanen, L.M., Warwick-Smith, K. Information and  
38 communication technology based prompting for treatment compliance for people with serious  
39 mental illness. *Cochrane Database of Systematic Reviews*. 2014.
- 40 395. Kim AR, Park HA. Web-based Self-management Support Interventions for Cancer Survivors:  
41 A Systematic Review and Meta-analyses. *Studies in health technology and informatics*.  
42 2015;216:142-7.
- 43 396. Kreuze E, Jenkins C, Gregoski M, York J, Mueller M, Lamis DA, et al. Technology-enhanced  
44 suicide prevention interventions: A systematic review of the current state of the science. *Journal of*  
45 *telemedicine and telecare*. 2016;23(6):605-17.
- 46 397. L CaD, C. Effectiveness of web-based psychological interventions for depression: a meta-  
47 analysis. *International Journal of Mental Health and Addiction*. 2013.
- 48 398. Lai MH, Maniam T, Chan LF, Ravindran AV. Caught in the web: a review of web-based suicide  
49 prevention. *Journal of medical Internet research*. 2014;16(1):e30.
- 50 399. Lau Y, Htun TP, Wong SN, Tam WS, Klainin-Yobas P. Efficacy of Internet-Based Self-  
51 Monitoring Interventions on Maternal and Neonatal Outcomes in Perinatal Diabetic Women: A  
52 Systematic Review and Meta-Analysis. *Journal of medical Internet research*. 2016;18(8):e220.
- 53  
54  
55  
56  
57  
58  
59  
60



- 1  
2  
3 400. Lee EW, Denison FC, Hor K, Reynolds RM. Web-based interventions for prevention and  
4 treatment of perinatal mood disorders: a systematic review. *BMC pregnancy and childbirth*.  
5 2016;16(1):38.  
6  
7 401. Noh D, Park YS, Oh EG. Effectiveness of Telephone-Delivered Interventions Following Suicide  
8 Attempts: A Systematic Review. *Archives of psychiatric nursing*. 2016;30(1):114-9.  
9 402. Olthuis JV, Watt MC, Bailey K, Hayden JA, Stewart SH. Therapist-supported Internet cognitive  
10 behavioural therapy for anxiety disorders in adults. *Cochrane Database Syst Rev*. 2016;3:CD011565.  
11 403. Pal K, Eastwood SV, Michie S, Farmer AJ, Barnard ML, Peacock R, et al. Computer-based  
12 diabetes self-management interventions for adults with type 2 diabetes mellitus. *Cochrane Database*  
13 *Syst Rev*. 2013(3):CD008776.  
14 404. Păsărelu CR, Andersson G, Bergman Nordgren L, Dobrea A. Internet-delivered  
15 transdiagnostic and tailored cognitive behavioral therapy for anxiety and depression: a systematic  
16 review and meta-analysis of randomized controlled trials. *Cognitive behaviour therapy*.  
17 2016;46(1):1-28.  
18 405. Perry Y, Werner-Seidler A, Calear AL, Christensen H. Web-Based and Mobile Suicide  
19 Prevention Interventions for Young People: A Systematic Review. *J Can Acad Child Adolesc*  
20 *Psychiatry*. 2016;25(2):73-9.  
21 406. Podina IR, Mogoase C, David D, Szentagotai A, Dobrea A. A meta-analysis on the efficacy of  
22 technology mediated CBT for anxious children and adolescents. *Journal of Rational-Emotive &*  
23 *Cognitive-Behavior Therapy*. 2016;34(1).  
24 407. Ramdoss S, Machalicek W, Rispoli M, Mulloy A, Lang R, O'Reilly M. Computer-based  
25 interventions to improve social and emotional skills in individuals with autism spectrum disorders: a  
26 systematic review. *Dev Neurorehabil*. 2012;15(2):119-35.  
27 408. Reyes-Portillo JA, Mufson L, Greenhill LL, Gould MS, Fisher PW, Tarlow N, et al. Web-Based  
28 Interventions for Youth Internalizing Problems: A Systematic Review. *Journal of the American*  
29 *Academy of Child and Adolescent Psychiatry*. 2014;53(12):1254-70.e5.  
30 409. Richards J, Thorogood M, Hillsdon M, Foster C. Face-to-face versus remote and web 2.0  
31 interventions for promoting physical activity. *Cochrane Database Syst Rev*. 2013(9):CD010393.  
32 410. Saddichha S, Al-Desouki M, Lamia A, Linden IA, Krausz M. Online interventions for  
33 depression and anxiety - a systematic review. *Health Psychol Behav Med*. 2014;2(1):841-81.  
34 411. Sander L, Rausch L, Baumeister H. Effectiveness of Internet-Based Interventions for the  
35 Prevention of Mental Disorders: A Systematic Review and Meta-Analysis. *JMIR mental health*.  
36 2016;3(3):e38.  
37 412. Schlegl S, Bürger C, Schmidt L, Herbst N, Voderholzer U. The Potential of Technology-Based  
38 Psychological Interventions for Anorexia and Bulimia Nervosa: A Systematic Review and  
39 Recommendations for Future Research. *Journal of medical Internet research*. 2015;17(3):e85.  
40 413. Sherrington A, Newham JJ, Bell R, Adamson A, McColl E, Araujo-Soares V. Systematic review  
41 and meta-analysis of internet-delivered interventions providing personalized feedback for weight  
42 loss in overweight and obese adults. *Obes Rev*. 2016;17(6):541-51.  
43 414. Sijbrandij M, Kunovski I, Cuijpers P. Effectiveness of Internet-Delivered Cognitive Behavioral  
44 Therapy for Posttraumatic Stress Disorder: A Systematic Review and Meta-Analysis. *Depress Anxiety*.  
45 2016;33(9):783-91.  
46 415. Spijkerman MPJ, Pots WTM, Bohlmeijer ET. Effectiveness of online mindfulness-based  
47 interventions in improving mental health: A review and meta-analysis of randomised controlled  
48 trials. *Clinical Psychology Review*. 2016;45:102-14.  
49 416. Stelfefon M, Chaney B, Barry AE, Chavarria E, Tennant B, Walsh-Childers K, et al. Web 2.0  
50 chronic disease self-management for older adults: a systematic review. *Journal of medical Internet*  
51 *research*. 2013;15(2):e35.  
52 417. Taylor GMJ, Dalili MN, Semwal M, Civljak M, Sheikh A, Car J. Internet-based interventions for  
53 smoking cessation. *Cochrane Database Syst Rev*. 2017;9:CD007078.  
54  
55  
56  
57  
58  
59  
60

- 1  
2  
3 418. Twomey C, O'Reilly G. Effectiveness of a freely available computerised cognitive behavioural  
4 therapy programme (MoodGYM) for depression: Meta-analysis. *Aust N Z J Psychiatry.*  
5 2017;51(3):260-9.  
6  
7 419. Ye YY, Zhang YF, Chen J, Liu J, Li XJ, Liu YZ, et al. Internet-Based Cognitive Behavioral Therapy  
8 for Insomnia (ICBT-i) Improves Comorbid Anxiety and Depression-A Meta-Analysis of Randomized  
9 Controlled Trials. *PLoS One.* 2015;10(11):e0142258.  
10  
11 420. Zachariae R, Lyby MS, Ritterband LM, O'Toole MS. Efficacy of internet-delivered cognitive-  
12 behavioral therapy for insomnia - A systematic review and meta-analysis of randomized controlled  
13 trials. *Sleep medicine reviews.* 2015;30:1-10.  
14  
15 421. Eccleston C FE, Craig L, Duggan JB, Rosser BA, Keogh E. Psychological therapies  
16 (Internet?delivered) for the management of chronic pain in adults. *Cochrane Database of Systematic  
17 Reviews.* 2014.  
18  
19 422. Wootton BM. Remote cognitive-behavior therapy for obsessive-compulsive symptoms: A  
20 meta-analysis. *Clinical Psychology Review.* 2016;43:103-13.  
21  
22 423. Hall N, Boisvert M, Steele R. Telepractice in the assessment and treatment of individuals  
23 with aphasia: a systematic review. *Int J Telerehabil.* 2013;5(1):27-38.  
24  
25 424. Meyer B, Atherton H, Sawmynaden P, Car J. Email for communicating results of diagnostic  
26 medical investigations to patients. *Cochrane Database Syst Rev.* 2012(8):Cd007980.  
27  
28 425. Sawmynaden P, Atherton H, Majeed A, Car J. Email for the provision of information on  
29 disease prevention and health promotion. *Cochrane Database Syst Rev.* 2012;11:CD007982.  
30  
31 426. Atherton H, Sawmynaden, P., Sheikh, A., Majeed, A., Car, J. Email for clinical communication  
32 between patients/caregivers and healthcare professionals. *Cochrane Database of Systematic  
33 Reviews.* 2012.  
34  
35 427. de Jongh T, Gurol-Urganci I, Vodopivec-Jamsek V, Car J, Atun R. Mobile phone messaging for  
36 facilitating self-management of long-term illnesses. *Cochrane Database Syst Rev.* 2012;12:CD007459.  
37  
38 428. Ershad Sarabi R, Sadoughi F, Jamshidi Orak R, Bahaadinbeigy K. The Effectiveness of Mobile  
39 Phone Text Messaging in Improving Medication Adherence for Patients with Chronic Diseases: A  
40 Systematic Review. *Iran Red Crescent Med J.* 2016;18(5):e25183.  
41  
42 429. Finitis DJ, Pellowski JA, Johnson BT. Text message intervention designs to promote  
43 adherence to antiretroviral therapy (ART): a meta-analysis of randomized controlled trials. *PLoS One.*  
44 2014;9(2):e88166.  
45  
46 430. Head KJ, Noar SM, Iannarino NT, Grant Harrington N. Efficacy of text messaging-based  
47 interventions for health promotion: a meta-analysis. *Social science & medicine (1982).* 2013;97:41-8.  
48  
49 431. Scott-Sheldon LA, Lantini R, Jennings EG, Thind H, Rosen RK, Salmoirago-Blotcher E, et al.  
50 Text Messaging-Based Interventions for Smoking Cessation: A Systematic Review and Meta-Analysis.  
51 *JMIR mHealth and uHealth.* 2016;4(2):e49.  
52  
53 432. Siopis G, Chey, T. and Allman-Farinelli, M. A systematic review and meta-analysis of  
54 interventions for weight management using text messaging. *Journal of human nutrition and dietetics  
55 : the official journal of the British Dietetic Association.* 2014.  
56  
57 433. Thakkar J, Kurup R, Laba TL, Santo K, Thiagalingam A, Rodgers A, et al. Mobile Telephone  
58 Text Messaging for Medication Adherence in Chronic Disease: A Meta-analysis. *JAMA Intern Med.*  
59 2016;176(3):340-9.  
60  
61 434. Vodopivec-Jamsek V, de Jongh T, Gurol-Urganci I, Atun R, Car J. Mobile phone messaging for  
62 preventive health care. *Cochrane Database Syst Rev.* 2012;12:CD007457.  
63  
64 435. Wald DS, Butt S, Bestwick JP. One-way versus two-way text messaging on improving  
65 medication adherence: meta-analysis of randomized trials. *The American journal of medicine.*  
66 2015;128(10):1139.e1-5.  
67  
68 436. Watson T, Simpson S, Hughes C. Text messaging interventions for individuals with mental  
69 health disorders including substance use: A systematic review. *Psychiatry research.* 2016;243:255-  
70 62.

- 1  
2  
3 437. Gurol-Urganci I, de Jongh, T., Vodopivec-Jamsek, V., Atun, R. and Car, J. Mobile phone  
4 messaging reminders for attendance at healthcare appointments. *Cochrane Database of Systematic*  
5 *Reviews*. 2013.
- 6 438. Direito A, Carraça E, Rawstorn J, Whittaker R, Maddison R. mHealth Technologies to  
7 Influence Physical Activity and Sedentary Behaviors: Behavior Change Techniques, Systematic  
8 Review and Meta-Analysis of Randomized Controlled Trials. *Annals of behavioral medicine : a*  
9 *publication of the Society of Behavioral Medicine*. 2016;51(2):226-39.
- 10 439. Lin H, Wu X. Intervention strategies for improving patient adherence to follow-up in the era  
11 of mobile information technology: a systematic review and meta-analysis. *PLoS One*.  
12 2014;9(8):e104266.
- 13 440. Alwashmi M, Hawboldt J, Davis E, Marra C, Gamble JM, Abu Ashour W. The Effect of  
14 Smartphone Interventions on Patients With Chronic Obstructive Pulmonary Disease Exacerbations: A  
15 Systematic Review and Meta-Analysis. *JMIR mHealth and uHealth*. 2016;4(3):e105.
- 16 441. Braun R, Catalani C, Wimbush J, Israelski D. Community health workers and mobile  
17 technology: a systematic review of the literature. *PLoS One*. 2013;8(6):e65772.
- 18 442. Afshin A, Babalola D, McLean M, Yu Z, Ma W, Chen CY, et al. Information Technology and  
19 Lifestyle: A Systematic Evaluation of Internet and Mobile Interventions for Improving Diet, Physical  
20 Activity, Obesity, Tobacco, and Alcohol Use. *Journal of the American Heart Association*. 2016;5(9).
- 21 443. Barello S, Triberti S, Graffigna G, Libreri C, Serino S, Hibbard J, et al. eHealth for Patient  
22 Engagement: A Systematic Review. *Front Psychol*. 2015;6:2013.
- 23 444. Berrouiguet S, Baca-García E, Brandt S, Walter M, Courtet P. Fundamentals for Future  
24 Mobile-Health (mHealth): A Systematic Review of Mobile Phone and Web-Based Text Messaging in  
25 Mental Health. *Journal of medical Internet research*. 2016;18(6):e135.
- 26 445. Cajita MI, Gleason KT, Han HR. A Systematic Review of mHealth-Based Heart Failure  
27 Interventions. *The Journal of cardiovascular nursing*. 2016;31(3):E10-22.
- 28 446. Capurro D, Ganzinger M, Perez-Lu J, Knaup P. Effectiveness of eHealth interventions and  
29 information needs in palliative care: a systematic literature review. *Journal of medical Internet*  
30 *research*. 2014;16(3):e72.
- 31 447. Chen YR, Schulz PJ. The Effect of Information Communication Technology Interventions on  
32 Reducing Social Isolation in the Elderly: A Systematic Review. *J Med Internet Res*. 2016;18(1):e18.
- 33 448. Conway N, Webster C, Smith B, Wake D. eHealth and the use of individually tailored  
34 information: A systematic review. *Health informatics journal*. 2016.
- 35 449. Free C, Phillips G, Watson L, Galli L, Felix L, Edwards P, et al. The effectiveness of mobile-  
36 health technologies to improve health care service delivery processes: a systematic review and  
37 meta-analysis. *PLoS Med*. 2013;10(1):e1001363.
- 38 450. Gregersen TL, Green A, Frausing E, Ringbaek T, Brondum E, Suppli Ulrik C. Do telemedical  
39 interventions improve quality of life in patients with COPD? A systematic review. *International*  
40 *journal of chronic obstructive pulmonary disease*. 2016;11:809-22.
- 41 451. Jackson BD, Gray K, Knowles SR, De Cruz P. EHealth Technologies in Inflammatory Bowel  
42 Disease: A Systematic Review. *Journal of Crohn's & colitis*. 2016;10(9):1103-21.
- 43 452. Jackson D, Roberts G, Wu ML, Ford R, Doyle C. A systematic review of the effect of  
44 telephone, internet or combined support for carers of people living with Alzheimer's, vascular or  
45 mixed dementia in the community. *Archives of gerontology and geriatrics*. 2016;66:218-36.
- 46 453. Koblauch H, Reinhardt SM, Lissau W, Jensen PL. The effect of telepsychiatric modalities on  
47 reduction of readmissions in psychiatric settings: A systematic review. *Journal of telemedicine and*  
48 *telecare*. 2016.
- 49 454. Lin MH, Yuan WL, Huang TC, Zhang HF, Mai JT, Wang JF. The clinical effectiveness of  
50 telemedicine for chronic heart failure: A systematic review and meta-analysis. *Minerva medica*.  
51 2016.
- 52  
53  
54  
55  
56  
57  
58  
59  
60

- 1  
2  
3 455. Naslund JA, Marsch LA, McHugo GJ, Bartels SJ. Emerging mHealth and eHealth interventions  
4 for serious mental illness: a review of the literature. *Journal of mental health (Abingdon, England)*.  
5 2015;24(5):1-12.  
6  
7 456. Omaki E, Rizzutti N, Shields W, Zhu J, McDonald E, Stevens MW, et al. A systematic review of  
8 technology-based interventions for unintentional injury prevention education and behaviour change.  
9 *Injury prevention : journal of the International Society for Child and Adolescent Injury Prevention*.  
10 2017;23(2):138-46.  
11  
12 457. Schnall R, Travers J, Rojas M, Carballo-Diéguez A. eHealth interventions for HIV prevention in  
13 high-risk men who have sex with men: a systematic review. *Journal of medical Internet research*.  
14 2014;16(5):e134.  
15  
16 458. Seo DC, Niu J. Evaluation of Internet-Based Interventions on Waist Circumference Reduction:  
17 A Meta-Analysis. *Journal of medical Internet research*. 2015;17(7):e181.  
18  
19 459. Su D, Zhou J, Kelley MS, Michaud TL, Siahpush M, Kim J, et al. Does telemedicine improve  
20 treatment outcomes for diabetes? A meta-analysis of results from 55 randomized controlled trials.  
21 *Diabetes Research & Clinical Practice*. 2016;116:136-48.  
22  
23 460. van der Meij E, Anema JR, Otten RH, Huirne JA, Schaafsma FG. The Effect of Perioperative E-  
24 Health Interventions on the Postoperative Course: A Systematic Review of Randomised and Non-  
25 Randomised Controlled Trials. *PLoS One*. 2016;11(7):e0158612.  
26  
27 461. Zhao J, Zhai YK, Zhu WJ, Sun DX. Effectiveness of Telemedicine for Controlling Asthma  
28 Symptoms: A Systematic Review and Meta-analysis. *Telemedicine journal and e-health : the official*  
29 *journal of the American Telemedicine Association*. 2014;21(6):484-92.  
30  
31 462. Hobson EV, Baird WO, Cooper CL, Mawson S, Shaw PJ, McDermott CJ. Using technology to  
32 improve access to specialist care in amyotrophic lateral sclerosis: A systematic review. *Amyotrophic*  
33 *lateral sclerosis & frontotemporal degeneration*. 2016;17(5-6):1-12.  
34  
35 463. Lam LT, Lam MK. eHealth Intervention for Problematic Internet Use (PIU). *Current psychiatry*  
36 *reports*. 2016;18(12):107.  
37  
38 464. Su D, McBride C, Zhou J, Kelley MS. Does nutritional counseling in telemedicine improve  
39 treatment outcomes for diabetes? A systematic review and meta-analysis of results from 92 studies.  
40 *Journal of telemedicine and telecare*. 2015;22(6):333-47.  
41  
42 465. Amatya B, Galea MP, Kesselring J, Khan F. Effectiveness of telerehabilitation interventions in  
43 persons with multiple sclerosis: A systematic review. *Multiple sclerosis and related disorders*.  
44 2015;4(4):358-69.  
45  
46 466. Budrionis A, Augestad KM, Patel HR, Bellika JG. An evaluation framework for defining the  
47 contributions of telestration in surgical telementoring. *Interactive journal of medical research*.  
48 2013;2(2):e14.  
49  
50 467. He T, Liu X, Li Y, Wu Q, Liu M, Yuan H. Remote home management for chronic kidney  
51 disease: A systematic review. *Journal of telemedicine and telecare*. 2016;23(1):3-13.  
52  
53 468. Kew KM, Cates CJ. Remote versus face-to-face check-ups for asthma. *Cochrane Database*  
54 *Syst Rev*. 2016;4:CD011715.  
55  
56 469. Klersy C, Boriani G, De Silvestri A, Mairesse GH, Braunschweig F, Scotti V, et al. Effect of  
57 telemonitoring of cardiac implantable electronic devices on healthcare utilization: a meta-analysis of  
58 randomized controlled trials in patients with heart failure. *Eur J Heart Fail*. 2016;18(2):195-204.  
59  
60 470. Pandor A, Gomersall T, Stevens JW, Wang J, Al-Mohammad A, Bakhai A, et al. Remote  
monitoring after recent hospital discharge in patients with heart failure: a systematic review and  
network meta-analysis. *Heart*. 2013;99(23):1717-26.  
471. Vegesna A, Tran M, Angelaccio M, Arcona S. Remote Patient Monitoring via Non-Invasive  
Digital Technologies: A Systematic Review. *Telemed J E Health*. 2017;23(1):3-17.  
472. Antoniou SA, Antoniou GA, Franzen J, Bollmann S, Koch OO, Pointner R, et al. A  
comprehensive review of telementoring applications in laparoscopic general surgery. *Surg Endosc*.  
2012;26(8):2111-6.



- 1  
2  
3 473. Kew KM, Cates CJ. Home telemonitoring and remote feedback between clinic visits for  
4 asthma. *Cochrane Database of Systematic Reviews*. 2016(8).
- 5 474. Aguas Peris M, Del Hoyo J, Bebia P, Faubel R, Barrios A, Bastida G, et al. Telemedicine in  
6 Inflammatory Bowel Disease: Opportunities and Approaches. *Inflammatory bowel diseases*.  
7 2014;21(2):392-9.
- 8 475. Amadi-Obi A, Gilligan P, Owens N, O'Donnell C. Telemedicine in pre-hospital care: a review  
9 of telemedicine applications in the pre-hospital environment. *Int J Emerg Med*. 2014;7:29.
- 10 476. Car LT, Gentry, S., Hmmt van-Velthoven, M., Car, J. Telephone communication of HIV testing  
11 results for improving knowledge of HIV infection status. *Cochrane Database of Systematic Reviews*.  
12 2013.
- 13 477. Edirippulige S, Martin-Khan M, Beattie E, Smith AC, Gray LC. A systematic review of  
14 telemedicine services for residents in long term care facilities. *Journal of telemedicine and telecare*.  
15 2013;19(3).
- 16 478. Flodgren G, Rachas A, Farmer AJ, Inzitari M, Shepperd S. Interactive telemedicine: effects on  
17 professional practice and health care outcomes. *Cochrane Database Syst Rev*. 2015(9):CD002098.
- 18 479. Hilgart JS, Hayward JA, Coles B, Iredale R. Telegenetics: a systematic review of telemedicine  
19 in genetics services. *Genetics in medicine : official journal of the American College of Medical  
20 Genetics*. 2012;14(9):765-76.
- 21 480. Jhaveri D, Larkins S, Sabesan S. Telestroke, tele-oncology and teledialysis: a systematic  
22 review to analyse the outcomes of active therapies delivered with telemedicine support. *Journal of  
23 telemedicine and telecare*. 2015;21(4):181-8.
- 24 481. Marcolino MS, Maia JX, Alkmim MB, Boersma E, Ribeiro AL. Telemedicine application in the  
25 care of diabetes patients: systematic review and meta-analysis. *PLoS One*. 2013;8(11):e79246.
- 26 482. Rasekaba TM, Furler J, Blackberry I, Tacey M, Gray K, Lim K. Telemedicine interventions for  
27 gestational diabetes mellitus: A systematic review and meta-analysis. *Diabetes research and clinical  
28 practice*. 2015;110(1):1-9.
- 29 483. Tan IJ, Dobson LP, Bartnik S, Muir J, Turner AW. Real-time teleophthalmology versus face-to-  
30 face consultation: A systematic review. *Journal of telemedicine and telecare*. 2016;23(7):629-38.
- 31 484. Tan K, Lai NM. Telemedicine for the support of parents of high-risk newborn infants.  
32 *Cochrane Database Syst Rev*. 2012(6):CD006818.
- 33 485. Thomas SM, Jeyaraman MM, Hodge WG, Hutnik C, Costella J, Malvankar-Mehta MS. The  
34 effectiveness of teleglaucoma versus in-patient examination for glaucoma screening: a systematic  
35 review and meta-analysis. *PLoS One*. 2014;9(12):e113779.
- 36 486. Zandbelt LC, de Kanter FE, Ubbink DT. E-consulting in a medical specialist setting: Medicine  
37 of the future? *Patient education and counseling*. 2015;99(5):689-705.
- 38 487. Donoghue K, Patton R, Phillips T, Deluca P, Drummond C. The effectiveness of electronic  
39 screening and brief intervention for reducing levels of alcohol consumption: a systematic review and  
40 meta-analysis. *Journal of medical Internet research*. 2014;16(6):e142.
- 41 488. Tansil KA, Esser MB, Sandhu P, Reynolds JA, Elder RW, Williamson RS, et al. Alcohol  
42 Electronic Screening and Brief Intervention: A Community Guide Systematic Review. *American  
43 journal of preventive medicine*. 2016;51(5):801-11.
- 44 489. Bittner AK, Wykstra SL, Yoshinaga PD, Li T. Telerehabilitation for people with low vision.  
45 *Cochrane Database Syst Rev*. 2015;8:CD011019.
- 46 490. Cottrell MA, Galea OA, O'Leary SP, Hill AJ, Russell TG. Real-time telerehabilitation for the  
47 treatment of musculoskeletal conditions is effective and comparable to standard practice: a  
48 systematic review and meta-analysis. *Clin Rehabil*. 2017;31(5):625-38.
- 49 491. Khan F, Amatya, B., Kesselring, J. and Galea, M. Telerehabilitation for persons with multiple  
50 sclerosis. *Cochrane Database of Systematic Reviews*. 2015.
- 51 492. Laver KE, Schoene D, Crotty M, George S, Lannin NA, Sherrington C. Telerehabilitation  
52 services for stroke. *Cochrane Database Syst Rev*. 2013(12):CD010255.
- 53  
54  
55  
56  
57  
58  
59  
60

- 1  
2  
3 493. Shukla H, Nair SR, Thakker D. Role of telerehabilitation in patients following total knee  
4 arthroplasty: Evidence from a systematic literature review and meta-analysis. *Journal of*  
5 *telemedicine and telecare*. 2016;23(2):339-46.
- 6 494. Adedoyin AC, Sherr ME, Adedoyin OO, Royse DD, Jackson MS, Adu-Boahene AB. The  
7 Characteristics of Effective Cancer Education Media Interventions among African Americans: A  
8 Systematic Review. *Journal of evidence-informed social work*. 2015;13(4):1-14.
- 9 495. Alfred M, Ubogaya K, Chen X, Wint D, Worrall PS. Effectiveness of culturally focused  
10 interventions in increasing the satisfaction of hospitalized Asian patients: a systematic review. *JBHI*  
11 *Database System Rev Implement Rep*. 2016;14(8):219-56.
- 12 496. Antonio MC, Chung-Do JJ. Systematic review of interventions focusing on Indigenous  
13 adolescent mental health and substance use. *American Indian and Alaska native mental health*  
14 *research (Online)*. 2015;22(3):36-56.
- 15 497. Attridge M, Creamer, J., Ramsden, M., Cannings-John, R., Hawthorne, K. Culturally  
16 appropriate health education for people in ethnic minority groups with type 2 diabetes mellitus.  
17 *Cochrane Database of Systematic Reviews*. 2014.
- 18 498. Coast E, Jones E, Lattof SR, Portela A. Effectiveness of interventions to provide culturally  
19 appropriate maternity care in increasing uptake of skilled maternity care: a systematic review.  
20 *Health Policy Plan*. 2016;31(10):1479-91.
- 21 499. Escribà-Agüir V, Rodríguez-Gómez M, Ruiz-Pérez I. Effectiveness of patient-targeted  
22 interventions to promote cancer screening among ethnic minorities: A systematic review. *Cancer*  
23 *epidemiology*. 2016;44:22-39.
- 24 500. Leske S, Harris MG, Charlson FJ, Ferrari AJ, Baxter AJ, Logan JM, et al. Systematic review of  
25 interventions for Indigenous adults with mental and substance use disorders in Australia, Canada,  
26 New Zealand and the United States. *Aust N Z J Psychiatry*. 2016;50(11):1040-54.
- 27 501. Lood Q, Häggblom-Kronlöf G, Dahlin-Ivanoff S. Health promotion programme design and  
28 efficacy in relation to ageing persons with culturally and linguistically diverse backgrounds: a  
29 systematic literature review and meta-analysis. *BMC health services research*. 2015;15(1):560.
- 30 502. Washio Y, Cassey H. Systematic Review of Interventions for Racial/Ethnic-Minority Pregnant  
31 Smokers. *J Smok Cessat*. 2016;11(1):12-27.
- 32 503. Aslam RhW, Hendry M, Booth A, Carter B, Charles JM, Craine N, et al. Intervention Now to  
33 Eliminate Repeat Unintended Pregnancy in Teenagers (INTERUPT): a systematic review of  
34 intervention effectiveness and cost-effectiveness, and qualitative and realist synthesis of  
35 implementation factors and user engagement. *BMC Medicine*. 2017;15(1):155.
- 36 504. Health Quality O. Interventions to Improve Access to Primary Care for People Who Are  
37 Homeless: A Systematic Review. *Ontario health technology assessment series*. 2016;16(9):1-50.
- 38 505. Anderson LM, Adeney, K. L., Shinn, C., Safranek, S., Buckner-Brown, J. and Krause, L. K.  
39 Community coalition-driven interventions to reduce health disparities among racial and ethnic  
40 minority populations. *Cochrane Database of Systematic Reviews*. 2015.
- 41 506. Gottlieb LM, Garcia K, Wing H, Manchanda R. Clinical interventions addressing nonmedical  
42 health determinants in Medicaid managed care. *Am J Manag Care*. 2016;22(5):370-6.
- 43 507. Nierkens V, Hartman MA, Nicolaou M, Vissenberg C, Beune EJ, Hosper K, et al. Effectiveness  
44 of cultural adaptations of interventions aimed at smoking cessation, diet, and/or physical activity in  
45 ethnic minorities. a systematic review. *PLoS One*. 2013;8(10):e73373.
- 46 508. Antoine SL, Pieper D, Mathes T, Eikermann M. Improving the adherence of type 2 diabetes  
47 mellitus patients with pharmacy care: a systematic review of randomized controlled trials. *BMC*  
48 *Endocr Disord*. 2014;14:53.
- 49 509. Chaiyachati KH, Ogbuaji O, Price M, Suthar AB, Negussie EK, Bärnighausen T. Interventions  
50 to improve adherence to antiretroviral therapy: a rapid systematic review. *AIDS (London, England)*.  
51 2014;28 Suppl 2(SUPPL. 2):S187-204.
- 52 510. Farmer AJ, McSharry, J., Rowbotham, S., McGowan, L., Ricci-Cabello, I. and French, D. P.  
53 Effects of interventions promoting monitoring of medication use and brief messaging on medication  
54  
55  
56  
57  
58  
59  
60



- 1  
2  
3 adherence for people with Type 2 diabetes: a systematic review of randomized trials. *Diabetic*  
4 *medicine : a journal of the British Diabetic Association*. 2015.
- 5 511. Hu D, Juarez DT, Yeboah M, Castillo TP. Interventions to increase medication adherence in  
6 African-American and Latino populations: a literature review. *Hawai'i journal of medicine & public*  
7 *health : a journal of Asia Pacific Medicine & Public Health*. 2014;73(1):11-8.
- 8 512. Nieuwlaat R, Wilczynski N, Navarro T, Hobson N, Jeffery R, Keenanasseril A, et al.  
9 Interventions for enhancing medication adherence. *Cochrane Database Syst Rev*.  
10 2014(11):CD000011.
- 11 513. Njie GJ, Finnie RK, Acharya SD, Jacob V, Proia KK, Hopkins DP, et al. Reducing Medication  
12 Costs to Prevent Cardiovascular Disease: A Community Guide Systematic Review. *Prev Chronic Dis*.  
13 2015;12:E208.
- 14 514. Ruppap TM, Cooper PS, Mehr DR, Delgado JM, Dunbar-Jacob JM. Medication Adherence  
15 Interventions Improve Heart Failure Mortality and Readmission Rates: Systematic Review and Meta-  
16 Analysis of Controlled Trials. *Journal of the American Heart Association*. 2016;5(6).
- 17 515. Sapkota S, Brien JA, Greenfield J, Aslani P. A systematic review of interventions addressing  
18 adherence to anti-diabetic medications in patients with type 2 diabetes--impact on adherence. *PLoS*  
19 *One*. 2015;10(2):e0118296.
- 20 516. van Driel ML, Morledge MD, Ulep R, Shaffer JP, Davies P, Deichmann R. Interventions to  
21 improve adherence to lipid-lowering medication. *Cochrane Database Syst Rev*. 2016;12:Cd004371.
- 22 517. Viswanathan M, Golin CE, Jones CD, Ashok M, Blalock S, Wines RC, et al. Closing the quality  
23 gap: revisiting the state of the science (vol. 4: medication adherence interventions: comparative  
24 effectiveness). Evidence report/technology assessment. 2012(208.4):1-685.
- 25 518. Viswanathan M, Golin CE, Jones CD, Ashok M, Blalock SJ, Wines RC, et al. Interventions to  
26 improve adherence to self-administered medications for chronic diseases in the United States: a  
27 systematic review. *Ann Intern Med*. 2012;157(11):785-95.
- 28 519. Smith SM, Wallace E, O'Dowd T, Fortin M. Interventions for improving outcomes in patients  
29 with multimorbidity in primary care and community settings. *Cochrane Database Syst Rev*.  
30 2016;3:CD006560.
- 31 520. Leppin AL, Gionfriddo MR, Kessler M, Brito JP, Mair FS, Gallacher K, et al. Preventing 30-day  
32 hospital readmissions: a systematic review and meta-analysis of randomized trials. *JAMA Intern*  
33 *Med*. 2014;174(7):1095-107.
- 34 521. Chaudhuri D, Montgomery A, Gulenchyn K, Mitchell M, Joseph P. Effectiveness of Quality  
35 Improvement Interventions at Reducing Inappropriate Cardiac Imaging: A Systematic Review and  
36 Meta-Analysis. *Circulation Cardiovascular quality and outcomes*. 2016.
- 37 522. Jenkins HJ, Hancock, M. J., French, S. D., Maher, C. G., Engel, R. M. and Magnussen, J. S.  
38 Effectiveness of interventions designed to reduce the use of imaging for low-back pain: a systematic  
39 review. *CMAJ : Canadian Medical Association journal = journal de l'Association medicale canadienne*.  
40 2015.
- 41 523. Thomas RE, Vaska M, Naugler C, Turin TC. Interventions at the laboratory level to reduce  
42 laboratory test ordering by family physicians: Systematic review. *Clinical biochemistry*.  
43 2015;48(18):1358-65.
- 44 524. Kynoch K, Chang A, Coyer F, McArdle A. The effectiveness of interventions to meet family  
45 needs of critically ill patients in an adult intensive care unit: a systematic review update. *JB*  
46 *Database System Rev Implement Rep*. 2016;14(3):181-234.
- 47 525. Lopez LM, Steiner M, Grimes DA, Hilgenberg D, Schulz KF. Strategies for communicating  
48 contraceptive effectiveness. *Cochrane Database Syst Rev*. 2013(4):CD006964.
- 49 526. Marcelino CA, Díaz LJ, Da Cruz DM. The effectiveness of interventions in managing treatment  
50 adherence in adult heart transplant patients: a systematic review. *JB* *database of systematic reviews*  
51 *and implementation reports*. 2015;13(9):279-308.
- 52 527. Wu YP, Pai AL. Health care provider-delivered adherence promotion interventions: a meta-  
53 analysis. *Pediatrics*. 2014;133(6):e1698-707.
- 54  
55  
56  
57  
58  
59  
60

- 1  
2  
3 528. Greene JA, Bina R, Gum AM. Interventions to Increase Retention in Mental Health Services:  
4 A Systematic Review. *Psychiatric services (Washington, DC)*. 2016;67(5):485-95.  
5 529. Crocker-Buque T, Edelstein M, Mounier-Jack S. Interventions to reduce inequalities in  
6 vaccine uptake in children and adolescents aged <19 years: a systematic review. *J Epidemiol  
7 Community Health*. 2017;71(1):87-97.  
8 530. Sadaf A, Richards JL, Glanz J, Salmon DA, Omer SB. A systematic review of interventions for  
9 reducing parental vaccine refusal and vaccine hesitancy. *Vaccine*. 2013;31(40):4293-304.  
10 531. Thomas RE, Lorenzetti DL. Interventions to increase influenza vaccination rates of those 60  
11 years and older in the community. *Cochrane Database Syst Rev*. 2014(7):CD005188.  
12  
13  
14  
15  
16  
17  
18  
19  
20  
21  
22  
23  
24  
25  
26  
27  
28  
29  
30  
31  
32  
33  
34  
35  
36  
37  
38  
39  
40  
41  
42  
43  
44  
45  
46  
47  
48  
49  
50  
51  
52  
53  
54  
55  
56  
57  
58  
59  
60

For peer review only

## Supplementary file 3

**Table: Summary of health conditions represented in included reviews organised by EPOC Taxonomy of delivery arrangement interventions**

| EPOC Taxonomy category and health condition                                    | No. of Reviews |
|--------------------------------------------------------------------------------|----------------|
| <b>How and when care is delivered (n=47)</b>                                   |                |
| Acute respiratory infections                                                   | 2              |
| Aging (general)                                                                | 3              |
| Asthma                                                                         | 1              |
| Chronic conditions (multiple included in review or multi-morbidity)            | 4              |
| Chronic non-cancer pain                                                        | 1              |
| Critically ill                                                                 | 2              |
| Diabetes                                                                       | 1              |
| Human immunodeficiency virus (HIV)                                             | 1              |
| Maternal and child health                                                      | 7              |
| Mental health                                                                  | 1              |
| Musculoskeletal conditions                                                     | 1              |
| Oral health                                                                    | 1              |
| Surgery (including preoperative care & safety checklists)                      | 4              |
| Terminally ill                                                                 | 1              |
| No specific health condition targeted                                          | 17             |
| <b>Where care is provided and changes to the healthcare environment (n=55)</b> |                |
| Aging (general)                                                                | 2              |
| Asthma                                                                         | 1              |
| Cancer                                                                         | 2              |
| Chronic conditions (multiple included in review or multi-morbidity)            | 1              |
| Chronic kidney disease                                                         | 2              |
| Chronic obstructive pulmonary disease (COPD)                                   | 3              |
| Critically ill                                                                 | 1              |
| Cardiovascular disease (CVD)                                                   | 5              |
| Cystic fibrosis                                                                | 1              |

1  
2  
3  
4  
5  
6  
7  
8  
9  
10  
11  
12  
13  
14  
15  
16  
17  
18  
19  
20  
21  
22  
23  
24  
25  
26  
27  
28  
29  
30  
31  
32  
33  
34  
35  
36  
37  
38  
39  
40  
41  
42  
43  
44  
45  
46  
47  
48  
49  
50  
51  
52  
53  
54  
55  
56  
57  
58  
59  
60

|                                                                                                                              |    |
|------------------------------------------------------------------------------------------------------------------------------|----|
| Human immunodeficiency virus (HIV)                                                                                           | 1  |
| Lifestyle & Prevention (immunisations, and prevention programs targeting physical activity, drug and alcohol, diet, smoking) | 4  |
| Major trauma                                                                                                                 | 1  |
| Maternal and child health                                                                                                    | 10 |
| Mental health                                                                                                                | 5  |
| Musculoskeletal conditions                                                                                                   | 2  |
| Sexual and reproductive health                                                                                               | 1  |
| Surgery (including preoperative care & safety checklists)                                                                    | 1  |
| Terminally ill                                                                                                               | 2  |
| No specific health condition targeted                                                                                        | 10 |
| <b>Who provides care and how the healthcare workforce is managed (n=80)</b>                                                  |    |
| Acute respiratory infections                                                                                                 | 1  |
| Ageing                                                                                                                       | 4  |
| Asthma                                                                                                                       | 2  |
| Bowel conditions                                                                                                             | 1  |
| Cancer                                                                                                                       | 4  |
| Chronic conditions (multiple included in review or multi-morbidity)                                                          | 8  |
| Chronic kidney disease                                                                                                       | 1  |
| Chronic obstructive pulmonary disease (COPD)                                                                                 | 1  |
| Cardiovascular disease (CVD)                                                                                                 | 6  |
| Dementia                                                                                                                     | 1  |
| Diabetes                                                                                                                     | 2  |
| Human immunodeficiency virus (HIV)                                                                                           | 2  |
| Lifestyle & Prevention (immunisations, and prevention programs targeting physical activity, drug and alcohol, diet, smoking) | 4  |
| Major trauma                                                                                                                 | 2  |
| Maternal and child health                                                                                                    | 5  |
| Mental health                                                                                                                | 6  |
| Multiple sclerosis                                                                                                           | 1  |
| Musculoskeletal conditions                                                                                                   | 1  |
| Oral health                                                                                                                  | 3  |

|                                                                                                                              |    |
|------------------------------------------------------------------------------------------------------------------------------|----|
| Sexual and reproductive health                                                                                               | 2  |
| Surgery (including preoperative care & safety checklists)                                                                    | 5  |
| Terminally ill                                                                                                               | 1  |
| No specific health condition targeted                                                                                        | 17 |
| <b>Coordination of care and management of care processes (n=122)</b>                                                         |    |
| Acute respiratory infections                                                                                                 | 1  |
| Ageing                                                                                                                       | 7  |
| Asthma                                                                                                                       | 2  |
| Cancer                                                                                                                       | 9  |
| Chronic conditions (multiple included in review or multi-morbidity)                                                          | 7  |
| Chronic kidney disease                                                                                                       | 2  |
| Chronic viral hepatitis                                                                                                      | 1  |
| Chronic obstructive pulmonary disease (COPD)                                                                                 | 2  |
| Critically ill                                                                                                               | 2  |
| Cardiovascular disease (CVD)                                                                                                 | 6  |
| Dementia                                                                                                                     | 7  |
| Diabetes                                                                                                                     | 8  |
| Epilepsy                                                                                                                     | 2  |
| Haemophilia                                                                                                                  | 1  |
| Human immunodeficiency virus (HIV)                                                                                           | 4  |
| Intellectual disability                                                                                                      | 1  |
| Lifestyle & Prevention (immunisations, and prevention programs targeting physical activity, drug and alcohol, diet, smoking) | 1  |
| Major trauma                                                                                                                 | 1  |
| Maternal and child health                                                                                                    | 8  |
| Mental health                                                                                                                | 9  |
| Musculoskeletal conditions                                                                                                   | 4  |
| Surgery (including preoperative care & safety checklists)                                                                    | 4  |
| Terminally ill                                                                                                               | 6  |
| No specific health condition targeted                                                                                        | 27 |
| <b>Information and communication technology systems (n=189)</b>                                                              |    |
| Ageing                                                                                                                       | 1  |

1  
2  
3  
4  
5  
6  
7  
8  
9  
10  
11  
12  
13  
14  
15  
16  
17  
18  
19  
20  
21  
22  
23  
24  
25  
26  
27  
28  
29  
30  
31  
32  
33  
34  
35  
36  
37  
38  
39  
40  
41  
42  
43  
44  
45  
46  
47  
48  
49  
50  
51  
52  
53  
54  
55  
56  
57  
58  
59  
60

|                                                                                                                              |    |
|------------------------------------------------------------------------------------------------------------------------------|----|
| Amyotrophic lateral sclerosis                                                                                                | 1  |
| Asthma                                                                                                                       | 3  |
| Bowel conditions                                                                                                             | 2  |
| Cancer                                                                                                                       | 4  |
| Chronic conditions (multiple included in review or multi-morbidity)                                                          | 16 |
| Chronic kidney disease                                                                                                       | 1  |
| Chronic obstructive pulmonary disease (COPD)                                                                                 | 2  |
| Cardiovascular disease (CVD)                                                                                                 | 9  |
| Dementia                                                                                                                     | 2  |
| Diabetes                                                                                                                     | 15 |
| Eye care                                                                                                                     | 3  |
| Human immunodeficiency virus (HIV)                                                                                           | 6  |
| Inflammatory bowel disease                                                                                                   | 1  |
| Lifestyle & Prevention (immunisations, and prevention programs targeting physical activity, drug and alcohol, diet, smoking) | 39 |
| Maternal and child health                                                                                                    | 5  |
| Mental health                                                                                                                | 44 |
| Multiple sclerosis                                                                                                           | 1  |
| Musculoskeletal conditions                                                                                                   | 3  |
| Sexual and reproductive health                                                                                               | 2  |
| Surgery (including preoperative care & safety checklists)                                                                    | 4  |
| Tuberculosis                                                                                                                 | 1  |
| No specific health condition targeted                                                                                        | 24 |
| <b>Goal-focused reviews (n=38)</b>                                                                                           |    |
| Cancer                                                                                                                       | 2  |
| Chronic conditions (multiple included in review or multi-morbidity)                                                          | 4  |
| Critically ill                                                                                                               | 1  |
| Cardiovascular disease (CVD)                                                                                                 | 5  |
| Diabetes                                                                                                                     | 4  |
| Human immunodeficiency virus (HIV)                                                                                           | 1  |
| Lifestyle & Prevention (immunisations, and prevention programs targeting physical activity, drug and alcohol, diet, smoking) | 5  |



|    |                                       |            |
|----|---------------------------------------|------------|
| 1  |                                       |            |
| 2  |                                       |            |
| 3  | Maternal and child health             | 3          |
| 4  |                                       |            |
| 5  | Mental health                         | 2          |
| 6  |                                       |            |
| 7  | Musculoskeletal conditions            | 1          |
| 8  |                                       |            |
| 9  | Sexual and reproductive health        | 1          |
| 10 |                                       |            |
| 11 | No specific health condition targeted | 9          |
| 12 |                                       |            |
| 13 | <b>Total</b>                          | <b>531</b> |
| 14 |                                       |            |
| 15 |                                       |            |
| 16 |                                       |            |
| 17 |                                       |            |
| 18 |                                       |            |
| 19 |                                       |            |
| 20 |                                       |            |
| 21 |                                       |            |
| 22 |                                       |            |
| 23 |                                       |            |
| 24 |                                       |            |
| 25 |                                       |            |
| 26 |                                       |            |
| 27 |                                       |            |
| 28 |                                       |            |
| 29 |                                       |            |
| 30 |                                       |            |
| 31 |                                       |            |
| 32 |                                       |            |
| 33 |                                       |            |
| 34 |                                       |            |
| 35 |                                       |            |
| 36 |                                       |            |
| 37 |                                       |            |
| 38 |                                       |            |
| 39 |                                       |            |
| 40 |                                       |            |
| 41 |                                       |            |
| 42 |                                       |            |
| 43 |                                       |            |
| 44 |                                       |            |
| 45 |                                       |            |
| 46 |                                       |            |
| 47 |                                       |            |
| 48 |                                       |            |
| 49 |                                       |            |
| 50 |                                       |            |
| 51 |                                       |            |
| 52 |                                       |            |
| 53 |                                       |            |
| 54 |                                       |            |
| 55 |                                       |            |
| 56 |                                       |            |
| 57 |                                       |            |
| 58 |                                       |            |
| 59 |                                       |            |
| 60 |                                       |            |

For peer review only

## Preferred Reporting Items for Systematic reviews and Meta-Analyses extension for Scoping Reviews (PRISMA-ScR) Checklist

| SECTION                                               | ITEM | PRISMA-ScR CHECKLIST ITEM                                                                                                                                                                                                                                                                                  | REPORTED ON PAGE # |
|-------------------------------------------------------|------|------------------------------------------------------------------------------------------------------------------------------------------------------------------------------------------------------------------------------------------------------------------------------------------------------------|--------------------|
| <b>TITLE</b>                                          |      |                                                                                                                                                                                                                                                                                                            |                    |
| Title                                                 | 1    | Identify the report as a scoping review.                                                                                                                                                                                                                                                                   | pp.1,2,6           |
| <b>ABSTRACT</b>                                       |      |                                                                                                                                                                                                                                                                                                            |                    |
| Structured summary                                    | 2    | Provide a structured summary that includes (as applicable): background, objectives, eligibility criteria, sources of evidence, charting methods, results, and conclusions that relate to the review questions and objectives.                                                                              | p. 2               |
| <b>INTRODUCTION</b>                                   |      |                                                                                                                                                                                                                                                                                                            |                    |
| Rationale                                             | 3    | Describe the rationale for the review in the context of what is already known. Explain why the review questions/objectives lend themselves to a scoping review approach.                                                                                                                                   | pp.4-6             |
| Objectives                                            | 4    | Provide an explicit statement of the questions and objectives being addressed with reference to their key elements (e.g., population or participants, concepts, and context) or other relevant key elements used to conceptualize the review questions and/or objectives.                                  | p.6                |
| <b>METHODS</b>                                        |      |                                                                                                                                                                                                                                                                                                            |                    |
| Protocol and registration                             | 5    | Indicate whether a review protocol exists; state if and where it can be accessed (e.g., a Web address); and if available, provide registration information, including the registration number.                                                                                                             | p.7                |
| Eligibility criteria                                  | 6    | Specify characteristics of the sources of evidence used as eligibility criteria (e.g., years considered, language, and publication status), and provide a rationale.                                                                                                                                       | pp.7-8             |
| Information sources*                                  | 7    | Describe all information sources in the search (e.g., databases with dates of coverage and contact with authors to identify additional sources), as well as the date the most recent search was executed.                                                                                                  | pp.8               |
| Search                                                | 8    | Present the full electronic search strategy for at least 1 database, including any limits used, such that it could be repeated.                                                                                                                                                                            | pp.8-9             |
| Selection of sources of evidence†                     | 9    | State the process for selecting sources of evidence (i.e., screening and eligibility) included in the scoping review.                                                                                                                                                                                      | pp.8-9             |
| Data charting process‡                                | 10   | Describe the methods of charting data from the included sources of evidence (e.g., calibrated forms or forms that have been tested by the team before their use, and whether data charting was done independently or in duplicate) and any processes for obtaining and confirming data from investigators. | p.9                |
| Data items                                            | 11   | List and define all variables for which data were sought and any assumptions and simplifications made.                                                                                                                                                                                                     | pp.9-10            |
| Critical appraisal of individual sources of evidence§ | 12   | If done, provide a rationale for conducting a critical appraisal of included sources of evidence; describe the methods used and how this information was used in any data synthesis (if appropriate).                                                                                                      | n/a                |
| Synthesis of results                                  | 13   | Describe the methods of handling and summarizing the data that were charted.                                                                                                                                                                                                                               | p.10               |



| SECTION                                       | ITEM | PRISMA-ScR CHECKLIST ITEM                                                                                                                                                                       | REPORTED ON PAGE # |
|-----------------------------------------------|------|-------------------------------------------------------------------------------------------------------------------------------------------------------------------------------------------------|--------------------|
| <b>RESULTS</b>                                |      |                                                                                                                                                                                                 |                    |
| Selection of sources of evidence              | 14   | Give numbers of sources of evidence screened, assessed for eligibility, and included in the review, with reasons for exclusions at each stage, ideally using a flow diagram.                    | p.10-11            |
| Characteristics of sources of evidence        | 15   | For each source of evidence, present characteristics for which data were charted and provide the citations.                                                                                     | pp.11-17           |
| Critical appraisal within sources of evidence | 16   | If done, present data on critical appraisal of included sources of evidence (see item 12).                                                                                                      | n/a                |
| Results of individual sources of evidence     | 17   | For each included source of evidence, present the relevant data that were charted that relate to the review questions and objectives.                                                           | pp.11-17           |
| Synthesis of results                          | 18   | Summarize and/or present the charting results as they relate to the review questions and objectives.                                                                                            | pp.11-17           |
| <b>DISCUSSION</b>                             |      |                                                                                                                                                                                                 |                    |
| Summary of evidence                           | 19   | Summarize the main results (including an overview of concepts, themes, and types of evidence available), link to the review questions and objectives, and consider the relevance to key groups. | pp.18-20           |
| Limitations                                   | 20   | Discuss the limitations of the scoping review process.                                                                                                                                          | pp.20-21           |
| Conclusions                                   | 21   | Provide a general interpretation of the results with respect to the review questions and objectives, as well as potential implications and/or next steps.                                       | p.19, 20-21        |
| <b>FUNDING</b>                                |      |                                                                                                                                                                                                 |                    |
| Funding                                       | 22   | Describe sources of funding for the included sources of evidence, as well as sources of funding for the scoping review. Describe the role of the funders of the scoping review.                 | p. 6, 22           |

JBI = Joanna Briggs Institute; PRISMA-ScR = Preferred Reporting Items for Systematic reviews and Meta-Analyses extension for Scoping Reviews.

\* Where *sources of evidence* (see second footnote) are compiled from, such as bibliographic databases, social media platforms, and Web sites.

† A more inclusive/heterogeneous term used to account for the different types of evidence or data sources (e.g., quantitative and/or qualitative research, expert opinion, and policy documents) that may be eligible in a scoping review as opposed to only studies. This is not to be confused with *information sources* (see first footnote).

‡ The frameworks by Arksey and O'Malley (6) and Levac and colleagues (7) and the JBI guidance (4, 5) refer to the process of data extraction in a scoping review as data charting.

§ The process of systematically examining research evidence to assess its validity, results, and relevance before using it to inform a decision. This term is used for items 12 and 19 instead of "risk of bias" (which is more applicable to systematic reviews of interventions) to include and acknowledge the various sources of evidence that may be used in a scoping review (e.g., quantitative and/or qualitative research, expert opinion, and policy document).

From: Tricco AC, Lillie E, Zarin W, O'Brien KK, Colquhoun H, Levac D, et al. PRISMA Extension for Scoping Reviews (PRISMA-ScR): Checklist and Explanation. *Ann Intern Med.* ;169:467–473. doi: 10.7326/M18-0850

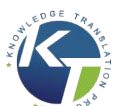

St. Michael's

Inspired Care.  
Inspiring Science.

For peer review only - <http://bmjopen.bmj.com/site/about/guidelines.xhtml>
