# Supplementary material for: Identifying alternative models of healthcare service delivery to inform health system improvement: scoping review of systematic reviews
Source: PubMed Central journal article supplement — BMJ Open. 2020 Mar 29;10(3):e036112. doi: 10.1136/bmjopen-2019-036112 (PMC7170607; doi:10.1136/bmjopen-2019-036112), 2020-03-29
Supplement: bmjopen-2019-036112supp002.pdf [file bmjopen-2019-036112supp002.pdf]

## Supplementary file 2

| Delivery arrangement by EPOC Taxonomy category and subcategory                 | EPOC Definition                                                                                                                                                            | No of SRs | Intervention details                                                                                                                                                                                                                                                                                                                                                                                                                                                                                                                                                                                                                                                                                                                                                                                                                                                                                                                                                                                                                                                                                                                                                                                                                                                                                                                                                                                                                                                                              |
|--------------------------------------------------------------------------------|----------------------------------------------------------------------------------------------------------------------------------------------------------------------------|-----------|---------------------------------------------------------------------------------------------------------------------------------------------------------------------------------------------------------------------------------------------------------------------------------------------------------------------------------------------------------------------------------------------------------------------------------------------------------------------------------------------------------------------------------------------------------------------------------------------------------------------------------------------------------------------------------------------------------------------------------------------------------------------------------------------------------------------------------------------------------------------------------------------------------------------------------------------------------------------------------------------------------------------------------------------------------------------------------------------------------------------------------------------------------------------------------------------------------------------------------------------------------------------------------------------------------------------------------------------------------------------------------------------------------------------------------------------------------------------------------------------------|
| <b>How and when care is delivered (n= 47)</b>                                  |                                                                                                                                                                            |           |                                                                                                                                                                                                                                                                                                                                                                                                                                                                                                                                                                                                                                                                                                                                                                                                                                                                                                                                                                                                                                                                                                                                                                                                                                                                                                                                                                                                                                                                                                   |
| Queuing strategies                                                             | A reduction or increase in time to access a healthcare intervention, for example managed waiting lists, managing ER wait time.                                             | 7         | <ul style="list-style-type: none"> <li>- ED visit reduction programs (1, 2)</li> <li>- Improving patient flow and quality of care in the ED (3, 4)</li> <li>- Interventions to reduce waiting times for elective surgical procedures (5)</li> <li>- Patient initiated clinics for patients with chronic or recurrent conditions managed in secondary care (6, 7)</li> </ul>                                                                                                                                                                                                                                                                                                                                                                                                                                                                                                                                                                                                                                                                                                                                                                                                                                                                                                                                                                                                                                                                                                                       |
| Group versus individual care                                                   | Providing care to groups versus individual patients                                                                                                                        | 5         | <ul style="list-style-type: none"> <li>- Group clinics (chronic conditions, antenatal care) (8-12)</li> </ul>                                                                                                                                                                                                                                                                                                                                                                                                                                                                                                                                                                                                                                                                                                                                                                                                                                                                                                                                                                                                                                                                                                                                                                                                                                                                                                                                                                                     |
| Quality and Safety                                                             | Essential standards for quality of healthcare, and reduction of poor outcomes related to unsafe healthcare                                                                 | 33        | <ul style="list-style-type: none"> <li>- Immediate versus deferred delivery of the preterm baby with suspected foetal compromise for improving outcomes (13)</li> <li>- Implementation of guidelines and evidence-based (14, 15)</li> <li>- Integrated care models (chronic diseases, specifically CVD, diabetes type 2, cancer, childhood obesity, haemophilia, mental health, multi-morbidities, chronic viral hepatitis) (16)</li> <li>- Interventions to increase breastfeeding (17)</li> <li>- Medication reconciliation interventions at hospital (18)</li> <li>- Patient safety interventions (in dentistry, acute care, ED; using safety check list, interventions to reduce wrong-site surgery, involvement in National Surgical Quality Improvement Program, incidence and error reporting at ICU, use of patient portals and EMR to improve safety of surgical procedures and medication prescription) (19-24)</li> <li>- Promoting hand hygiene (25)</li> <li>- Promoting use of guidelines and evidence-based medicine (26-29)</li> <li>- Reducing disparities in health and health care (30)</li> <li>- Reducing exposure to ionizing radiation from medical imaging (31)</li> <li>- Reducing medication and over-prescription (antibiotic use, opioid prescription, administration errors in children and adults, inappropriate prescribing in elderly) (32-44)</li> <li>- Using interpreters for non-English speakers on the delivery of palliative care (cancer) (45)</li> </ul> |
| Triage                                                                         | Management of patients attending a healthcare facility, or contacting a healthcare professional by phone, and receiving advice or being referral to an appropriate service | 2         | <ul style="list-style-type: none"> <li>- Improving patient flow and quality of care in the ED (46)</li> <li>- Pharmacist involvement in care for patients with chronic disease (heart failure and acute coronary syndrome, chronic kidney disease, HIV, cancer, mental disease), lifestyle changes (immunization, obesity, alcohol, smoking) (47)</li> </ul>                                                                                                                                                                                                                                                                                                                                                                                                                                                                                                                                                                                                                                                                                                                                                                                                                                                                                                                                                                                                                                                                                                                                      |
| <b>Where care is provided and changes to the healthcare environment (n=55)</b> |                                                                                                                                                                            |           |                                                                                                                                                                                                                                                                                                                                                                                                                                                                                                                                                                                                                                                                                                                                                                                                                                                                                                                                                                                                                                                                                                                                                                                                                                                                                                                                                                                                                                                                                                   |
| Environment                                                                    | Changes to the physical or sensory healthcare environment                                                                                                                  | 1         | Interventions to increase breastfeeding uptake (48)                                                                                                                                                                                                                                                                                                                                                                                                                                                                                                                                                                                                                                                                                                                                                                                                                                                                                                                                                                                                                                                                                                                                                                                                                                                                                                                                                                                                                                               |
| Outreach services                                                              | Visits by health workers to different locations, for example involving specialists, generalists, mobile units                                                              | 1         | Mobile clinical for women's and children's health (49)                                                                                                                                                                                                                                                                                                                                                                                                                                                                                                                                                                                                                                                                                                                                                                                                                                                                                                                                                                                                                                                                                                                                                                                                                                                                                                                                                                                                                                            |
| Site of service                                                                | Changes in where care is provided, for example home vs.                                                                                                                    | 51        | <ul style="list-style-type: none"> <li>- Alternatives to hospitalisations: outpatient management, quick diagnostic units, hospital-at-home, observation units (for induction of</li> </ul>                                                                                                                                                                                                                                                                                                                                                                                                                                                                                                                                                                                                                                                                                                                                                                                                                                                                                                                                                                                                                                                                                                                                                                                                                                                                                                        |

|                                                                              |                                                                                                                                             |    |                                                                                                                                                                                                                                                                                                                                                                                                                                                                                                                                                                                                                                                                                                                                                                                                                                                                                                                                                                                                                                                                                                                                                                                                                                                                                                                                                                                                                                                                                        |
|------------------------------------------------------------------------------|---------------------------------------------------------------------------------------------------------------------------------------------|----|----------------------------------------------------------------------------------------------------------------------------------------------------------------------------------------------------------------------------------------------------------------------------------------------------------------------------------------------------------------------------------------------------------------------------------------------------------------------------------------------------------------------------------------------------------------------------------------------------------------------------------------------------------------------------------------------------------------------------------------------------------------------------------------------------------------------------------------------------------------------------------------------------------------------------------------------------------------------------------------------------------------------------------------------------------------------------------------------------------------------------------------------------------------------------------------------------------------------------------------------------------------------------------------------------------------------------------------------------------------------------------------------------------------------------------------------------------------------------------------|
| delivery                                                                     | healthcare facility, inpatient vs outpatient, specialized vs. non-specialized facility, walk in clinics, medical day hospital, mobile units |    | <p>labour, intravenous antibiotic therapy for cystic fibrosis, cardiac arrest, kidney dialysis, COPD, psychosis, paediatric care) (50-78)</p> <ul style="list-style-type: none"> <li>- ED based interventions (for managing alcohol misuse, domestic violence, palliative care) (79-81)</li> <li>- Home visiting (for pregnancy, child health and maltreatment, social determinants of health, partner violence) (82-87)</li> <li>- Home based prevention and rehabilitation (88-92)</li> <li>- Integrated care models (for chronic diseases, specifically CVD, diabetes type 2, cancer, childhood obesity, haemophilia, mental health, multi-morbidities, chronic viral hepatitis) (93)</li> <li>- Pre-hospital intervention in sepsis (94)</li> <li>- Reaching youth with out-of-facility services (HIV and reproductive health) (95)</li> <li>- School-based health centres for mental health, social determinants of health (96, 97)</li> <li>- Therapeutic communities for mental health (98, 99)</li> <li>- Waiting room based intervention to prevent STD (100)</li> </ul>                                                                                                                                                                                                                                                                                                                                                                                                      |
| Size of organizations                                                        | Increasing or decreasing the size of health service provider units                                                                          | 1  | - Centralisation, specialisation and increasing volume of services to promote quality (e.g. cancer care and surgery) (101)                                                                                                                                                                                                                                                                                                                                                                                                                                                                                                                                                                                                                                                                                                                                                                                                                                                                                                                                                                                                                                                                                                                                                                                                                                                                                                                                                             |
| Transportation services                                                      | Arrangements for transporting patients from one site to another                                                                             | 1  | - Helicopter emergency medical services for adults with major trauma (102)                                                                                                                                                                                                                                                                                                                                                                                                                                                                                                                                                                                                                                                                                                                                                                                                                                                                                                                                                                                                                                                                                                                                                                                                                                                                                                                                                                                                             |
| <b>Who provides care and how the healthcare workforce is managed (n= 80)</b> |                                                                                                                                             |    |                                                                                                                                                                                                                                                                                                                                                                                                                                                                                                                                                                                                                                                                                                                                                                                                                                                                                                                                                                                                                                                                                                                                                                                                                                                                                                                                                                                                                                                                                        |
| Role expansion or task shifting                                              | Expanding tasks undertaken by a cadre of health workers or shifting tasks from one cadre to another                                         | 65 | <ul style="list-style-type: none"> <li>- Advanced practice nursing in older people and in long-term care (103, 104)</li> <li>- Advanced trauma life support training for hospital health professional and ambulance crews (105, 106)</li> <li>- Carer involvement in cognition-based interventions for people with dementia (107)</li> <li>- Community-based health worker interventions (e.g. to improve chronic disease management, care among vulnerable population, preventing adolescent pregnancies, management of urgent, low-acuity illnesses and injuries) (108-110)</li> <li>- Interventions to increase breastfeeding (111)</li> <li>- Nurse-physician substitution (preoperative assessment and anaesthesia for elective surgical patients, care and early Dis plan in chronic diseases, prescribing, endoscopy, patient navigation, managing anxiety, patient education, abortion and maternity care, dental care) (112-136)</li> <li>- Peer-led interventions (e.g. mental health, adolescent lifestyles, paediatric chronic diseases) (137-141)</li> <li>- Pharmacist involvement in care for patients with chronic disease (heart failure and acute coronary syndrome, chronic kidney disease, HIV, cancer, mental disease), lifestyle changes (immunization, obesity, alcohol, smoking) (142-164)</li> <li>- Primary care-led provision of care (e.g. non-urgent care in ED, end-of-life care) (165, 166)</li> <li>- Radiographers in advanced roles (167)</li> </ul> |
| Self-management                                                              | Shifting the provision of care to patients or their families                                                                                | 15 | <ul style="list-style-type: none"> <li>- Patient navigation (breast cancer) (168)</li> <li>- Promoting self-management (e.g. chronic diseases, specifically HIV, diabetes foot care, COPD, asthma, children with epilepsy, anxiety, MS, IBS; self-administration of medication in the hospital, oral anticoagulation, home uterine monitoring for detecting preterm labour) (169-181)</li> <li>- Reducing medication and over-prescription (antibiotic use, opioid prescription, administration errors in children and adults, inappropriate prescribing in elderly) (182)</li> </ul>                                                                                                                                                                                                                                                                                                                                                                                                                                                                                                                                                                                                                                                                                                                                                                                                                                                                                                  |
| <b>Co-ordination of care and management of care processes (n=122)</b>        |                                                                                                                                             |    |                                                                                                                                                                                                                                                                                                                                                                                                                                                                                                                                                                                                                                                                                                                                                                                                                                                                                                                                                                                                                                                                                                                                                                                                                                                                                                                                                                                                                                                                                        |
| Integrated healthcare systems                                                | Bringing together delivery, management and organisation of services related to diagnosis,                                                   | 16 | - Integrated care models (e.g. chronic diseases, specifically CVD, diabetes type 2, cancer, childhood obesity, haemophilia, mental health, multi-morbidities, chronic viral hepatitis) (183-198)                                                                                                                                                                                                                                                                                                                                                                                                                                                                                                                                                                                                                                                                                                                                                                                                                                                                                                                                                                                                                                                                                                                                                                                                                                                                                       |

|                                 |                                                                                                                                                                                                                             |    |                                                                                                                                                                                                                                                                                                                                                                                                                                                                                                                                                                                                                                                                                                                                                                                                                                                                                                                                                                        |
|---------------------------------|-----------------------------------------------------------------------------------------------------------------------------------------------------------------------------------------------------------------------------|----|------------------------------------------------------------------------------------------------------------------------------------------------------------------------------------------------------------------------------------------------------------------------------------------------------------------------------------------------------------------------------------------------------------------------------------------------------------------------------------------------------------------------------------------------------------------------------------------------------------------------------------------------------------------------------------------------------------------------------------------------------------------------------------------------------------------------------------------------------------------------------------------------------------------------------------------------------------------------|
|                                 | treatment, care, rehabilitation and health promotion                                                                                                                                                                        |    |                                                                                                                                                                                                                                                                                                                                                                                                                                                                                                                                                                                                                                                                                                                                                                                                                                                                                                                                                                        |
| Shared decision making          | A collaborative process that allows patients and their providers to make health care <b>decisions</b> together, taking into account the best scientific evidence available, as well as the patient's values and preferences | 14 | <ul style="list-style-type: none"> <li>- Educational intervention for patients and carers (end-of-life care, paediatric care) (199, 200)</li> <li>- Improving healthcare professionals skills (e.g. communication in cancer, performance in nursing homes, recognition and management of deteriorating patients, genetic education) (201)</li> <li>- Promoting adoption of Shared Decision Making (202, 203)</li> <li>- Reducing medication and over prescription (antibiotic use, opioid prescription, administration errors in children and adults, inappropriate prescribing in elderly) (204)</li> <li>- Shared decision making in pregnancy and delivery, treatment in older people and cancer screening (205-212)</li> </ul>                                                                                                                                                                                                                                     |
| Packages of care                | Integrated packages of care such as the Integrated Management of Childhood Illness (IMCI)                                                                                                                                   | 1  | <ul style="list-style-type: none"> <li>- Care delivery models/disease management (e.g. in dementia and other mental health conditions, elderly inpatients, epilepsy, asthma, HIV, heart failure, chronic cough in children, antenatal care) (213)</li> </ul>                                                                                                                                                                                                                                                                                                                                                                                                                                                                                                                                                                                                                                                                                                           |
| Case management                 | Use of individuals, often specially trained nurses, to coordinate care for patients with multiple or complex needs                                                                                                          | 14 | <ul style="list-style-type: none"> <li>- Advance care planning (e.g., haemodialysis patients, palliative care, end-of-life interventions) (214-217)</li> <li>- Integrated care models (e.g. chronic diseases, specifically CVD, diabetes type 2, cancer, childhood obesity, haemophilia, mental health, multi-morbidities, chronic viral hepatitis) (218)</li> <li>- Outpatient case management (e.g. complex care needs, dementia and other mental disorders, CVD) (219-227)</li> </ul>                                                                                                                                                                                                                                                                                                                                                                                                                                                                               |
| Disease management              | Programs designed to manage or prevent a chronic condition using a systematic approach to care and potentially employing multiple ways of influencing patients, providers or the process of care                            | 16 | <ul style="list-style-type: none"> <li>- Adolescent-specific prenatal interventions on improving attendance and reducing harm during and after birth (228)</li> <li>- Care delivery models/disease management (e.g. in dementia and other mental health conditions, elderly inpatients, epilepsy, asthma, HIV, heart failure, chronic cough in children, antenatal care) (229-235)</li> <li>- Chronic Disease Management – asthma (236)</li> <li>- Improving healthcare professionals skills (e.g. communication in cancer, performance in nursing homes, recognition and management of deteriorating patients, genetic education) (237-242)</li> <li>- Outpatient management of cardio-metabolic risk factor control in people with diabetes (243)</li> </ul>                                                                                                                                                                                                         |
| Care pathways                   | Strategies to link evidence to practice for specific health conditions. These strategies detail the local structure, systems and time-frames to address recommendations                                                     | 8  | <ul style="list-style-type: none"> <li>- Advanced care planning (244)</li> <li>- Care delivery models/disease management (245)</li> <li>- Critical Care path (e.g. head and neck cancer surgery, after discharge from an ICU) (246, 247)</li> <li>- Interventions to improve linkage with or retention in HIV services (248-250)</li> <li>- Rapid response systems to reduce hospital mortality (251)</li> </ul>                                                                                                                                                                                                                                                                                                                                                                                                                                                                                                                                                       |
| Teams                           | Care provided by teams or interdisciplinary collaboration                                                                                                                                                                   | 22 | <ul style="list-style-type: none"> <li>- Care delivery models/disease management (e.g. in dementia and other mental health conditions, elderly inpatients, epilepsy, asthma, HIV, heart failure, chronic cough in children, antenatal care) (252)</li> <li>- Integrated care models (e.g. chronic diseases, specifically CVD, diabetes type 2, cancer, childhood obesity, haemophilia, mental health, multi-morbidities, chronic viral hepatitis) (253)</li> <li>- Interventions to promote work participation in people with regional musculoskeletal pain (254)</li> <li>- Multidisciplinary team care (e.g. chronic care, specifically RA, mental illness and crisis resolution, chronic kidney disease; trauma in elderly, palliative care in cancer, acute care, secondary fracture prevention, geriatric care, rehabilitation, end of life care, paediatric feeding disorders) (255-272)</li> <li>- Multidisciplinary team care (neonatal care) (273)</li> </ul> |
| Communication between providers | Systems or strategies for communication between health care providers                                                                                                                                                       | 6  | <ul style="list-style-type: none"> <li>- Improving clinical communication in hospitals, between primary and secondary care (274-277)</li> <li>- Improving patient handovers from hospital to primary care and vice versa (278, 279)</li> </ul>                                                                                                                                                                                                                                                                                                                                                                                                                                                                                                                                                                                                                                                                                                                         |
| Transition of care              | Interventions to improve transition from one care                                                                                                                                                                           | 7  | <ul style="list-style-type: none"> <li>- Transition from paediatrics to adults care (e.g. diabetes, mental health, RMDs, special health care needs) (280-286)</li> </ul>                                                                                                                                                                                                                                                                                                                                                                                                                                                                                                                                                                                                                                                                                                                                                                                               |

|                                                         |                                                                                                                                                                                                   |     |                                                                                                                                                                                                                                                                                                                                                                                                                                                                                                                                                                                                                                                                                                                                                                                                                                                                                                                                                                                    |
|---------------------------------------------------------|---------------------------------------------------------------------------------------------------------------------------------------------------------------------------------------------------|-----|------------------------------------------------------------------------------------------------------------------------------------------------------------------------------------------------------------------------------------------------------------------------------------------------------------------------------------------------------------------------------------------------------------------------------------------------------------------------------------------------------------------------------------------------------------------------------------------------------------------------------------------------------------------------------------------------------------------------------------------------------------------------------------------------------------------------------------------------------------------------------------------------------------------------------------------------------------------------------------|
|                                                         | provider to another                                                                                                                                                                               |     |                                                                                                                                                                                                                                                                                                                                                                                                                                                                                                                                                                                                                                                                                                                                                                                                                                                                                                                                                                                    |
| Discharge planning                                      | Systems for planning the discharge of patients from facilities                                                                                                                                    | 18  | <ul style="list-style-type: none"> <li>- (Early) supported Dis plan (e.g. acute stroke, COPD, elderly patients, children with cancer and febrile neutropenia) (287-298)</li> <li>- Fast-track surgery programs (liver surgery) (299-301)</li> <li>- Providing written information to reduce re-admissions in heart failure (302)</li> <li>- Transitional care management after hospital discharge to reduce 30-days readmission rates (303, 304)</li> </ul>                                                                                                                                                                                                                                                                                                                                                                                                                                                                                                                        |
| <b>Information and communication technology (n=189)</b> |                                                                                                                                                                                                   |     |                                                                                                                                                                                                                                                                                                                                                                                                                                                                                                                                                                                                                                                                                                                                                                                                                                                                                                                                                                                    |
| Health information systems                              | Health record and health management systems to store and manage patient health information, for example electronic patient records, or systems for recalling patients for follow-up or prevention | 13  | <ul style="list-style-type: none"> <li>- Health notes vs EMR in pregnancy (305, 306)</li> <li>- Interventions to improve attendance of appointments (307-309)</li> <li>- Interventions to increase vaccine uptake (elderly, children) (310)</li> <li>- Paediatric track and trigger systems for hospitalised children (311)</li> <li>- Patient safety interventions (312)</li> <li>- Recall intervals (dental visits, women with history of gestational diabetes, TB appointments) (313-315)</li> <li>- Reminder interventions to improve treatment adherence (316)</li> <li>- The Use of Medical Scribes in Health Care Settings (317)</li> </ul>                                                                                                                                                                                                                                                                                                                                 |
| The use of information and communication technology     | Technology based methods to transfer healthcare information and support the delivery of care.                                                                                                     | 13  | <ul style="list-style-type: none"> <li>- Computerized clinical decision support to enable patient-centred care (nutrition informatics, advice on drug dosage) (318)</li> <li>- Medication organization devices (319-321)</li> <li>- Medication reconciliation interventions at hospital (322)</li> <li>- Multimedia educational interventions for consumers about prescribed and over-the-counter medications (323)</li> <li>- Patient portals (324, 325)</li> <li>- Reducing inappropriate imaging and testing (e.g. cardiac, low-back pain imaging, lab tests ordering by GPs) (326)</li> <li>- Reducing medication and over-prescription (antibiotic use, opioid prescription, administration errors in children and adults, inappropriate prescribing in elderly) (327)</li> <li>- Serious games for professional training and patient education (e.g. chronic diseases, mental health) (328, 329)</li> <li>- Telehealth (range of intervention types) (330)</li> </ul>        |
| Smart home technologies                                 | Electronic assistive technologies                                                                                                                                                                 | 1   | <ul style="list-style-type: none"> <li>- Remote monitoring (e.g. after recent hospital discharge with heart failure, in elderly, asthma) (331)</li> </ul>                                                                                                                                                                                                                                                                                                                                                                                                                                                                                                                                                                                                                                                                                                                                                                                                                          |
| Telemedicine                                            | Exchange of healthcare information from one site to another via electronic communication                                                                                                          | 162 | <ul style="list-style-type: none"> <li>- Self-care apps (332-352)</li> <li>- Social media (353)</li> <li>- Social networks (354-356)</li> <li>- Telecoaching (357-359)</li> <li>- Telecoaching (automated telephone messaging) (360-362)</li> <li>- Telecoaching (peer support programs) (363)</li> <li>- Telecoaching (telephone counselling) (364-373)</li> <li>- Telecoaching (web-based programs) (374-422)</li> <li>- Telehealth (423)</li> <li>- Telehealth (email communication) (424-426)</li> <li>- Telehealth (mobile phone messaging) (427-437)</li> <li>- Telehealth (mobile phone technology) (438, 439)</li> <li>- Telehealth (mobile phone) (440)</li> <li>- Telehealth (mobile technology) (441)</li> <li>- Telehealth (range of intervention types) (442-464)</li> <li>- Telehealth (telemonitoring)(465-473)</li> <li>- Telemedicine (474-486)</li> <li>- Telemedicine (screening) (487, 488)</li> <li>- Telemedicine (tele-rehabilitation) (489-493)</li> </ul> |
| <b>Goal-focused reviews (n=38)</b>                      |                                                                                                                                                                                                   |     |                                                                                                                                                                                                                                                                                                                                                                                                                                                                                                                                                                                                                                                                                                                                                                                                                                                                                                                                                                                    |
| Interventions to address social determinants of         |                                                                                                                                                                                                   | 14  | <ul style="list-style-type: none"> <li>- Culturally appropriate prevention and care (494-502)</li> <li>- Eliminating repeat unintended pregnancy in teenagers (503)</li> <li>- Improving access for homeless (504)</li> <li>- Interventions to address social determinants of health (505-507)</li> </ul>                                                                                                                                                                                                                                                                                                                                                                                                                                                                                                                                                                                                                                                                          |

|                                                               |  |     |                                                                                                                           |
|---------------------------------------------------------------|--|-----|---------------------------------------------------------------------------------------------------------------------------|
| health                                                        |  |     |                                                                                                                           |
| Improving medication adherence                                |  | 11  | - Improving medication adherence (e.g. chronic diseases, specifically diabetes, HIV, CVD; in ethnic minorities) (508-518) |
| Addressing multimorbidity in primary care                     |  | 1   | - Addressing multimorbidity in primary care (519)                                                                         |
| Preventing readmissions                                       |  | 1   | - Preventing 30-Day Hospital Readmissions (520)                                                                           |
| Reducing inappropriate imaging and testing                    |  | 3   | - Reducing inappropriate imaging and testing (e.g. cardiac, low-back pain imaging, lab tests ordering by GPs) (521-523)   |
| Meeting family needs of the critically ill                    |  | 1   | - Meeting family needs of critically ill patients in an ICU (524)                                                         |
| Communicating contraceptive effectiveness                     |  | 1   | - Communicating contraceptive effectiveness (525)                                                                         |
| Improving adherence to treatment                              |  | 2   | - Improving adherence to treatment (children with chronic diseases, adult heart transplant patients) (526, 527)           |
| Interventions to increase retention in mental health services |  | 1   | - Interventions to increase retention in mental health services (528)                                                     |
| Interventions to increase vaccine uptake (elderly, children)  |  | 3   | - Interventions to increase vaccine uptake (elderly, children) (529-531)                                                  |
| Total                                                         |  | 531 |                                                                                                                           |

## References

1. Moe J, Kirkland S, Rawe E, Ospina MB, Vandermeer B, Campbell S, et al. Effectiveness of Interventions to Decrease Emergency Department Visits by Adult Frequent Users: A systematic review. *Academic emergency medicine : official journal of the Society for Academic Emergency Medicine*. 2017;24(1):40-52.
2. Raven MC, Kushel M, Ko MJ, Penko J, Bindman AB. The Effectiveness of Emergency Department Visit Reduction Programs: A Systematic Review. *Annals of emergency medicine*. 2016;68(4):467-83.e15.
3. Elder E, Johnston AN, Crilly J. Review article: systematic review of three key strategies designed to improve patient flow through the emergency department. *Emerg Med Australas*. 2015;27(5):394-404.
4. van Galen LS, Lammers EM, Schoonmade LJ, Alam N, Kramer MH, Nanayakkara PW. Acute medical units: The way to go? A literature review. *Eur J Intern Med*. 2017;39:24-31.
5. Ballini L, Negro A, Maltoni S, Vignatelli L, Flodgren G, Simera I, et al. Interventions to reduce waiting times for elective procedures. *Cochrane Database Syst Rev*. 2015(2):CD005610.
6. Chen CE, Chen CT, Hu J, Mehrotra A. Walk-in clinics versus physician offices and emergency rooms for urgent care and chronic disease management. *Cochrane Database Syst Rev*. 2017;2:CD011774.
7. Whear R, Abdul-Rahman AK, Boddy K, Thompson-Coon J, Perry M, Stein K. The clinical effectiveness of patient initiated clinics for patients with chronic or recurrent conditions managed in secondary care: a systematic review. *PLoS One*. 2013;8(10):e74774.
8. Booth A, Cantrell A, Preston L, Chambers D, Goyder E. What is the evidence for the effectiveness, appropriateness and feasibility of group clinics for patients with chronic conditions? A systematic review 2015 2015/12/None.
9. Carter EB, Temming LA, Akin J, Fowler S, Macones GA, Colditz GA, et al. Group Prenatal Care Compared With Traditional Prenatal Care: A Systematic Review and Meta-analysis. *Obstet Gynecol*. 2016;128(3):551-61.
10. Catling CJ, Medley N, Foureux M, Ryan C, Leap N, Teate A, et al. Group versus conventional antenatal care for women. *Cochrane Database Syst Rev*. 2015(2):CD007622.
11. O'Keeffe M, Hayes A, McCreesh K, Purtill H, O'Sullivan K. Are group-based and individual physiotherapy exercise programmes equally effective for musculoskeletal conditions? A systematic review and meta-analysis. *Br J Sports Med*. 2017;51(2):126-32.
12. Quiñones AR, Richardson J, Freeman M, Fu R, O'Neil ME, Motu'apuaka M, et al. Educational group visits for the management of chronic health conditions: a systematic review. *Patient education and counseling*. 2014;95(1):3-29.
13. Stock SJ, Bricker L, Norman JE, West HM. Immediate versus deferred delivery of the preterm baby with suspected fetal compromise for improving outcomes. *Cochrane Database Syst Rev*. 2016;7:CD008968.
14. Forman-Hoffman VL, Middleton JC, McKeeman JL, Stambaugh LF, Christian RB, Gaynes BN, et al. Strategies To Improve Mental Health Care for Children and Adolescents 2016 2016/12/None.
15. Petit Dit Dariel O, Regnaud JP. Do Magnet®-accredited hospitals show improvements in nurse and patient outcomes compared to non-Magnet hospitals: a systematic review. *JBHI database of systematic reviews and implementation reports*. 2015;13(6):168-219.
16. Pasricha A, Deinstadt RT, Moher D, Killoran A, Rourke SB, Kendall CE. Chronic Care Model Decision Support and Clinical Information Systems interventions for people living with HIV: a systematic review. *J Gen Intern Med*. 2013;28(1):127-35.
17. Howe-Heyman A, Lutenbacher M. The Baby-Friendly Hospital Initiative as an Intervention to Improve Breastfeeding Rates: A Review of the Literature. *Journal of midwifery & women's health*. 2016;61(1):77-102.
18. Christensen M, Lundh A. Medication review in hospitalised patients to reduce morbidity and mortality. *Cochrane Database Syst Rev*. 2016;2:CD008986.

19. Algie CM, Mahar RK, Wasiak J, Batty L, Gruen RL, Mahar PD. Interventions for reducing wrong-site surgery and invasive clinical procedures. *Cochrane Database Syst Rev.* 2015(3):CD009404.
20. Bailey E, Tickle M, Campbell S, O'Malley L. Systematic review of patient safety interventions in dentistry. *BMC oral health.* 2015;15(1):152.
21. Fudickar A, Horle K, Wiltfang J, Bein B. The effect of the WHO Surgical Safety Checklist on complication rate and communication. *Dtsch Arztebl Int.* 2012;109(42):695-701.
22. Lyons VE, Popejoy LL. Meta-analysis of surgical safety checklist effects on teamwork, communication, morbidity, mortality, and safety. *West J Nurs Res.* 2014;36(2):245-61.
23. Ojeleye O, Avery, A., Gupta, V. and Boyd, M. The evidence for the effectiveness of safety alerts in electronic patient medication record systems at the point of pharmacy order entry: a systematic review. *BMC medical informatics and decision making.* 2013.
24. Thomassen O, Storesund A, Softeland E, Brattebo G. The effects of safety checklists in medicine: a systematic review. *Acta Anaesthesiol Scand.* 2014;58(1):5-18.
25. Srigley JA, Furness CD, Gardam M. Interventions to improve patient hand hygiene: a systematic review. *J Hosp Infect.* 2016;94(1):23-9.
26. Blackwood B, Burns K.E.A, Cardwell C.R. and O'Halloran, P. Protocolized versus non-protocolized weaning for reducing the duration of mechanical ventilation in critically ill adult patients. *Cochrane Database of Systematic Reviews.* 2014.
27. Fiander M, McGowan, J., Grad, R., Pluye, P., Hannes, K., Labrecque, M., Roberts, N. W., Salzwedel, D. M., Welch, V. and Tugwell, P. Interventions to increase the use of electronic health information by healthcare practitioners to improve clinical practice and patient outcomes. *Cochrane Database of Systematic Reviews.* 2015.
28. Okelo SO, Butz AM, Sharma R, Diette GB, Pitts SI, King TM, et al. Interventions to Modify Health Care Provider Adherence to Asthma Guidelines 2013/05/None.
29. Omran D, Guirguis LM, Simpson SH. Systematic Review of Pharmacist Interventions to Improve Adherence to Oral Antidiabetic Medications in People with Type 2 Diabetes. *Canadian Journal of Diabetes.* 2012;36(5):292-9.
30. McPheeters ML, Kripalani S, Peterson NB, Idowu RT, Jerome RN, Potter SA, et al. Closing the quality gap: revisiting the state of the science (vol. 3: quality improvement interventions to address health disparities). *Evidence report/technology assessment.* 2012(208.3):1-475.
31. Thaker A, Navadeh S, Gonzales H, Malekinejad M. Effectiveness of Policies on Reducing Exposure to Ionizing Radiation From Medical Imaging: A Systematic Review. *J Am Coll Radiol.* 2015;12(12 Pt B):1434-45.
32. Alldred DP, Kennedy MC, Hughes C, Chen TF, Miller P. Interventions to optimise prescribing for older people in care homes. *Cochrane Database Syst Rev.* 2016;2:CD009095.
33. Bannan DF, Tully MP. Bundle interventions used to reduce prescribing and administration errors in hospitalized children: a systematic review. *J Clin Pharm Ther.* 2016;41(3):246-55.
34. Clyne B, Fitzgerald C, Quinlan A, Hardy C, Galvin R, Fahey T, et al. Interventions to Address Potentially Inappropriate Prescribing in Community-Dwelling Older Adults: A Systematic Review of Randomized Controlled Trials. *J Am Geriatr Soc.* 2016;64(6):1210-22.
35. Davey P, Marwick CA, Scott CL, Charani E, McNeil K, Brown E, et al. Interventions to improve antibiotic prescribing practices for hospital inpatients. *Cochrane Database Syst Rev.* 2017;2:CD003543.
36. Kaufmann J, Laschat M, Wappler F. Medication errors in pediatric emergencies: a systematic analysis. *Dtsch Arztebl Int.* 2012;109(38):609-16.
37. Keers RN, Williams SD, Cooke J, Walsh T, Ashcroft DM. Impact of interventions designed to reduce medication administration errors in hospitals: a systematic review. *Drug safety : an international journal of medical toxicology and drug experience.* 2014;37(5):317-32.
38. Maaskant JM, Vermeulen H, Apampa B, Fernando B, Ghaleb MA, Neubert A, et al. Interventions for reducing medication errors in children in hospital. *Cochrane Database Syst Rev.* 2015(3):CD006208.



39. Manias E, Williams A, Liew D. Interventions to reduce medication errors in adult intensive care: a systematic review. *Br J Clin Pharmacol*. 2012;74(3):411-23.
40. Patterson SM, Cadogan CA, Kerse N, Cardwell CR, Bradley MC, Ryan C, et al. Interventions to improve the appropriate use of polypharmacy for older people. *Cochrane Database Syst Rev*. 2014(10):CD008165.
41. Spurling GK, Del Mar CB, Dooley L, Foxlee R, Farley R. Delayed antibiotics for respiratory infections. *Cochrane Database Syst Rev*. 2013(4):CD004417.
42. van der Velden AW, Pijpers, E. J., Kuyvenhoven, M. M., Tonkin-Crine, S. K., Little, P. and Verheij, T. J. Effectiveness of physician-targeted interventions to improve antibiotic use for respiratory tract infections. *The British journal of general practice : the journal of the Royal College of General Practitioners*. 2012.
43. Windmill J, Fisher E, Eccleston C, Derry S, Stannard C, Knaggs R, et al. Interventions for the reduction of prescribed opioid use in chronic non-cancer pain. *Cochrane Database Syst Rev*. 2013(9):CD010323.
44. Zhang YZaS, S. Antibiotic stewardship programmes in intensive care units: Why, how, and where are they leading us. *World journal of critical care medicine*. 2015.
45. Silva MD, Genoff, M., Zaballa, A., Jewell, S., Stabler, S., Gany, F. M. and Diamond, L. C. Interpreting at the End of Life: A Systematic Review of the Impact of Interpreters on the Delivery of Palliative Care Services to Cancer Patients with Limited English Proficiency. *Journal of pain and symptom management*. 2015.
46. Rowe BH, Guo X, Villa-Roel C, Schull M, Holroyd B, Bullard M, et al. The role of triage liaison physicians on mitigating overcrowding in emergency departments: a systematic review. *Acad Emerg Med*. 2012;18(2):111-20.
47. Curley LE, Moody J, Gobarani R, Aspden T, Jensen M, McDonald M, et al. Is there potential for the future provision of triage services in community pharmacy? *Journal of pharmaceutical policy and practice*. 2016.
48. Jaafar SH, Ho JJ, Lee KS. Rooming-in for new mother and infant versus separate care for increasing the duration of breastfeeding. *Cochrane Database Syst Rev*. 2016(8):CD006641.
49. Abdel-Aleem H, El-Gibaly OM, El-Gazzar AF, Al-Attar GS. Mobile clinics for women's and children's health. *Cochrane Database Syst Rev*. 2016(8):CD009677.
50. Arrich J, Holzer M, Havel C, Warenits AM, Herkner H. Pre-hospital versus in-hospital initiation of cooling for survival and neuroprotection after out-of-hospital cardiac arrest. *Cochrane Database Syst Rev*. 2016;3:CD010570.
51. Baishnab E, Karner C. Primary care based clinics for asthma. *Cochrane Database Syst Rev*. 2012(4):Cd003533.
52. Balaguer A, Gonzalez de Dios J. Home versus hospital intravenous antibiotic therapy for cystic fibrosis. *Cochrane Database Syst Rev*. 2015(12):CD001917.
53. Behan C, Masterson S, Clarke M. Systematic review of the evidence for service models delivering early intervention in psychosis outside the stand-alone centre. *Early Interv Psychiatry*. 2017;11(1):3-13.
54. Brown L, Forster A, Young J, Crocker T, Benham A, Langhorne P, et al. Medical day hospital care for older people versus alternative forms of care. *Cochrane Database Syst Rev*. 2015(6):CD001730.
55. Caplan GA, Sulaiman NS, Mangin DA, Aimonino Ricauda N, Wilson AD, Barclay L. A meta-analysis of "hospital in the home". *The Medical journal of Australia*. 2012;197(9):512-9.
56. Hodnett ED, Downe, S., Walsh, D. Alternative versus conventional institutional settings for birth. *Cochrane Database of Systematic Reviews*. 2012.
57. Ishani A, Slinin Y, Greer N, MacDonald R, Messina J, Rutks I, et al. Comparative Effectiveness of Home-Based Kidney Dialysis Versus In-Center or Other Outpatient Kidney Dialysis Locations – A Systematic Review 2015 2015/04/None.



58. Jeppesen E BK, Vist GE, Wedzicha JA, Wright JJ, Greenstone M, Walters JA. Hospital at home for acute exacerbations of chronic obstructive pulmonary disease. *Cochrane Database of Systematic Reviews*. 2012.
59. Kelly AJ, Alfrevic Z, Ghosh A. Outpatient versus inpatient induction of labour for improving birth outcomes. *Cochrane Database Syst Rev*. 2013(11):CD007372.
60. Lawrence D, Fedorowicz Z, van Zuuren EJ. Day care versus in-patient surgery for age-related cataract. *Cochrane Database Syst Rev*. 2015(11):Cd004242.
61. MacIntyre EJ, Asadi L, McKim DA, Bagshaw SM. Clinical Outcomes Associated with Home Mechanical Ventilation: A Systematic Review. *Canadian respiratory journal*. 2016;2016(no pagination):6547180.
62. Malwade US, Jardine LA. Home- versus hospital-based phototherapy for the treatment of non-haemolytic jaundice in infants at more than 37 weeks' gestation. *Cochrane Database Syst Rev*. 2014(6):CD010212.
63. McCaul M, Lourens A, Kredo T. Pre-hospital versus in-hospital thrombolysis for ST-elevation myocardial infarction. *Cochrane Database Syst Rev*. 2014(9):CD010191.
64. Neves LF, Reis MH, Goncalves TR. Home or community-based pulmonary rehabilitation for individuals with chronic obstructive pulmonary disease: a systematic review and meta-analysis. *Cad Saude Publica*. 2016;32(6).
65. Nordly M, Vadstrup ES, Sjøgren P, Kurita GP. Home-based specialized palliative care in patients with advanced cancer: A systematic review. *Palliative & supportive care*. 2016;14(6):1-12.
66. Olsen O, Clausen JA. Planned hospital birth versus planned home birth. *Cochrane Database Syst Rev*. 2012(9):CD000352.
67. Palmer SC, Palmer AR, Craig JC, Johnson DW, Stroumza P, Frantzen L, et al. Home versus in-centre haemodialysis for end-stage kidney disease. *Cochrane Database Syst Rev*. 2014(11):Cd009535.
68. Parab CS, Cooper C, Woolfenden S, Piper SM. Specialist home-based nursing services for children with acute and chronic illnesses. *Cochrane Database Syst Rev*. 2013(6):CD004383.
69. Parker G, Spiers G, Gridley K, Atkin K, Birks Y, Lowson K, et al. Systematic review of international evidence on the effectiveness and costs of paediatric home care for children and young people who are ill. *Child: care, health and development*. 2013;39(1):1-19.
70. Abou El Senoun G, Dowswell T, Mousa HA. Planned home versus hospital care for preterm prelabour rupture of the membranes (PPROM) prior to 37 weeks' gestation. *Cochrane Database Syst Rev*. 2014(4):CD008053.
71. Shepperd S, Gonçalves?Bradley DC, Straus SE, Wee B. Hospital at home: home-based end-of-life care. *Cochrane Database of Systematic Reviews*. 2016.
72. Shepperd S, Iliffe S, Doll HA, Clarke MJ, Kalra L, Wilson AD, et al. Admission avoidance hospital at home. *Cochrane Database of Systematic Reviews*. 2016.
73. Totten AM, White-Chu EF, Wasson N, Morgan E, Kansagara D, Davis-O'Reilly C, et al. Home-Based Primary Care Interventions 2016 2016/02/None.
74. Veale D, Naismith I, Miles S, Gledhill LJ, Stewart G, Hodsoll J. Outcomes for residential or inpatient intensive treatment of obsessive-compulsive disorder: A systematic review and meta-analysis. *Journal of Obsessive-Compulsive and Related Disorders*. 2016;8:38-49.
75. Vinson DR, Zehtabchi S, Yealy DM. Can selected patients with newly diagnosed pulmonary embolism be safely treated without hospitalization? A systematic review. *Annals of emergency medicine*. 2012;60(5):651-62.e4.
76. Wong CX, Carson KV, Smith BJ. Home care by outreach nursing for chronic obstructive pulmonary disease. *Cochrane Database Syst Rev*. 2012(4):CD000994.
77. Yoo HH, Queluz TH, El Dib R. Outpatient versus inpatient treatment for acute pulmonary embolism. *Cochrane Database Syst Rev*. 2014(11):CD010019.
78. Zondag W, Kooiman J, Klok FA, Dekkers OM, Huisman MV. Outpatient versus inpatient treatment in patients with pulmonary embolism: a meta-analysis. *Eur Respir J*. 2013;42(1):134-44.

79. Ansari S, Boyle A. Emergency department-based interventions for women suffering domestic abuse: a critical literature review. *Eur J Emerg Med*. 2017;24(1):13-8.
80. da Silva Soares D, Nunes CM, Gomes B. Effectiveness of Emergency Department Based Palliative Care for Adults with Advanced Disease: A Systematic Review. *J Palliat Med*. 2016;19(6):601-9.
81. Landy MS, Davey CJ, Quintero D, Pecora A, McShane KE. A Systematic Review on the Effectiveness of Brief Interventions for Alcohol Misuse among Adults in Emergency Departments. *Journal of substance abuse treatment*. 2015;61:1-12.
82. Abbott LS, Elliott LT. Eliminating Health Disparities through Action on the Social Determinants of Health: A Systematic Review of Home Visiting in the United States, 2005-2015. *Public health nursing (Boston, Mass)*. 2017;34(1):2-30.
83. Avellar SA, Supplee LH. Effectiveness of home visiting in improving child health and reducing child maltreatment. *Pediatrics*. 2013;132 Suppl 2:S90-9.
84. Filene JH, Kaminski JW, Valle LA, Cachat P. Components associated with home visiting program outcomes: a meta-analysis. *Pediatrics*. 2013;132 Suppl 2:S100-9.
85. Peacock S, Konrad S, Watson E, Nickel D, Muhajarine N. Effectiveness of home visiting programs on child outcomes: a systematic review. *BMC Public Health*. 2013;13:17.
86. Prosmán G-J, Wong SHLF, van der Wouden JC, Lagro-Janssen ALM. Effectiveness of home visiting in reducing partner violence for families experiencing abuse: A systematic review. *Family Practice*. 2015;32(3).
87. Turnbull C OD. Home visits during pregnancy and after birth for women with an alcohol or drug problem. *Cochrane Database of Systematic Reviews*. 2012.
88. Cochrane A, Furlong M, McGilloway S, Molloy DW, Stevenson M, Donnelly M. Time-limited home-care reablement services for maintaining and improving the functional independence of older adults. *Cochrane Database Syst Rev*. 2016;10:CD010825.
89. Florez-Garcia M, Garcia-Perez F, Curbelo R, Perez-Porta I, Nishishinya B, Rosario Lozano MP, et al. Efficacy and safety of home-based exercises versus individualized supervised outpatient physical therapy programs after total knee arthroplasty: a systematic review and meta-analysis. *Knee Surg Sports Traumatol Arthrosc*. 2017;25(11):3340-53.
90. Legg L, Gladman J, Drummond A, Davidson A. A systematic review of the evidence on home care reablement services. *Clin Rehabil*. 2016;30(8):741-9.
91. Showell NN, Fawole O, Segal J, Wilson RF, Cheskin LJ, Bleich SN, et al. A systematic review of home-based childhood obesity prevention studies. *Pediatrics*. 2013;132(1):e193-200.
92. Li D, Yang Z, Kang P, Xie X. Home-Based Compared with Hospital-Based Rehabilitation Program for Patients Undergoing Total Knee Arthroplasty for Osteoarthritis: A Systematic Review and Meta-analysis of Randomized Controlled Trials. *American journal of physical medicine & rehabilitation / Association of Academic Physiatrists*. 2016;96(6):440-7.
93. Williams JW, Jackson GL, Powers BJ, Chatterjee R, Bettger JP, Kemper AR, et al. Closing the quality gap: revisiting the state of the science (vol. 2: the patient-centered medical home). *Evidence report/technology assessment*. 2012(208.2):1-210.
94. Smyth MA, Brace-McDonnell SJ, Perkins GD. Impact of Prehospital Care on Outcomes in Sepsis: A Systematic Review. *West J Emerg Med*. 2016;17(4):427-37.
95. Denno DM, Chandra-Mouli V, Osman M. Reaching youth with out-of-facility HIV and reproductive health services: a systematic review. *J Adolesc Health*. 2012;51(2):106-21.
96. Bains RM, Diallo AF. Mental Health Services in School-Based Health Centers: Systematic Review. *J Sch Nurs*. 2016;32(1):8-19.
97. Knopf JA, Finnie RK, Peng Y, Hahn RA, Truman BI, Vernon-Smile M, et al. School-Based Health Centers to Advance Health Equity: A Community Guide Systematic Review. *American journal of preventive medicine*. 2016;51(1):114-26.

98. Capone G, Schroder, T., Clarke, S. and Braham, L. Outcomes of therapeutic community treatment for personality disorder. *Therapeutic Communities: The International Journal of Therapeutic Communities*. 2016;37(2):84-100.
99. Magor-Blatch L, Bhullar N, Thomson B, Thorsteinsson E. A systematic review of studies examining effectiveness of therapeutic communities. *Therapeutic Communities*. 2014;35(4).
100. Long L, Abraham C, Paquette R, Shahmanesh M, Llewellyn C, Townsend A, et al. Brief interventions to prevent sexually transmitted infections suitable for in-service use: A systematic review. *Preventive medicine*. 2016;91:364-82.
101. Yin Ling W, Maria, K., Andrew, B., Thomas, E. and Heather, O. D. Centralisation of services for gynaecological cancer. *Cochrane Database of Systematic Reviews*. 2012.
102. Galvagno Jr SM, Sikorski, R., Hirshon, J. M., Floccare, D., Stephens, C., Beecher, D. and Thomas, S. Helicopter emergency medical services for adults with major trauma. *Cochrane Database of Systematic Reviews*. 2015.
103. Donald F, Martin-Misener R, Carter N, Donald EE, Kaasalainen S, Wickson-Griffiths A, et al. A systematic review of the effectiveness of advanced practice nurses in long-term care. *Journal of advanced nursing*. 2013;69(10):2148-61.
104. Morilla-Herrera JC, Garcia-Mayor S, Martín-Santos FJ, Kaknani Uttumchandani S, Leon Campos Á, Caro Bautista J, et al. A systematic review of the effectiveness and roles of advanced practice nursing in older people. *International journal of nursing studies*. 2015;53:290-307.
105. Jayaraman S, Sethi D, Wong R. Advanced training in trauma life support for ambulance crews. *Cochrane Database of Systematic Reviews*. 2014(8).
106. Jayaraman S, Sethi D, Chinnock P, Wong R. Advanced trauma life support training for hospital staff. *Cochrane Database Syst Rev*. 2014(8):CD004173.
107. Leung P, Orgeta V, Orrell M. The effects on carer well-being of carer involvement in cognition-based interventions for people with dementia: a systematic review and meta-analysis. *Int J Geriatr Psychiatry*. 2017;32(4):372-85.
108. Bigham BL, Kennedy SM, Drennan I, Morrison LJ. Expanding paramedic scope of practice in the community: a systematic review of the literature. *Prehosp Emerg Care*. 2013;17(3):361-72.
109. Kim K, Choi JS, Choi E, Nieman CL, Joo JH, Lin FR, et al. Effects of Community-Based Health Worker Interventions to Improve Chronic Disease Management and Care Among Vulnerable Populations: A Systematic Review. *American journal of public health*. 2016;106(4):e1-e26.
110. Maravilla JC, Betts KS, Abajobir AA, Couto ECC, Alati R. The Role of Community Health Workers in Preventing Adolescent Repeat Pregnancies and Births. *J Adolesc Health*. 2016;59(4):378-90.
111. Patel S, Patel S. The Effectiveness of Lactation Consultants and Lactation Counselors on Breastfeeding Outcomes. *J Hum Lact*. 2016;32(3):530-41.
112. Barnard S, Kim C, Park MH, Ngo TD. Doctors or mid-level providers for abortion. *Cochrane Database Syst Rev*. 2015(7):CD011242.
113. Brocklehurst P, Mertz B, Jerkovic-Cosic K, Littlewood A, Tickle M. Direct access to midlevel dental providers: an evidence synthesis. *J Public Health Dent*. 2014;74(4):326-35.
114. Candelas G, Villaverde V, García S, Guerra M, León MJ, Cañete JD. Benefit of health education by a training nurse in patients with axial and/or peripheral psoriatic arthritis: A systematic literature review. *Rheumatology international*. 2016.
115. Creedon R, Byrne S, Kennedy J, McCarthy S. The impact of nurse prescribing on the clinical setting. *British journal of nursing (Mark Allen Publishing)*. 2015;24(17):878-85.
116. Day LW, Siao D, Inadomi JM, Somsouk M. Non-physician performance of lower and upper endoscopy: a systematic review and meta-analysis. *Endoscopy*. 2014;46(5):401-10.
117. Dyer TA, Brocklehurst P, Glenny AM, Davies L, Tickle M, Issac A, et al. Dental auxiliaries for dental care traditionally provided by dentists. *Cochrane Database Syst Rev*. 2014(8):CD010076.

118. Hines S, Munday J, Kynoch K. Effectiveness of nurse-led preoperative assessment services for elective surgery: a systematic review update. *JBI database of systematic reviews and implementation reports*. 2015;13(6):279-317.
119. Kilpatrick K, Reid K, Carter N, Donald F, Bryant-Lukosius D, Martin-Misener R, et al. A Systematic Review of the Cost-Effectiveness of Clinical Nurse Specialists and Nurse Practitioners in Inpatient Roles. *Nursing leadership (Toronto, Ont)*. 2015;28(3):56-76.
120. Kuethe MC, Vaessen-Verberne AA, Elbers RG, Van Aalderen WM. Nurse versus physician-led care for the management of asthma. *Cochrane Database Syst Rev*. 2013(2):CD009296.
121. Lewis SR, Nicholson A, Smith AF, Alderson P. Physician anaesthetists versus non-physician providers of anaesthesia for surgical patients. *Cochrane Database Syst Rev*. 2014(7):CD010357.
122. Martinez-Gonzalez NA, Tandjung R, Djalali S, Huber-Geismann F, Markun S, Rosemann T. Effects of physician-nurse substitution on clinical parameters: a systematic review and meta-analysis. *PLoS One*. 2014;9(2):e89181.
123. Ngo TD, Park MH, Free C. Safety and effectiveness of termination services performed by doctors versus midlevel providers: a systematic review and analysis. *Int J Womens Health*. 2013;5:9-17.
124. Nicholson A, Coldwell CH, Lewis SR, Smith AF. Nurse-led versus doctor-led preoperative assessment for elective surgical patients requiring regional or general anaesthesia. *Cochrane Database Syst Rev*. 2013(11):CD010160.
125. Parker D, Maresco-Pennisi D, Clifton K, Shams R, Young J. Practice nurse involvement in the management of adults with type 2 diabetes mellitus attending a general practice: results from a systematic review. *International journal of evidence-based healthcare*. 2016;14(2):41-52.
126. Renner RM, Brahmī, D. and Kapp, N. Who can provide effective and safe termination of pregnancy care? A systematic review. *BJOG : an international journal of obstetrics and gynaecology*. 2013.
127. Sandall J, Soltani H, Gates S, Shennan A, Devane D. Midwife-led continuity models versus other models of care for childbearing women. *Cochrane Database Syst Rev*. 2016;4:CD004667.
128. Snaterse M, Dobber J, Jepma P, Peters RJ, Ter Riet G, Boekholdt SM, et al. Effective components of nurse-coordinated care to prevent recurrent coronary events: a systematic review and meta-analysis. *Heart*. 2016;102(1):50-6.
129. Stephens M, Hourigan LF, Appleyard M, Ostapowicz G, Schoeman M, Desmond PV, et al. Non-physician endoscopists: A systematic review. *World J Gastroenterol*. 2015;21(16):5056-71.
130. Tho PC, Ang E. The effectiveness of patient navigation programs for adult cancer patients undergoing treatment: a systematic review. *JBI database of systematic reviews and implementation reports*. 2016;14(2):295-321.
131. Van Camp YP, Van Rompaey B, Elseviers MM. Nurse-led interventions to enhance adherence to chronic medication: systematic review and meta-analysis of randomised controlled trials. *Eur J Clin Pharmacol*. 2013;69(4):761-70.
132. Weeks G, George J, Maclure K, Stewart D. Non-medical prescribing versus medical prescribing for acute and chronic disease management in primary and secondary care. *Cochrane Database Syst Rev*. 2016;11:CD011227.
133. Wright JT, Graham F, Hayes C, Ismail AI, Noraian KW, Weyant RJ, et al. A systematic review of oral health outcomes produced by dental teams incorporating midlevel providers. *J Am Dent Assoc*. 2013;144(1):75-91.
134. Zhu QM, Liu J, Hu HY, Wang S. Effectiveness of nurse-led early discharge planning programmes for hospital inpatients with chronic disease or rehabilitation needs: a systematic review and meta-analysis. *J Clin Nurs*. 2015;24(19-20):2993-3005.
135. Zweers D, de Graaf E, Teunissen SC. Non-pharmacological nurse-led interventions to manage anxiety in patients with advanced cancer: A systematic literature review. *International journal of nursing studies*. 2015;56:102-13.

136. Martinez-Gonzalez NA, Djalali S, Tandjung R, Huber-Geismann F, Markun S, Wensing M, et al. Substitution of physicians by nurses in primary care: a systematic review and meta-analysis. *BMC Health Serv Res.* 2014;14:214.
137. Bryan AE, Arkowitz H. Meta-analysis of the effects of peer-administered psychosocial interventions on symptoms of depression. *Am J Community Psychol.* 2015;55(3-4):455-71.
138. MacArthur GJ, Harrison S, Caldwell DM, Hickman M, Campbell R. Peer-led interventions to prevent tobacco, alcohol and/or drug use among young people aged 11-21 years: a systematic review and meta-analysis. *Addiction (Abingdon, England).* 2015;111(3):391-407.
139. Pitt V, Lowe D, Hill S, Prictor M, Hetrick SE, Ryan R, et al. Consumer-providers of care for adult clients of statutory mental health services. *Cochrane Database Syst Rev.* 2013(3):CD004807.
140. Raphael JL, Rueda A, Lion KC, Giordano TP. The role of lay health workers in pediatric chronic disease: a systematic review. *Acad Pediatr.* 2013;13(5):408-20.
141. Stubbs B, Williams J, Shannon J, Gaughran F, Craig T. Peer support interventions seeking to improve physical health and lifestyle behaviours among people with serious mental illness: A systematic review. *International journal of mental health nursing.* 2016;25(6):484-95.
142. Al-Jumah KA, Qureshi NA. Impact of pharmacist interventions on patients' adherence to antidepressants and patient-reported outcomes: a systematic review. *Patient Prefer Adherence.* 2012;6:87-100.
143. Baroy J, Chung D, Frisch R, Apgar D, Slack MK. The impact of pharmacist immunization programs on adult immunization rates: A systematic review and meta-analysis. *Journal of the American Pharmacists Association : JAPhA.* 2016;56(4):418-26.
144. Brown TJ, Todd A, O'Malley CL, Moore HJ, Husband AK, Bamba C, et al. Community pharmacy interventions for public health priorities: a systematic review of community pharmacy-delivered smoking, alcohol and weight management interventions 2016 2016/03/None.
145. Davis EM, Packard KA, Jackevicius CA. The pharmacist role in predicting and improving medication adherence in heart failure patients. *Journal of managed care pharmacy : JMCP.* 2014;20(7):741-55.
146. Garcia-Cardenas V, Armour C, Benrimoj SJ, Martinez-Martinez F, Rotta I, Fernandez-Llimos F. Pharmacists' interventions on clinical asthma outcomes: a systematic review. *Eur Respir J.* 2016;47(4):1134-43.
147. Kang JE, Han NY, Oh JM, Jin HK, Kim HA, Son IJ, et al. Pharmacist-involved care for patients with heart failure and acute coronary syndrome: a systematic review with qualitative and quantitative meta-analysis. *J Clin Pharm Ther.* 2016;41(2):145-57.
148. Lindsey L, Husband A, Nazar H, Todd A. Promoting the early detection of cancer: A systematic review of community pharmacy-based education and screening interventions. *Cancer epidemiology.* 2015;39(5):673-81.
149. Mekonnen AB, McLachlan AJ, Brien JA. Effectiveness of pharmacist-led medication reconciliation programmes on clinical outcomes at hospital transitions: a systematic review and meta-analysis. *BMJ open.* 2016.
150. Mohammed MA, Moles RJ, Chen TF. Impact of Pharmaceutical Care Interventions on Health-Related Quality-of-Life Outcomes: A Systematic Review and Meta-analysis. *The Annals of pharmacotherapy.* 2016;50(10):862-81.
151. Nazar H, Nazar Z, Portlock J, Todd A, Slight SP. A systematic review of the role of community pharmacies in improving the transition from secondary to primary care. *Br J Clin Pharmacol.* 2015;80(5):936-48.
152. Obreli-Neto PR, Marques Dos Reis T, Guidoni CM, Girotto E, Guerra ML, de Oliveira Baldoni A, et al. A Systematic Review of the Effects of Continuing Education Programs on Providing Clinical Community Pharmacy Services. *Am J Pharm Educ.* 2016;80(5):88.
153. O'Neal KS, Crosby KM. What is the Role of the Pharmacist in Obesity Management? Current obesity reports. 2014;3(3):298-306.

154. Pande S, Hiller JE, Nkansah N, Bero L. The effect of pharmacist-provided non-dispensing services on patient outcomes, health service utilisation and costs in low- and middle-income countries. *Cochrane Database Syst Rev.* 2013(2):CD010398.
155. Paudyal V, Watson MC, Sach T, Porteous T, Bond CM, Wright DJ, et al. Are pharmacy-based minor ailment schemes a substitute for other service providers? A systematic review. *Br J Gen Pract.* 2013;63(612):e472-81.
156. Renaudin P, Boyer L, Esteve MA, Bertault-Peres P, Auquier P, Honore S. Do pharmacist-led medication reviews in hospitals help reduce hospital readmissions? A systematic review and meta-analysis. *British journal of clinical pharmacology.* 2016.
157. Riordan DO, Walsh KA, Galvin R, Sinnott C, Kearney PM, Byrne S. The effect of pharmacist-led interventions in optimising prescribing in older adults in primary care: A systematic review. *SAGE Open Med.* 2016;4:2050312116652568.
158. Sabater-Hernández D, Sabater-Galindo M, Fernandez-Llimos F, Rotta I, Hossain LN, Durks D, et al. A Systematic Review of Evidence-Based Community Pharmacy Services Aimed at the Prevention of Cardiovascular Disease. *Journal of managed care & specialty pharmacy.* 2016;22(6):699-713.
159. Saberi P, Dong BJ, Johnson MO, Greenblatt RM, Cocohoba JM. The impact of HIV clinical pharmacists on HIV treatment outcomes: a systematic review. *Patient Prefer Adherence.* 2012;6:297-322.
160. Salgado TM, Moles R, Benrimoj SI, Fernandez-Llimos F. Pharmacists' interventions in the management of patients with chronic kidney disease: a systematic review. *Nephrol Dial Transplant.* 2012;27(1):276-92.
161. van Eikenhorst L, Salema NE, Anderson C. A systematic review in select countries of the role of the pharmacist in consultations and sales of non-prescription medicines in community pharmacy. *Research in social & administrative pharmacy : RSAP.* 2017;13(1):17-38.
162. Walsh KA, O'Riordan D, Kearney PM, Timmons S, Byrne S. Improving the appropriateness of prescribing in older patients: a systematic review and meta-analysis of pharmacists' interventions in secondary care. *Age Ageing.* 2016;45(2):201-9.
163. Wang T, Benedict N, Olsen KM, Luan R, Zhu X, Zhou N, et al. Effect of critical care pharmacist's intervention on medication errors: A systematic review and meta-analysis of observational studies. *Journal of critical care.* 2015;30(5):1101-6.
164. Zhou S, Sheng XY, Xiang Q, Wang ZN, Zhou Y, Cui YM. Comparing the effectiveness of pharmacist-managed warfarin anticoagulation with other models: a systematic review and meta-analysis. *J Clin Pharm Ther.* 2016;41(6):602-11.
165. Khangura JK FG, Perera R, Rowe BH, Shepperd S. Primary care professionals providing non-urgent care in hospital emergency departments. *Cochrane Database of Systematic Reviews.* 2012.
166. Kim SL, Tarn DM. Effect of Primary Care Involvement on End-of-Life Care Outcomes: A Systematic Review. *J Am Geriatr Soc.* 2016;64(10):1968-74.
167. Hardy M, Johnson L, Sharples R, Boynes S, Irving D. Does radiography advanced practice improve patient outcomes and health service quality? A systematic review. *The British journal of radiology.* 2016.
168. Baik SH, Gallo LC, Wells KJ. Patient Navigation in Breast Cancer Treatment and Survivorship: A Systematic Review. *Journal of clinical oncology : official journal of the American Society of Clinical Oncology.* 2016;34(30):3686-96.
169. Ahl A, Mikocka-Walus A, Gordon A, Andrews JM. Are self-administered or minimal therapist contact psychotherapies an effective treatment for irritable bowel syndrome (IBS): a systematic review. *Journal of psychosomatic research.* 2013;75(2):113-20.
170. Ahmad Sharoni SK, Minhat HS, Mohd Zulkefli NA, Baharom A. Health education programmes to improve foot self-care practices and foot problems among older people with diabetes: a systematic review. *International journal of older people nursing.* 2016;11(3):214-39.



171. Brady TJ, Murphy L, O'Colmain BJ, Beauchesne D, Daniels B, Greenberg M, et al. A meta-analysis of health status, health behaviors, and healthcare utilization outcomes of the Chronic Disease Self-Management Program. *Prev Chronic Dis*. 2013;10:120112.
172. Heneghan CJ, Garcia-Alamino JM, Spencer EA, Ward AM, Perera R, Bankhead C, et al. Self-monitoring and self-management of oral anticoagulation. *Cochrane Database Syst Rev*. 2016;7:CD003839.
173. Howcroft M, Walters EH, Wood-Baker R, Walters JA. Action plans with brief patient education for exacerbations in chronic obstructive pulmonary disease. *Cochrane Database Syst Rev*. 2016;12:CD005074.
174. Jansons PS, Haines TP, O'Brien L. Interventions to achieve ongoing exercise adherence for adults with chronic health conditions who have completed a supervised exercise program: systematic review and meta-analysis. *Clin Rehabil*. 2017;31(4):465-77.
175. Kopke S, Solari A, Khan F, Heesen C, Giordano A. Information provision for people with multiple sclerosis. *Cochrane Database Syst Rev*. 2014(4):CD008757.
176. Leidy Johanna Rueda DaDLMd, C. The efficacy of telephone use to assist and improve the wellbeing of family caregivers of persons with chronic diseases: a systematic review. *JBI Library of Systematic Reviews*. 2015.
177. Mayo-Wilson E, Montgomery P. Media-delivered cognitive behavioural therapy and behavioural therapy (self-help) for anxiety disorders in adults. *Cochrane Database Syst Rev*. 2013(9):CD005330.
178. McDermott MS, While AE. Maximizing the healthcare environment: A systematic review exploring the potential of computer technology to promote self-management of chronic illness in healthcare settings. *Patient education and counseling*. 2013;92(1):13-22.
179. Millard T, Elliott J, Girdler S. Self-management education programs for people living with HIV/AIDS: a systematic review. *AIDS Patient Care STDS*. 2013;27(2):103-13.
180. Richardson SJ, Brooks HL, Bramley G, Coleman JJ. Evaluating the effectiveness of self-administration of medication (SAM) schemes in the hospital setting: a systematic review of the literature. *PLoS One*. 2014;9(12):e113912.
181. Urquhart C, Currell R, Harlow F, Callow L. Home uterine monitoring for detecting preterm labour. *Cochrane Database Syst Rev*. 2017;2:CD006172.
182. O'Sullivan JW, Harvey RT, Glasziou PP, McCullough A. Written information for patients (or parents of child patients) to reduce the use of antibiotics for acute upper respiratory tract infections in primary care. *Cochrane Database of Systematic Reviews*. 2016.
183. Aubin M, Giguère, A., Martin, M., Verreault, R., Fitch, M. I., Kazanjian, A., Carmichael, P. H. Interventions to improve continuity of care in the follow-up of patients with cancer. *Cochrane Database of Systematic Reviews*. 2012.
184. Balogh R, McMorris CA, Lunsky Y, Ouellette-Kuntz H, Bourne L, Colantonio A, et al. Organising healthcare services for persons with an intellectual disability. *Cochrane Database Syst Rev*. 2016;4:CD007492.
185. Baptista DR, Wiens A, Pontarolo R, Regis L, Reis WC, Correr CJ. The chronic care model for type 2 diabetes: a systematic review. *Diabetology & metabolic syndrome*. 2016;8(1):7.
186. Bhuyan SS, Chandak A, Smith P, Carlton EL, Duncan K, Gentry D. Integration of public health and primary care: A systematic review of the current literature in primary care physician mediated childhood obesity interventions. *Obesity research & clinical practice*. 2015;9(6):539-52.
187. Busetto L, Luijkx KG, Elissen AM, Vrijhoef HJ. Intervention types and outcomes of integrated care for diabetes mellitus type 2: a systematic review. *J Eval Clin Pract*. 2016;22(3):299-310.
188. Desmedt M, Vertriest S, Hellings J, Bergs J, Dessers E, Vankrunkelsven P, et al. Economic Impact of Integrated Care Models for Patients with Chronic Diseases: A Systematic Review. *Value in Health*. 2016;19(6):892-902.



189. Driscoll A, Meagher S, Kennedy R, Hay M, Banerji J, Campbell D, et al. What is the impact of systems of care for heart failure on patients diagnosed with heart failure: a systematic review. *BMC cardiovascular disorders*. 2016.
190. Grant SJ, Frawley J, Bensoussan A. Process of care in outpatient Integrative healthcare facilities: a systematic review of clinical trials. *BMC Health Serv Res*. 2015;15:322.
191. Hopman P, de Bruin SR, Forjaz MJ, Rodriguez-Blazquez C, Tonnara G, Lemmens LC, et al. Effectiveness of comprehensive care programs for patients with multiple chronic conditions or frailty: A systematic literature review. *Health policy (Amsterdam, Netherlands)*. 2016;120(7):818-32.
192. Hwang W, Chang J, Laclair M, Paz H. Effects of integrated delivery system on cost and quality. *Am J Manag Care*. 2013;19(5):e175-84.
193. Stellefson M, Dipnarine K, Stopka C. The chronic care model and diabetes management in US primary care settings: a systematic review. *Prev Chronic Dis*. 2013;10:E26.
194. Takeda A, Taylor SJ, Taylor RS, Khan F, Krum H, Underwood M. Clinical service organisation for heart failure. *Cochrane Database Syst Rev*. 2012(9):CD002752.
195. Tully PJ, Baumeister H. Collaborative care for comorbid depression and coronary heart disease: a systematic review and meta-analysis of randomised controlled trials. *BMJ Open*. 2015;5(12):e009128.
196. Woltmann E, Grogan-Kaylor A, Perron B, Georges H, Kilbourne AM, Bauer MS. Comparative effectiveness of collaborative chronic care models for mental health conditions across primary, specialty, and behavioral health care settings: systematic review and meta-analysis. *Am J Psychiatry*. 2012;169(8):790-804.
197. Yeung CH, Santesso N, Pai M, Kessler C, Key NS, Makris M, et al. Care models in the management of haemophilia: a systematic review. *Haemophilia*. 2016;22 Suppl 3:31-40.
198. Zhou K, Fitzpatrick T, Walsh N, Kim JY, Chou R, Lackey M, et al. Interventions to optimise the care continuum for chronic viral hepatitis: a systematic review and meta-analyses. *The Lancet Infectious diseases*. 2016;16(12):1409-22.
199. Kodjebacheva GD, Sabo T, Xiong J. Interventions to improve child-parent-medical provider communication: A systematic review. *Soc Sci Med*. 2016;166:120-7.
200. Nevis I. Educational Intervention in End-of-Life Care: An Evidence-Based Analysis. *Ont Health Technol Assess Ser*. 2014;14(17):1-30.
201. Zipkin DA, Umscheid CA, Keating NL, Allen E, Aung K, Beyth R, et al. Evidence-Based Risk Communication: A Systematic Review. *Annals of Internal Medicine*. 2014;161(4):270-80.
202. Dwamena F, Holmes-Rovner, M., Gaulden, C. M., Jorgenson, S., Sadigh, G., Sikorskii, A., Lewin, S., Smith, R. C., Coffey, J., Olomu, A. Interventions for providers to promote a patient-centred approach in clinical consultations. *Cochrane Database of Systematic Reviews*. 2012.
203. Legare F, Stacey D, Turcotte S, Cossi MJ, Kryworuchko J, Graham ID, et al. Interventions for improving the adoption of shared decision making by healthcare professionals. *Cochrane Database Syst Rev*. 2014(9):CD006732.
204. Coxeter P, Del Mar, C. B., McGregor, L., Beller, E. M. and Hoffmann, T. C. Interventions to facilitate shared decision making to address antibiotic use for acute respiratory infections in primary care. *Cochrane Database of Systematic Reviews*. 2015.
205. Feldman-Stewart D, O'Brien, M. A., Clayman, M. L., Davison, B. J., Jimbo, M., Labrecque, M., Martin, R. W. and Shepherd, H. Providing information about options in patient decision aids. *BMC medical informatics and decision making*. 2013.
206. Horey D, Kealy, M., Davey, M., Small, R., Crowther, C. A. Interventions for supporting pregnant women's decision-making about mode of birth after a caesarean. *Cochrane Database of Systematic Reviews*. 2013.
207. Kashaf MSaM, E. Does Shared Decision Making in Cancer Treatment Improve Quality of Life? A Systematic Literature Review. *Medical decision making : an international journal of the Society for Medical Decision Making*. 2015.

208. Nilsson C, Lundgren I, Smith V, Vehvilainen-Julkunen K, Nicoletti J, Devane D, et al. Women-centred interventions to increase vaginal birth after caesarean section (VBAC): A systematic review. *Midwifery*. 2015;31(7):657-63.
209. Peterson EB, Ostroff JS, DuHamel KN, D'Agostino TA, Hernandez M, Canzona MR, et al. Impact of provider-patient communication on cancer screening adherence: A systematic review. *Preventive medicine*. 2016;93:96-105.
210. Stacey D, Legare F, Lewis K, Barry MJ, Bennett CL, Eden KB, et al. Decision aids for people facing health treatment or screening decisions. *Cochrane Database Syst Rev*. 2017;4:CD001431.
211. van Weert JC, van Munster BC, Sanders R, Spijker R, Hooft L, Jansen J. Decision aids to help older people make health decisions: a systematic review and meta-analysis. *BMC Med Inform Decis Mak*. 2016;16:45.
212. Volk RJ, Linder SK, Lopez-Olivo MA, Kamath GR, Reuland DS, Saraykar SS, et al. Patient Decision Aids for Colorectal Cancer Screening: A Systematic Review and Meta-analysis. *American journal of preventive medicine*. 2016;51(5):779-91.
213. Smith TO, Hameed YA, Cross JL, Henderson C, Sahota O, Fox C. Enhanced rehabilitation and care models for adults with dementia following hip fracture surgery. *Cochrane Database Syst Rev*. 2015(6):CD010569.
214. Houben CH, Spruit MA, Groenen MT, Wouters EF, Janssen DJ. Efficacy of Advance Care Planning: A Systematic Review and Meta-Analysis. *Journal of the American Medical Directors Association*. 2014;15(7):477-89.
215. Lim CE, Ng RW, Cheng NC, Cigolini M, Kwok C, Brennan F. Advance care planning for haemodialysis patients. *Cochrane Database Syst Rev*. 2016;7:CD010737.
216. Sumalinog R, Harrington K, Dosani N, Hwang SW. Advance care planning, palliative care, and end-of-life care interventions for homeless people: A systematic review. *Palliative medicine*. 2017;31(2):109-19.
217. Weathers E, O'Caoimh R, Cornally N, Fitzgerald C, Kearns T, Coffey A, et al. Advance care planning: A systematic review of randomised controlled trials conducted with older adults. *Maturitas*. 2016;91:101-9.
218. Bleich SN, Sherrod C, Chiang A, Boyd C, Wolff J, DuGoff E, et al. Systematic Review of Programs Treating High-Need and High-Cost People With Multiple Chronic Diseases or Disabilities in the United States, 2008-2014. *Prev Chronic Dis*. 2015;12:E197.
219. Dieterich M, Irving CB, Bergman H, Khokhar MA, Park B, Marshall M. Intensive case management for severe mental illness. *Cochrane Database Syst Rev*. 2017;1:CD007906.
220. Gillies D, Buykx P, Parker AG, Hetrick SE. Consultation liaison in primary care for people with mental disorders. *Cochrane Database Syst Rev*. 2015(9):CD007193.
221. Hickam DH, Weiss JW, Guise JM, Buckley D, Motu'apuaka M, Graham E, et al. Outpatient Case Management for Adults With Medical Illness and Complex Care Needs. *Outpatient Case Management for Adults With Medical Illness and Complex Care Needs*. AHRQ Comparative Effectiveness Reviews. Rockville (MD)2013.
222. Huntley AL, Johnson R, King A, Morris RW, Purdy S. Does case management for patients with heart failure based in the community reduce unplanned hospital admissions? A systematic review and meta-analysis. *BMJ open*. 2016.
223. Joo JY, Liu MF. Case management effectiveness in reducing hospital use: a systematic review. *International nursing review*. 2016.
224. Khanassov V, Vedel I. Family Physician-Case Manager Collaboration and Needs of Patients With Dementia and Their Caregivers: A Systematic Mixed Studies Review. *Annals of family medicine*. 2016.
225. Reilly S, Miranda-Castillo C, Malouf R, Hoe J, Toot S, Challis D, et al. Case management approaches to home support for people with dementia. *Cochrane Database Syst Rev*. 2015;1:CD008345.

226. Somme D, Trouve H, Drame M, Gagnon D, Couturier Y, Saint-Jean O. Analysis of case management programs for patients with dementia: a systematic review. *Alzheimers Dement*. 2012;8(5):426-36.
227. You EC, Dunt D, Doyle C, Hsueh A. Effects of case management in community aged care on client and carer outcomes: a systematic review of randomized trials and comparative observational studies. *BMC Health Serv Res*. 2012;12:395.
228. Tibingana-Ahimbisibwe B, Katabira C, Mpalampa L, Harrison RA. The effectiveness of adolescent-specific prenatal interventions on improving attendance and reducing harm during and after birth: a systematic review. *International journal of adolescent medicine and health*. 2016.
229. Fernandez Turienzo C, Sandall J, Peacock JL. Models of antenatal care to reduce and prevent preterm birth: a systematic review and meta-analysis. *BMJ Open*. 2016;6(1):e009044.
230. Ibrahim N, Michail, M. and Callaghan, P. The strengths based approach as a service delivery model for severe mental illness: A meta-analysis of clinical trials. *BMC Psychiatry*. 2014.
231. Jutkowitz E, Brasure M, Fuchs E, Shippee T, Kane RA, Fink HA, et al. Care-Delivery Interventions to Manage Agitation and Aggression in Dementia Nursing Home and Assisted Living Residents: A Systematic Review and Meta-analysis. *J Am Geriatr Soc*. 2016;64(3):477-88.
232. Kimmel AD, Martin EG, Galadima H, Bono RS, Tehrani AB, Cyrus JW, et al. Clinical outcomes of HIV care delivery models in the US: a systematic review. *AIDS care*. 2016;28(10):1-12.
233. Laver K, Milte R, Dyer S, Crotty M. A Systematic Review and Meta-Analysis Comparing Carer Focused and Dyadic Multicomponent Interventions for Carers of People With Dementia. *Journal of aging and health*. 2016.
234. Robertson J, Baines S, Emerson E, Hatton C. Service Responses to People with Intellectual Disabilities and Epilepsy: A Systematic Review. *J Appl Res Intellect Disabil*. 2017;30(1):1-32.
235. Fleeman N, Bradley PM, Lindsay B. Care delivery and self management strategies for children with epilepsy. *Cochrane Database Syst Rev*. 2015(12):CD006245.
236. Peytremann-Bridevaux I, Arditi C, Gex G, Bridevaux PO, Burnand B. Chronic disease management programmes for adults with asthma. *Cochrane Database Syst Rev*. 2015(5):CD007988.
237. Bird M, Anderson K, MacPherson S, Blair A. Do interventions with staff in long-term residential facilities improve quality of care or quality of life people with dementia? A systematic review of the evidence. *International psychogeriatrics*. 2016;28(12):1937-63.
238. Connell CJ, Endacott R, Jackman JA, Kiprillis NR, Sparkes LM, Cooper SJ. The effectiveness of education in the recognition and management of deteriorating patients: A systematic review. *Nurse education today*. 2016;44:133-45.
239. Moore PM, Rivera Mercado S, Grez Artigues M, Lawrie TA. Communication skills training for healthcare professionals working with people who have cancer. *Cochrane Database Syst Rev*. 2013(3):CD003751.
240. Oliveira VC, Ferreira ML, Pinto RZ, Filho RF, Refshauge K, Ferreira PH. Effectiveness of Training Clinicians' Communication Skills on Patients' Clinical Outcomes: A Systematic Review. *J Manipulative Physiol Ther*. 2015;38(8):601-16.
241. Paneque M, Turchetti D, Jackson L, Lunt P, Houwink E, Skirton H. A systematic review of interventions to provide genetics education for primary care. *BMC family practice*. 2016;17:89.
242. Petriwskyj A, Parker, D., Brown Wilson, C. and Gibson, A. What Health and Aged Care Culture Change Models Mean for Residents and Their Families: A Systematic Review. *The Gerontologist*. 2015.
243. Seidu S, Walker NS, Bodicoat DH, Davies MJ, Khunti K. A systematic review of interventions targeting primary care or community based professionals on cardio-metabolic risk factor control in people with diabetes. *Diabetes Res Clin Pract*. 2016;113:1-13.
244. Chan RJ, Webster J, Bowers A. End-of-life care pathways for improving outcomes in caring for the dying. *Cochrane Database Syst Rev*. 2016;2:CD008006.
245. McCallum GB, Bailey EJ, Morris PS, Chang AB. Clinical pathways for chronic cough in children. *Cochrane Database Syst Rev*. 2014(9):CD006595.

246. Gordon SA, Reiter ER. Effectiveness of critical care pathways for head and neck cancer surgery: A systematic review. *Head & neck*. 2016;38(9):1421-7.
247. Niven DJ, Bastos JF, Stelfox HT. Critical Care Transition Programs and the Risk of Readmission or Death After Discharge From an ICU: A Systematic Review and Meta-Analysis. *Critical care medicine*. 2013;42(1):179-87.
248. Ambia J, Mandala J. A systematic review of interventions to improve prevention of mother-to-child HIV transmission service delivery and promote retention. *J Int AIDS Soc*. 2016;19(1):20309.
249. Brennan A, Browne JP, Horgan M. A systematic review of health service interventions to improve linkage with or retention in HIV care. *AIDS Care*. 2014;26(7):804-12.
250. Geldsetzer P, Yapa HM, Vaikath M, Ogbuaji O, Fox MP, Essajee SM, et al. A systematic review of interventions to improve postpartum retention of women in PMTCT and ART care. *J Int AIDS Soc*. 2016;19(1):20679.
251. Maharaj R, Raffaele I, Wendon J. Rapid response systems: a systematic review and meta-analysis. *Critical care (London, England)*. 2015;19:254.
252. Fox MT, Persaud, M., Maimets, I., O'Brien, K., Brooks, D., Tregunno, D. and Schraa, E. Effectiveness of Acute Geriatric Unit Care Using Acute Care for Elders Components: A Systematic Review and Meta-Analysis. *Journal of the American Geriatrics Society*. 2012.
253. Atlantis E, Fahey P, Foster J. Collaborative care for comorbid depression and diabetes: a systematic review and meta-analysis. *BMJ Open*. 2014;4(4):e004706.
254. Cochrane A, Higgins NM, FitzGerald O, Gallagher P, Ashton J, Corcoran O, et al. Early interventions to promote work participation in people with regional musculoskeletal pain: a systematic review and meta-analysis. *Clin Rehabil*. 2017;31(11):1466-81.
255. Archer J, Bower, P., Gilbody, S., Lovell, K., Richards, D., Gask, L. Collaborative care for depression and anxiety problems. *Cochrane Database of Systematic Reviews*. 2012.
256. Bearne LM, Byrne AM, Segrave H, White CM. Multidisciplinary team care for people with rheumatoid arthritis: a systematic review and meta-analysis. *Rheumatol Int*. 2016;36(3):311-24.
257. Buecking B, Timmesfeld N, Riem S, Bliemel C, Hartwig E, Friess T, et al. Early orthogeriatric treatment of trauma in the elderly: a systematic review and metaanalysis. *Dtsch Arztebl Int*. 2013;110(15):255-62.
258. Deschodt M, Flamaing J, Haentjens P, Boonen S, Milisen K. Impact of geriatric consultation teams on clinical outcome in acute hospitals: a systematic review and meta-analysis. *BMC Med*. 2013;11:48.
259. Helou N, Dwyer A, Shaha M, Zanchi A. Multidisciplinary management of diabetic kidney disease: a systematic review and meta-analysis. *JBIM database of systematic reviews and implementation reports*. 2016;14(7):169-207.
260. Hickman LD, Phillips JL, Newton PJ, Halcomb EJ, Al Abed N, Davidson PM. Multidisciplinary team interventions to optimise health outcomes for older people in acute care settings: A systematic review. *Archives of gerontology and geriatrics*. 2015;61(3):322-9.
261. Hubbeling D, Bertram R. Crisis resolution teams in the UK and elsewhere. *J Ment Health*. 2012;21(3):285-95.
262. Kamper SJ, Apeldoorn AT, Chiarotto A, Smeets RJE, Ostelo RWJG, Guzman J, et al. Multidisciplinary biopsychosocial rehabilitation for chronic low back pain: Cochrane systematic review and meta-analysis. *BMJ : British Medical Journal*. 2015;350:h444.
263. Korner M, Butof S, Muller C, Zimmermann L, Becker S, Bengel J. Interprofessional teamwork and team interventions in chronic care: A systematic review. *J Interprof Care*. 2016;30(1):15-28.
264. Leclerc BS, Blanchard L, Cantinotti M, Couturier Y, Gervais D, Lessard S, et al. The effectiveness of interdisciplinary teams in end-of-life palliative care: a systematic review of comparative studies. *Journal of palliative care*. 2014;30(1):44-54.
265. Lee JK, Slack MK, Martin J, Ehrman C, Chisholm-Burns M. Geriatric patient care by U.S. pharmacists in healthcare teams: systematic review and meta-analyses. *J Am Geriatr Soc*. 2013;61(7):1119-27.

266. Mercedes A, Fairman P, Hogan L, Thomas R, Slyer JT. Effectiveness of structured multidisciplinary rounding in acute care units on length of stay and satisfaction of patients and staff: a quantitative systematic review. *JBI database of systematic reviews and implementation reports*. 2016;14(7):131-68.
267. Pillay B, Wootten AC, Crowe H, Corcoran N, Tran B, Bowden P, et al. The impact of multidisciplinary team meetings on patient assessment, management and outcomes in oncology settings: A systematic review of the literature. *Cancer treatment reviews*. 2015;42:56-72.
268. Reilly S, Planner C, Gask L, Hann M, Knowles S, Druss B, et al. Collaborative care approaches for people with severe mental illness. *Cochrane Database Syst Rev*. 2013(11):CD009531.
269. Schepman S, Hansen J, de Putter ID, Batenburg RS, de Bakker DH. The common characteristics and outcomes of multidisciplinary collaboration in primary health care: a systematic literature review. *Int J Integr Care*. 2015;15:e027.
270. Sharp WG, Volkert VM, Scahill L, McCracken CE, McElhanon B. A Systematic Review and Meta-Analysis of Intensive Multidisciplinary Intervention for Pediatric Feeding Disorders: How Standard Is the Standard of Care? *The Journal of pediatrics*. 2017;181:116-24.e4.
271. Wang SM, Hsiao LC, Ting IW, Yu TM, Liang CC, Kuo HL, et al. Multidisciplinary care in patients with chronic kidney disease: A systematic review and meta-analysis. *European journal of internal medicine*. 2015;26(8):640-5.
272. Yang GM, Neo SH, Lim SZ, Krishna LK. Effectiveness of Hospital Palliative Care Teams for Cancer Inpatients: A Systematic Review. *Journal of palliative medicine*. 2016;19(11):1156-65.
273. Chang AS, Berry A, Jones LJ, Sivasangari S. Specialist teams for neonatal transport to neonatal intensive care units for prevention of morbidity and mortality. *Cochrane Database Syst Rev*. 2015(10):CD007485.
274. Goyder C, Atherton, H., Car, M., Heneghan, C. J. and Car, J. Email for clinical communication between healthcare professionals. *Cochrane Database of Systematic Reviews*. 2015.
275. Villa-Roel C, Nickel, T., Ospina, M., Voaklander, B., Campbell, S. and Rowe, B. H. Effectiveness of Educational Interventions to Increase Primary Care Follow-up for Adults Seen in the Emergency Department for Acute Asthma: A Systematic Review and Meta-analysis. *Academic emergency medicine : official journal of the Society for Academic Emergency Medicine*. 2015.
276. Walsh C, Siegler, E. L., Cheston, E., O'Donnell, H., Collins, S., Stein, D., Vawdrey, D. K., Stetson, P. D. and Informatics Intervention Research, C. Provider-to-provider electronic communication in the era of meaningful use: a review of the evidence. *Journal of hospital medicine : an official publication of the Society of Hospital Medicine*. 2013.
277. Wu RC, Tran, K., Lo, V., O'Leary, K. J., Morra, D., Quan, S. D. and Perrier, L. Effects of clinical communication interventions in hospitals: a systematic review of information and communication technology adoptions for improved communication between clinicians. *International journal of medical informatics*. 2012.
278. Hesselink G, Schoonhoven L, Barach P, Spijker A, Gademan P, Kalkman C, et al. Improving patient handovers from hospital to primary care: a systematic review. *Ann Intern Med*. 2012;157(6):417-28.
279. Luu NP, Pitts S, Petty B, Sawyer MD, Dennison-Himmelfarb C, Boonyasai RT, et al. Provider-to-Provider Communication during Transitions of Care from Outpatient to Acute Care: A Systematic Review. *J Gen Intern Med*. 2016;31(4):417-25.
280. Abraham J, Kannampallil T, Caskey RN, Kitsiou S. Emergency Department-Based Care Transitions for Pediatric Patients: A Systematic Review. *Pediatrics*. 2016;138(2):1-15.
281. Betz CL, O'Kane LS, Nehring WM, Lobo ML. Systematic review: Health care transition practice service models. *Nursing outlook*. 2016;64(3):229-43.
282. Bhawra J, Toulany A, Cohen E, Moore Hepburn C, Guttmann A. Primary care interventions to improve transition of youth with chronic health conditions from paediatric to adult healthcare: a systematic review. *BMJ Open*. 2016;6(5):e011871.



283. Clemente D, Leon L, Foster H, Minden K, Carmona L. Systematic review and critical appraisal of transitional care programmes in rheumatology. *Seminars in arthritis and rheumatism*. 2016;46(3):372-9.
284. Embrett MG, Randall, G. E., Longo, C. J., Nguyen, T. and Mulvale, G. Effectiveness of Health System Services and Programs for Youth to Adult Transitions in Mental Health Care: A Systematic Review of Academic Literature. *Administration and policy in mental health*. 2015.
285. Findley MK, Cha E, Wong E, Faulkner MS. A Systematic Review of Transitional Care for Emerging Adults with Diabetes. *J Pediatr Nurs*. 2015;30(5):e47-62.
286. Kim H, Thyer BA. Does transitional care prevent older adults from rehospitalization? A review. *Journal of evidence-informed social work*. 2015;12(3):261-71.
287. Allen J, Hutchinson AM, Brown R, Livingston PM. Quality care outcomes following transitional care interventions for older people from hospital to home: a systematic review. *BMC Health Serv Res*. 2014;14:346.
288. Braet A, Weltens C, Sermeus W. Effectiveness of discharge interventions from hospital to home on hospital readmissions: a systematic review. *JBIM database of systematic reviews and implementation reports*. 2016;14(2):106-73.
289. Branowicki PM, Vessey JA, Graham DA, McCabe MA, Clapp AL, Blaine K, et al. Meta-Analysis of Clinical Trials That Evaluate the Effectiveness of Hospital-Initiated Postdischarge Interventions on Hospital Readmission. *Journal for healthcare quality : official publication of the National Association for Healthcare Quality*. 2016.
290. Echevarria C, Brewin K, Horobin H, Bryant A, Corbett S, Steer J, et al. Early Supported Discharge/ Hospital At Home For Acute Exacerbation Of Chronic Obstructive Pulmonary Disease: A Review and Meta-Analysis. *COPD*. 2016;13(4):1-11.
291. Fearon P, Langhorne P. Services for reducing duration of hospital care for acute stroke patients. *Cochrane Database Syst Rev*. 2012(9):Cd000443.
292. Fox MT, Persaud M, Maimets I, Brooks D, O'Brien K, Tregunno D. Effectiveness of early discharge planning in acutely ill or injured hospitalized older adults: a systematic review and meta-analysis. *BMC Geriatr*. 2013;13:70.
293. Gonçalves-Bradley DC, Lannin NA, Clemson LM, Cameron ID, Shepperd S. Discharge planning from hospital. *The Cochrane Library*. 2016.
294. Guerin M, Grimmer, K. and Kumar, S. Community services' involvement in the discharge of older adults from hospital into the community. *International journal of integrated care*. 2013.
295. Loeffen EAH, te Poele EM, Tissing WJE, Boezen HM, de Bont ESJM. Very early discharge versus early discharge versus non-early discharge in children with cancer and febrile neutropenia. *Cochrane Database of Systematic Reviews*. 2016.
296. Meyer MJ, Teasell R, Thind A, Koval J, Speechley M. A Synthesis of Peer-Reviewed Literature on Team-Coordinated and Delivered Early Supported Discharge After Stroke. *Can J Neurol Sci*. 2016;43(3):353-9.
297. Ospina MB, Mrklas K, Deuchar L, Rowe BH, Leigh R, Bhutani M, et al. A systematic review of the effectiveness of discharge care bundles for patients with COPD. *Thorax*. 2017;72(1):31-9.
298. Goncalves-Bradley DC, Iliffe S, Doll HA, Broad J, Gladman J, Langhorne P, et al. Early discharge hospital at home. *Cochrane Database Syst Rev*. 2017;6:Cd000356.
299. Lei Q, Wang X, Tan S, Xia X, Zheng H, Wu C. Fast-track programs versus traditional care in hepatectomy: a meta-analysis of randomized controlled trials. *Digestive surgery*. 2014;31(4-5):392-9.
300. Song W, Wang K, Zhang RJ, Dai QX, Zou SB. The enhanced recovery after surgery (ERAS) program in liver surgery: a meta-analysis of randomized controlled trials. *Springerplus*. 2016;5:207.
301. Wu SJ, Xiong XZ, Lu J, Cheng Y, Lin YX, Zhou RX, et al. Fast-Track Programs for Liver Surgery: A Meta-Analysis. *J Gastrointest Surg*. 2015;19(9):1640-52.
302. Zarea Gavgani V, Kazemi Majd F, Nosratnejad S, Golmohammadi A, Sadeghi-Bazargani H. The Efficacy of Written Information Intervention in Reduction of Hospital Re-admission Cost in Patients With Heart Failure; A Systematic Review and Meta-Analysis. *J Cardiovasc Thorac Res*. 2015;7(1):1-5.

303. Jones CE, Hollis RH, Wahl TS, Oriel BS, Itani KM, Morris MS, et al. Transitional care interventions and hospital readmissions in surgical populations: a systematic review. *American journal of surgery*. 2016;212(2):327-35.
304. Roper KL, Ballard J, Rankin W, Cardarelli R. Systematic Review of Ambulatory Transitional Care Management (TCM) Visits on Hospital 30-Day Readmission Rates. *American journal of medical quality : the official journal of the American College of Medical Quality*. 2015;32(1):19-26.
305. Brown HC, Smith, H. J., Mori, R. and Noma, H. Giving women their own case notes to carry during pregnancy. *Cochrane Database of Systematic Reviews*. 2015.
306. Hawley G, Janamian, T., Jackson, C. and Wilkinson, S. A. In a maternity shared-care environment, what do we know about the paper hand-held and electronic health record: a systematic literature review. *BMC pregnancy and childbirth*. 2014.
307. Boksmati N, Butler-Henderson K, Anderson K, Sahama T. The Effectiveness of SMS Reminders on Appointment Attendance: a Meta-Analysis. *J Med Syst*. 2016;40(4):90.
308. Guy R, Hocking, J., Wand, H., Stott, S., Ali, H. and Kaldor, J. How effective are short message service reminders at increasing clinic attendance? A meta-analysis and systematic review. *Health services research*. 2012.
309. McLean S, Gee M, Booth A, Salway S, Nancarrow S, Cobb M, et al. Targeting the Use of Reminders and Notifications for Uptake by Populations (TURNUP): a systematic review and evidence synthesis. *Health Services and delivery research*. 2014;34:1-184.
310. Harvey H, Reissland N, Mason J. Parental reminder, recall and educational interventions to improve early childhood immunisation uptake: A systematic review and meta-analysis. *Vaccine*. 2015;33(25):2862-80.
311. Chapman SM, Wray J, Oulton K, Peters MJ. Systematic review of paediatric track and trigger systems for hospitalised children. *Resuscitation*. 2016;109:87-109.
312. Robinson JR, Huth H, Jackson GP. Review of information technology for surgical patient care. *J Surg Res*. 2016;203(1):121-39.
313. Liu Q, Abba K, Alejandria MM, Sinclair D, Balanag VM, Lansang MA. Reminder systems to improve patient adherence to tuberculosis clinic appointments for diagnosis and treatment. *Cochrane Database Syst Rev*. 2014(11):Cd006594.
314. Middleton P, Crowther CA. Reminder systems for women with previous gestational diabetes mellitus to increase uptake of testing for type 2 diabetes or impaired glucose tolerance. *Cochrane Database Syst Rev*. 2014(3):CD009578.
315. Riley P, Worthington HV, Clarkson JE, Beirne PV. Recall intervals for oral health in primary care patients. *Cochrane Database Syst Rev*. 2013(12):CD004346.
316. Fenerty SD, West C, Davis SA, Kaplan SG, Feldman SR. The effect of reminder systems on patients' adherence to treatment. *Patient Prefer Adherence*. 2012;6:127-35.
317. Shultz CGaH, H. L. The Use of Medical Scribes in Health Care Settings: A Systematic Review and Future Directions. *Journal of the American Board of Family Medicine : JABFM*. 2015.
318. North JC, Jordan KC, Metos J, Hurdle JF. Nutrition Informatics Applications in Clinical Practice: a Systematic Review. *AMIA Annu Symp Proc*. 2015;2015:963-72.
319. Paterson M, Kinnear M, Bond C, McKinstry B. A systematic review of electronic multi-compartment medication devices with reminder systems for improving adherence to self-administered medications. *The International journal of pharmacy practice*. 2017;25(3):185-94.
320. Sinnemaki J, Sihvo S, Isojarvi J, Blom M, Airaksinen M, Mantyla A. Automated dose dispensing service for primary healthcare patients: a systematic review. *Syst Rev*. 2013;2:1.
321. Watson SJ, Aldus CF, Bond C, Bhattacharya D. Systematic review of the health and societal effects of medication organisation devices. *BMC health services research*. 2016;16(1):202.
322. Mekonnen AB, Abebe TB, McLachlan AJ, Brien JA. Impact of electronic medication reconciliation interventions on medication discrepancies at hospital transitions: a systematic review and meta-analysis. *BMC medical informatics and decision making*. 2016.



323. Ciciriello S, Johnston R.V., Osborne, R. H., Wicks, I., deKroo, T., Clerehan, R., O'Neill, C., Buchbinder, R. Multimedia educational interventions for consumers about prescribed and over-the-counter medications. *Cochrane Database of Systematic Reviews*. 2013.
324. Irizarry T, DeVito Dabbs A, Curran CR. Patient Portals and Patient Engagement: A State of the Science Review. *J Med Internet Res*. 2015;17(6):e148.
325. Kruse CS, Bolton K, Freriks G. The Effect of Patient Portals on Quality Outcomes and Its Implications to Meaningful Use: A Systematic Review. *Journal of medical Internet research*. 2015;17(2):e44.
326. Vest JR, Jung HY, Ostrovsky A, Das LT, McGinty GB. Image Sharing Technologies and Reduction of Imaging Utilization: A Systematic Review and Meta-analysis. *J Am Coll Radiol*. 2015;12(12 Pt B):1371-9 e3.
327. Baysari MT, Lehnbohm EC, Li L, Hargreaves A, Day RO, Westbrook JI. The effectiveness of information technology to improve antimicrobial prescribing in hospitals: A systematic review and meta-analysis. *International journal of medical informatics*. 2016;92:15-34.
328. Charlier N, Zupancic N, Fieuws S, Denhaerynck K, Zaman B, Moons P. Serious games for improving knowledge and self-management in young people with chronic conditions: a systematic review and meta-analysis. *J Am Med Inform Assoc*. 2016;23(1):230-9.
329. Fleming TM, Cheek C, Merry SN, Thabrew H, Bridgman H, Stasiak K, et al. Serious games for the treatment or prevention of depression: A systematic review. *Revista de Psicopatología y Psicología Clínica*. 2014;19(3).
330. Finkelstein J, Knight, A., Marinopoulos, S., Gibbons, M. C., Berger, Z., Aboumatar, H., Wilson, R. F., Lau, B. D., Sharma, R. and Bass, E. B. Enabling patient-centered care through health information technology. *Evidence report/technology assessment*. 2012.
331. Liu L, Stroulia E, Nikolaidis I, Miguel-Cruz A, Rios Rincon A. Smart homes and home health monitoring technologies for older adults: A systematic review. *Int J Med Inform*. 2016;91:44-59.
332. Brzan PP, Rotman E, Pajnkihar M, Klanjsek P. Mobile Applications for Control and Self Management of Diabetes: A Systematic Review. *J Med Syst*. 2016;40(9):210.
333. Burns K, Keating P, Free C. A systematic review of randomised control trials of sexual health interventions delivered by mobile technologies. *BMC Public Health*. 2016;16(1):778.
334. Connelly J, Kirk, A., Masthoff, J. and Macrury, S. The use of technology to promote physical activity in Type 2 diabetes management: a systematic review. *Diabetic medicine : a journal of the British Diabetic Association*. 2013.
335. Cui M, Wu X, Mao J, Wang X, Nie M. T2DM Self-Management via Smartphone Applications: A Systematic Review and Meta-Analysis. *PLoS One*. 2016;11(11):e0166718.
336. de Ridder M, Kim J, Jing Y, Khadra M, Nanan R. A systematic review on incentive-driven mobile health technology: As used in diabetes management. *J Telemed Telecare*. 2017;23(1):26-35.
337. El-Gayar O, Timsina P, Nawar N, Eid W. A systematic review of IT for diabetes self-management: are we there yet? *International journal of medical informatics*. 2013;82(8):637-52.
338. Finch L, Janda M, Loescher LJ, Hacker E. Can skin cancer prevention be improved through mobile technology interventions? A systematic review. *Prev Med*. 2016;90:121-32.
339. Flores Mateo G, Granado-Font E, Ferré-Grau C, Montaña-Carreras X. Mobile Phone Apps to Promote Weight Loss and Increase Physical Activity: A Systematic Review and Meta-Analysis. *Journal of medical Internet research*. 2015;17(11):e253.
340. Fowler LA, Holt SL, Joshi D. Mobile technology-based interventions for adult users of alcohol: A systematic review of the literature. *Addictive behaviors*. 2016;62:25-34.
341. Hui CY, Walton R, McKinstry B, Jackson T, Parker R, Pinnock H. The use of mobile applications to support self-management for people with asthma: a systematic review of controlled studies to identify features associated with clinical effectiveness and adherence. *Journal of the American Medical Informatics Association : JAMIA*. 2016;24(3):619-32.
342. Lee J, Piao M, Byun A, Kim J. A Systematic Review and Meta-Analysis of Intervention for Pediatric Obesity Using Mobile Technology. *Stud Health Technol Inform*. 2016;225:491-4.

343. L'Engle KL, Mangone ER, Parcesepe AM, Agarwal S, Ippoliti NB. Mobile Phone Interventions for Adolescent Sexual and Reproductive Health: A Systematic Review. *Pediatrics*. 2016;138(3):1-16.
344. McMillan KA, Kirk A, Hewitt A, MacRury S. A Systematic and Integrated Review of Mobile-Based Technology to Promote Active Lifestyles in People With Type 2 Diabetes. *J Diabetes Sci Technol*. 2017;11(2):299-307.
345. Nour M, Chen J, Allman-Farinelli M. Efficacy and External Validity of Electronic and Mobile Phone-Based Interventions Promoting Vegetable Intake in Young Adults: Systematic Review and Meta-Analysis. *J Med Internet Res*. 2016;18(4):e58.
346. Park C, Kim G, Patel I, Chang J, Tan X. Improving adherence to acne treatment: the emerging role of application software. *Clin Cosmet Investig Dermatol*. 2014;7:65-72.
347. Park LG, Beatty A, Stafford Z, Whooley MA. Mobile Phone Interventions for the Secondary Prevention of Cardiovascular Disease. *Prog Cardiovasc Dis*. 2016;58(6):639-50.
348. Smith C, Gold, J., Ngo, T. D., Sumpter, C. and Free, C. Mobile phone-based interventions for improving contraception use. *Cochrane Database of Systematic Reviews*. 2015.
349. Stephens J, Allen J. Mobile phone interventions to increase physical activity and reduce weight: a systematic review. *J Cardiovasc Nurs*. 2013;28(4):320-9.
350. Whittaker R, McRobbie H, Bullen C, Rodgers A, Gu Y. Mobile phone-based interventions for smoking cessation. *Cochrane Database Syst Rev*. 2016;4:CD006611.
351. Zhao J, Freeman B, Li M. Can Mobile Phone Apps Influence People's Health Behavior Change? An Evidence Review. *J Med Internet Res*. 2016;18(11):e287.
352. Whitehead L, Seaton P. The Effectiveness of Self-Management Mobile Phone and Tablet Apps in Long-term Condition Management: A Systematic Review. *Journal of medical Internet research*. 2016;18(5):e97.
353. Ganguli A, Clewell J, Shillington AC. The impact of patient support programs on adherence, clinical, humanistic, and economic patient outcomes: a targeted systematic review. *Patient Prefer Adherence*. 2016;10:711-25.
354. Maher CA, Lewis LK, Ferrar K, Marshall S, De Bourdeaudhuij I, Vandelanotte C. Are health behavior change interventions that use online social networks effective? A systematic review. *Journal of medical Internet research*. 2014;16(2):e40.
355. Smailhodzic E, Hooijsma W, Boonstra A, Langley DJ. Social media use in healthcare: A systematic review of effects on patients and on their relationship with healthcare professionals. *BMC Health Serv Res*. 2016;16:442.
356. Välimäki M, Athanasopoulou C, Lahti M, Adams CE. Effectiveness of Social Media Interventions for People With Schizophrenia: A Systematic Review and Meta-Analysis. *Journal of medical Internet research*. 2016;18(4):e92.
357. Dennis SM, Harris, M., Lloyd, J., Powell Davies, G., Faruqi, N. and Zwar, N. Do people with existing chronic conditions benefit from telephone coaching? A rapid review. *Australian health review* : a publication of the Australian Hospital Association. 2013.
358. Sawesi S, Rashrash M, Phalakornkule K, Carpenter JS, Jones JF. The Impact of Information Technology on Patient Engagement and Health Behavior Change: A Systematic Review of the Literature. *JMIR medical informatics*. 2016;4(1):e1.
359. O'Rourke L, Humphris G, Baldacchino A. Electronic communication based interventions for hazardous young drinkers: A systematic review. *Neuroscience and biobehavioral reviews*. 2016;68:880-90.
360. Arambepola C, Ricci-Cabello I, Manikavasagam P, Roberts N, French DP, Farmer A. The Impact of Automated Brief Messages Promoting Lifestyle Changes Delivered Via Mobile Devices to People with Type 2 Diabetes: A Systematic Literature Review and Meta-Analysis of Controlled Trials. *Journal of medical Internet research*. 2016;18(4):e86.
361. Badawy SM, Kuhns LM. Economic Evaluation of Text-Messaging and Smartphone-Based Interventions to Improve Medication Adherence in Adolescents with Chronic Health Conditions: A Systematic Review. *JMIR mHealth and uHealth*. 2016;4(4):e121.

362. Posadzki P, Mastellos N, Ryan R, Gunn LH, Felix LM, Pappas Y, et al. Automated telephone communication systems for preventive healthcare and management of long-term conditions. *Cochrane Database Syst Rev.* 2016;12:CD009921.
363. Nieuwboer CC, Fukkink RG, Hermanns JM. Peer and professional parenting support on the Internet: a systematic review. *Cyberpsychol Behav Soc Netw.* 2013;16(7):518-28.
364. Gentry S, Hmmt van-Velthoven, M., Car, L. T., Car, J. Telephone delivered interventions for reducing morbidity and mortality in people with HIV infection. *Cochrane Database of Systematic Reviews.* 2013.
365. Hvidt EA, Ploug, T. and Holm, S. The impact of telephone crisis services on suicidal users: a systematic review of the past 45 years. *Mental Health Review Journal.* 2016;21(2):141-60.
366. Inglis SC, Clark RA, Dierckx R, Prieto-Merino D, Cleland JG. Structured telephone support or non-invasive telemonitoring for patients with heart failure. *Cochrane Database Syst Rev.* 2015(10):CD007228.
367. Jayakody A, Bryant J, Carey M, Hobden B, Dodd N, Sanson-Fisher R. Effectiveness of interventions utilising telephone follow up in reducing hospital readmission within 30 days for individuals with chronic disease: a systematic review. *BMC health services research.* 2016.
368. Lavender T, Richens Y, Milan SJ, Smyth RM, Dowswell T. Telephone support for women during pregnancy and the first six weeks postpartum. *Cochrane Database Syst Rev.* 2013(7):CD009338.
369. Lins S, Hayder-Beichel D, Rucker G, Motschall E, Antes G, Meyer G, et al. Efficacy and experiences of telephone counselling for informal carers of people with dementia. *Cochrane Database Syst Rev.* 2014(9):CD009126.
370. Stead LF, Hartmann-Boyce J, Perera R, Lancaster T. Telephone counselling for smoking cessation. *Cochrane Database Syst Rev.* 2013(8):CD002850.
371. Yasmin F, Banu B, Zakir SM, Sauerborn R, Ali L, Souares A. Positive influence of short message service and voice call interventions on adherence and health outcomes in case of chronic disease care: a systematic review. *BMC Med Inform Decis Mak.* 2016;16:46.
372. Zhou M, Holden L, Bedard G, Zeng L, Lam H, Chu D, et al. The utilization of telephone follow-up in the advanced cancer population: a review of the literature. *Journal of comparative effectiveness research.* 2012;1(6):509-17.
373. Vargas G, Cajita MI, Whitehouse E, Han HR. Use of Short Messaging Service for Hypertension Management: A Systematic Review. *The Journal of cardiovascular nursing.* 2016.
374. Aardoom JJ, Dingemans AE, Spinhoven P, Van Furth EF. Treating eating disorders over the internet: a systematic review and future research directions. *Int J Eat Disord.* 2013;46(6):539-52.
375. Annaim A, Lassiter M, Viera AJ, Ferris M. Interactive media for parental education on managing children chronic condition: a systematic review of the literature. *BMC pediatrics.* 2015;15(1):201.
376. Beishuizen CR, Stephan BC, van Gool WA, Brayne C, Peters RJ, Andrieu S, et al. Web-Based Interventions Targeting Cardiovascular Risk Factors in Middle-Aged and Older People: A Systematic Review and Meta-Analysis. *Journal of medical Internet research.* 2016;18(3):e55.
377. Brijnath B, Protheroe J, Mahtani KR, Antoniadis J. Do Web-based Mental Health Literacy Interventions Improve the Mental Health Literacy of Adult Consumers? Results From a Systematic Review. *J Med Internet Res.* 2016;18(6):e165.
378. Brown M, Glendenning A, Hoon AE, John A. Effectiveness of Web-Delivered Acceptance and Commitment Therapy in Relation to Mental Health and Well-Being: A Systematic Review and Meta-Analysis. *Journal of medical Internet research.* 2016;18(8):e221.
379. Chan JY, Hirai, H. W. and Tsoi, K. K. Can computer-assisted cognitive remediation improve employment and productivity outcomes of patients with severe mental illness? A meta-analysis of prospective controlled trials. *Journal of psychiatric research.* 2015.
380. Chebli JL, Blaszczyński A, Gainsbury SM. Internet-Based Interventions for Addictive Behaviours: A Systematic Review. *Journal of gambling studies.* 2016;32(4):1279-304.

381. Cotter AP, Durant N, Agne AA, Cherrington AL. Internet interventions to support lifestyle modification for diabetes management: a systematic review of the evidence. *J Diabetes Complications*. 2014;28(2):243-51.
382. de Jong CC, Ros WJ, Schrijvers G. The effects on health behavior and health outcomes of Internet-based asynchronous communication between health providers and patients with a chronic condition: a systematic review. *Journal of medical Internet research*. 2014;16(1):e19.
383. Dettore D, Pozza A, Andersson G. Efficacy of technology-delivered cognitive behavioural therapy for OCD versus control conditions, and in comparison with therapist-administered CBT: meta-analysis of randomized controlled trials. *Cogn Behav Ther*. 2015;44(3):190-211.
384. Devi R, Singh SJ, Powell J, Fulton EA, Igbinedion E, Rees K. Internet-based interventions for the secondary prevention of coronary heart disease. *Cochrane Database Syst Rev*. 2015(12):CD009386.
385. Dolemeier R, Tietjen A, Kersting A, Wagner B. Internet-based interventions for eating disorders in adults: a systematic review. *BMC Psychiatry*. 2013;13:207.
386. Fish J, Brimson J, Lynch S. Mindfulness Interventions Delivered by Technology Without Facilitator Involvement: What Research Exists and What Are the Clinical Outcomes? *Mindfulness*. 2016;7(5):1011-23.
387. Foster C, Richards, J., Thorogood, M., Hillsdon, M. Remote and web 2.0 interventions for promoting physical activity. *Cochrane Database of Systematic Reviews*. 2013.
388. Garg S, Garg D, Turin TC, Chowdhury MF. Web-Based Interventions for Chronic Back Pain: A Systematic Review. *Journal of medical Internet research*. 2016;18(7):e139.
389. Graham AL, Carpenter KM, Cha S, Cole S, Jacobs MA, Raskob M, et al. Systematic review and meta-analysis of Internet interventions for smoking cessation among adults. *Substance abuse and rehabilitation*. 2016.
390. Grist RaC, K. Computerised Cognitive Behavioural Therapy for Common Mental Health Disorders, What Works, for Whom Under What Circumstances? A Systematic Review and Meta-analysis. *Journal of contemporary psychotherapy*. 2013.
391. Hidalgo-Mazzei D, Mateu A, Reinares M, Matic A, Vieta E, Colom F. Internet-based psychological interventions for bipolar disorder: Review of the present and insights into the future. *Journal of affective disorders*. 2015;188:1-13.
392. Hou SI, Charlery SA, Roberson K. Systematic literature review of Internet interventions across health behaviors. *Health Psychol Behav Med*. 2014;2(1):455-81.
393. Joo JY. Effectiveness of Web-Based Interventions for Managing Diabetes in Korea. *Computers, informatics, nursing : CIN*. 2016;34(12):587-600.
394. Kauppi K, Välimäki, M, Hätönen, H.M., Kuosmanen, L.M., Warwick-Smith, K. Information and communication technology based prompting for treatment compliance for people with serious mental illness. *Cochrane Database of Systematic Reviews*. 2014.
395. Kim AR, Park HA. Web-based Self-management Support Interventions for Cancer Survivors: A Systematic Review and Meta-analyses. *Studies in health technology and informatics*. 2015;216:142-7.
396. Kreuze E, Jenkins C, Gregoski M, York J, Mueller M, Lamis DA, et al. Technology-enhanced suicide prevention interventions: A systematic review of the current state of the science. *Journal of telemedicine and telecare*. 2016;23(6):605-17.
397. L CaD, C. Effectiveness of web-based psychological interventions for depression: a meta-analysis. *International Journal of Mental Health and Addiction*. 2013.
398. Lai MH, Maniam T, Chan LF, Ravindran AV. Caught in the web: a review of web-based suicide prevention. *Journal of medical Internet research*. 2014;16(1):e30.
399. Lau Y, Htun TP, Wong SN, Tam WS, Klainin-Yobas P. Efficacy of Internet-Based Self-Monitoring Interventions on Maternal and Neonatal Outcomes in Perinatal Diabetic Women: A Systematic Review and Meta-Analysis. *Journal of medical Internet research*. 2016;18(8):e220.

400. Lee EW, Denison FC, Hor K, Reynolds RM. Web-based interventions for prevention and treatment of perinatal mood disorders: a systematic review. *BMC pregnancy and childbirth*. 2016;16(1):38.
401. Noh D, Park YS, Oh EG. Effectiveness of Telephone-Delivered Interventions Following Suicide Attempts: A Systematic Review. *Archives of psychiatric nursing*. 2016;30(1):114-9.
402. Olthuis JV, Watt MC, Bailey K, Hayden JA, Stewart SH. Therapist-supported Internet cognitive behavioural therapy for anxiety disorders in adults. *Cochrane Database Syst Rev*. 2016;3:CD011565.
403. Pal K, Eastwood SV, Michie S, Farmer AJ, Barnard ML, Peacock R, et al. Computer-based diabetes self-management interventions for adults with type 2 diabetes mellitus. *Cochrane Database Syst Rev*. 2013(3):CD008776.
404. Păsăreanu CR, Andersson G, Bergman Nordgren L, Dobrea A. Internet-delivered transdiagnostic and tailored cognitive behavioral therapy for anxiety and depression: a systematic review and meta-analysis of randomized controlled trials. *Cognitive behaviour therapy*. 2016;46(1):1-28.
405. Perry Y, Werner-Seidler A, Calear AL, Christensen H. Web-Based and Mobile Suicide Prevention Interventions for Young People: A Systematic Review. *J Can Acad Child Adolesc Psychiatry*. 2016;25(2):73-9.
406. Podina IR, Mogoase C, David D, Szentagotai A, Dobrea A. A meta-analysis on the efficacy of technology mediated CBT for anxious children and adolescents. *Journal of Rational-Emotive & Cognitive-Behavior Therapy*. 2016;34(1).
407. Ramdoss S, Machalicek W, Rispoli M, Mulloy A, Lang R, O'Reilly M. Computer-based interventions to improve social and emotional skills in individuals with autism spectrum disorders: a systematic review. *Dev Neurorehabil*. 2012;15(2):119-35.
408. Reyes-Portillo JA, Mufson L, Greenhill LL, Gould MS, Fisher PW, Tarlow N, et al. Web-Based Interventions for Youth Internalizing Problems: A Systematic Review. *Journal of the American Academy of Child and Adolescent Psychiatry*. 2014;53(12):1254-70.e5.
409. Richards J, Thorogood M, Hillsdon M, Foster C. Face-to-face versus remote and web 2.0 interventions for promoting physical activity. *Cochrane Database Syst Rev*. 2013(9):CD010393.
410. Saddichha S, Al-Desouki M, Lamia A, Linden IA, Krausz M. Online interventions for depression and anxiety - a systematic review. *Health Psychol Behav Med*. 2014;2(1):841-81.
411. Sander L, Rausch L, Baumeister H. Effectiveness of Internet-Based Interventions for the Prevention of Mental Disorders: A Systematic Review and Meta-Analysis. *JMIR mental health*. 2016;3(3):e38.
412. Schlegl S, Bürger C, Schmidt L, Herbst N, Voderholzer U. The Potential of Technology-Based Psychological Interventions for Anorexia and Bulimia Nervosa: A Systematic Review and Recommendations for Future Research. *Journal of medical Internet research*. 2015;17(3):e85.
413. Sherrington A, Newham JJ, Bell R, Adamson A, McColl E, Araujo-Soares V. Systematic review and meta-analysis of internet-delivered interventions providing personalized feedback for weight loss in overweight and obese adults. *Obes Rev*. 2016;17(6):541-51.
414. Sijbrandij M, Kunovski I, Cuijpers P. Effectiveness of Internet-Delivered Cognitive Behavioral Therapy for Posttraumatic Stress Disorder: A Systematic Review and Meta-Analysis. *Depress Anxiety*. 2016;33(9):783-91.
415. Spijkerman MPJ, Pots WTM, Bohlmeijer ET. Effectiveness of online mindfulness-based interventions in improving mental health: A review and meta-analysis of randomised controlled trials. *Clinical Psychology Review*. 2016;45:102-14.
416. Stellefson M, Chaney B, Barry AE, Chavarria E, Tennant B, Walsh-Childers K, et al. Web 2.0 chronic disease self-management for older adults: a systematic review. *Journal of medical Internet research*. 2013;15(2):e35.
417. Taylor GMJ, Dalili MN, Semwal M, Civljak M, Sheikh A, Car J. Internet-based interventions for smoking cessation. *Cochrane Database Syst Rev*. 2017;9:CD007078.



418. Twomey C, O'Reilly G. Effectiveness of a freely available computerised cognitive behavioural therapy programme (MoodGYM) for depression: Meta-analysis. *Aust N Z J Psychiatry*. 2017;51(3):260-9.
419. Ye YY, Zhang YF, Chen J, Liu J, Li XJ, Liu YZ, et al. Internet-Based Cognitive Behavioral Therapy for Insomnia (ICBT-i) Improves Comorbid Anxiety and Depression-A Meta-Analysis of Randomized Controlled Trials. *PLoS One*. 2015;10(11):e0142258.
420. Zachariae R, Lyby MS, Ritterband LM, O'Toole MS. Efficacy of internet-delivered cognitive-behavioral therapy for insomnia - A systematic review and meta-analysis of randomized controlled trials. *Sleep medicine reviews*. 2015;30:1-10.
421. Eccleston C FE, Craig L, Duggan JB, Rosser BA, Keogh E. Psychological therapies (Internet?delivered) for the management of chronic pain in adults. *Cochrane Database of Systematic Reviews*. 2014.
422. Wootton BM. Remote cognitive-behavior therapy for obsessive-compulsive symptoms: A meta-analysis. *Clinical Psychology Review*. 2016;43:103-13.
423. Hall N, Boisvert M, Steele R. Telepractice in the assessment and treatment of individuals with aphasia: a systematic review. *Int J Telerehabil*. 2013;5(1):27-38.
424. Meyer B, Atherton H, Sawmynaden P, Car J. Email for communicating results of diagnostic medical investigations to patients. *Cochrane Database Syst Rev*. 2012(8):Cd007980.
425. Sawmynaden P, Atherton H, Majeed A, Car J. Email for the provision of information on disease prevention and health promotion. *Cochrane Database Syst Rev*. 2012;11:CD007982.
426. Atherton H, Sawmynaden, P., Sheikh, A., Majeed, A., Car, J. Email for clinical communication between patients/caregivers and healthcare professionals. *Cochrane Database of Systematic Reviews*. 2012.
427. de Jongh T, Gurol-Urganci I, Vodopivec-Jamsek V, Car J, Atun R. Mobile phone messaging for facilitating self-management of long-term illnesses. *Cochrane Database Syst Rev*. 2012;12:CD007459.
428. Ershad Sarabi R, Sadoughi F, Jamshidi Orak R, Bahaadinbeigy K. The Effectiveness of Mobile Phone Text Messaging in Improving Medication Adherence for Patients with Chronic Diseases: A Systematic Review. *Iran Red Crescent Med J*. 2016;18(5):e25183.
429. Finitis DJ, Pellowski JA, Johnson BT. Text message intervention designs to promote adherence to antiretroviral therapy (ART): a meta-analysis of randomized controlled trials. *PLoS One*. 2014;9(2):e88166.
430. Head KJ, Noar SM, Iannarino NT, Grant Harrington N. Efficacy of text messaging-based interventions for health promotion: a meta-analysis. *Social science & medicine (1982)*. 2013;97:41-8.
431. Scott-Sheldon LA, Lantini R, Jennings EG, Thind H, Rosen RK, Salmoirago-Blotcher E, et al. Text Messaging-Based Interventions for Smoking Cessation: A Systematic Review and Meta-Analysis. *JMIR mHealth and uHealth*. 2016;4(2):e49.
432. Siopis G, Chey, T. and Allman-Farinelli, M. A systematic review and meta-analysis of interventions for weight management using text messaging. *Journal of human nutrition and dietetics : the official journal of the British Dietetic Association*. 2014.
433. Thakkar J, Kurup R, Laba TL, Santo K, Thiagalingam A, Rodgers A, et al. Mobile Telephone Text Messaging for Medication Adherence in Chronic Disease: A Meta-analysis. *JAMA Intern Med*. 2016;176(3):340-9.
434. Vodopivec-Jamsek V, de Jongh T, Gurol-Urganci I, Atun R, Car J. Mobile phone messaging for preventive health care. *Cochrane Database Syst Rev*. 2012;12:CD007457.
435. Wald DS, Butt S, Bestwick JP. One-way versus two-way text messaging on improving medication adherence: meta-analysis of randomized trials. *The American journal of medicine*. 2015;128(10):1139.e1-5.
436. Watson T, Simpson S, Hughes C. Text messaging interventions for individuals with mental health disorders including substance use: A systematic review. *Psychiatry research*. 2016;243:255-62.

437. GuroI-Urganci I, de Jongh, T., Vodopivec-Jamsek, V., Atun, R. and Car, J. Mobile phone messaging reminders for attendance at healthcare appointments. *Cochrane Database of Systematic Reviews*. 2013.
438. Direito A, Carraça E, Rawstorn J, Whittaker R, Maddison R. mHealth Technologies to Influence Physical Activity and Sedentary Behaviors: Behavior Change Techniques, Systematic Review and Meta-Analysis of Randomized Controlled Trials. *Annals of behavioral medicine : a publication of the Society of Behavioral Medicine*. 2016;51(2):226-39.
439. Lin H, Wu X. Intervention strategies for improving patient adherence to follow-up in the era of mobile information technology: a systematic review and meta-analysis. *PLoS One*. 2014;9(8):e104266.
440. Alwashmi M, Hawboldt J, Davis E, Marra C, Gamble JM, Abu Ashour W. The Effect of Smartphone Interventions on Patients With Chronic Obstructive Pulmonary Disease Exacerbations: A Systematic Review and Meta-Analysis. *JMIR mHealth and uHealth*. 2016;4(3):e105.
441. Braun R, Catalani C, Wimbush J, Israelski D. Community health workers and mobile technology: a systematic review of the literature. *PLoS One*. 2013;8(6):e65772.
442. Afshin A, Babalola D, McLean M, Yu Z, Ma W, Chen CY, et al. Information Technology and Lifestyle: A Systematic Evaluation of Internet and Mobile Interventions for Improving Diet, Physical Activity, Obesity, Tobacco, and Alcohol Use. *Journal of the American Heart Association*. 2016;5(9).
443. Barello S, Triberti S, Graffigna G, Libreri C, Serino S, Hibbard J, et al. eHealth for Patient Engagement: A Systematic Review. *Front Psychol*. 2015;6:2013.
444. Berrouiguet S, Baca-García E, Brandt S, Walter M, Courtet P. Fundamentals for Future Mobile-Health (mHealth): A Systematic Review of Mobile Phone and Web-Based Text Messaging in Mental Health. *Journal of medical Internet research*. 2016;18(6):e135.
445. Cajita MI, Gleason KT, Han HR. A Systematic Review of mHealth-Based Heart Failure Interventions. *The Journal of cardiovascular nursing*. 2016;31(3):E10-22.
446. Capurro D, Ganzinger M, Perez-Lu J, Knaup P. Effectiveness of eHealth interventions and information needs in palliative care: a systematic literature review. *Journal of medical Internet research*. 2014;16(3):e72.
447. Chen YR, Schulz PJ. The Effect of Information Communication Technology Interventions on Reducing Social Isolation in the Elderly: A Systematic Review. *J Med Internet Res*. 2016;18(1):e18.
448. Conway N, Webster C, Smith B, Wake D. eHealth and the use of individually tailored information: A systematic review. *Health informatics journal*. 2016.
449. Free C, Phillips G, Watson L, Galli L, Felix L, Edwards P, et al. The effectiveness of mobile-health technologies to improve health care service delivery processes: a systematic review and meta-analysis. *PLoS Med*. 2013;10(1):e1001363.
450. Gregersen TL, Green A, Frausing E, Ringbaek T, Brondum E, Suppli Ulrik C. Do telemedical interventions improve quality of life in patients with COPD? A systematic review. *International journal of chronic obstructive pulmonary disease*. 2016;11:809-22.
451. Jackson BD, Gray K, Knowles SR, De Cruz P. EHealth Technologies in Inflammatory Bowel Disease: A Systematic Review. *Journal of Crohn's & colitis*. 2016;10(9):1103-21.
452. Jackson D, Roberts G, Wu ML, Ford R, Doyle C. A systematic review of the effect of telephone, internet or combined support for carers of people living with Alzheimer's, vascular or mixed dementia in the community. *Archives of gerontology and geriatrics*. 2016;66:218-36.
453. Koblauch H, Reinhardt SM, Lissau W, Jensen PL. The effect of telepsychiatric modalities on reduction of readmissions in psychiatric settings: A systematic review. *Journal of telemedicine and telecare*. 2016.
454. Lin MH, Yuan WL, Huang TC, Zhang HF, Mai JT, Wang JF. The clinical effectiveness of telemedicine for chronic heart failure: A systematic review and meta-analysis. *Minerva medica*. 2016.



455. Naslund JA, Marsch LA, McHugo GJ, Bartels SJ. Emerging mHealth and eHealth interventions for serious mental illness: a review of the literature. *Journal of mental health (Abingdon, England)*. 2015;24(5):1-12.
456. Omaki E, Rizzutti N, Shields W, Zhu J, McDonald E, Stevens MW, et al. A systematic review of technology-based interventions for unintentional injury prevention education and behaviour change. *Injury prevention : journal of the International Society for Child and Adolescent Injury Prevention*. 2017;23(2):138-46.
457. Schnall R, Travers J, Rojas M, Carballo-Diéguez A. eHealth interventions for HIV prevention in high-risk men who have sex with men: a systematic review. *Journal of medical Internet research*. 2014;16(5):e134.
458. Seo DC, Niu J. Evaluation of Internet-Based Interventions on Waist Circumference Reduction: A Meta-Analysis. *Journal of medical Internet research*. 2015;17(7):e181.
459. Su D, Zhou J, Kelley MS, Michaud TL, Siahpush M, Kim J, et al. Does telemedicine improve treatment outcomes for diabetes? A meta-analysis of results from 55 randomized controlled trials. *Diabetes Research & Clinical Practice*. 2016;116:136-48.
460. van der Meij E, Anema JR, Otten RH, Huirne JA, Schaafsma FG. The Effect of Perioperative E-Health Interventions on the Postoperative Course: A Systematic Review of Randomised and Non-Randomised Controlled Trials. *PLoS One*. 2016;11(7):e0158612.
461. Zhao J, Zhai YK, Zhu WJ, Sun DX. Effectiveness of Telemedicine for Controlling Asthma Symptoms: A Systematic Review and Meta-analysis. *Telemedicine journal and e-health : the official journal of the American Telemedicine Association*. 2014;21(6):484-92.
462. Hobson EV, Baird WO, Cooper CL, Mawson S, Shaw PJ, McDermott CJ. Using technology to improve access to specialist care in amyotrophic lateral sclerosis: A systematic review. *Amyotrophic lateral sclerosis & frontotemporal degeneration*. 2016;17(5-6):1-12.
463. Lam LT, Lam MK. eHealth Intervention for Problematic Internet Use (PIU). *Current psychiatry reports*. 2016;18(12):107.
464. Su D, McBride C, Zhou J, Kelley MS. Does nutritional counseling in telemedicine improve treatment outcomes for diabetes? A systematic review and meta-analysis of results from 92 studies. *Journal of telemedicine and telecare*. 2015;22(6):333-47.
465. Amatya B, Galea MP, Kesselring J, Khan F. Effectiveness of telerehabilitation interventions in persons with multiple sclerosis: A systematic review. *Multiple sclerosis and related disorders*. 2015;4(4):358-69.
466. Budrionis A, Augestad KM, Patel HR, Bellika JG. An evaluation framework for defining the contributions of telestration in surgical telementoring. *Interactive journal of medical research*. 2013;2(2):e14.
467. He T, Liu X, Li Y, Wu Q, Liu M, Yuan H. Remote home management for chronic kidney disease: A systematic review. *Journal of telemedicine and telecare*. 2016;23(1):3-13.
468. Kew KM, Cates CJ. Remote versus face-to-face check-ups for asthma. *Cochrane Database Syst Rev*. 2016;4:CD011715.
469. Klersy C, Boriani G, De Silvestri A, Mairesse GH, Braunschweig F, Scotti V, et al. Effect of telemonitoring of cardiac implantable electronic devices on healthcare utilization: a meta-analysis of randomized controlled trials in patients with heart failure. *Eur J Heart Fail*. 2016;18(2):195-204.
470. Pandor A, Gomersall T, Stevens JW, Wang J, Al-Mohammad A, Bakhai A, et al. Remote monitoring after recent hospital discharge in patients with heart failure: a systematic review and network meta-analysis. *Heart*. 2013;99(23):1717-26.
471. Vegesna A, Tran M, Angelaccio M, Arcona S. Remote Patient Monitoring via Non-Invasive Digital Technologies: A Systematic Review. *Telemed J E Health*. 2017;23(1):3-17.
472. Antoniou SA, Antoniou GA, Franzen J, Bollmann S, Koch OO, Pointner R, et al. A comprehensive review of telementoring applications in laparoscopic general surgery. *Surg Endosc*. 2012;26(8):2111-6.

473. Kew KM, Cates CJ. Home telemonitoring and remote feedback between clinic visits for asthma. *Cochrane Database of Systematic Reviews*. 2016(8).
474. Aguas Peris M, Del Hoyo J, Bebia P, Faubel R, Barrios A, Bastida G, et al. Telemedicine in Inflammatory Bowel Disease: Opportunities and Approaches. *Inflammatory bowel diseases*. 2014;21(2):392-9.
475. Amadi-Obi A, Gilligan P, Owens N, O'Donnell C. Telemedicine in pre-hospital care: a review of telemedicine applications in the pre-hospital environment. *Int J Emerg Med*. 2014;7:29.
476. Car LT, Gentry S, Hmmt van-Velthoven, M., Car, J. Telephone communication of HIV testing results for improving knowledge of HIV infection status. *Cochrane Database of Systematic Reviews*. 2013.
477. Edirippulige S, Martin-Khan M, Beattie E, Smith AC, Gray LC. A systematic review of telemedicine services for residents in long term care facilities. *Journal of telemedicine and telecare*. 2013;19(3).
478. Flodgren G, Rachas A, Farmer AJ, Inzitari M, Shepperd S. Interactive telemedicine: effects on professional practice and health care outcomes. *Cochrane Database Syst Rev*. 2015(9):CD002098.
479. Hilgart JS, Hayward JA, Coles B, Iredale R. Telegenetics: a systematic review of telemedicine in genetics services. *Genetics in medicine : official journal of the American College of Medical Genetics*. 2012;14(9):765-76.
480. Jhaveri D, Larkins S, Sabesan S. Telestroke, tele-oncology and teledialysis: a systematic review to analyse the outcomes of active therapies delivered with telemedicine support. *Journal of telemedicine and telecare*. 2015;21(4):181-8.
481. Marcolino MS, Maia JX, Alkmim MB, Boersma E, Ribeiro AL. Telemedicine application in the care of diabetes patients: systematic review and meta-analysis. *PLoS One*. 2013;8(11):e79246.
482. Rasekaba TM, Furler J, Blackberry I, Tacey M, Gray K, Lim K. Telemedicine interventions for gestational diabetes mellitus: A systematic review and meta-analysis. *Diabetes research and clinical practice*. 2015;110(1):1-9.
483. Tan IJ, Dobson LP, Bartnik S, Muir J, Turner AW. Real-time teleophthalmology versus face-to-face consultation: A systematic review. *Journal of telemedicine and telecare*. 2016;23(7):629-38.
484. Tan K, Lai NM. Telemedicine for the support of parents of high-risk newborn infants. *Cochrane Database Syst Rev*. 2012(6):CD006818.
485. Thomas SM, Jeyaraman MM, Hodge WG, Hutnik C, Costella J, Malvankar-Mehta MS. The effectiveness of teleglaucoma versus in-patient examination for glaucoma screening: a systematic review and meta-analysis. *PLoS One*. 2014;9(12):e113779.
486. Zandbelt LC, de Kanter FE, Ubbink DT. E-consulting in a medical specialist setting: Medicine of the future? Patient education and counseling. 2015;99(5):689-705.
487. Donoghue K, Patton R, Phillips T, Deluca P, Drummond C. The effectiveness of electronic screening and brief intervention for reducing levels of alcohol consumption: a systematic review and meta-analysis. *Journal of medical Internet research*. 2014;16(6):e142.
488. Tansil KA, Esser MB, Sandhu P, Reynolds JA, Elder RW, Williamson RS, et al. Alcohol Electronic Screening and Brief Intervention: A Community Guide Systematic Review. *American journal of preventive medicine*. 2016;51(5):801-11.
489. Bittner AK, Wykstra SL, Yoshinaga PD, Li T. Telerehabilitation for people with low vision. *Cochrane Database Syst Rev*. 2015;8:CD011019.
490. Cottrell MA, Galea OA, O'Leary SP, Hill AJ, Russell TG. Real-time telerehabilitation for the treatment of musculoskeletal conditions is effective and comparable to standard practice: a systematic review and meta-analysis. *Clin Rehabil*. 2017;31(5):625-38.
491. Khan F, Amatya, B., Kesselring, J. and Galea, M. Telerehabilitation for persons with multiple sclerosis. *Cochrane Database of Systematic Reviews*. 2015.
492. Laver KE, Schoene D, Crotty M, George S, Lannin NA, Sherrington C. Telerehabilitation services for stroke. *Cochrane Database Syst Rev*. 2013(12):CD010255.

493. Shukla H, Nair SR, Thakker D. Role of telerehabilitation in patients following total knee arthroplasty: Evidence from a systematic literature review and meta-analysis. *Journal of telemedicine and telecare*. 2016;23(2):339-46.
494. Adedoyin AC, Sherr ME, Adedoyin OO, Royse DD, Jackson MS, Adu-Boahene AB. The Characteristics of Effective Cancer Education Media Interventions among African Americans: A Systematic Review. *Journal of evidence-informed social work*. 2015;13(4):1-14.
495. Alfred M, Ubogaya K, Chen X, Wint D, Worrall PS. Effectiveness of culturally focused interventions in increasing the satisfaction of hospitalized Asian patients: a systematic review. *JBI Database System Rev Implement Rep*. 2016;14(8):219-56.
496. Antonio MC, Chung-Do JJ. Systematic review of interventions focusing on Indigenous adolescent mental health and substance use. *American Indian and Alaska native mental health research (Online)*. 2015;22(3):36-56.
497. Attridge M, Creamer, J., Ramsden, M., Cannings-John, R., Hawthorne, K. Culturally appropriate health education for people in ethnic minority groups with type 2 diabetes mellitus. *Cochrane Database of Systematic Reviews*. 2014.
498. Coast E, Jones E, Lattof SR, Portela A. Effectiveness of interventions to provide culturally appropriate maternity care in increasing uptake of skilled maternity care: a systematic review. *Health Policy Plan*. 2016;31(10):1479-91.
499. Escribà-Agüir V, Rodríguez-Gómez M, Ruiz-Pérez I. Effectiveness of patient-targeted interventions to promote cancer screening among ethnic minorities: A systematic review. *Cancer epidemiology*. 2016;44:22-39.
500. Leske S, Harris MG, Charlson FJ, Ferrari AJ, Baxter AJ, Logan JM, et al. Systematic review of interventions for Indigenous adults with mental and substance use disorders in Australia, Canada, New Zealand and the United States. *Aust N Z J Psychiatry*. 2016;50(11):1040-54.
501. Lood Q, Häggblom-Kronlöf G, Dahlin-Ivanoff S. Health promotion programme design and efficacy in relation to ageing persons with culturally and linguistically diverse backgrounds: a systematic literature review and meta-analysis. *BMC health services research*. 2015;15(1):560.
502. Washio Y, Cassey H. Systematic Review of Interventions for Racial/Ethnic-Minority Pregnant Smokers. *J Smok Cessat*. 2016;11(1):12-27.
503. Aslam RhW, Hendry M, Booth A, Carter B, Charles JM, Craine N, et al. Intervention Now to Eliminate Repeat Unintended Pregnancy in Teenagers (INTERUPT): a systematic review of intervention effectiveness and cost-effectiveness, and qualitative and realist synthesis of implementation factors and user engagement. *BMC Medicine*. 2017;15(1):155.
504. Health Quality O. Interventions to Improve Access to Primary Care for People Who Are Homeless: A Systematic Review. *Ontario health technology assessment series*. 2016;16(9):1-50.
505. Anderson LM, Adeney, K. L., Shinn, C., Safranek, S., Buckner-Brown, J. and Krause, L. K. Community coalition-driven interventions to reduce health disparities among racial and ethnic minority populations. *Cochrane Database of Systematic Reviews*. 2015.
506. Gottlieb LM, Garcia K, Wing H, Manchanda R. Clinical interventions addressing nonmedical health determinants in Medicaid managed care. *Am J Manag Care*. 2016;22(5):370-6.
507. Nierkens V, Hartman MA, Nicolaou M, Vissenberg C, Beune EJ, Hosper K, et al. Effectiveness of cultural adaptations of interventions aimed at smoking cessation, diet, and/or physical activity in ethnic minorities. a systematic review. *PLoS One*. 2013;8(10):e73373.
508. Antoine SL, Pieper D, Mathes T, Eikermann M. Improving the adherence of type 2 diabetes mellitus patients with pharmacy care: a systematic review of randomized controlled trials. *BMC Endocr Disord*. 2014;14:53.
509. Chaiyachati KH, Ogbuaji O, Price M, Suthar AB, Negussie EK, Bärnighausen T. Interventions to improve adherence to antiretroviral therapy: a rapid systematic review. *AIDS (London, England)*. 2014;28 Suppl 2(SUPPL. 2):S187-204.
510. Farmer AJ, McSharry, J., Rowbotham, S., McGowan, L., Ricci-Cabello, I. and French, D. P. Effects of interventions promoting monitoring of medication use and brief messaging on medication

- adherence for people with Type 2 diabetes: a systematic review of randomized trials. *Diabetic medicine : a journal of the British Diabetic Association*. 2015.
511. Hu D, Juarez DT, Yeboah M, Castillo TP. Interventions to increase medication adherence in African-American and Latino populations: a literature review. *Hawai'i journal of medicine & public health : a journal of Asia Pacific Medicine & Public Health*. 2014;73(1):11-8.
512. Nieuwlaat R, Wilczynski N, Navarro T, Hobson N, Jeffery R, Keepanasseril A, et al. Interventions for enhancing medication adherence. *Cochrane Database Syst Rev*. 2014(11):CD000011.
513. Njie GJ, Finnie RK, Acharya SD, Jacob V, Proia KK, Hopkins DP, et al. Reducing Medication Costs to Prevent Cardiovascular Disease: A Community Guide Systematic Review. *Prev Chronic Dis*. 2015;12:E208.
514. Ruppbar TM, Cooper PS, Mehr DR, Delgado JM, Dunbar-Jacob JM. Medication Adherence Interventions Improve Heart Failure Mortality and Readmission Rates: Systematic Review and Meta-Analysis of Controlled Trials. *Journal of the American Heart Association*. 2016;5(6).
515. Sapkota S, Brien JA, Greenfield J, Aslani P. A systematic review of interventions addressing adherence to anti-diabetic medications in patients with type 2 diabetes--impact on adherence. *PLoS One*. 2015;10(2):e0118296.
516. van Driel ML, Morledge MD, Ulep R, Shaffer JP, Davies P, Deichmann R. Interventions to improve adherence to lipid-lowering medication. *Cochrane Database Syst Rev*. 2016;12:CD004371.
517. Viswanathan M, Golin CE, Jones CD, Ashok M, Blalock S, Wines RC, et al. Closing the quality gap: revisiting the state of the science (vol. 4: medication adherence interventions: comparative effectiveness). Evidence report/technology assessment. 2012(208.4):1-685.
518. Viswanathan M, Golin CE, Jones CD, Ashok M, Blalock SJ, Wines RC, et al. Interventions to improve adherence to self-administered medications for chronic diseases in the United States: a systematic review. *Ann Intern Med*. 2012;157(11):785-95.
519. Smith SM, Wallace E, O'Dowd T, Fortin M. Interventions for improving outcomes in patients with multimorbidity in primary care and community settings. *Cochrane Database Syst Rev*. 2016;3:CD006560.
520. Leppin AL, Gionfriddo MR, Kessler M, Brito JP, Mair FS, Gallacher K, et al. Preventing 30-day hospital readmissions: a systematic review and meta-analysis of randomized trials. *JAMA Intern Med*. 2014;174(7):1095-107.
521. Chaudhuri D, Montgomery A, Gulenchyn K, Mitchell M, Joseph P. Effectiveness of Quality Improvement Interventions at Reducing Inappropriate Cardiac Imaging: A Systematic Review and Meta-Analysis. *Circulation Cardiovascular quality and outcomes*. 2016.
522. Jenkins HJ, Hancock, M. J., French, S. D., Maher, C. G., Engel, R. M. and Magnussen, J. S. Effectiveness of interventions designed to reduce the use of imaging for low-back pain: a systematic review. *CMAJ : Canadian Medical Association journal = journal de l'Association medicale canadienne*. 2015.
523. Thomas RE, Vaska M, Naugler C, Turin TC. Interventions at the laboratory level to reduce laboratory test ordering by family physicians: Systematic review. *Clinical biochemistry*. 2015;48(18):1358-65.
524. Kynoch K, Chang A, Coyer F, McArdle A. The effectiveness of interventions to meet family needs of critically ill patients in an adult intensive care unit: a systematic review update. *JBIC Database System Rev Implement Rep*. 2016;14(3):181-234.
525. Lopez LM, Steiner M, Grimes DA, Hilgenberg D, Schulz KF. Strategies for communicating contraceptive effectiveness. *Cochrane Database Syst Rev*. 2013(4):CD006964.
526. Marcelino CA, Díaz LJ, Da Cruz DM. The effectiveness of interventions in managing treatment adherence in adult heart transplant patients: a systematic review. *JBIC database of systematic reviews and implementation reports*. 2015;13(9):279-308.
527. Wu YP, Pai AL. Health care provider-delivered adherence promotion interventions: a meta-analysis. *Pediatrics*. 2014;133(6):e1698-707.

528. Greene JA, Bina R, Gum AM. Interventions to Increase Retention in Mental Health Services: A Systematic Review. *Psychiatric services (Washington, DC)*. 2016;67(5):485-95.
529. Crocker-Buque T, Edelstein M, Mounier-Jack S. Interventions to reduce inequalities in vaccine uptake in children and adolescents aged <19 years: a systematic review. *J Epidemiol Community Health*. 2017;71(1):87-97.
530. Sadaf A, Richards JL, Glanz J, Salmon DA, Omer SB. A systematic review of interventions for reducing parental vaccine refusal and vaccine hesitancy. *Vaccine*. 2013;31(40):4293-304.
531. Thomas RE, Lorenzetti DL. Interventions to increase influenza vaccination rates of those 60 years and older in the community. *Cochrane Database Syst Rev*. 2014(7):CD005188.
