# Supplementary material for: Identifying alternative models of healthcare service delivery to inform health system improvement: scoping review of systematic reviews
Source: PubMed Central journal article supplement — BMJ Open. 2020 Mar 29;10(3):e036112. doi: 10.1136/bmjopen-2019-036112 (PMC7170607; doi:10.1136/bmjopen-2019-036112), 2020-03-29
Supplement: bmjopen-2019-036112supp003.pdf [file bmjopen-2019-036112supp003.pdf]

## Supplementary file 3

**Table: Summary of health conditions represented in included reviews organised by EPOC Taxonomy of delivery arrangement interventions**

| EPOC Taxonomy category and health condition                                    | No. of Reviews |
|--------------------------------------------------------------------------------|----------------|
| <b>How and when care is delivered (n=47)</b>                                   |                |
| Acute respiratory infections                                                   | 2              |
| Aging (general)                                                                | 3              |
| Asthma                                                                         | 1              |
| Chronic conditions (multiple included in review or multi-morbidity)            | 4              |
| Chronic non-cancer pain                                                        | 1              |
| Critically ill                                                                 | 2              |
| Diabetes                                                                       | 1              |
| Human immunodeficiency virus (HIV)                                             | 1              |
| Maternal and child health                                                      | 7              |
| Mental health                                                                  | 1              |
| Musculoskeletal conditions                                                     | 1              |
| Oral health                                                                    | 1              |
| Surgery (including preoperative care & safety checklists)                      | 4              |
| Terminally ill                                                                 | 1              |
| No specific health condition targeted                                          | 17             |
| <b>Where care is provided and changes to the healthcare environment (n=55)</b> |                |
| Aging (general)                                                                | 2              |
| Asthma                                                                         | 1              |
| Cancer                                                                         | 2              |
| Chronic conditions (multiple included in review or multi-morbidity)            | 1              |
| Chronic kidney disease                                                         | 2              |
| Chronic obstructive pulmonary disease (COPD)                                   | 3              |
| Critically ill                                                                 | 1              |
| Cardiovascular disease (CVD)                                                   | 5              |
| Cystic fibrosis                                                                | 1              |

|                                                                                                                              |    |
|------------------------------------------------------------------------------------------------------------------------------|----|
| Human immunodeficiency virus (HIV)                                                                                           | 1  |
| Lifestyle & Prevention (immunisations, and prevention programs targeting physical activity, drug and alcohol, diet, smoking) | 4  |
| Major trauma                                                                                                                 | 1  |
| Maternal and child health                                                                                                    | 10 |
| Mental health                                                                                                                | 5  |
| Musculoskeletal conditions                                                                                                   | 2  |
| Sexual and reproductive health                                                                                               | 1  |
| Surgery (including preoperative care & safety checklists)                                                                    | 1  |
| Terminally ill                                                                                                               | 2  |
| No specific health condition targeted                                                                                        | 10 |
| <b>Who provides care and how the healthcare workforce is managed (n=80)</b>                                                  |    |
| Acute respiratory infections                                                                                                 | 1  |
| Ageing                                                                                                                       | 4  |
| Asthma                                                                                                                       | 2  |
| Bowel conditions                                                                                                             | 1  |
| Cancer                                                                                                                       | 4  |
| Chronic conditions (multiple included in review or multi-morbidity)                                                          | 8  |
| Chronic kidney disease                                                                                                       | 1  |
| Chronic obstructive pulmonary disease (COPD)                                                                                 | 1  |
| Cardiovascular disease (CVD)                                                                                                 | 6  |
| Dementia                                                                                                                     | 1  |
| Diabetes                                                                                                                     | 2  |
| Human immunodeficiency virus (HIV)                                                                                           | 2  |
| Lifestyle & Prevention (immunisations, and prevention programs targeting physical activity, drug and alcohol, diet, smoking) | 4  |
| Major trauma                                                                                                                 | 2  |
| Maternal and child health                                                                                                    | 5  |
| Mental health                                                                                                                | 6  |
| Multiple sclerosis                                                                                                           | 1  |
| Musculoskeletal conditions                                                                                                   | 1  |
| Oral health                                                                                                                  | 3  |

|                                                                                                                              |    |
|------------------------------------------------------------------------------------------------------------------------------|----|
| Sexual and reproductive health                                                                                               | 2  |
| Surgery (including preoperative care & safety checklists)                                                                    | 5  |
| Terminally ill                                                                                                               | 1  |
| No specific health condition targeted                                                                                        | 17 |
| <b>Coordination of care and management of care processes (n=122)</b>                                                         |    |
| Acute respiratory infections                                                                                                 | 1  |
| Ageing                                                                                                                       | 7  |
| Asthma                                                                                                                       | 2  |
| Cancer                                                                                                                       | 9  |
| Chronic conditions (multiple included in review or multi-morbidity)                                                          | 7  |
| Chronic kidney disease                                                                                                       | 2  |
| Chronic viral hepatitis                                                                                                      | 1  |
| Chronic obstructive pulmonary disease (COPD)                                                                                 | 2  |
| Critically ill                                                                                                               | 2  |
| Cardiovascular disease (CVD)                                                                                                 | 6  |
| Dementia                                                                                                                     | 7  |
| Diabetes                                                                                                                     | 8  |
| Epilepsy                                                                                                                     | 2  |
| Haemophilia                                                                                                                  | 1  |
| Human immunodeficiency virus (HIV)                                                                                           | 4  |
| Intellectual disability                                                                                                      | 1  |
| Lifestyle & Prevention (immunisations, and prevention programs targeting physical activity, drug and alcohol, diet, smoking) | 1  |
| Major trauma                                                                                                                 | 1  |
| Maternal and child health                                                                                                    | 8  |
| Mental health                                                                                                                | 9  |
| Musculoskeletal conditions                                                                                                   | 4  |
| Surgery (including preoperative care & safety checklists)                                                                    | 4  |
| Terminally ill                                                                                                               | 6  |
| No specific health condition targeted                                                                                        | 27 |
| <b>Information and communication technology systems (n=189)</b>                                                              |    |
| Ageing                                                                                                                       | 1  |

|                                                                                                                              |    |
|------------------------------------------------------------------------------------------------------------------------------|----|
| Amyotrophic lateral sclerosis                                                                                                | 1  |
| Asthma                                                                                                                       | 3  |
| Bowel conditions                                                                                                             | 2  |
| Cancer                                                                                                                       | 4  |
| Chronic conditions (multiple included in review or multi-morbidity)                                                          | 16 |
| Chronic kidney disease                                                                                                       | 1  |
| Chronic obstructive pulmonary disease (COPD)                                                                                 | 2  |
| Cardiovascular disease (CVD)                                                                                                 | 9  |
| Dementia                                                                                                                     | 2  |
| Diabetes                                                                                                                     | 15 |
| Eye care                                                                                                                     | 3  |
| Human immunodeficiency virus (HIV)                                                                                           | 6  |
| Inflammatory bowel disease                                                                                                   | 1  |
| Lifestyle & Prevention (immunisations, and prevention programs targeting physical activity, drug and alcohol, diet, smoking) | 39 |
| Maternal and child health                                                                                                    | 5  |
| Mental health                                                                                                                | 44 |
| Multiple sclerosis                                                                                                           | 1  |
| Musculoskeletal conditions                                                                                                   | 3  |
| Sexual and reproductive health                                                                                               | 2  |
| Surgery (including preoperative care & safety checklists)                                                                    | 4  |
| Tuberculosis                                                                                                                 | 1  |
| No specific health condition targeted                                                                                        | 24 |
| <b>Goal-focused reviews (n=38)</b>                                                                                           |    |
| Cancer                                                                                                                       | 2  |
| Chronic conditions (multiple included in review or multi-morbidity)                                                          | 4  |
| Critically ill                                                                                                               | 1  |
| Cardiovascular disease (CVD)                                                                                                 | 5  |
| Diabetes                                                                                                                     | 4  |
| Human immunodeficiency virus (HIV)                                                                                           | 1  |
| Lifestyle & Prevention (immunisations, and prevention programs targeting physical activity, drug and alcohol, diet, smoking) | 5  |

|                                       |            |
|---------------------------------------|------------|
| Maternal and child health             | 3          |
| Mental health                         | 2          |
| Musculoskeletal conditions            | 1          |
| Sexual and reproductive health        | 1          |
| No specific health condition targeted | 9          |
| <b>Total</b>                          | <b>531</b> |
